# Supplementary material for: Activation of the cGAS-STING pathway mediated by Irgm1 contributes to the development of restrictive cardiomyopathy induced by cTnIR193H mutation
Source: Research Square preprint supplement (doi:10.21203/rs.3.rs-6200397/v1), 2025-04-04
Supplement: Supplementary file 1 [file 184f4e8235ad621309a6c406.xlsx]

## Sheet: proteinGroups
Protein	Protein Name	Gene Name	Function	ProteinGroup	FastaHeaders	Proteins	Peptides	RazorUniquePeptides	UniquePeptides	Coverage	MolWeight	LFQ intensity M193-2-1	LFQ intensity M193-2-2	LFQ intensity M193-2-3	LFQ intensity M193-2-4	LFQ intensity GPF-4-1	LFQ intensity GPF-4-2	LFQ intensity GPF-4-3	LFQ intensity GPF-4-4	LFQ intensity WT-1-1	LFQ intensity WT-1-2	LFQ intensity WT-1-3	LFQ intensity WT-1-4		Identified or Quantified
A2A8U2	Transmembrane protein 201	Tmem201	FUNCTION: Involved in nuclear movement during fibroblast polarization and migration (PubMed:22349700). May recruit Ran GTPase to the nuclear periphery (By similarity). {ECO:0000250|UniProtKB:Q5SNT2, ECO:0000269|PubMed:22349700}.; FUNCTION: [Isoform 2]: May define a distinct membrane domain in the vicinity of the mitotic spindle. Involved in the organization of the nuclear envelope implicating EMD…	sp|A2A8U2|TM201_MOUSE	sp|A2A8U2|TM201_MOUSE Transmembrane protein 201 OS=Mus musculus OX=10090 GN=Tmem201 PE=1 SV=1	1	4	4	4	7.7	72.499	32069000		30296000	26009000				54320000				25722000		Quantified
A2A974	Cytochrome P450 4A12B	Cyp4a12b	FUNCTION: A cytochrome P450 monooxygenase involved in the metabolism of fatty acids and their oxygenated derivatives (oxylipins) (PubMed:17112342). Mechanistically, uses molecular oxygen inserting one oxygen atom into a substrate, and reducing the second into a water molecule, with two electrons provided by NADPH via cytochrome P450 reductase (CPR; NADPH-ferrihemoprotein reductase) (PubMed:171123…	sp|A2A974|CP4CB_MOUSE;sp|O35728|CP4AE_MOUSE;sp|Q91WL5|CP4CA_MOUSE;sp|O88833|CP4AA_MOUSE	sp|A2A974|CP4CB_MOUSE Cytochrome P450 4A12B OS=Mus musculus OX=10090 GN=Cyp4a12b PE=1 SV=1	4	3	3	3	4.7	58.309	127490000	152080000	146860000	134540000	165630000	121980000	147870000	262400000	392260000	127220000	208480000	220970000		Quantified
A2AAJ9	Obscurin	Obscn	FUNCTION: Structural component of striated muscles which plays a role in myofibrillogenesis. Probably involved in the assembly of myosin into sarcomeric A bands in striated muscle (By similarity). Has serine/threonine protein kinase activity and phosphorylates N-cadherin CDH2 and sodium/potassium-transporting ATPase subunit ATP1B1 (PubMed:23392350). Binds (via the PH domain) strongly to phosphati…	sp|A2AAJ9|OBSCN_MOUSE	sp|A2AAJ9|OBSCN_MOUSE Obscurin OS=Mus musculus OX=10090 GN=Obscn PE=1 SV=3	1	149	149	149	27.9	966.58	4696000000	4341600000	5222800000	5456900000	5140400000	5275100000	4073300000	5322900000	4137200000	4609300000	5309000000	2911800000		Quantified
A2ADF7	Solute carrier family 25 member 34	Slc25a34		sp|A2ADF7|S2534_MOUSE	sp|A2ADF7|S2534_MOUSE Solute carrier family 25 member 34 OS=Mus musculus OX=10090 GN=Slc25a34 PE=1 SV=1	1	5	5	5	17.3	33.778				43246000	33501000	54370000	41489000	49492000	32288000	31135000	44525000	34193000		Quantified
A2AIL4	NADH dehydrogenase (ubiquinone) complex I, assembly factor 6	Ndufaf6	FUNCTION: Involved in the assembly of mitochondrial NADH:ubiquinone oxidoreductase complex (complex I) at early stages. May play a role in the biogenesis of MT-ND1 (By similarity). {ECO:0000250}.	sp|A2AIL4|NDUF6_MOUSE	sp|A2AIL4|NDUF6_MOUSE NADH dehydrogenase (ubiquinone) complex I, assembly factor 6 OS=Mus musculus OX=10090 GN=Ndufaf6 PE=1 SV=1	1	7	7	7	29.4	38.362	160730000	187040000	126390000	191060000	218500000	170950000	184980000	191990000	185350000	114960000	200120000	188680000		Quantified
A2AIV2	Protein virilizer homolog	Virma	FUNCTION: Associated component of the WMM complex, a complex that mediates N6-methyladenosine (m6A) methylation of RNAs, a modification that plays a role in the efficiency of mRNA splicing and RNA processing. Acts as a key regulator of m6A methylation by promoting m6A methylation of mRNAs in the 3'-UTR near the stop codon: recruits the catalytic core components METTL3 and METTL14, thereby guiding…	sp|A2AIV2|VIR_MOUSE	sp|A2AIV2|VIR_MOUSE Protein virilizer homolog OS=Mus musculus OX=10090 GN=Virma PE=1 SV=1	1	3	3	3	2.5	201.44	141240000	126560000	141780000	126090000	150760000	138020000	128890000	145580000	160620000	100730000	133480000	167240000		Quantified
A2ALW5	DnaJ homolog subfamily C member 25	Dnajc25		sp|A2ALW5|DJC25_MOUSE	sp|A2ALW5|DJC25_MOUSE DnaJ homolog subfamily C member 25 OS=Mus musculus OX=10090 GN=Dnajc25 PE=1 SV=1	1	2	2	2	5.6	41.937	22467000	24063000	24001000	18810000	28977000	27142000		30596000	28922000	20793000	18336000	34634000		Quantified
A2AMM0	Caveolae-associated protein 4	Cavin4	FUNCTION: Modulates the morphology of formed caveolae in cardiomyocytes, but is not required for caveolar formation. Facilitates the recruitment of MAPK1/3 to caveolae within cardiomyocytes and regulates alpha-1 adrenergic receptor-induced hypertrophic responses in cardiomyocytes through MAPK1/3 activation (PubMed:24567387). Contributes to proper membrane localization and stabilization of caveoli…	sp|A2AMM0|CAVN4_MOUSE	sp|A2AMM0|CAVN4_MOUSE Caveolae-associated protein 4 OS=Mus musculus OX=10090 GN=Cavin4 PE=1 SV=1	1	7	7	7	25.1	41.008	230750000	142110000	199910000	228210000	184530000	275210000	160110000	204330000	173250000	286750000	309470000	222200000		Quantified
A2APY7	Arginine-hydroxylase NDUFAF5, mitochondrial	Ndufaf5	FUNCTION: Arginine hydroxylase involved in the assembly of mitochondrial NADH:ubiquinone oxidoreductase complex (complex I, MT-ND1) at early stages. Acts by mediating hydroxylation of 'Arg-111' of NDUFS7. May also have methyltransferase activity. {ECO:0000250|UniProtKB:Q5TEU4}.	sp|A2APY7|NDUF5_MOUSE	sp|A2APY7|NDUF5_MOUSE Arginine-hydroxylase NDUFAF5, mitochondrial OS=Mus musculus OX=10090 GN=Ndufaf5 PE=1 SV=1	1	5	5	5	15.2	38.404	58054000	115470000	57551000	68199000	111750000	79178000	48787000	70954000	118850000	86710000	76097000	89897000		Quantified
A2AQ07	Tubulin beta-1 chain	Tubb1	FUNCTION: Tubulin is the major constituent of microtubules. It binds two moles of GTP, one at an exchangeable site on the beta chain and one at a non-exchangeable site on the alpha chain (By similarity). {ECO:0000250}.	sp|A2AQ07|TBB1_MOUSE;CON__ENSEMBL:ENSBTAP00000025008	sp|A2AQ07|TBB1_MOUSE Tubulin beta-1 chain OS=Mus musculus OX=10090 GN=Tubb1 PE=1 SV=1	2	10	7	7	27.1	50.44	44719000	129420000							243330000			191600000		Identified
A2AQP0	Myosin-7B	Myh7b	FUNCTION: Involved in muscle contraction. {ECO:0000250}.	sp|A2AQP0|MYH7B_MOUSE	sp|A2AQP0|MYH7B_MOUSE Myosin-7B OS=Mus musculus OX=10090 GN=Myh7b PE=3 SV=1	1	23	6	6	6.6	221.49	246860000	243320000	232030000	144390000	213870000	164960000	166710000	178670000	466830000	197880000	1026800000	363470000		Quantified
A2ASS6	Titin	Ttn	FUNCTION: Key component in the assembly and functioning of vertebrate striated muscles. By providing connections at the level of individual microfilaments, it contributes to the fine balance of forces between the two halves of the sarcomere. The size and extensibility of the cross-links are the main determinants of sarcomere extensibility properties of muscle. In non-muscle cells, seems to play a…	sp|A2ASS6|TITIN_MOUSE	sp|A2ASS6|TITIN_MOUSE Titin OS=Mus musculus OX=10090 GN=Ttn PE=1 SV=1	1	1390	1390	1390	49.3	3906.4	187820000000	202920000000	186690000000	179310000000	206950000000	184740000000	176630000000	179850000000	156190000000	180790000000	206980000000	103100000000		Quantified
A2AUC9	Kelch-like protein 41	Klhl41	FUNCTION: Involved in skeletal muscle development and differentiation. Regulates proliferation and differentiation of myoblasts and plays a role in myofibril assembly by promoting lateral fusion of adjacent thin fibrils into mature, wide myofibrils. Required for pseudopod elongation in transformed cells. {ECO:0000269|PubMed:18178185, ECO:0000269|PubMed:21368295, ECO:0000269|PubMed:22562206}.	sp|A2AUC9|KLH41_MOUSE;REV__sp|Q80VM7|ANR24_MOUSE	sp|A2AUC9|KLH41_MOUSE Kelch-like protein 41 OS=Mus musculus OX=10090 GN=Klhl41 PE=1 SV=1	2	6	6	6	11.4	68.189	37612000	18824000	30932000	21480000	46004000	41963000			37897000			35276000		Quantified
A3KFX0	Cytosolic 5-nucleotidase 1A	Nt5c1a	FUNCTION: Dephosphorylates the 5' and 2'(3')-phosphates of deoxyribonucleotides and has a broad substrate specificity. Helps to regulate adenosine levels in heart during ischemia and hypoxia (By similarity). {ECO:0000250}.	sp|A3KFX0|5NT1A_MOUSE	sp|A3KFX0|5NT1A_MOUSE Cytosolic 5-nucleotidase 1A OS=Mus musculus OX=10090 GN=Nt5c1a PE=1 SV=1	1	8	8	8	31.5	40.678	45205000	71929000	82091000	33426000	53976000	51130000	49357000	42017000	67105000		81128000	33505000		Quantified
A6H611	Mitochondrial intermediate peptidase	Mipep	FUNCTION: Cleaves proteins, imported into the mitochondrion, to their mature size. {ECO:0000250}.	sp|A6H611|MIPEP_MOUSE	sp|A6H611|MIPEP_MOUSE Mitochondrial intermediate peptidase OS=Mus musculus OX=10090 GN=Mipep PE=1 SV=1	1	7	7	7	12	80.851	26591000	15184000	22419000		28733000	26259000	39029000	39935000	20790000	34345000	23515000	205180000		Quantified
B1AR13	CDGSH iron-sulfur domain-containing protein 3, mitochondrial	Cisd3	FUNCTION: Can transfer its iron-sulfur clusters to the apoferrodoxins FDX1 and FDX2. Contributes to mitochondrial iron homeostasis and in maintaining normal levels of free iron and reactive oxygen species, and thereby contributes to normal mitochondrial function. {ECO:0000250|UniProtKB:P0C7P0}.	sp|B1AR13|CISD3_MOUSE	sp|B1AR13|CISD3_MOUSE CDGSH iron-sulfur domain-containing protein 3, mitochondrial OS=Mus musculus OX=10090 GN=Cisd3 PE=1 SV=1	1	6	6	6	42.3	15.676	1159900000	1178200000	1174900000	1305600000	1645800000	1412900000	2228500000	1395200000	1069900000	1484100000	1088300000	1641900000		Quantified
B2RXS4	Plexin-B2	Plxnb2	FUNCTION: Cell surface receptor for SEMA4C, SEMA4D and SEMA4G that plays an important role in cell-cell signaling (PubMed:17554007). Plays a role in glutamatergic synapse development and is required for SEMA4A-mediated excitatory synapse development (PubMed:29981480). Binding to class 4 semaphorins promotes downstream activation of RHOA and phosphorylation of ERBB2 at 'Tyr-1248' (PubMed:17554007)…	sp|B2RXS4|PLXB2_MOUSE	sp|B2RXS4|PLXB2_MOUSE Plexin-B2 OS=Mus musculus OX=10090 GN=Plxnb2 PE=1 SV=1	1	7	7	7	4.9	206.23	24376000		18523000	28036000	14626000	19524000		17324000	16519000	15680000	14906000	23066000		Quantified
B9EJ86	Oxysterol-binding protein-related protein 8	Osbpl8	FUNCTION: Lipid transporter involved in lipid countertransport between the endoplasmic reticulum and the plasma membrane: specifically exchanges phosphatidylserine with phosphatidylinositol 4-phosphate (PI4P), delivering phosphatidylserine to the plasma membrane in exchange for PI4P, which is degraded by the SAC1/SACM1L phosphatase in the endoplasmic reticulum. Binds phosphatidylserine and PI4P i…	sp|B9EJ86|OSBL8_MOUSE	sp|B9EJ86|OSBL8_MOUSE Oxysterol-binding protein-related protein 8 OS=Mus musculus OX=10090 GN=Osbpl8 PE=1 SV=1	1	2	2	2	3.1	101.27	12943000			20409000	13010000	19427000					15142000			Identified
D3YXK2	Scaffold attachment factor B1	Safb	FUNCTION: Binds to scaffold/matrix attachment region (S/MAR) DNA and forms a molecular assembly point to allow the formation of a 'transcriptosomal' complex (consisting of SR proteins and RNA polymerase II) coupling transcription and RNA processing. Can function as an estrogen receptor corepressor and can also bind to the HSP27 promoter and decrease its transcription. Can inhibit cell proliferati…	sp|D3YXK2|SAFB1_MOUSE;sp|Q80YR5|SAFB2_MOUSE	sp|D3YXK2|SAFB1_MOUSE Scaffold attachment factor B1 OS=Mus musculus OX=10090 GN=Safb PE=1 SV=2;sp|Q80YR5|SAFB2_MOUSE Scaffold attachment factor B2 OS=Mus musculus OX=10090 GN=Safb2 PE=1 SV=2	2	3	3	3	4.1	105.1	13549000			17654000								11770000		Identified
D3YYU8	Obscurin-like protein 1	Obsl1	FUNCTION: Core component of the 3M complex, a complex required to regulate microtubule dynamics and genome integrity. It is unclear how the 3M complex regulates microtubules, it could act by controlling the level of a microtubule stabilizer. Acts as a regulator of the Cul7-RING(FBXW8) ubiquitin-protein ligase, playing a critical role in the ubiquitin ligase pathway that regulates Golgi morphogene…	sp|D3YYU8|OBSL1_MOUSE	sp|D3YYU8|OBSL1_MOUSE Obscurin-like protein 1 OS=Mus musculus OX=10090 GN=Obsl1 PE=1 SV=1	1	10	10	10	6.9	197.93	63592000	68953000	55577000	66393000	60521000	34482000	44836000	46466000	65192000	50503000	83143000	49795000		Quantified
D3YZG8	Probable bifunctional methylenetetrahydrofolate dehydrogenase/cyclohydrolase 2	Mthfd2l		sp|D3YZG8|MTD2L_MOUSE	sp|D3YZG8|MTD2L_MOUSE Probable bifunctional methylenetetrahydrofolate dehydrogenase/cyclohydrolase 2 OS=Mus musculus OX=10090 GN=Mthfd2l PE=3 SV=1	1	2	2	2	8	36.438				5099100		4768000		3644000		6312200				Identified
D3Z7P3	Glutaminase kidney isoform, mitochondrial	Gls	FUNCTION: Catalyzes the first reaction in the primary pathway for the renal catabolism of glutamine. Plays a role in maintaining acid-base homeostasis. Regulates the levels of the neurotransmitter glutamate, the main excitatory neurotransmitter in the brain. {ECO:0000269|PubMed:16641247, ECO:0000269|PubMed:22228304, ECO:0000269|PubMed:22373647}.	sp|D3Z7P3|GLSK_MOUSE	sp|D3Z7P3|GLSK_MOUSE Glutaminase kidney isoform, mitochondrial OS=Mus musculus OX=10090 GN=Gls PE=1 SV=1	1	7	7	7	14.1	73.963						53962000	27995000		51950000		46504000	71743000		Quantified
D3Z7Q2	Small integral membrane protein 20	Smim20	FUNCTION: [Small integral membrane protein 20]: Component of the MITRAC (mitochondrial translation regulation assembly intermediate of cytochrome c oxidase complex) complex, that regulates cytochrome c oxidase assembly (By similarity). Promotes the progression of complex assembly after the association of MT-CO1/COX1 with COX4I1 and COX6C (By similarity). Chaperone-like assembly factor required to…	sp|D3Z7Q2|SIM20_MOUSE	sp|D3Z7Q2|SIM20_MOUSE Small integral membrane protein 20 OS=Mus musculus OX=10090 GN=Smim20 PE=1 SV=1	1	2	2	2	31.9	7.818	72205000	113420000	118430000	119460000	133460000	95918000	57357000	103880000	128660000	111740000	150880000	103740000		Quantified
E0CYV9	Uncharacterized protein C4orf54 homolog			sp|E0CYV9|CD054_MOUSE	sp|E0CYV9|CD054_MOUSE Uncharacterized protein C4orf54 homolog OS=Mus musculus OX=10090 PE=1 SV=1	1	2	2	2	1.2	189.75	1256400000	789040000	977510000	681430000	486570000	1202400000	753480000	1330500000	752070000	958740000	1198700000	931740000		Quantified
E9PV24	Fibrinogen alpha chain	Fga	FUNCTION: Cleaved by the protease thrombin to yield monomers which, together with fibrinogen beta (FGB) and fibrinogen gamma (FGG), polymerize to form an insoluble fibrin matrix. Fibrin has a major function in hemostasis as one of the primary components of blood clots (PubMed:7649481). In addition, functions during the early stages of wound repair to stabilize the lesion and guide cell migration …	sp|E9PV24|FIBA_MOUSE	sp|E9PV24|FIBA_MOUSE Fibrinogen alpha chain OS=Mus musculus OX=10090 GN=Fga PE=1 SV=1	1	12	12	12	19.6	87.428	50935000	120140000	34852000	73959000	101730000	44328000	346000000	172240000	107250000	41648000	109300000	207880000		Quantified
E9PVA8	eIF-2-alpha kinase activator GCN1	Gcn1	FUNCTION: Acts as a positive activator of the GCN2 protein kinase activity in response to amino acid starvation (PubMed:15937339). Forms a complex with EIF2AK4/GCN2 on translating ribosomes; during this process, GCN1 seems to act as a chaperone to facilitate delivery of uncharged tRNAs that enter the A site of ribosomes to the tRNA-binding domain of EIF2AK4/GCN2, and hence stimulating EIF2AK4/GCN…	sp|E9PVA8|GCN1_MOUSE	sp|E9PVA8|GCN1_MOUSE eIF-2-alpha kinase activator GCN1 OS=Mus musculus OX=10090 GN=Gcn1 PE=1 SV=1	1	3	3	3	1.5	293.02	13697000			11408000		14212000	11441000	11505000	8899600		13594000			Quantified
E9PZQ0	Ryanodine receptor 1	Ryr1	FUNCTION: Calcium channel that mediates the release of Ca(2+) from the sarcoplasmic reticulum into the cytoplasm and thereby plays a key role in triggering muscle contraction following depolarization of T-tubules (PubMed:18003898, PubMed:7515481, PubMed:7621815, PubMed:21156754). Repeated very high-level exercise increases the open probability of the channel and leads to Ca(2+) leaking into the c…	sp|E9PZQ0|RYR1_MOUSE	sp|E9PZQ0|RYR1_MOUSE Ryanodine receptor 1 OS=Mus musculus OX=10090 GN=Ryr1 PE=1 SV=1	1	11	1	1	2.6	565.03	8730300		14861000			8376100					6728700			Identified
E9Q3L2	Phosphatidylinositol 4-kinase alpha	Pi4ka	FUNCTION: Acts on phosphatidylinositol (PtdIns) in the first committed step in the production of the second messenger inositol-1,4,5,-trisphosphate. {ECO:0000250|UniProtKB:P42356}.	sp|E9Q3L2|PI4KA_MOUSE	sp|E9Q3L2|PI4KA_MOUSE Phosphatidylinositol 4-kinase alpha OS=Mus musculus OX=10090 GN=Pi4ka PE=1 SV=2	1	14	14	14	8.4	237.04	93526000	66603000	66851000	102050000	73706000	94200000	60254000	103690000	91704000	89000000	96153000	59459000		Quantified
E9Q401	Ryanodine receptor 2	Ryr2	FUNCTION: Calcium channel that mediates the release of Ca(2+) from the sarcoplasmic reticulum into the cytoplasm and thereby plays a key role in triggering cardiac muscle contraction. Aberrant channel activation can lead to cardiac arrhythmia. In cardiac myocytes, calcium release is triggered by increased Ca(2+) levels due to activation of the L-type calcium channel CACNA1C. The calcium channel a…	sp|E9Q401|RYR2_MOUSE;sp|A2AGL3|RYR3_MOUSE	sp|E9Q401|RYR2_MOUSE Ryanodine receptor 2 OS=Mus musculus OX=10090 GN=Ryr2 PE=1 SV=1	2	173	173	163	46.7	564.81	14824000000	11454000000	12563000000	16991000000	12346000000	11265000000	9219800000	13772000000	10977000000	9765600000	13218000000	11517000000		Quantified
E9Q4Z2	Acetyl-CoA carboxylase 2	Acacb	FUNCTION: Mitochondrial enzyme that catalyzes the carboxylation of acetyl-CoA to malonyl-CoA and plays a central role in fatty acid metabolism (By similarity). Catalyzes a 2 steps reaction starting with the ATP-dependent carboxylation of the biotin carried by the biotin carboxyl carrier (BCC) domain followed by the transfer of the carboxyl group from carboxylated biotin to acetyl-CoA (By similari…	sp|E9Q4Z2|ACACB_MOUSE	sp|E9Q4Z2|ACACB_MOUSE Acetyl-CoA carboxylase 2 OS=Mus musculus OX=10090 GN=Acacb PE=1 SV=1	1	104	104	90	59.2	275.75	14159000000	20308000000	11763000000	8057900000	14192000000	9712800000	26742000000	12821000000	11496000000	12334000000	9383000000	11400000000		Quantified
E9Q557	Desmoplakin	Dsp	FUNCTION: Major high molecular weight protein of desmosomes. Involved in the organization of the desmosomal cadherin-plakoglobin complexes into discrete plasma membrane domains and in the anchoring of intermediate filaments to the desmosomes.	sp|E9Q557|DESP_MOUSE	sp|E9Q557|DESP_MOUSE Desmoplakin OS=Mus musculus OX=10090 GN=Dsp PE=1 SV=1	1	56	56	56	24.5	332.91	1189200000	767610000	997230000	1026800000	881790000	836350000	879750000	1018700000	588010000	712430000	790690000	725600000		Quantified
E9Q6P5	Tetratricopeptide repeat protein 7B	Ttc7b	FUNCTION: Component of a complex required to localize phosphatidylinositol 4-kinase (PI4K) to the plasma membrane. The complex acts as a regulator of phosphatidylinositol 4-phosphate (PtdIns(4)P) synthesis. In the complex, plays a central role in bridging PI4KA to EFR3B and FAM126A, via direct interactions. {ECO:0000250|UniProtKB:Q86TV6}.	sp|E9Q6P5|TTC7B_MOUSE	sp|E9Q6P5|TTC7B_MOUSE Tetratricopeptide repeat protein 7B OS=Mus musculus OX=10090 GN=Ttc7b PE=1 SV=1	1	11	11	11	18.1	94.202	33872000	52201000	65647000	60797000	83012000	76365000	32500000	56316000	43790000	60456000	50330000	41542000		Quantified
E9Q7G0	Nuclear mitotic apparatus protein 1	Numa1	FUNCTION: Microtubule (MT)-binding protein that plays a role in the formation and maintenance of the spindle poles and the alignement and the segregation of chromosomes during mitotic cell division (PubMed:19255246, PubMed:24109598, PubMed:26765568). Functions to tether the minus ends of MTs at the spindle poles, which is critical for the establishment and maintenance of the spindle poles (PubMed…	sp|E9Q7G0|NUMA1_MOUSE	sp|E9Q7G0|NUMA1_MOUSE Nuclear mitotic apparatus protein 1 OS=Mus musculus OX=10090 GN=Numa1 PE=1 SV=1	1	20	20	20	13	235.63	164010000	107230000	50087000	213910000	29131000	40979000	34263000	147870000	46122000	56421000	42046000	43441000		Quantified
E9Q9K5	Triadin	Trdn	FUNCTION: Contributes to the regulation of lumenal Ca2+ release via the sarcoplasmic reticulum calcium release channels RYR1 and RYR2, a key step in triggering skeletal and heart muscle contraction. Required for normal organization of the triad junction, where T-tubules and the sarcoplasmic reticulum terminal cisternae are in close contact. Required for normal skeletal muscle strength (PubMed:198…	sp|E9Q9K5|TRDN_MOUSE	sp|E9Q9K5|TRDN_MOUSE Triadin OS=Mus musculus OX=10090 GN=Trdn PE=1 SV=1	1	1	1	1	2.7	77.843														Identified
E9QA62	Leiomodin-3	Lmod3	FUNCTION: Essential for the organization of sarcomeric actin thin filaments in skeletal muscle (PubMed:25774500, PubMed:26035871). Increases the rate of actin polymerization (By similarity). {ECO:0000250|UniProtKB:Q0VAK6, ECO:0000269|PubMed:26035871}.	sp|E9QA62|LMOD3_MOUSE	sp|E9QA62|LMOD3_MOUSE Leiomodin-3 OS=Mus musculus OX=10090 GN=Lmod3 PE=1 SV=1	1	3	3	3	5.8	65.688	74866000	67421000	44941000	61026000	41788000			29018000	36764000	38402000	58201000	73147000		Quantified
E9QMW4	Uncharacterized protein C16orf96 homolog			sp|E9QMW4|CP096_MOUSE	sp|E9QMW4|CP096_MOUSE Uncharacterized protein C16orf96 homolog OS=Mus musculus OX=10090 PE=2 SV=1	1	2	2	2	1.4	127.66	439620000	402140000	357570000	336440000	349420000	267830000	300330000	409910000	348640000	398430000	406510000	243080000		Quantified
G5E829	Plasma membrane calcium-transporting ATPase 1	Atp2b1	FUNCTION: Catalyzes the hydrolysis of ATP coupled with the transport of calcium from the cytoplasm to the extracellular space thereby maintaining intracellular calcium homeostasis (PubMed:22311909, PubMed:16956963, PubMed:28827723, PubMed:26392310, PubMed:29950683, PubMed:24805951, PubMed:23266958). Plays a role in blood pressure regulation through regulation of intracellular calcium concentratio…	sp|G5E829|AT2B1_MOUSE;sp|Q9R0K7|AT2B2_MOUSE	sp|G5E829|AT2B1_MOUSE Plasma membrane calcium-transporting ATPase 1 OS=Mus musculus OX=10090 GN=Atp2b1 PE=1 SV=1	2	7	7	6	7.5	134.75	59594000	50040000	57102000	65474000	49328000	57231000	31814000	63531000	34292000		59625000	40898000		Quantified
G5E8K5	Ankyrin-3	Ank3	FUNCTION: Membrane-cytoskeleton linker. May participate in the maintenance/targeting of ion channels and cell adhesion molecules at the nodes of Ranvier and axonal initial segments (By similarity). In skeletal muscle, required for costamere localization of DMD and betaDAG1. Regulates KCNA1 channel activity in function of dietary Mg(2+) levels, and thereby contributes to the regulation of renal Mg…	sp|G5E8K5|ANK3_MOUSE	sp|G5E8K5|ANK3_MOUSE Ankyrin-3 OS=Mus musculus OX=10090 GN=Ank3 PE=1 SV=1	1	2	1	1	1.1	214.06	12227000	12180000	9849500	13298000	10967000	10574000	11487000	10878000	12519000			16670000		Quantified
O08528	Hexokinase-2	Hk2	FUNCTION: Catalyzes the phosphorylation of hexose, such as D-glucose and D-fructose, to hexose 6-phosphate (D-glucose 6-phosphate and D-fructose 6-phosphate, respectively) (By similarity). Mediates the initial step of glycolysis by catalyzing phosphorylation of D-glucose to D-glucose 6-phosphate (By similarity). Plays a key role in maintaining the integrity of the outer mitochondrial membrane by …	sp|O08528|HXK2_MOUSE;sp|Q3TRM8|HXK3_MOUSE	sp|O08528|HXK2_MOUSE Hexokinase-2 OS=Mus musculus OX=10090 GN=Hk2 PE=1 SV=1	2	37	37	33	49	102.53	4283900000	4082300000	4136800000	5397800000	4850100000	3807200000	3227600000	5085200000	4870500000	4743900000	5763300000	3503300000		Quantified
O08529	Calpain-2 catalytic subunit	Capn2	FUNCTION: Calcium-regulated non-lysosomal thiol-protease which catalyzes limited proteolysis of substrates involved in cytoskeletal remodeling and signal transduction. Proteolytically cleaves MYOC at 'Arg-226' (By similarity). Proteolytically cleaves CPEB3 following neuronal stimulation which abolishes CPEB3 translational repressor activity, leading to translation of CPEB3 target mRNAs (PubMed:22…	sp|O08529|CAN2_MOUSE	sp|O08529|CAN2_MOUSE Calpain-2 catalytic subunit OS=Mus musculus OX=10090 GN=Capn2 PE=1 SV=4	1	10	10	10	17.6	79.871	444670000	606500000		547930000	673050000	710520000	708400000	532140000	1032400000		413330000	918110000		Quantified
O08547	Vesicle-trafficking protein SEC22b	Sec22b	FUNCTION: SNARE involved in targeting and fusion of ER-derived transport vesicles with the Golgi complex as well as Golgi-derived retrograde transport vesicles with the ER.	sp|O08547|SC22B_MOUSE	sp|O08547|SC22B_MOUSE Vesicle-trafficking protein SEC22b OS=Mus musculus OX=10090 GN=Sec22b PE=1 SV=3	1	7	7	7	40.5	24.74	114250000	133670000	153610000	152370000	166550000	169470000	129270000	165260000	114220000	118810000	118630000	126710000		Quantified
O08553	Dihydropyrimidinase-related protein 2	Dpysl2	FUNCTION: Plays a role in neuronal development and polarity, as well as in axon growth and guidance, neuronal growth cone collapse and cell migration. Necessary for signaling by class 3 semaphorins and subsequent remodeling of the cytoskeleton. May play a role in endocytosis. {ECO:0000269|PubMed:22057101}.	sp|O08553|DPYL2_MOUSE	sp|O08553|DPYL2_MOUSE Dihydropyrimidinase-related protein 2 OS=Mus musculus OX=10090 GN=Dpysl2 PE=1 SV=2	1	12	12	11	32.5	62.277	88166000	102090000	147980000	75942000	113620000	127370000	70583000	78706000	127360000	161520000	140390000	103900000		Quantified
O08573	Galectin-9	Lgals9	FUNCTION: Binds galactosides (By similarity). Has high affinity for the Forssman pentasaccharide (By similarity). Ligand for HAVCR2/TIM3 (By similarity). Binding to HAVCR2 induces T-helper type 1 lymphocyte (Th1) death (By similarity). Also stimulates bactericidal activity in infected macrophages by causing macrophage activation and IL1B secretion which restricts intracellular bacterial growth (P…	sp|O08573|LEG9_MOUSE	sp|O08573|LEG9_MOUSE Galectin-9 OS=Mus musculus OX=10090 GN=Lgals9 PE=1 SV=1	1	2	2	2	5.7	40.035	25299000			25275000		16744000						67584000		Identified
O08579	Emerin	Emd	FUNCTION: Stabilizes and promotes the formation of a nuclear actin cortical network. Stimulates actin polymerization in vitro by binding and stabilizing the pointed end of growing filaments. Inhibits beta-catenin activity by preventing its accumulation in the nucleus. Acts by influencing the nuclear accumulation of beta-catenin through a CRM1-dependent export pathway. Links centrosomes to the nuc…	sp|O08579|EMD_MOUSE	sp|O08579|EMD_MOUSE Emerin OS=Mus musculus OX=10090 GN=Emd PE=1 SV=1	1	3	3	3	17	29.435		31540000	45400000	20299000					37836000					Quantified
O08582	GTP-binding protein 1	Gtpbp1	FUNCTION: Promotes degradation of target mRNA species. Plays a role in the regulation of circadian mRNA stability. Binds GTP and has GTPase activity (By similarity). {ECO:0000250}.	sp|O08582|GTPB1_MOUSE	sp|O08582|GTPB1_MOUSE GTP-binding protein 1 OS=Mus musculus OX=10090 GN=Gtpbp1 PE=1 SV=2	1	3	3	3	5.7	72.3	31046000	37742000		26877000	28266000	24907000	20427000	26567000	33432000	24517000	25507000	27814000		Quantified
O08583	THO complex subunit 4	Alyref	FUNCTION: Export adapter involved in nuclear export of spliced and unspliced mRNA. Binds mRNA which is thought to be transferred to the NXF1-NXT1 heterodimer for export (TAP/NFX1 pathway) (PubMed:9119228, PubMed:10786854, PubMed:11158589). Component of the TREX complex which is thought to couple mRNA transcription, processing and nuclear export, and specifically associates with spliced mRNA and n…	sp|O08583|THOC4_MOUSE;sp|Q9JJW6|ALRF2_MOUSE	sp|O08583|THOC4_MOUSE THO complex subunit 4 OS=Mus musculus OX=10090 GN=Alyref PE=1 SV=3	2	3	3	3	18.4	26.94				19623000				20577000						Quantified
O08600	Endonuclease G, mitochondrial	Endog	FUNCTION: Cleaves DNA at double-stranded (DG)n.(DC)n and at single-stranded (DC)n tracts. In addition to deoxyribonuclease activities, also has ribonuclease (RNase) and RNase H activities. Capable of generating the RNA primers required by DNA polymerase gamma to initiate replication of mitochondrial DNA (By similarity). {ECO:0000250}.	sp|O08600|NUCG_MOUSE	sp|O08600|NUCG_MOUSE Endonuclease G, mitochondrial OS=Mus musculus OX=10090 GN=Endog PE=1 SV=1	1	4	4	4	17.3	32.19	69513000	53409000	51335000	45030000	64966000	48425000	38696000	44942000	57681000	34978000	52424000	170310000		Quantified
O08638	Myosin-11	Myh11	FUNCTION: Muscle contraction.	sp|O08638|MYH11_MOUSE	sp|O08638|MYH11_MOUSE Myosin-11 OS=Mus musculus OX=10090 GN=Myh11 PE=1 SV=1	1	93	78	73	48.9	227.03	5107100000	7159400000	4911100000	2562400000	6475100000	7480500000	18133000000	8308400000	4112900000	4647800000	6643200000	4315900000		Quantified
O08709	Peroxiredoxin-6	Prdx6	FUNCTION: Thiol-specific peroxidase that catalyzes the reduction of hydrogen peroxide and organic hydroperoxides to water and alcohols, respectively. Can reduce H(2)O(2) and short chain organic, fatty acid, and phospholipid hydroperoxides. Also has phospholipase activity, and can therefore either reduce the oxidized sn-2 fatty acyl grup of phospholipids (peroxidase activity) or hydrolyze the sn-2…	sp|O08709|PRDX6_MOUSE	sp|O08709|PRDX6_MOUSE Peroxiredoxin-6 OS=Mus musculus OX=10090 GN=Prdx6 PE=1 SV=3	1	12	12	12	62.5	24.87	601140000	720260000	698600000	659950000	613890000	555400000	578130000	643070000	887980000	933750000	888430000	576640000		Quantified
O08715	A-kinase anchor protein 1, mitochondrial	Akap1	FUNCTION: Differentially targeted protein that binds to type I and II regulatory subunits of protein kinase A. Anchors them to the cytoplasmic face of the mitochondrial outer membrane or allows them to reside in the endoplasmic reticulum. Does not contain the classic KDEL endoplasmic reticulum-targeting sequence. This explains how it is able to switch its localization, either being in the endopla…	sp|O08715|AKAP1_MOUSE	sp|O08715|AKAP1_MOUSE A-kinase anchor protein 1, mitochondrial OS=Mus musculus OX=10090 GN=Akap1 PE=1 SV=4	1	4	4	4	4.9	92.194	68809000	37122000	55737000	58569000	48596000	54879000	44822000	55288000	39558000	48446000	55179000	45941000		Quantified
O08734	Bcl-2 homologous antagonist/killer	Bak1	FUNCTION: In the presence of an appropriate stimulus, accelerates programmed cell death by binding to, and antagonizing the anti-apoptotic action of BCL2. {ECO:0000250}.	sp|O08734|BAK_MOUSE	sp|O08734|BAK_MOUSE Bcl-2 homologous antagonist/killer OS=Mus musculus OX=10090 GN=Bak1 PE=1 SV=3	1	2	2	2	10	23.294	7030900	3661800	3395700	5376100	5496500	4662200		7200700				5912400		Quantified
O08739	AMP deaminase 3	Ampd3	FUNCTION: AMP deaminase plays a critical role in energy metabolism.	sp|O08739|AMPD3_MOUSE	sp|O08739|AMPD3_MOUSE AMP deaminase 3 OS=Mus musculus OX=10090 GN=Ampd3 PE=1 SV=2	1	6	6	6	9.4	88.651	45008000	47043000		36190000	33971000	43824000	38593000	32138000	59650000		48799000	32367000		Quantified
O08749	Dihydrolipoyl dehydrogenase, mitochondrial	Dld	FUNCTION: Lipoamide dehydrogenase is a component of the glycine cleavage system as well as an E3 component of three alpha-ketoacid dehydrogenase complexes (pyruvate-, alpha-ketoglutarate-, and branched-chain amino acid-dehydrogenase complex) (By similarity). The 2-oxoglutarate dehydrogenase complex is mainly active in the mitochondrion (By similarity). A fraction of the 2-oxoglutarate dehydrogena…	sp|O08749|DLDH_MOUSE	sp|O08749|DLDH_MOUSE Dihydrolipoyl dehydrogenase, mitochondrial OS=Mus musculus OX=10090 GN=Dld PE=1 SV=2	1	17	17	17	41.8	54.272	4410700000	7063200000	4334800000	4228300000	3749100000	4174100000	3226600000	3627400000	5005700000	5668200000	4760700000	4978200000		Quantified
O08756	3-hydroxyacyl-CoA dehydrogenase type-2	Hsd17b10	FUNCTION: Mitochondrial dehydrogenase that catalyzes the beta-oxidation at position 17 of androgens and estrogens and has 3-alpha-hydroxysteroid dehydrogenase activity with androsterone (By similarity). Catalyzes the third step in the beta-oxidation of fatty acids (By similarity). Carries out oxidative conversions of 7-alpha-OH and 7-beta-OH bile acids (By similarity). Also exhibits 20-beta-OH an…	sp|O08756|HCD2_MOUSE	sp|O08756|HCD2_MOUSE 3-hydroxyacyl-CoA dehydrogenase type-2 OS=Mus musculus OX=10090 GN=Hsd17b10 PE=1 SV=4	1	11	11	11	60.9	27.418	5544900000	4870800000	5481700000	5196000000	4451900000	4759100000	3089100000	5016000000	5450000000	5791600000	7103600000	5169100000		Quantified
O08759	Ubiquitin-protein ligase E3A	Ube3a	FUNCTION: E3 ubiquitin-protein ligase which accepts ubiquitin from an E2 ubiquitin-conjugating enzyme in the form of a thioester and transfers it to its substrates. Several substrates have been identified including the ARNTL/BMAL1, ARC, RAD23A and RAD23B, MCM7 (which is involved in DNA replication), annexin A1, the PML tumor suppressor, and the cell cycle regulator CDKN1B (PubMed:20211139, PubMed…	sp|O08759|UBE3A_MOUSE	sp|O08759|UBE3A_MOUSE Ubiquitin-protein ligase E3A OS=Mus musculus OX=10090 GN=Ube3a PE=1 SV=2	1	9	9	9	12.2	99.818		44860000	34611000	37119000	41003000	27574000	53469000	33941000		42012000	39644000	70775000		Quantified
O08788	Dynactin subunit 1	Dctn1	FUNCTION: Plays a key role in dynein-mediated retrograde transport of vesicles and organelles along microtubules by recruiting and tethering dynein to microtubules. Binds to both dynein and microtubules providing a link between specific cargos, microtubules and dynein. Essential for targeting dynein to microtubule plus ends, recruiting dynein to membranous cargos and enhancing dynein processivity…	sp|O08788|DCTN1_MOUSE	sp|O08788|DCTN1_MOUSE Dynactin subunit 1 OS=Mus musculus OX=10090 GN=Dctn1 PE=1 SV=3	1	23	23	23	22.7	141.67	294600000	219050000	281650000	314540000	70160000	107600000	150490000	234550000	171960000	292890000	266180000	243360000		Quantified
O08848	60 kDa SS-A/Ro ribonucleoprotein	RO60	FUNCTION: RNA-binding protein that binds to misfolded non-coding RNAs, pre-5S rRNA, and several small cytoplasmic RNA molecules known as Y RNAs. May stabilize some of these RNAs and protect them from degradation. {ECO:0000269|PubMed:21289087}.; FUNCTION: May play roles in cilia formation and/or maintenance. {ECO:0000269|PubMed:21289087}.	sp|O08848|RO60_MOUSE	sp|O08848|RO60_MOUSE 60 kDa SS-A/Ro ribonucleoprotein OS=Mus musculus OX=10090 GN=RO60 PE=1 SV=1	1	1	1	1	2	60.123	6051000													Identified
O08917	Flotillin-1	Flot1	FUNCTION: May act as a scaffolding protein within caveolar membranes, functionally participating in formation of caveolae or caveolae-like vesicles.	sp|O08917|FLOT1_MOUSE	sp|O08917|FLOT1_MOUSE Flotillin-1 OS=Mus musculus OX=10090 GN=Flot1 PE=1 SV=1	1	17	17	17	50.7	47.513	649420000	543780000	750840000	784000000	387890000	687520000	343520000	669820000	435900000	542960000	406010000	454880000		Quantified
O09106	Histone deacetylase 1	Hdac1	FUNCTION: Responsible for the deacetylation of lysine residues on the N-terminal part of the core histones (H2A, H2B, H3 and H4). Histone deacetylation gives a tag for epigenetic repression and plays an important role in transcriptional regulation, cell cycle progression and developmental events. Histone deacetylases act via the formation of large multiprotein complexes. Deacetylates SP proteins,…	sp|O09106|HDAC1_MOUSE;sp|P70288|HDAC2_MOUSE	sp|O09106|HDAC1_MOUSE Histone deacetylase 1 OS=Mus musculus OX=10090 GN=Hdac1 PE=1 SV=1	2	3	3	3	8.3	55.074				29594000				45507000				28056000		Identified
O09110	Dual specificity mitogen-activated protein kinase kinase 3	Map2k3	FUNCTION: Dual specificity kinase. Is activated by cytokines and environmental stress in vivo. Catalyzes the concomitant phosphorylation of a threonine and a tyrosine residue in the MAP kinase p38. Part of a signaling cascade that begins with the activation of the adrenergic receptor ADRA1B and leads to the activation of MAPK14. {ECO:0000250|UniProtKB:P46734}.	sp|O09110|MP2K3_MOUSE	sp|O09110|MP2K3_MOUSE Dual specificity mitogen-activated protein kinase kinase 3 OS=Mus musculus OX=10090 GN=Map2k3 PE=1 SV=2	1	4	4	3	12.7	39.296	31245000		37263000	33715000	51246000	43098000	29450000	40802000	45461000	46098000	54675000	39142000		Quantified
O09111	NADH dehydrogenase [ubiquinone] 1 beta subcomplex subunit 11, mitochondrial	Ndufb11	FUNCTION: Accessory subunit of the mitochondrial membrane respiratory chain NADH dehydrogenase (Complex I), that is believed not to be involved in catalysis. Complex I functions in the transfer of electrons from NADH to the respiratory chain. The immediate electron acceptor for the enzyme is believed to be ubiquinone. {ECO:0000250|UniProtKB:Q9NX14}.	sp|O09111|NDUBB_MOUSE	sp|O09111|NDUBB_MOUSE NADH dehydrogenase [ubiquinone] 1 beta subcomplex subunit 11, mitochondrial OS=Mus musculus OX=10090 GN=Ndufb11 PE=1 SV=2	1	3	3	3	30.5	17.444	231540000	269380000	290520000	314240000	307490000	228490000	259240000	298810000	306240000	243260000	382000000	258250000		Quantified
O09161	Calsequestrin-2	Casq2	FUNCTION: Calsequestrin is a high-capacity, moderate affinity, calcium-binding protein and thus acts as an internal calcium store in muscle. Calcium ions are bound by clusters of acidic residues at the protein surface, especially at the interface between subunits. Can bind around 60 Ca(2+) ions. Regulates the release of lumenal Ca(2+) via the calcium release channel RYR2; this plays an important …	sp|O09161|CASQ2_MOUSE	sp|O09161|CASQ2_MOUSE Calsequestrin-2 OS=Mus musculus OX=10090 GN=Casq2 PE=1 SV=3	1	15	15	15	49.9	48.176	10016000000	10496000000	11047000000	9566600000	10171000000	7691700000	8991200000	9530400000	11154000000	9791800000	10036000000	10494000000		Quantified
O09167	60S ribosomal protein L21	Rpl21	FUNCTION: Component of the large ribosomal subunit. {ECO:0000250|UniProtKB:P46778}.	sp|O09167|RL21_MOUSE	sp|O09167|RL21_MOUSE 60S ribosomal protein L21 OS=Mus musculus OX=10090 GN=Rpl21 PE=1 SV=3	1	5	5	5	32.5	18.562	727130000	382850000	462930000	506890000	514460000	785130000	616880000	509170000	474300000	809510000	835780000	758500000		Quantified
O09172	Glutamate--cysteine ligase regulatory subunit	Gclm		sp|O09172|GSH0_MOUSE	sp|O09172|GSH0_MOUSE Glutamate--cysteine ligase regulatory subunit OS=Mus musculus OX=10090 GN=Gclm PE=1 SV=1	1	3	3	3	16.1	30.534		14035000			20647000					18081000	17286000			Quantified
O35129	Prohibitin-2	Phb2	FUNCTION: Acts as a mediator of transcriptional repression by nuclear hormone receptors via recruitment of histone deacetylases (PubMed:12878603, PubMed:15140878). Functions as an estrogen receptor (ER)-selective coregulator that potentiates the inhibitory activities of antiestrogens and represses the activity of estrogens (PubMed:12878603, PubMed:15140878). Competes with NCOA1 for modulation of …	sp|O35129|PHB2_MOUSE	sp|O35129|PHB2_MOUSE Prohibitin-2 OS=Mus musculus OX=10090 GN=Phb2 PE=1 SV=1	1	21	21	21	74.2	33.296	22798000000	17496000000	26434000000	21323000000	11638000000	27923000000	15569000000	30350000000	9963500000	22134000000	12611000000	22359000000		Quantified
O35206	Collagen alpha-1(XV) chain	Col15a1	FUNCTION: Structural protein that stabilizes microvessels and muscle cells, both in heart and in skeletal muscle.; FUNCTION: Restin potently inhibits angiogenesis.	sp|O35206|COFA1_MOUSE	sp|O35206|COFA1_MOUSE Collagen alpha-1(XV) chain OS=Mus musculus OX=10090 GN=Col15a1 PE=1 SV=2	1	5	5	5	4.9	140.47	30536000	32260000	25949000	32767000	15340000	74289000	135710000	15490000	23836000	9132600	32621000	28702000		Quantified
O35226	26S proteasome non-ATPase regulatory subunit 4	Psmd4	FUNCTION: Component of the 26S proteasome, a multiprotein complex involved in the ATP-dependent degradation of ubiquitinated proteins. This complex plays a key role in the maintenance of protein homeostasis by removing misfolded or damaged proteins, which could impair cellular functions, and by removing proteins whose functions are no longer required. Therefore, the proteasome participates in num…	sp|O35226|PSMD4_MOUSE	sp|O35226|PSMD4_MOUSE 26S proteasome non-ATPase regulatory subunit 4 OS=Mus musculus OX=10090 GN=Psmd4 PE=1 SV=1	1	6	6	6	21.5	40.703	55203000		39743000		34409000	29815000		26016000	51096000	41613000	36347000	25990000		Quantified
O35286	Pre-mRNA-splicing factor ATP-dependent RNA helicase DHX15	Dhx15	FUNCTION: Pre-mRNA processing factor involved in disassembly of spliceosomes after the release of mature mRNA. In cooperation with TFIP11 seem to be involved in the transition of the U2, U5 and U6 snRNP-containing IL complex to the snRNP-free IS complex leading to efficient debranching and turnover of excised introns (By similarity). {ECO:0000250}.	sp|O35286|DHX15_MOUSE	sp|O35286|DHX15_MOUSE Pre-mRNA-splicing factor ATP-dependent RNA helicase DHX15 OS=Mus musculus OX=10090 GN=Dhx15 PE=1 SV=2	1	16	16	16	25.9	91.006	295240000	303840000	292580000	332990000	309060000	261850000	299820000	351510000	320170000	320620000	254950000	315180000		Quantified
O35295	Transcriptional activator protein Pur-beta	Purb	FUNCTION: Has capacity to bind repeated elements in single-stranded DNA such as the purine-rich single strand of the PUR element located upstream of the MYC gene. Participates in transcriptional and translational regulation of alpha-MHC expression in cardiac myocytes by binding to the purine-rich negative regulatory (PNR) element. Modulates constitutive liver galectin-3 gene transcription by bind…	sp|O35295|PURB_MOUSE	sp|O35295|PURB_MOUSE Transcriptional activator protein Pur-beta OS=Mus musculus OX=10090 GN=Purb PE=1 SV=3	1	4	4	4	17.9	33.901	126880000	108190000	146200000	210900000	200660000	169080000	100440000	164360000	160720000	146990000	359150000	191120000		Quantified
O35326	Serine/arginine-rich splicing factor 5	Srsf5	FUNCTION: May be required for progression through G1 and entry into S phase of cell growth. May play a regulatory role in pre-mRNA splicing. Autoregulates its own expression. Plays a role in constitutive splicing and can modulate the selection of alternative splice sites (By similarity). {ECO:0000250}.	sp|O35326|SRSF5_MOUSE	sp|O35326|SRSF5_MOUSE Serine/arginine-rich splicing factor 5 OS=Mus musculus OX=10090 GN=Srsf5 PE=1 SV=2	1	2	1	1	8.9	30.891						15043000								Identified
O35345	Importin subunit alpha-7	Kpna6	FUNCTION: Functions in nuclear protein import as an adapter protein for nuclear receptor KPNB1. Binds specifically and directly to substrates containing either a simple or bipartite NLS motif. Docking of the importin/substrate complex to the nuclear pore complex (NPC) is mediated by KPNB1 through binding to nucleoporin FxFG repeats and the complex is subsequently translocated through the pore by …	sp|O35345|IMA7_MOUSE	sp|O35345|IMA7_MOUSE Importin subunit alpha-7 OS=Mus musculus OX=10090 GN=Kpna6 PE=1 SV=2	1	8	8	3	21.6	59.964	120120000	70447000	112810000	86359000	92501000	88498000	67198000	102980000	89641000	92102000	139070000	112370000		Quantified
O35350	Calpain-1 catalytic subunit	Capn1	FUNCTION: Calcium-regulated non-lysosomal thiol-protease which catalyzes limited proteolysis of substrates involved in cytoskeletal remodeling and signal transduction. {ECO:0000250|UniProtKB:P07384}.	sp|O35350|CAN1_MOUSE	sp|O35350|CAN1_MOUSE Calpain-1 catalytic subunit OS=Mus musculus OX=10090 GN=Capn1 PE=1 SV=1	1	11	11	11	17.5	82.105	114940000	113690000	115940000	121920000	114250000	81263000	86596000	121420000	129750000	123750000	151870000	138160000		Quantified
O35379	Multidrug resistance-associated protein 1	Abcc1	FUNCTION: Mediates export of organic anions and drugs from the cytoplasm. Mediates ATP-dependent transport of glutathione and glutathione conjugates, leukotriene C4, estradiol-17-beta-o-glucuronide, methotrexate, antiviral drugs and other xenobiotics. Confers resistance to anticancer drugs by decreasing accumulation of drug in cells, and by mediating ATP- and GSH-dependent drug export (PubMed:928…	sp|O35379|MRP1_MOUSE	sp|O35379|MRP1_MOUSE Multidrug resistance-associated protein 1 OS=Mus musculus OX=10090 GN=Abcc1 PE=1 SV=1	1	2	2	2	1.8	171.18	76145000	201520000	99087000	158860000	79281000	81239000	85732000	115190000	77972000	63700000	72911000	115920000		Quantified
O35382	Exocyst complex component 4	Exoc4	FUNCTION: Component of the exocyst complex involved in the docking of exocytic vesicles with fusion sites on the plasma membrane.	sp|O35382|EXOC4_MOUSE	sp|O35382|EXOC4_MOUSE Exocyst complex component 4 OS=Mus musculus OX=10090 GN=Exoc4 PE=1 SV=2	1	3	3	3	4.3	110.54					7294100	10402000				8533000				Identified
O35387	HCLS1-associated protein X-1	Hax1	FUNCTION: Recruits the Arp2/3 complex to the cell cortex and regulates reorganization of the cortical actin cytoskeleton via its interaction with KCNC3 and the Arp2/3 complex. Slows down the rate of inactivation of KCNC3 channels. Promotes GNA13-mediated cell migration. Involved in the clathrin-mediated endocytosis pathway. May be involved in internalization of ABC transporters such as ABCB11. Ma…	sp|O35387|HAX1_MOUSE	sp|O35387|HAX1_MOUSE HCLS1-associated protein X-1 OS=Mus musculus OX=10090 GN=Hax1 PE=1 SV=1	1	5	5	5	20.7	31.654	26631000	37599000	32706000	48079000	29574000	34266000	35249000	37677000	39669000	36284000	34535000	42058000		Quantified
O35459	Delta(3,5)-Delta(2,4)-dienoyl-CoA isomerase, mitochondrial	Ech1	FUNCTION: Isomerization of 3-trans,5-cis-dienoyl-CoA to 2-trans,4-trans-dienoyl-CoA. {ECO:0000250|UniProtKB:Q62651}.	sp|O35459|ECH1_MOUSE	sp|O35459|ECH1_MOUSE Delta(3,5)-Delta(2,4)-dienoyl-CoA isomerase, mitochondrial OS=Mus musculus OX=10090 GN=Ech1 PE=1 SV=1	1	5	5	5	21.1	36.118	80175000	20367000	69458000	48663000	74315000	58787000	60502000	77385000	77170000	68252000	115270000	45466000		Quantified
O35593	26S proteasome non-ATPase regulatory subunit 14	Psmd14	FUNCTION: Component of the 26S proteasome, a multiprotein complex involved in the ATP-dependent degradation of ubiquitinated proteins. This complex plays a key role in the maintenance of protein homeostasis by removing misfolded or damaged proteins, which could impair cellular functions, and by removing proteins whose functions are no longer required. Therefore, the proteasome participates in num…	sp|O35593|PSDE_MOUSE	sp|O35593|PSDE_MOUSE 26S proteasome non-ATPase regulatory subunit 14 OS=Mus musculus OX=10090 GN=Psmd14 PE=1 SV=2	1	6	6	6	27.7	34.577	309340000	319800000	338970000	283440000	344540000	306960000	294490000	325450000	346600000	397620000	298510000	300960000		Quantified
O35609	Secretory carrier-associated membrane protein 3	Scamp3	FUNCTION: Functions in post-Golgi recycling pathways. Acts as a recycling carrier to the cell surface.	sp|O35609|SCAM3_MOUSE	sp|O35609|SCAM3_MOUSE Secretory carrier-associated membrane protein 3 OS=Mus musculus OX=10090 GN=Scamp3 PE=1 SV=3	1	4	4	4	18.6	38.458	29049000	20234000	29548000	28821000	38438000	24279000	15497000	28872000	18880000	18093000	16927000	20946000		Quantified
O35618	Protein Mdm4	Mdm4	FUNCTION: Inhibits p53/TP53- and TP73/p73-mediated cell cycle arrest and apoptosis by binding its transcriptional activation domain. Inhibits degradation of MDM2. Can reverse MDM2-targeted degradation of TP53 while maintaining suppression of TP53 transactivation and apoptotic functions. The short isoform is a more potent inhibitor of TP53 activity than the long isoform.	sp|O35618|MDM4_MOUSE	sp|O35618|MDM4_MOUSE Protein Mdm4 OS=Mus musculus OX=10090 GN=Mdm4 PE=1 SV=2	1	1	1	1	2	54.963	386240000	300680000	399980000	511480000	649580000	332010000	318350000	410250000	335050000	310810000	404410000	442730000		Quantified
O35643	AP-1 complex subunit beta-1	Ap1b1	FUNCTION: Subunit of clathrin-associated adaptor protein complex 1 that plays a role in protein sorting in the late-Golgi/trans-Golgi network (TGN) and/or endosomes. The AP complexes mediate both the recruitment of clathrin to membranes and the recognition of sorting signals within the cytosolic tails of transmembrane cargo molecules.	sp|O35643|AP1B1_MOUSE	sp|O35643|AP1B1_MOUSE AP-1 complex subunit beta-1 OS=Mus musculus OX=10090 GN=Ap1b1 PE=1 SV=2	1	12	6	6	17.3	103.93	112420000	47385000	74871000	71610000	73524000	101620000	73009000	90718000	90675000	110050000	134760000	75901000		Quantified
O35658	Complement component 1 Q subcomponent-binding protein, mitochondrial	C1qbp	FUNCTION: Is believed to be a multifunctional and multicompartmental protein involved in inflammation and infection processes, ribosome biogenesis, protein synthesis in mitochondria, regulation of apoptosis, transcriptional regulation and pre-mRNA splicing. At the cell surface is thought to act as an endothelial receptor for plasma proteins of the complement and kallikrein-kinin cascades. Putativ…	sp|O35658|C1QBP_MOUSE	sp|O35658|C1QBP_MOUSE Complement component 1 Q subcomponent-binding protein, mitochondrial OS=Mus musculus OX=10090 GN=C1qbp PE=1 SV=1	1	3	3	3	15.1	31.013	224050000	245700000	197440000	138870000	125870000	127250000	201840000	208960000	292720000	160050000	169930000	201280000		Quantified
O35678	Monoglyceride lipase	Mgll	FUNCTION: Converts monoacylglycerides to free fatty acids and glycerol (PubMed:9341166, PubMed:17700715, PubMed:18096503, PubMed:19029917, PubMed:20554061, PubMed:20729846, PubMed:21454566). Hydrolyzes the endocannabinoid 2-arachidonoylglycerol, and thereby contributes to the regulation of endocannabinoid signaling, nociperception and perception of pain (PubMed:9341166, PubMed:17700715, PubMed:18…	sp|O35678|MGLL_MOUSE	sp|O35678|MGLL_MOUSE Monoglyceride lipase OS=Mus musculus OX=10090 GN=Mgll PE=1 SV=1	1	9	9	9	39.3	33.387	523790000	448260000	388780000	394760000	435530000	416980000	570180000	434000000	543380000	323740000	380930000	458800000		Quantified
O35680	28S ribosomal protein S12, mitochondrial	Mrps12		sp|O35680|RT12_MOUSE	sp|O35680|RT12_MOUSE 28S ribosomal protein S12, mitochondrial OS=Mus musculus OX=10090 GN=Mrps12 PE=2 SV=1	1	2	2	2	25.9	15.437	52609000			66581000				33683000		44121000	50618000	62979000		Quantified
O35682	Myeloid-associated differentiation marker	Myadm		sp|O35682|MYADM_MOUSE	sp|O35682|MYADM_MOUSE Myeloid-associated differentiation marker OS=Mus musculus OX=10090 GN=Myadm PE=1 SV=2	1	3	3	3	10.9	35.284	252900000	312250000	121730000	222750000	155590000	179110000	186090000	258950000	223380000	136470000	157990000	433590000		Quantified
O35683	NADH dehydrogenase [ubiquinone] 1 alpha subcomplex subunit 1	Ndufa1	FUNCTION: Accessory subunit of the mitochondrial membrane respiratory chain NADH dehydrogenase (Complex I), that is believed not to be involved in catalysis. Complex I functions in the transfer of electrons from NADH to the respiratory chain. The immediate electron acceptor for the enzyme is believed to be ubiquinone. {ECO:0000250|UniProtKB:O15239}.	sp|O35683|NDUA1_MOUSE	sp|O35683|NDUA1_MOUSE NADH dehydrogenase [ubiquinone] 1 alpha subcomplex subunit 1 OS=Mus musculus OX=10090 GN=Ndufa1 PE=1 SV=1	1	1	1	1	14.3	8.1384		260390000	165250000	267830000	113700000	149870000	268460000	162280000	173330000	156980000	109170000	121310000		Quantified
O35737	Heterogeneous nuclear ribonucleoprotein H	Hnrnph1	FUNCTION: This protein is a component of the heterogeneous nuclear ribonucleoprotein (hnRNP) complexes which provide the substrate for the processing events that pre-mRNAs undergo before becoming functional, translatable mRNAs in the cytoplasm. Mediates pre-mRNA alternative splicing regulation. Inhibits, together with CUGBP1, insulin receptor (IR) pre-mRNA exon 11 inclusion in myoblast. Binds to …	sp|O35737|HNRH1_MOUSE	sp|O35737|HNRH1_MOUSE Heterogeneous nuclear ribonucleoprotein H OS=Mus musculus OX=10090 GN=Hnrnph1 PE=1 SV=3	1	13	13	7	39.4	49.199	1726700000	1812500000	1962200000	1759300000	2119100000	1967100000	1465300000	2099000000	1557700000	1700600000	2354100000	1211500000		Quantified
O35855	Branched-chain-amino-acid aminotransferase, mitochondrial	Bcat2	FUNCTION: Catalyzes the first reaction in the catabolism of the essential branched chain amino acids leucine, isoleucine, and valine. May also function as a transporter of branched chain alpha-keto acids.	sp|O35855|BCAT2_MOUSE	sp|O35855|BCAT2_MOUSE Branched-chain-amino-acid aminotransferase, mitochondrial OS=Mus musculus OX=10090 GN=Bcat2 PE=1 SV=2	1	12	12	12	39.7	44.127	579060000	462990000	543860000	498740000	657750000	607090000	406380000	669510000	558200000	601150000	695480000	1237500000		Quantified
O35857	Mitochondrial import inner membrane translocase subunit TIM44	Timm44	FUNCTION: Essential component of the PAM complex, a complex required for the translocation of transit peptide-containing proteins from the inner membrane into the mitochondrial matrix in an ATP-dependent manner. Recruits mitochondrial HSP70 to drive protein translocation into the matrix using ATP as an energy source. {ECO:0000250|UniProtKB:Q01852}.	sp|O35857|TIM44_MOUSE	sp|O35857|TIM44_MOUSE Mitochondrial import inner membrane translocase subunit TIM44 OS=Mus musculus OX=10090 GN=Timm44 PE=1 SV=2	1	10	10	10	26.8	51.091	262220000	295770000	211110000	256180000	271700000	275240000	195540000	342000000	235850000	194860000	229380000	355410000		Quantified
O35972	39S ribosomal protein L23, mitochondrial	Mrpl23		sp|O35972|RM23_MOUSE	sp|O35972|RM23_MOUSE 39S ribosomal protein L23, mitochondrial OS=Mus musculus OX=10090 GN=Mrpl23 PE=1 SV=1	1	4	4	4	36.3	17.121	391520000	331250000	314470000	516210000	344860000	365910000	357990000	327580000	232350000	250090000	307800000	421130000		Quantified
O54724	Caveolae-associated protein 1	Cavin1	FUNCTION: Plays an important role in caveolae formation and organization. Essential for the formation of caveolae in all tissues (PubMed:18191225, PubMed:18840361, PubMed:18056712, PubMed:30188967). Core component of the CAVIN complex which is essential for recruitment of the complex to the caveolae in presence of calveolin-1 (CAV1) (PubMed:19546242). Essential for normal oligomerization of CAV1 …	sp|O54724|CAVN1_MOUSE	sp|O54724|CAVN1_MOUSE Caveolae-associated protein 1 OS=Mus musculus OX=10090 GN=Cavin1 PE=1 SV=1	1	14	14	14	45.7	43.953	1863900000	1804200000	1777400000	1881000000	1880000000	1852800000	1486100000	2080400000	1877200000	1807600000	1874500000	2302600000		Quantified
O54734	Dolichyl-diphosphooligosaccharide--protein glycosyltransferase 48 kDa subunit	Ddost	FUNCTION: Subunit of the oligosaccharyl transferase (OST) complex that catalyzes the initial transfer of a defined glycan (Glc(3)Man(9)GlcNAc(2) in eukaryotes) from the lipid carrier dolichol-pyrophosphate to an asparagine residue within an Asn-X-Ser/Thr consensus motif in nascent polypeptide chains, the first step in protein N-glycosylation. N-glycosylation occurs cotranslationally and the compl…	sp|O54734|OST48_MOUSE	sp|O54734|OST48_MOUSE Dolichyl-diphosphooligosaccharide--protein glycosyltransferase 48 kDa subunit OS=Mus musculus OX=10090 GN=Ddost PE=1 SV=2	1	6	6	6	16.3	49.027	145820000	146860000	138930000	214260000	167790000	155800000	168020000	199570000	150640000	79940000	156670000	236610000		Quantified
O54774	AP-3 complex subunit delta-1	Ap3d1	FUNCTION: Part of the AP-3 complex, an adaptor-related complex which is not clathrin-associated. The complex is associated with the Golgi region as well as more peripheral structures. It facilitates the budding of vesicles from the Golgi membrane and may be directly involved in trafficking to lysosomes (By similarity). Involved in process of CD8+ T-cell and NK cell degranulation (By similarity). …	sp|O54774|AP3D1_MOUSE	sp|O54774|AP3D1_MOUSE AP-3 complex subunit delta-1 OS=Mus musculus OX=10090 GN=Ap3d1 PE=1 SV=1	1	4	4	4	3.8	135.08	3439200													Identified
O54890	Integrin beta-3	Itgb3	FUNCTION: Integrin alpha-V/beta-3 (ITGAV:ITGB3) is a receptor for cytotactin, fibronectin, laminin, matrix metalloproteinase-2, osteopontin, osteomodulin, prothrombin, thrombospondin, vitronectin and von Willebrand factor. Integrin alpha-IIB/beta-3 (ITGA2B:ITGB3) is a receptor for fibronectin, fibrinogen, plasminogen, prothrombin, thrombospondin and vitronectin. Integrins alpha-IIB/beta-3 and alp…	sp|O54890|ITB3_MOUSE	sp|O54890|ITB3_MOUSE Integrin beta-3 OS=Mus musculus OX=10090 GN=Itgb3 PE=1 SV=2	1	1	1	1	2.5	86.738	55148000	47175000	102020000	58362000	46901000	58749000	45639000	47320000	60561000	51820000				Quantified
O54931	A-kinase anchor protein 2	Akap2	FUNCTION: Binds to regulatory subunit (RII) of protein kinase A. May be involved in establishing polarity in signaling systems or in integrating PKA-RII isoforms with downstream effectors to capture, amplify and focus diffuse, trans-cellular signals carried by cAMP.	sp|O54931|AKAP2_MOUSE	sp|O54931|AKAP2_MOUSE A-kinase anchor protein 2 OS=Mus musculus OX=10090 GN=Akap2 PE=1 SV=3	1	2	2	2	3.2	98.577		11536000							11258000					Identified
O54946	DnaJ homolog subfamily B member 6	Dnajb6	FUNCTION: Plays an indispensable role in the organization of KRT8/KRT18 filaments. Acts as an endogenous molecular chaperone for neuronal proteins including huntingtin. Suppresses aggregation and toxicity of polyglutamine-containing, aggregation-prone proteins (By similarity). Has a stimulatory effect on the ATPase activity of HSP70 in a dose-dependent and time-dependent manner and hence acts as …	sp|O54946|DNJB6_MOUSE;sp|Q9QYI8|DNJB7_MOUSE	sp|O54946|DNJB6_MOUSE DnaJ homolog subfamily B member 6 OS=Mus musculus OX=10090 GN=Dnajb6 PE=1 SV=4	2	4	4	3	14	39.807	76622000	83308000	94441000	79183000	56011000	77508000	48906000	69073000	73086000	94571000	98180000	60105000		Quantified
O54950	5-AMP-activated protein kinase subunit gamma-1	Prkag1	FUNCTION: AMP/ATP-binding subunit of AMP-activated protein kinase (AMPK), an energy sensor protein kinase that plays a key role in regulating cellular energy metabolism. In response to reduction of intracellular ATP levels, AMPK activates energy-producing pathways and inhibits energy-consuming processes: inhibits protein, carbohydrate and lipid biosynthesis, as well as cell growth and proliferati…	sp|O54950|AAKG1_MOUSE;sp|Q91WG5|AAKG2_MOUSE	sp|O54950|AAKG1_MOUSE 5-AMP-activated protein kinase subunit gamma-1 OS=Mus musculus OX=10090 GN=Prkag1 PE=1 SV=2	2	10	10	10	35.2	37.52	186640000	155070000	211920000	216750000	160100000	184560000	97115000	198690000	217100000	289360000	297710000	163380000		Quantified
O54988	STE20-like serine/threonine-protein kinase	Slk	FUNCTION: Mediates apoptosis and actin stress fiber dissolution. {ECO:0000269|PubMed:10611247}.	sp|O54988|SLK_MOUSE	sp|O54988|SLK_MOUSE STE20-like serine/threonine-protein kinase OS=Mus musculus OX=10090 GN=Slk PE=1 SV=2	1	3	3	3	2.5	141.46	68081000	88201000	111270000	74477000	76313000	78117000	78959000	81779000	110180000	70853000		99422000		Quantified
O55023	Inositol monophosphatase 1	Impa1	FUNCTION: Responsible for the provision of inositol required for synthesis of phosphatidylinositol and polyphosphoinositides and has been implicated as the pharmacological target for lithium action in brain. Has broad substrate specificity and can use myo-inositol monophosphates, myo-inositol 1,3-diphosphate, myo-inositol 1,4-diphosphate, scyllo-inositol-phosphate, D-galactose 1-phosphate, glucos…	sp|O55023|IMPA1_MOUSE	sp|O55023|IMPA1_MOUSE Inositol monophosphatase 1 OS=Mus musculus OX=10090 GN=Impa1 PE=1 SV=1	1	3	3	3	10.8	30.436									12256000					Identified
O55028	[3-methyl-2-oxobutanoate dehydrogenase [lipoamide]] kinase, mitochondrial	Bckdk	FUNCTION: Catalyzes the phosphorylation and inactivation of the branched-chain alpha-ketoacid dehydrogenase complex, the key regulatory enzyme of the valine, leucine and isoleucine catabolic pathways. Key enzyme that regulate the activity state of the BCKD complex. {ECO:0000250|UniProtKB:O14874}.	sp|O55028|BCKD_MOUSE	sp|O55028|BCKD_MOUSE [3-methyl-2-oxobutanoate dehydrogenase [lipoamide]] kinase, mitochondrial OS=Mus musculus OX=10090 GN=Bckdk PE=1 SV=1	1	10	10	10	31.8	46.587	638050000	610160000	586010000	524020000	636090000	558890000	553480000	631980000	596470000	604190000	641870000	618060000		Quantified
O55029	Coatomer subunit beta	Copb2	FUNCTION: The coatomer is a cytosolic protein complex that binds to dilysine motifs and reversibly associates with Golgi non-clathrin-coated vesicles, which further mediate biosynthetic protein transport from the ER, via the Golgi up to the trans Golgi network. Coatomer complex is required for budding from Golgi membranes, and is essential for the retrograde Golgi-to-ER transport of dilysine-tagg…	sp|O55029|COPB2_MOUSE	sp|O55029|COPB2_MOUSE Coatomer subunit beta OS=Mus musculus OX=10090 GN=Copb2 PE=1 SV=2	1	3	3	3	6.1	102.45					10856000		12102000					18543000		Quantified
O55101	Synaptogyrin-2	Syngr2	FUNCTION: May play a role in regulated exocytosis. In neuronal cells, modulates the localization of synaptophysin/SYP into synaptic-like microvesicles and may therefore play a role in the formation and/or the maturation of this vesicles. May also play a role in GLUT4 storage and transport to the plasma membrane. {ECO:0000250|UniProtKB:O54980}.	sp|O55101|SNG2_MOUSE	sp|O55101|SNG2_MOUSE Synaptogyrin-2 OS=Mus musculus OX=10090 GN=Syngr2 PE=2 SV=1	1	2	2	2	12.5	24.778	32590000			18205000			28706000					48372000		Identified
O55111	Desmoglein-2	Dsg2	FUNCTION: Component of intercellular desmosome junctions. Involved in the interaction of plaque proteins and intermediate filaments mediating cell-cell adhesion.	sp|O55111|DSG2_MOUSE	sp|O55111|DSG2_MOUSE Desmoglein-2 OS=Mus musculus OX=10090 GN=Dsg2 PE=1 SV=3	1	2	2	2	2.4	122.38						4247300					4808700			Identified
O55126	Protein NipSnap homolog 2	Nipsnap2	FUNCTION: May act as a positive regulator of L-type calcium channels. {ECO:0000269|PubMed:22627147}.	sp|O55126|NIPS2_MOUSE	sp|O55126|NIPS2_MOUSE Protein NipSnap homolog 2 OS=Mus musculus OX=10090 GN=Nipsnap2 PE=1 SV=1	1	11	11	11	43.8	32.932	4880600000	4124200000	4320000000	5010000000	3807700000	4593400000	4257200000	4128800000	5244900000	5189100000	4678700000	5634100000		Quantified
O55128	Histone deacetylase complex subunit SAP18	Sap18	FUNCTION: Component of the SIN3-repressing complex. Enhances the ability of SIN3-HDAC1-mediated transcriptional repression. When tethered to the promoter, it can direct the formation of a repressive complex to core histone proteins. Auxiliary component of the splicing-dependent multiprotein exon junction complex (EJC) deposited at splice junction on mRNAs. The EJC is a dynamic structure consistin…	sp|O55128|SAP18_MOUSE	sp|O55128|SAP18_MOUSE Histone deacetylase complex subunit SAP18 OS=Mus musculus OX=10090 GN=Sap18 PE=1 SV=1	1	1	1	1	10.5	17.595				45307000								49671000		Identified
O55142	60S ribosomal protein L35a	Rpl35a	FUNCTION: Required for the proliferation and viability of hematopoietic cells. Plays a role in 60S ribosomal subunit formation. The protein was found to bind to both initiator and elongator tRNAs and consequently was assigned to the P site or P and A site. {ECO:0000250}.	sp|O55142|RL35A_MOUSE	sp|O55142|RL35A_MOUSE 60S ribosomal protein L35a OS=Mus musculus OX=10090 GN=Rpl35a PE=1 SV=2	1	6	6	6	38.2	12.554	1672400000	1104900000	1253200000	1446300000	1180300000	1265800000	1077500000	1176800000	1367800000	1277500000	959600000	1572200000		Quantified
O55143	Sarcoplasmic/endoplasmic reticulum calcium ATPase 2	Atp2a2	FUNCTION: This magnesium-dependent enzyme catalyzes the hydrolysis of ATP coupled with the translocation of calcium from the cytosol to the sarcoplasmic reticulum lumen. Isoform SERCA2A is involved in the regulation of the contraction/relaxation cycle. Acts as a regulator of TNFSF11-mediated Ca(2+) signaling pathways via its interaction with TMEM64 which is critical for the TNFSF11-induced CREB1 …	sp|O55143|AT2A2_MOUSE;sp|Q8R429|AT2A1_MOUSE	sp|O55143|AT2A2_MOUSE Sarcoplasmic/endoplasmic reticulum calcium ATPase 2 OS=Mus musculus OX=10090 GN=Atp2a2 PE=1 SV=2	2	56	56	48	54.4	114.86	218460000000	208590000000	214890000000	246810000000	214580000000	223510000000	170040000000	206910000000	206980000000	192500000000	205610000000	193300000000		Quantified
O55222	Integrin-linked protein kinase	Ilk	FUNCTION: Receptor-proximal protein kinase regulating integrin-mediated signal transduction. May act as a mediator of inside-out integrin signaling. Focal adhesion protein part of the complex ILK-PINCH. This complex is considered to be one of the convergence points of integrin- and growth factor-signaling pathway. Could be implicated in mediating cell architecture, adhesion to integrin substrates…	sp|O55222|ILK_MOUSE	sp|O55222|ILK_MOUSE Integrin-linked protein kinase OS=Mus musculus OX=10090 GN=Ilk PE=1 SV=2	1	18	18	18	43.6	51.373	1227000000	945350000	914440000	1164800000	1066700000	1011800000	727610000	1056800000	1206700000	1242200000	1231900000	1388600000		Quantified
O70133	ATP-dependent RNA helicase A	Dhx9	FUNCTION: Multifunctional ATP-dependent nucleic acid helicase that unwinds DNA and RNA in a 3' to 5' direction and that plays important roles in many processes, such as DNA replication, transcriptional activation, post-transcriptional RNA regulation, mRNA translation and RNA-mediated gene silencing. Requires a 3'-single-stranded tail as entry site for acid nuclei unwinding activities as well as t…	sp|O70133|DHX9_MOUSE	sp|O70133|DHX9_MOUSE ATP-dependent RNA helicase A OS=Mus musculus OX=10090 GN=Dhx9 PE=1 SV=2	1	20	20	20	17.9	149.47	806140000	564260000	649640000	735870000	663400000	720090000	547540000	745340000	367190000	635540000	574510000	503110000		Quantified
O70152	Dolichol-phosphate mannosyltransferase subunit 1	Dpm1	FUNCTION: Transfers mannose from GDP-mannose to dolichol monophosphate to form dolichol phosphate mannose (Dol-P-Man) which is the mannosyl donor in pathways leading to N-glycosylation, glycosyl phosphatidylinositol membrane anchoring, and O-mannosylation of proteins; catalytic subunit of the dolichol-phosphate mannose (DPM) synthase complex. {ECO:0000250}.	sp|O70152|DPM1_MOUSE	sp|O70152|DPM1_MOUSE Dolichol-phosphate mannosyltransferase subunit 1 OS=Mus musculus OX=10090 GN=Dpm1 PE=1 SV=1	1	4	4	4	18.5	29.174				16620000			33628000	14514000			52540000			Identified
O70194	Eukaryotic translation initiation factor 3 subunit D	Eif3d	FUNCTION: mRNA cap-binding component of the eukaryotic translation initiation factor 3 (eIF-3) complex, a complex required for several steps in the initiation of protein synthesis of a specialized repertoire of mRNAs. The eIF-3 complex associates with the 40S ribosome and facilitates the recruitment of eIF-1, eIF-1A, eIF-2:GTP:methionyl-tRNAi and eIF-5 to form the 43S pre-initiation complex (43S …	sp|O70194|EIF3D_MOUSE	sp|O70194|EIF3D_MOUSE Eukaryotic translation initiation factor 3 subunit D OS=Mus musculus OX=10090 GN=Eif3d PE=1 SV=2	1	11	11	11	27.7	63.988	204280000	184080000	194300000	224410000	201280000	176860000	195650000	186890000	215620000	158000000	228610000	244090000		Quantified
O70228	Probable phospholipid-transporting ATPase IIA	Atp9a		sp|O70228|ATP9A_MOUSE;sp|P98195|ATP9B_MOUSE	sp|O70228|ATP9A_MOUSE Probable phospholipid-transporting ATPase IIA OS=Mus musculus OX=10090 GN=Atp9a PE=1 SV=3;sp|P98195|ATP9B_MOUSE Probable phospholipid-transporting ATPase IIB OS=Mus musculus OX=10090 GN=Atp9b PE=1 SV=4	2	1	1	1	1.1	118.61														Identified
O70251	Elongation factor 1-beta	Eef1b	FUNCTION: EF-1-beta and EF-1-delta stimulate the exchange of GDP bound to EF-1-alpha to GTP. {ECO:0000250}.	sp|O70251|EF1B_MOUSE	sp|O70251|EF1B_MOUSE Elongation factor 1-beta OS=Mus musculus OX=10090 GN=Eef1b PE=1 SV=5	1	5	4	4	33.3	24.693	98293000	95074000	129870000	143600000	107210000	131130000	98764000	182220000	145370000	144420000	107580000	152240000		Quantified
O70252	Heme oxygenase 2	Hmox2	FUNCTION: Heme oxygenase cleaves the heme ring at the alpha methene bridge to form biliverdin. Biliverdin is subsequently converted to bilirubin by biliverdin reductase. Under physiological conditions, the activity of heme oxygenase is highest in the spleen, where senescent erythrocytes are sequestrated and destroyed. Heme oxygenase 2 could be implicated in the production of carbon monoxide in br…	sp|O70252|HMOX2_MOUSE	sp|O70252|HMOX2_MOUSE Heme oxygenase 2 OS=Mus musculus OX=10090 GN=Hmox2 PE=1 SV=1	1	3	3	3	14.9	35.738	67592000	58128000	67170000	59582000	65525000	66305000	50773000	65254000	51510000	79910000	92360000	52197000		Quantified
O70318	Band 4.1-like protein 2	Epb41l2	FUNCTION: Required for dynein-dynactin complex and NUMA1 recruitment at the mitotic cell cortex during anaphase. {ECO:0000250|UniProtKB:O43491}.	sp|O70318|E41L2_MOUSE;sp|Q9Z2H5|E41L1_MOUSE	sp|O70318|E41L2_MOUSE Band 4.1-like protein 2 OS=Mus musculus OX=10090 GN=Epb41l2 PE=1 SV=2	2	9	8	6	11.7	109.94	60162000	53857000	66454000	55455000	33205000	48679000	73926000	62526000	53012000	53347000	57016000	73001000		Quantified
O70325	Phospholipid hydroperoxide glutathione peroxidase	Gpx4	FUNCTION: Essential antioxidant peroxidase that directly reduces phospholipid hydroperoxide even if they are incorporated in membranes and lipoproteins (PubMed:29290465). Can also reduce fatty acid hydroperoxide, cholesterol hydroperoxide and thymine hydroperoxide (By similarity). Plays a key role in protecting cells from oxidative damage by preventing membrane lipid peroxidation (PubMed:12566075…	sp|O70325|GPX4_MOUSE	sp|O70325|GPX4_MOUSE Phospholipid hydroperoxide glutathione peroxidase OS=Mus musculus OX=10090 GN=Gpx4 PE=1 SV=4	1	8	8	8	44.7	22.228	220360000	234990000	246180000	249880000	254950000	237520000	229240000	246720000	305700000	274500000	296610000	232270000		Quantified
O70373	Xin actin-binding repeat-containing protein 1	Xirp1	FUNCTION: Protects actin filaments from depolymerization. {ECO:0000250}.	sp|O70373|XIRP1_MOUSE	sp|O70373|XIRP1_MOUSE Xin actin-binding repeat-containing protein 1 OS=Mus musculus OX=10090 GN=Xirp1 PE=1 SV=2	1	10	10	10	10.3	123.43	26727000				34858000	29972000	218300000		26619000	30856000	66641000			Quantified
O70400	PDZ and LIM domain protein 1	Pdlim1	FUNCTION: Cytoskeletal protein that may act as an adapter that brings other proteins (like kinases) to the cytoskeleton (By similarity). Involved in assembly, disassembly and directioning of stress fibers in fibroblasts. Required for the localization of ACTN1 and PALLD to stress fibers. Required for cell migration and in maintaining cell polarity of fibroblasts (By similarity). {ECO:0000250|UniPr…	sp|O70400|PDLI1_MOUSE	sp|O70400|PDLI1_MOUSE PDZ and LIM domain protein 1 OS=Mus musculus OX=10090 GN=Pdlim1 PE=1 SV=4	1	2	2	2	6.7	35.774	8461100						8422500							Identified
O70433	Four and a half LIM domains protein 2	Fhl2	FUNCTION: May function as a molecular transmitter linking various signaling pathways to transcriptional regulation. Negatively regulates the transcriptional repressor E4F1 and may function in cell growth. Inhibits the transcriptional activity of FOXO1 and its apoptotic function by enhancing the interaction of FOXO1 with SIRT1 and FOXO1 deacetylation (By similarity). Negatively regulates the calci…	sp|O70433|FHL2_MOUSE	sp|O70433|FHL2_MOUSE Four and a half LIM domains protein 2 OS=Mus musculus OX=10090 GN=Fhl2 PE=1 SV=1	1	19	19	19	81.7	32.072	2793300000	3375800000	3355700000	2705100000	3196000000	3273300000	2587500000	2826900000	2644100000	2804600000	2799700000	3319600000		Quantified
O70468	Myosin-binding protein C, cardiac-type	Mybpc3	FUNCTION: Thick filament-associated protein located in the crossbridge region of vertebrate striated muscle a bands. In vitro it binds MHC, F-actin and native thin filaments, and modifies the activity of actin-activated myosin ATPase. It may modulate muscle contraction or may play a more structural role.	sp|O70468|MYPC3_MOUSE;sp|Q5XKE0|MYPC2_MOUSE	sp|O70468|MYPC3_MOUSE Myosin-binding protein C, cardiac-type OS=Mus musculus OX=10090 GN=Mybpc3 PE=1 SV=1	2	75	75	75	69.1	140.63	138170000000	130750000000	142880000000	133800000000	134920000000	121630000000	118000000000	151080000000	141170000000	117910000000	140710000000	129100000000		Quantified
O70475	UDP-glucose 6-dehydrogenase	Ugdh	FUNCTION: Catalyzes the formation of UDP-alpha-D-glucuronate, a constituent of complex glycosaminoglycans (PubMed:9737970). Required for the biosynthesis of chondroitin sulfate and heparan sulfate. Required for embryonic development via its role in the biosynthesis of glycosaminoglycans (PubMed:14505572). {ECO:0000269|PubMed:14505572, ECO:0000269|PubMed:9737970}.	sp|O70475|UGDH_MOUSE	sp|O70475|UGDH_MOUSE UDP-glucose 6-dehydrogenase OS=Mus musculus OX=10090 GN=Ugdh PE=1 SV=1	1	1	1	1	2.8	54.831											5224400			Identified
O70503	Very-long-chain 3-oxoacyl-CoA reductase	Hsd17b12	FUNCTION: Catalyzes the second of the four reactions of the long-chain fatty acids elongation cycle. This endoplasmic reticulum-bound enzymatic process, allows the addition of two carbons to the chain of long- and very long-chain fatty acids/VLCFAs per cycle. This enzyme has a 3-ketoacyl-CoA reductase activity, reducing 3-ketoacyl-CoA to 3-hydroxyacyl-CoA, within each cycle of fatty acid elongati…	sp|O70503|DHB12_MOUSE	sp|O70503|DHB12_MOUSE Very-long-chain 3-oxoacyl-CoA reductase OS=Mus musculus OX=10090 GN=Hsd17b12 PE=1 SV=1	1	6	6	6	26	34.741	143920000	99652000	46080000	195090000	163970000	150480000	118660000	153190000	71550000	126580000	174810000	190110000		Quantified
O70548	Telethonin	Tcap	FUNCTION: Muscle assembly regulating factor. Mediates the antiparallel assembly of titin (TTN) molecules at the sarcomeric Z-disk (By similarity). {ECO:0000250}.	sp|O70548|TELT_MOUSE	sp|O70548|TELT_MOUSE Telethonin OS=Mus musculus OX=10090 GN=Tcap PE=1 SV=1	1	5	5	5	36.5	19.077	71294000	56894000	74234000	88099000	54838000	62734000	59978000	51034000	51838000	51638000				Quantified
O70571	[Pyruvate dehydrogenase (acetyl-transferring)] kinase isozyme 4, mitochondrial	Pdk4	FUNCTION: Kinase that plays a key role in regulation of glucose and fatty acid metabolism and homeostasis via phosphorylation of the pyruvate dehydrogenase subunits PDHA1 and PDHA2. This inhibits pyruvate dehydrogenase activity, and thereby regulates metabolite flux through the tricarboxylic acid cycle, down-regulates aerobic respiration and inhibits the formation of acetyl-coenzyme A from pyruva…	sp|O70571|PDK4_MOUSE	sp|O70571|PDK4_MOUSE [Pyruvate dehydrogenase (acetyl-transferring)] kinase isozyme 4, mitochondrial OS=Mus musculus OX=10090 GN=Pdk4 PE=1 SV=1	1	14	14	14	48.3	46.596	550850000	484570000	469280000	716440000	463890000	362930000	329670000	573920000	664500000	716770000	516190000	220500000		Quantified
O70572	Sphingomyelin phosphodiesterase 2	Smpd2	FUNCTION: Converts sphingomyelin to ceramide. Hydrolyze 1-acyl-2-lyso-sn-glycero-3-phosphocholine (lyso-PC) and 1-O-alkyl-2-lyso-sn-glycero-3-phosphocholine (lyso-platelet-activating factor). The physiological substrate seems to be Lyso-PAF (By similarity). {ECO:0000250}.	sp|O70572|NSMA_MOUSE	sp|O70572|NSMA_MOUSE Sphingomyelin phosphodiesterase 2 OS=Mus musculus OX=10090 GN=Smpd2 PE=1 SV=1	1	5	5	5	14.6	47.466		15924000	19552000				21825000	15404000	21472000	19142000	19171000	28934000		Quantified
O70622	Reticulon-2	Rtn2		sp|O70622|RTN2_MOUSE	sp|O70622|RTN2_MOUSE Reticulon-2 OS=Mus musculus OX=10090 GN=Rtn2 PE=1 SV=1	1	2	2	2	7.2	51.346	77377000	104720000	82074000	158210000	80187000	65583000	81559000	97262000	97661000	101180000	102920000	94557000		Quantified
O88207	Collagen alpha-1(V) chain	Col5a1	FUNCTION: Type V collagen is a member of group I collagen (fibrillar forming collagen). It is a minor connective tissue component of nearly ubiquitous distribution. Type V collagen binds to DNA, heparan sulfate, thrombospondin, heparin, and insulin (By similarity). Transcriptionally activated by CEBPZ, which recognizes a CCAAT-like motif, CAAAT in the COL5A1 promoter. {ECO:0000250, ECO:0000269|Pu…	sp|O88207|CO5A1_MOUSE	sp|O88207|CO5A1_MOUSE Collagen alpha-1(V) chain OS=Mus musculus OX=10090 GN=Col5a1 PE=1 SV=2	1	3	3	3	2.6	183.67	29349000	24250000		19256000	20050000	30978000	42682000	21707000			20205000	31695000		Quantified
O88327	Alpha-catulin	Ctnnal1	FUNCTION: May modulate the Rho pathway signaling by providing a scaffold for the Lbc Rho guanine nucleotide exchange factor (ARHGEF1). {ECO:0000250}.	sp|O88327|CTNL1_MOUSE	sp|O88327|CTNL1_MOUSE Alpha-catulin OS=Mus musculus OX=10090 GN=Ctnnal1 PE=1 SV=1	1	1	1	1	2.1	81.462	1159900000	2026500000	492820000	1454100000	1050700000	2908900000	2141000000	2976500000		1109900000	1940200000	2506200000		Quantified
O88342	WD repeat-containing protein 1	Wdr1	FUNCTION: Induces disassembly of actin filaments in conjunction with ADF/cofilin family proteins (By similarity). Enhances cofilin-mediated actin severing (PubMed:25915128). Involved in cytokinesis. Involved in chemotactic cell migration by restricting lamellipodial membrane protrusions (By similarity). Involved in myocardium sarcomere organization. Required for cardiomyocyte growth at the postna…	sp|O88342|WDR1_MOUSE	sp|O88342|WDR1_MOUSE WD repeat-containing protein 1 OS=Mus musculus OX=10090 GN=Wdr1 PE=1 SV=3	1	3	3	3	8.4	66.406												13322000		Identified
O88398	Advillin	Avil	FUNCTION: Ca(2+)-regulated actin-binding protein which plays an important role in actin bundling. May have a unique function in the morphogenesis of neuronal cells which form ganglia. Required for SREC1-mediated regulation of neurite-like outgrowth. Plays a role in regenerative sensory axon outgrowth and remodeling processes after peripheral injury in neonates. Involved in the formation of long f…	sp|O88398|AVIL_MOUSE	sp|O88398|AVIL_MOUSE Advillin OS=Mus musculus OX=10090 GN=Avil PE=1 SV=2	1	1	1	1	2	92.031				12633000			8834800					20272000		Identified
O88413	Tubby-related protein 3	Tulp3	FUNCTION: Negative regulator of the Shh signaling transduction pathway: recruited to primary cilia via association with the IFT complex A (IFT-A) and is required for recruitment of G protein-coupled receptor GPR161 to cilia, a promoter of PKA-dependent basal repression machinery in Shh signaling. Binds to phosphorylated inositide (phosphoinositide) lipids. Both IFT-A- and phosphoinositide-binding…	sp|O88413|TULP3_MOUSE	sp|O88413|TULP3_MOUSE Tubby-related protein 3 OS=Mus musculus OX=10090 GN=Tulp3 PE=1 SV=1	1	1	1	1	2	51.23	406940000	429630000	630830000	113020000	572170000	418820000	473230000	405900000	791930000	714880000	372860000	623530000		Quantified
O88441	Metaxin-2	Mtx2	FUNCTION: Involved in transport of proteins into the mitochondrion. {ECO:0000269|PubMed:10381257}.	sp|O88441|MTX2_MOUSE	sp|O88441|MTX2_MOUSE Metaxin-2 OS=Mus musculus OX=10090 GN=Mtx2 PE=1 SV=1	1	7	7	7	33.1	29.758	952980000	803170000	977380000	1131200000	1018400000	983070000	628840000	1040000000	726180000	770040000	789900000	770770000		Quantified
O88492	Perilipin-4	Plin4	FUNCTION: May play a role in triacylglycerol packaging into adipocytes. May function as a coat protein involved in the biogenesis of lipid droplets. {ECO:0000269|PubMed:12840023, ECO:0000269|PubMed:15731108}.	sp|O88492|PLIN4_MOUSE	sp|O88492|PLIN4_MOUSE Perilipin-4 OS=Mus musculus OX=10090 GN=Plin4 PE=1 SV=2	1	35	35	35	67	139.41	3227800000	2815900000	2188000000	2910700000	2917100000	2139100000	3964800000	3438000000	2651900000	2847600000	2432800000	1632400000		Quantified
O88544	COP9 signalosome complex subunit 4	Cops4	FUNCTION: Component of the COP9 signalosome complex (CSN), a complex involved in various cellular and developmental processes (By similarity). The CSN complex is an essential regulator of the ubiquitin (Ubl) conjugation pathway by mediating the deneddylation of the cullin subunits of SCF-type E3 ligase complexes, leading to decrease the Ubl ligase activity of SCF-type complexes such as SCF, CSA o…	sp|O88544|CSN4_MOUSE	sp|O88544|CSN4_MOUSE COP9 signalosome complex subunit 4 OS=Mus musculus OX=10090 GN=Cops4 PE=1 SV=1	1	4	4	4	11.1	46.284	48838000	52051000	71315000	50344000	97538000	88427000	115000000	96651000	57312000	112740000	64987000			Quantified
O88545	COP9 signalosome complex subunit 6	Cops6	FUNCTION: Component of the COP9 signalosome complex (CSN), a complex involved in various cellular and developmental processes (By similarity). The CSN complex is an essential regulator of the ubiquitin (Ubl) conjugation pathway by mediating the deneddylation of the cullin subunits of SCF-type E3 ligase complexes, leading to decrease the Ubl ligase activity of SCF-type complexes such as SCF, CSA o…	sp|O88545|CSN6_MOUSE	sp|O88545|CSN6_MOUSE COP9 signalosome complex subunit 6 OS=Mus musculus OX=10090 GN=Cops6 PE=1 SV=1	1	1	1	1	3.4	35.88			11454000	8070000		4413000			10484000	8773600	10355000			Quantified
O88569	Heterogeneous nuclear ribonucleoproteins A2/B1	Hnrnpa2b1	FUNCTION: Heterogeneous nuclear ribonucleoprotein (hnRNP) that associates with nascent pre-mRNAs, packaging them into hnRNP particles. The hnRNP particle arrangement on nascent hnRNA is non-random and sequence-dependent and serves to condense and stabilize the transcripts and minimize tangling and knotting. Packaging plays a role in various processes such as transcription, pre-mRNA processing, RN…	sp|O88569|ROA2_MOUSE	sp|O88569|ROA2_MOUSE Heterogeneous nuclear ribonucleoproteins A2/B1 OS=Mus musculus OX=10090 GN=Hnrnpa2b1 PE=1 SV=2	1	12	12	11	40.5	37.402	524670000	539770000	425060000	719970000	588960000	578960000	414400000	552910000	466110000	490220000	688850000	610280000		Quantified
O88587	Catechol O-methyltransferase	Comt	FUNCTION: Catalyzes the O-methylation, and thereby the inactivation, of catecholamine neurotransmitters and catechol hormones. Also shortens the biological half-lives of certain neuroactive drugs, like L-DOPA, alpha-methyl DOPA and isoproterenol. {ECO:0000269|PubMed:18794526}.	sp|O88587|COMT_MOUSE	sp|O88587|COMT_MOUSE Catechol O-methyltransferase OS=Mus musculus OX=10090 GN=Comt PE=1 SV=2	1	9	9	9	53.2	29.486	465810000	432510000	519320000	491590000	573300000	487760000	452680000	482070000	552900000	408540000	709700000	507280000		Quantified
O88623	Ubiquitin carboxyl-terminal hydrolase 2	Usp2	FUNCTION: Hydrolase that deubiquitinates polyubiquitinated target proteins such as MDM2, MDM4 and CCND1 (By similarity). Isoform 1 and isoform 2 possess both ubiquitin-specific peptidase and isopeptidase activities (By similarity). Deubiquitinates MDM2 without reversing MDM2-mediated p53/TP53 ubiquitination and thus indirectly promotes p53/TP53 degradation and limits p53 activity (By similarity).…	sp|O88623|UBP2_MOUSE	sp|O88623|UBP2_MOUSE Ubiquitin carboxyl-terminal hydrolase 2 OS=Mus musculus OX=10090 GN=Usp2 PE=1 SV=2	1	2	2	2	3.6	68.845														Identified
O88667	GTP-binding protein RAD	Rrad	FUNCTION: May play an important role in cardiac antiarrhythmia via the strong suppression of voltage-gated L-type Ca(2+) currents. Regulates voltage-dependent L-type calcium channel subunit alpha-1C trafficking to the cell membrane. Inhibits cardiac hypertrophy through the calmodulin-dependent kinase II (CaMKII) pathway. Inhibits phosphorylation and activation of CAMK2D. {ECO:0000269|PubMed:17525…	sp|O88667|RAD_MOUSE	sp|O88667|RAD_MOUSE GTP-binding protein RAD OS=Mus musculus OX=10090 GN=Rrad PE=1 SV=1	1	2	2	2	9.7	33.279	23209000	68536000	47582000	51624000	46506000	53843000	28310000	57882000	27080000	73257000	71005000	37156000		Quantified
O88685	26S proteasome regulatory subunit 6A	Psmc3	FUNCTION: Component of the 26S proteasome, a multiprotein complex involved in the ATP-dependent degradation of ubiquitinated proteins. This complex plays a key role in the maintenance of protein homeostasis by removing misfolded or damaged proteins, which could impair cellular functions, and by removing proteins whose functions are no longer required. Therefore, the proteasome participates in num…	sp|O88685|PRS6A_MOUSE	sp|O88685|PRS6A_MOUSE 26S proteasome regulatory subunit 6A OS=Mus musculus OX=10090 GN=Psmc3 PE=1 SV=2	1	9	9	9	30.3	49.548	305170000	312800000	298330000	332010000	277620000	271670000	190090000	280150000	325070000	293180000	389090000	295290000		Quantified
O88696	ATP-dependent Clp protease proteolytic subunit, mitochondrial	Clpp	FUNCTION: Protease component of the Clp complex that cleaves peptides and various proteins in an ATP-dependent process. Has low peptidase activity in the absence of CLPX. The Clp complex can degrade CSN1S1, CSN2 and CSN3, as well as synthetic peptides (in vitro) and may be responsible for a fairly general and central housekeeping function rather than for the degradation of specific substrates. Cl…	sp|O88696|CLPP_MOUSE	sp|O88696|CLPP_MOUSE ATP-dependent Clp protease proteolytic subunit, mitochondrial OS=Mus musculus OX=10090 GN=Clpp PE=1 SV=1	1	9	9	9	39.7	29.8	480170000	428420000	444010000	377700000	423720000	453860000	273350000	384910000	330810000	544070000	509470000	645120000		Quantified
O88712	C-terminal-binding protein 1	Ctbp1	FUNCTION: Corepressor targeting diverse transcription regulators such as GLIS2 or BCL6. Has dehydrogenase activity. Involved in controlling the equilibrium between tubular and stacked structures in the Golgi complex. Functions in brown adipose tissue (BAT) differentiation. {ECO:0000269|PubMed:10369679, ECO:0000269|PubMed:10567582, ECO:0000269|PubMed:16326862, ECO:0000269|PubMed:18483224, ECO:0000…	sp|O88712|CTBP1_MOUSE	sp|O88712|CTBP1_MOUSE C-terminal-binding protein 1 OS=Mus musculus OX=10090 GN=Ctbp1 PE=1 SV=2	1	10	10	6	30.4	47.744	204810000	139890000	192320000	145240000	184420000	159720000	146460000	176970000	180350000	236080000	166040000	149060000		Quantified
O88736	3-keto-steroid reductase/17-beta-hydroxysteroid dehydrogenase 7	Hsd17b7	FUNCTION: Responsible for the reduction of the keto group on the C-3 of sterols.	sp|O88736|DHB7_MOUSE	sp|O88736|DHB7_MOUSE 3-keto-steroid reductase/17-beta-hydroxysteroid dehydrogenase 7 OS=Mus musculus OX=10090 GN=Hsd17b7 PE=1 SV=1	1	3	3	3	11.7	37.316	102170000	74305000	81589000	40145000	35869000		49429000	71438000	53735000		62632000	117500000		Quantified
O88844	Isocitrate dehydrogenase [NADP] cytoplasmic	Idh1		sp|O88844|IDHC_MOUSE	sp|O88844|IDHC_MOUSE Isocitrate dehydrogenase [NADP] cytoplasmic OS=Mus musculus OX=10090 GN=Idh1 PE=1 SV=2	1	13	11	11	32.4	46.674	169970000	196650000	226990000	176930000	201760000	187580000	170090000	177570000	241200000	237800000	238280000	210420000		Quantified
O88967	ATP-dependent zinc metalloprotease YME1L1	Yme1l1	FUNCTION: ATP-dependent metalloprotease that catalyzes the degradation of folded and unfolded proteins with a suitable degron sequence in the mitochondrial intermembrane region (By similarity). Plays an important role in regulating mitochondrial morphology and function by cleaving OPA1 at position S2, giving rise to a form of OPA1 that promotes maintenance of normal mitochondrial structure (PubMe…	sp|O88967|YMEL1_MOUSE	sp|O88967|YMEL1_MOUSE ATP-dependent zinc metalloprotease YME1L1 OS=Mus musculus OX=10090 GN=Yme1l1 PE=1 SV=1	1	7	7	7	13.3	80.027	22320000		38194000	29572000	27333000	36978000	16446000	29679000	25721000	21945000	28685000	29220000		Quantified
O89017	Legumain	Lgmn	FUNCTION: Has a strict specificity for hydrolysis of asparaginyl bonds. Can also cleave aspartyl bonds slowly, especially under acidic conditions. May be involved in the processing of proteins for MHC class II antigen presentation in the lysosomal/endosomal system. Required for normal lysosomal protein degradation in renal proximal tubules. Required for normal degradation of internalized EGFR. Pl…	sp|O89017|LGMN_MOUSE	sp|O89017|LGMN_MOUSE Legumain OS=Mus musculus OX=10090 GN=Lgmn PE=1 SV=1	1	1	1	1	3.9	49.372	92977000						234660000		223040000		71832000			Quantified
O89051	Integral membrane protein 2B	Itm2b	FUNCTION: Plays a regulatory role in the processing of the amyloid-beta A4 precursor protein (APP) and acts as an inhibitor of the amyloid-beta peptide aggregation and fibrils deposition. Plays a role in the induction of neurite outgrowth. Functions as a protease inhibitor by blocking access of secretases to APP cleavage sites (By similarity). {ECO:0000250}.; FUNCTION: Mature BRI2 (mBRI2) functio…	sp|O89051|ITM2B_MOUSE	sp|O89051|ITM2B_MOUSE Integral membrane protein 2B OS=Mus musculus OX=10090 GN=Itm2b PE=1 SV=1	1	1	1	1	3.8	30.26		17784000	17772000	24546000	34242000	27742000	26365000	25208000	26356000	14757000	35339000	22486000		Quantified
O89079	Coatomer subunit epsilon	Cope	FUNCTION: The coatomer is a cytosolic protein complex that binds to dilysine motifs and reversibly associates with Golgi non-clathrin-coated vesicles, which further mediate biosynthetic protein transport from the ER, via the Golgi up to the trans Golgi network. The coatomer complex is required for budding from Golgi membranes, and is essential for the retrograde Golgi-to-ER transport of dilysine-…	sp|O89079|COPE_MOUSE	sp|O89079|COPE_MOUSE Coatomer subunit epsilon OS=Mus musculus OX=10090 GN=Cope PE=1 SV=3	1	4	4	4	20.5	34.567	46919000	34969000	57691000	47495000		46417000		44137000		81843000	60881000	51225000		Quantified
O89112	Glutathione S-transferase LANCL1	Lancl1	FUNCTION: Functions as glutathione transferase (PubMed:25158856). Catalyzes conjugation of the glutathione (GSH) to artificial substrates 1-chloro-2,4-dinitrobenzene (CDNB) and p-nitrophenyl acetate (PubMed:25158856). Mitigates neuronal oxidative stress during normal postnatal development and in response to oxidative stresses probably through GSH antioxidant defense mechanism (PubMed:25158856). M…	sp|O89112|LANC1_MOUSE	sp|O89112|LANC1_MOUSE Glutathione S-transferase LANCL1 OS=Mus musculus OX=10090 GN=Lancl1 PE=1 SV=1	1	3	3	3	8.5	45.341	46530000	24024000	28655000	33551000	27471000	41172000	25762000	43243000	25888000	38764000	45627000	37695000		Quantified
P00158	Cytochrome b	Mt-Cyb	FUNCTION: Component of the ubiquinol-cytochrome c reductase complex (complex III or cytochrome b-c1 complex) that is part of the mitochondrial respiratory chain. The b-c1 complex mediates electron transfer from ubiquinol to cytochrome c. Contributes to the generation of a proton gradient across the mitochondrial membrane that is then used for ATP synthesis. {ECO:0000250|UniProtKB:P00157}.	sp|P00158|CYB_MOUSE	sp|P00158|CYB_MOUSE Cytochrome b OS=Mus musculus OX=10090 GN=Mt-Cyb PE=1 SV=1	1	2	2	2	5	43.209	188280000	227480000	174990000	210000000	218090000	173480000	379780000	194580000	201980000	197280000	208320000	192460000		Quantified
P00397	Cytochrome c oxidase subunit 1	Mtco1	FUNCTION: Component of the cytochrome c oxidase, the last enzyme in the mitochondrial electron transport chain which drives oxidative phosphorylation. The respiratory chain contains 3 multisubunit complexes succinate dehydrogenase (complex II, CII), ubiquinol-cytochrome c oxidoreductase (cytochrome b-c1 complex, complex III, CIII) and cytochrome c oxidase (complex IV, CIV), that cooperate to tran…	sp|P00397|COX1_MOUSE	sp|P00397|COX1_MOUSE Cytochrome c oxidase subunit 1 OS=Mus musculus OX=10090 GN=Mtco1 PE=1 SV=2	1	3	3	3	10.5	56.909	1158500000	713050000	929860000	956310000	996200000	1386000000	1178100000	918070000	957420000	1056600000	1411200000	1088100000		Quantified
P00405	Cytochrome c oxidase subunit 2	Mtco2	FUNCTION: Component of the cytochrome c oxidase, the last enzyme in the mitochondrial electron transport chain which drives oxidative phosphorylation. The respiratory chain contains 3 multisubunit complexes succinate dehydrogenase (complex II, CII), ubiquinol-cytochrome c oxidoreductase (cytochrome b-c1 complex, complex III, CIII) and cytochrome c oxidase (complex IV, CIV), that cooperate to tran…	sp|P00405|COX2_MOUSE	sp|P00405|COX2_MOUSE Cytochrome c oxidase subunit 2 OS=Mus musculus OX=10090 GN=Mtco2 PE=1 SV=1	1	9	9	9	48	25.976	29897000000	32755000000	35757000000	51216000000	35373000000	39530000000	48372000000	38707000000	37414000000	34080000000	25746000000	38335000000		Quantified
P00416	Cytochrome c oxidase subunit 3	mt-Co3	FUNCTION: Component of the cytochrome c oxidase, the last enzyme in the mitochondrial electron transport chain which drives oxidative phosphorylation. The respiratory chain contains 3 multisubunit complexes succinate dehydrogenase (complex II, CII), ubiquinol-cytochrome c oxidoreductase (cytochrome b-c1 complex, complex III, CIII) and cytochrome c oxidase (complex IV, CIV), that cooperate to tran…	sp|P00416|COX3_MOUSE	sp|P00416|COX3_MOUSE Cytochrome c oxidase subunit 3 OS=Mus musculus OX=10090 GN=mt-Co3 PE=1 SV=2	1	1	1	1	5.4	29.922	3689300000	2508800000	2998100000	6352200000	2871600000	2435700000	5145500000	2890400000	2958000000	1851000000	1578000000	2089000000		Quantified
P00848	ATP synthase subunit a	Mtatp6	FUNCTION: Mitochondrial membrane ATP synthase (F(1)F(0) ATP synthase or Complex V) produces ATP from ADP in the presence of a proton gradient across the membrane which is generated by electron transport complexes of the respiratory chain. F-type ATPases consist of two structural domains, F(1) - containing the extramembraneous catalytic core and F(0) - containing the membrane proton channel, linke…	sp|P00848|ATP6_MOUSE	sp|P00848|ATP6_MOUSE ATP synthase subunit a OS=Mus musculus OX=10090 GN=Mtatp6 PE=1 SV=1	1	2	2	2	8.4	25.095	1299000000	915700000	1211100000	1357900000	989620000	1223800000	805390000	1129000000	926910000	1579000000	994730000	1271400000		Quantified
P01027	Complement C3	C3	FUNCTION: C3 plays a central role in the activation of the complement system. Its processing by C3 convertase is the central reaction in both classical and alternative complement pathways. After activation C3b can bind covalently, via its reactive thioester, to cell surface carbohydrates or immune aggregates.; FUNCTION: Derived from proteolytic degradation of complement C3, C3a anaphylatoxin is a…	sp|P01027|CO3_MOUSE	sp|P01027|CO3_MOUSE Complement C3 OS=Mus musculus OX=10090 GN=C3 PE=1 SV=3	1	4	3	3	2.8	186.48						48550000				44190000				Identified
P01872	Immunoglobulin heavy constant mu	Ighm	FUNCTION: IgM antibodies play an important role in primary defense mechanisms. They have been shown to be involved in early recognition of external invaders like bacteria and viruses, cellular waste and modified self, as well as in recognition and elimination of precancerous and cancerous lesions (By similarity). {ECO:0000250}.	sp|P01872|IGHM_MOUSE	sp|P01872|IGHM_MOUSE Immunoglobulin heavy constant mu OS=Mus musculus OX=10090 GN=Ighm PE=1 SV=2	1	3	3	3	8.8	49.971											16780000			Identified
P01899	H-2 class I histocompatibility antigen, D-B alpha chain	H2-D1	FUNCTION: Involved in the presentation of foreign antigens to the immune system.	sp|P01899|HA11_MOUSE;sp|P01897|HA1L_MOUSE;sp|P01896|HA1Z_MOUSE;sp|P01898|HA10_MOUSE;sp|P01895|HA1Y_MOUSE;sp|P14428|HA1Q_MOUSE;sp|P01900|HA12_MOUSE;sp|P03991|HA1W_MOUSE	sp|P01899|HA11_MOUSE H-2 class I histocompatibility antigen, D-B alpha chain OS=Mus musculus OX=10090 GN=H2-D1 PE=1 SV=2;sp|P01897|HA1L_MOUSE H-2 class I histocompatibility antigen, L-D alpha chain OS=Mus musculus OX=10090 GN=H2-L PE=1 SV=2;sp|P01896|HA1Z_	8	4	4	3	15.2	40.836	36502000	71639000	77144000	55123000	32034000		18910000	40778000	40397000	52670000	38526000	72701000		Quantified
P14426	H-2 class I histocompatibility antigen, D-K alpha chain	H2-D1	FUNCTION: Involved in the presentation of foreign antigens to the immune system.	sp|P14426|HA13_MOUSE;sp|P01901|HA1B_MOUSE;sp|P14430|HA18_MOUSE;sp|P14429|HA17_MOUSE;sp|P04223|HA1K_MOUSE;sp|P14431|HA19_MOUSE	sp|P14426|HA13_MOUSE H-2 class I histocompatibility antigen, D-K alpha chain OS=Mus musculus OX=10090 GN=H2-D1 PE=1 SV=1;sp|P01901|HA1B_MOUSE H-2 class I histocompatibility antigen, K-B alpha chain OS=Mus musculus OX=10090 GN=H2-K1 PE=1 SV=1;sp|P14430|HA18	6	3	2	2	9.4	40.619														Identified
P01942	Hemoglobin subunit alpha	Hba	FUNCTION: Involved in oxygen transport from the lung to the various peripheral tissues.	sp|P01942|HBA_MOUSE;sp|P06467|HBAZ_MOUSE	sp|P01942|HBA_MOUSE Hemoglobin subunit alpha OS=Mus musculus OX=10090 GN=Hba PE=1 SV=2	2	7	7	5	62.7	15.085	7955300000	11237000000	7494700000	4634700000	8745900000	5409800000	5715800000	7498300000	19209000000	10425000000	11095000000	14244000000		Quantified
P02088	Hemoglobin subunit beta-1	Hbb-b1	FUNCTION: Involved in oxygen transport from the lung to the various peripheral tissues.	sp|P02088|HBB1_MOUSE;sp|P02089|HBB2_MOUSE;sp|P02104|HBE_MOUSE	sp|P02088|HBB1_MOUSE Hemoglobin subunit beta-1 OS=Mus musculus OX=10090 GN=Hbb-b1 PE=1 SV=2;sp|P02089|HBB2_MOUSE Hemoglobin subunit beta-2 OS=Mus musculus OX=10090 GN=Hbb-b2 PE=1 SV=2	3	8	8	6	59.9	15.84	8698500000	18404000000	9379100000	8244600000	10860000000	7063400000	10919000000	8238900000	22800000000	12021000000	12869000000	28901000000		Quantified
P84244	Histone H3.3	H3-3a	FUNCTION: Variant histone H3 which replaces conventional H3 in a wide range of nucleosomes in active genes. Constitutes the predominant form of histone H3 in non-dividing cells and is incorporated into chromatin independently of DNA synthesis. Deposited at sites of nucleosomal displacement throughout transcribed genes, suggesting that it represents an epigenetic imprint of transcriptionally activ…	sp|P84244|H33_MOUSE;sp|P02301|H3C_MOUSE	sp|P84244|H33_MOUSE Histone H3.3 OS=Mus musculus OX=10090 GN=H3-3a PE=1 SV=2;sp|P02301|H3C_MOUSE Histone H3.3C OS=Mus musculus OX=10090 GN=H3-5 PE=3 SV=3	2	5	5	1	40.4	15.328	8729300000	10195000000	4792400000	8884600000	6310800000	9348800000	9675900000	6670100000	6313700000	6740500000	7176100000	7324800000		Quantified
P02468	Laminin subunit gamma-1	Lamc1	FUNCTION: Binding to cells via a high affinity receptor, laminin is thought to mediate the attachment, migration and organization of cells into tissues during embryonic development by interacting with other extracellular matrix components.	sp|P02468|LAMC1_MOUSE	sp|P02468|LAMC1_MOUSE Laminin subunit gamma-1 OS=Mus musculus OX=10090 GN=Lamc1 PE=1 SV=2	1	9	9	9	7	177.3				22975000	27788000		187640000			19093000				Identified
P03888	NADH-ubiquinone oxidoreductase chain 1	Mtnd1	FUNCTION: Core subunit of the mitochondrial membrane respiratory chain NADH dehydrogenase (Complex I) that is believed to belong to the minimal assembly required for catalysis. Complex I functions in the transfer of electrons from NADH to the respiratory chain. The immediate electron acceptor for the enzyme is believed to be ubiquinone (By similarity). {ECO:0000250}.	sp|P03888|NU1M_MOUSE	sp|P03888|NU1M_MOUSE NADH-ubiquinone oxidoreductase chain 1 OS=Mus musculus OX=10090 GN=Mtnd1 PE=1 SV=3	1	4	4	4	14.2	36.059	1067600000	904200000	932810000	2291100000	1150900000	1239000000	1949200000	1173200000	853960000	750520000	1018300000	1047900000		Quantified
P03893	NADH-ubiquinone oxidoreductase chain 2	Mtnd2	FUNCTION: Core subunit of the mitochondrial membrane respiratory chain NADH dehydrogenase (Complex I) that is believed to belong to the minimal assembly required for catalysis. Complex I functions in the transfer of electrons from NADH to the respiratory chain. The immediate electron acceptor for the enzyme is believed to be ubiquinone (By similarity). {ECO:0000250}.	sp|P03893|NU2M_MOUSE	sp|P03893|NU2M_MOUSE NADH-ubiquinone oxidoreductase chain 2 OS=Mus musculus OX=10090 GN=Mtnd2 PE=1 SV=2	1	2	2	2	7.5	38.752	2002800000	1621600000	1525800000	4392900000	2273100000	2821100000	4275800000	2827400000	1895700000	1404900000	2226500000	2572000000		Quantified
P03899	NADH-ubiquinone oxidoreductase chain 3	Mtnd3	FUNCTION: Core subunit of the mitochondrial membrane respiratory chain NADH dehydrogenase (Complex I) that is believed to belong to the minimal assembly required for catalysis. Complex I functions in the transfer of electrons from NADH to the respiratory chain. The immediate electron acceptor for the enzyme is believed to be ubiquinone (By similarity). {ECO:0000250}.	sp|P03899|NU3M_MOUSE	sp|P03899|NU3M_MOUSE NADH-ubiquinone oxidoreductase chain 3 OS=Mus musculus OX=10090 GN=Mtnd3 PE=1 SV=3	1	1	1	1	13	13.219	437150000	512100000	494090000	1057700000	848990000	1207100000	617870000	865800000	456810000	423630000	198780000	505100000		Quantified
P03903	NADH-ubiquinone oxidoreductase chain 4L	Mtnd4l	FUNCTION: Core subunit of the mitochondrial membrane respiratory chain NADH dehydrogenase (Complex I) that is believed to belong to the minimal assembly required for catalysis. Complex I functions in the transfer of electrons from NADH to the respiratory chain. The immediate electron acceptor for the enzyme is believed to be ubiquinone (By similarity). {ECO:0000250}.	sp|P03903|NU4LM_MOUSE	sp|P03903|NU4LM_MOUSE NADH-ubiquinone oxidoreductase chain 4L OS=Mus musculus OX=10090 GN=Mtnd4l PE=1 SV=2	1	1	1	1	18.4	10.607	274270000	185740000	211770000	472720000	320030000	316820000	561830000	333180000	289640000		395680000	414910000		Quantified
P03911	NADH-ubiquinone oxidoreductase chain 4	Mtnd4	FUNCTION: Core subunit of the mitochondrial membrane respiratory chain NADH dehydrogenase (Complex I) that is believed to belong to the minimal assembly required for catalysis. Complex I functions in the transfer of electrons from NADH to the respiratory chain. The immediate electron acceptor for the enzyme is believed to be ubiquinone (By similarity). {ECO:0000250}.	sp|P03911|NU4M_MOUSE	sp|P03911|NU4M_MOUSE NADH-ubiquinone oxidoreductase chain 4 OS=Mus musculus OX=10090 GN=Mtnd4 PE=1 SV=1	1	4	4	4	10.9	51.881	238850000	211720000	171510000	233930000	161040000	177120000	173660000	183700000	209700000	149030000	155060000	214090000		Quantified
P03921	NADH-ubiquinone oxidoreductase chain 5	Mtnd5	FUNCTION: Core subunit of the mitochondrial membrane respiratory chain NADH dehydrogenase (Complex I) that is believed to belong to the minimal assembly required for catalysis. Complex I functions in the transfer of electrons from NADH to the respiratory chain. The immediate electron acceptor for the enzyme is believed to be ubiquinone (By similarity). {ECO:0000250}.	sp|P03921|NU5M_MOUSE	sp|P03921|NU5M_MOUSE NADH-ubiquinone oxidoreductase chain 5 OS=Mus musculus OX=10090 GN=Mtnd5 PE=1 SV=3	1	5	5	5	10.7	68.474	508550000	389680000	412150000	657950000	594440000	594080000	262690000	549230000	516660000	424390000	609970000	517560000		Quantified
P03930	ATP synthase protein 8	Mtatp8	FUNCTION: Mitochondrial membrane ATP synthase (F(1)F(0) ATP synthase or Complex V) produces ATP from ADP in the presence of a proton gradient across the membrane which is generated by electron transport complexes of the respiratory chain. F-type ATPases consist of two structural domains, F(1) - containing the extramembraneous catalytic core and F(0) - containing the membrane proton channel, linke…	sp|P03930|ATP8_MOUSE	sp|P03930|ATP8_MOUSE ATP synthase protein 8 OS=Mus musculus OX=10090 GN=Mtatp8 PE=1 SV=1	1	2	2	2	34.3	7.7662	2472800000	2331400000	1916100000	3012100000	2460900000	2171900000	2752000000	1973000000	2935700000	2194000000	2267200000	3564500000		Quantified
P04117	Fatty acid-binding protein, adipocyte	Fabp4	FUNCTION: Lipid transport protein in adipocytes. Binds both long chain fatty acids and retinoic acid. Delivers long-chain fatty acids and retinoic acid to their cognate receptors in the nucleus. {ECO:0000269|PubMed:12077340, ECO:0000269|PubMed:16574478, ECO:0000269|PubMed:17516629}.	sp|P04117|FABP4_MOUSE	sp|P04117|FABP4_MOUSE Fatty acid-binding protein, adipocyte OS=Mus musculus OX=10090 GN=Fabp4 PE=1 SV=3	1	7	7	7	50.8	14.65	47810000	67452000	85256000	77429000	75583000	59594000	74403000	18598000	134800000	80735000	96078000	91567000		Quantified
P04247	Myoglobin	Mb	FUNCTION: Serves as a reserve supply of oxygen and facilitates the movement of oxygen within muscles.	sp|P04247|MYG_MOUSE	sp|P04247|MYG_MOUSE Myoglobin OS=Mus musculus OX=10090 GN=Mb PE=1 SV=3	1	10	10	10	77.3	17.069	20390000000	19003000000	15940000000	19990000000	19718000000	19272000000	14882000000	20591000000	23646000000	25802000000	25702000000	22193000000		Quantified
P04919	Band 3 anion transport protein	Slc4a1	FUNCTION: Functions both as a transporter that mediates electroneutral anion exchange across the cell membrane and as a structural protein. Major integral membrane glycoprotein of the erythrocyte membrane; required for normal flexibility and stability of the erythrocyte membrane and for normal erythrocyte shape via the interactions of its cytoplasmic domain with cytoskeletal proteins, glycolytic …	sp|P04919|B3AT_MOUSE	sp|P04919|B3AT_MOUSE Band 3 anion transport protein OS=Mus musculus OX=10090 GN=Slc4a1 PE=1 SV=1	1	6	6	6	7.6	103.13	66831000	184900000	64677000	79854000	76315000	57001000	43914000	87803000	121620000	54213000	65064000	231440000		Quantified
P05064	Fructose-bisphosphate aldolase A	Aldoa	FUNCTION: Plays a key role in glycolysis and gluconeogenesis. In addition, may also function as scaffolding protein (By similarity). {ECO:0000250}.	sp|P05064|ALDOA_MOUSE	sp|P05064|ALDOA_MOUSE Fructose-bisphosphate aldolase A OS=Mus musculus OX=10090 GN=Aldoa PE=1 SV=2	1	6	6	6	26.4	39.355	79726000	318380000		90186000			87127000		272620000	210430000	88626000	60395000		Quantified
P05125	Natriuretic peptides A	Nppa	FUNCTION: [Atrial natriuretic peptide]: Hormone that plays a key role in mediating cardio-renal homeostasis, and is involved in vascular remodeling and regulating energy metabolism (PubMed:8760210, PubMed:22437503, PubMed:12890708). Acts by specifically binding and stimulating NPR1 to produce cGMP, which in turn activates effector proteins, such as PRKG1, that drive various biological responses (…	sp|P05125|ANF_MOUSE	sp|P05125|ANF_MOUSE Natriuretic peptides A OS=Mus musculus OX=10090 GN=Nppa PE=1 SV=2	1	2	2	2	14.5	16.572						24762000					24445000			Identified
P05132	cAMP-dependent protein kinase catalytic subunit alpha	Prkaca	FUNCTION: Phosphorylates a large number of substrates in the cytoplasm and the nucleus (By similarity). Phosphorylates CDC25B, ABL1, NFKB1, CLDN3, PSMC5/RPT6, PJA2, RYR2, RORA, SOX9 and VASP (PubMed:10805756, PubMed:19223768). Regulates the abundance of compartmentalized pools of its regulatory subunits through phosphorylation of PJA2 which binds and ubiquitinates these subunits, leading to their…	sp|P05132|KAPCA_MOUSE	sp|P05132|KAPCA_MOUSE cAMP-dependent protein kinase catalytic subunit alpha OS=Mus musculus OX=10090 GN=Prkaca PE=1 SV=3	1	15	15	7	51	40.57	1543000000	1514600000	1672000000	1715500000	1777700000	1459000000	1415600000	1787800000	1745400000	1687500000	2030500000	1715200000		Quantified
P05201	Aspartate aminotransferase, cytoplasmic	Got1	FUNCTION: Biosynthesis of L-glutamate from L-aspartate or L-cysteine. Important regulator of levels of glutamate, the major excitatory neurotransmitter of the vertebrate central nervous system. Acts as a scavenger of glutamate in brain neuroprotection. The aspartate aminotransferase activity is involved in hepatic glucose synthesis during development and in adipocyte glyceroneogenesis. Using L-cy…	sp|P05201|AATC_MOUSE	sp|P05201|AATC_MOUSE Aspartate aminotransferase, cytoplasmic OS=Mus musculus OX=10090 GN=Got1 PE=1 SV=3	1	4	4	4	12.8	46.247										41201000				Identified
P05202	Aspartate aminotransferase, mitochondrial	Got2	FUNCTION: Catalyzes the irreversible transamination of the L-tryptophan metabolite L-kynurenine to form kynurenic acid (KA). As a member of the malate-aspartate shuttle, it has a key role in the intracellular NAD(H) redox balance. Is important for metabolite exchange between mitochondria and cytosol, and for amino acid metabolism. Facilitates cellular uptake of long-chain free fatty acids. {ECO:0…	sp|P05202|AATM_MOUSE	sp|P05202|AATM_MOUSE Aspartate aminotransferase, mitochondrial OS=Mus musculus OX=10090 GN=Got2 PE=1 SV=1	1	13	13	13	31.2	47.411	513750000	374530000	444530000	404270000	365630000	617650000	659420000	576650000	498220000	645520000	487890000	513800000		Quantified
P05213	Tubulin alpha-1B chain	Tuba1b	FUNCTION: Tubulin is the major constituent of microtubules. It binds two moles of GTP, one at an exchangeable site on the beta chain and one at a non-exchangeable site on the alpha chain.	sp|P05213|TBA1B_MOUSE	sp|P05213|TBA1B_MOUSE Tubulin alpha-1B chain OS=Mus musculus OX=10090 GN=Tuba1b PE=1 SV=2	1	20	4	0	59.9	50.151	936520000	1173700000	940330000	961950000	823890000	1005100000	1123600000	919250000	1114500000	1174000000	991950000	1393500000		Quantified
P05977	Myosin light chain 1/3, skeletal muscle isoform	Myl1	FUNCTION: Non-regulatory myosin light chain required for proper formation and/or maintenance of myofibers, and thus appropriate muscle function. {ECO:0000250|UniProtKB:P05976}.	sp|P05977|MYL1_MOUSE	sp|P05977|MYL1_MOUSE Myosin light chain 1/3, skeletal muscle isoform OS=Mus musculus OX=10090 GN=Myl1 PE=1 SV=2	1	8	4	4	43.6	20.594	99647000	1451300000												Identified
P06151	L-lactate dehydrogenase A chain	Ldha		sp|P06151|LDHA_MOUSE;sp|P00342|LDHC_MOUSE	sp|P06151|LDHA_MOUSE L-lactate dehydrogenase A chain OS=Mus musculus OX=10090 GN=Ldha PE=1 SV=3	2	12	11	11	47.9	36.498	756120000	974410000	1154600000	722700000	682180000	925050000	888980000	713840000	919620000	1104800000	647300000	771990000		Quantified
P07310	Creatine kinase M-type	Ckm	FUNCTION: Reversibly catalyzes the transfer of phosphate between ATP and various phosphogens (e.g. creatine phosphate). Creatine kinase isoenzymes play a central role in energy transduction in tissues with large, fluctuating energy demands, such as skeletal muscle, heart, brain and spermatozoa.	sp|P07310|KCRM_MOUSE	sp|P07310|KCRM_MOUSE Creatine kinase M-type OS=Mus musculus OX=10090 GN=Ckm PE=1 SV=1	1	16	16	14	49.9	43.044	766410000	1105700000	734880000	772790000	1164700000	545340000	1516400000	846670000	1600700000	1070700000	1294500000	4640900000		Quantified
P07356	Annexin A2	Anxa2	FUNCTION: Calcium-regulated membrane-binding protein whose affinity for calcium is greatly enhanced by anionic phospholipids. It binds two calcium ions with high affinity. May be involved in heat-stress response (By similarity). Inhibits PCSK9-enhanced LDLR degradation, probably reduces PCSK9 protein levels via a translational mechanism but also competes with LDLR for binding with PCSK9 (PubMed:2…	sp|P07356|ANXA2_MOUSE	sp|P07356|ANXA2_MOUSE Annexin A2 OS=Mus musculus OX=10090 GN=Anxa2 PE=1 SV=2	1	23	23	23	69.3	38.676	2489400000	2033500000	2007000000	3336900000	3027700000	3001400000	2069300000	2199800000	2077800000	2374800000	2276800000	2339900000		Quantified
P07724	Albumin	Alb	FUNCTION: Binds water, Ca(2+), Na(+), K(+), fatty acids, hormones, bilirubin and drugs. Its main function is the regulation of the colloidal osmotic pressure of blood. Major zinc transporter in plasma, typically binds about 80% of all plasma zinc (By similarity). Major calcium and magnesium transporter in plasma, binds approximately 45% of circulating calcium and magnesium in plasma (By similarit…	sp|P07724|ALBU_MOUSE	sp|P07724|ALBU_MOUSE Albumin OS=Mus musculus OX=10090 GN=Alb PE=1 SV=3	1	29	26	26	53.5	68.692	1080000000	1226900000	1288000000	1216000000	1360900000	1053000000	1350300000	1077600000	1861000000	1639800000	1600800000	1633700000		Quantified
P07758	Alpha-1-antitrypsin 1-1	Serpina1a	FUNCTION: Inhibitor of serine proteases. Its primary target is elastase, but it also has a moderate affinity for plasmin and thrombin. {ECO:0000269|PubMed:11961105, ECO:0000269|PubMed:8619829}.	sp|P07758|A1AT1_MOUSE;sp|Q00896|A1AT3_MOUSE;sp|P22599|A1AT2_MOUSE	sp|P07758|A1AT1_MOUSE Alpha-1-antitrypsin 1-1 OS=Mus musculus OX=10090 GN=Serpina1a PE=1 SV=4;sp|Q00896|A1AT3_MOUSE Alpha-1-antitrypsin 1-3 OS=Mus musculus OX=10090 GN=Serpina1c PE=1 SV=2;sp|P22599|A1AT2_MOUSE Alpha-1-antitrypsin 1-2 OS=Mus musculus OX=100	3	10	10	4	34.6	46.002	125160000	223030000	201480000	106420000	235110000	155060000	115630000	235840000	407130000	320820000	320520000	293660000		Quantified
P07759	Serine protease inhibitor A3K	Serpina3k	FUNCTION: Contrapsin inhibits trypsin-like proteases. {ECO:0000269|PubMed:6214866, ECO:0000269|PubMed:6224776}.	sp|P07759|SPA3K_MOUSE;sp|P29621|SPA3C_MOUSE;sp|Q5I2A0|SPA3G_MOUSE;sp|Q80X76|SPA3F_MOUSE	sp|P07759|SPA3K_MOUSE Serine protease inhibitor A3K OS=Mus musculus OX=10090 GN=Serpina3k PE=1 SV=2	4	5	5	3	15.8	46.879	17240000		18672000		65050000	24253000	35286000		56784000	36808000	63521000	41021000		Quantified
P07901	Heat shock protein HSP 90-alpha	Hsp90aa1	FUNCTION: Molecular chaperone that promotes the maturation, structural maintenance and proper regulation of specific target proteins involved for instance in cell cycle control and signal transduction. Undergoes a functional cycle that is linked to its ATPase activity which is essential for its chaperone activity. This cycle probably induces conformational changes in the client proteins, thereby …	sp|P07901|HS90A_MOUSE	sp|P07901|HS90A_MOUSE Heat shock protein HSP 90-alpha OS=Mus musculus OX=10090 GN=Hsp90aa1 PE=1 SV=4	1	19	10	10	34	84.787	119230000	120200000	107610000	182680000	77872000	133280000	97861000	122500000	668230000	292540000	164880000	128610000		Quantified
P07934	Phosphorylase b kinase gamma catalytic chain, skeletal muscle/heart isoform	Phkg1	FUNCTION: Catalytic subunit of the phosphorylase b kinase (PHK), which mediates the neural and hormonal regulation of glycogen breakdown (glycogenolysis) by phosphorylating and thereby activating glycogen phosphorylase. In vitro, phosphorylates PYGM, TNNI3, MAPT/TAU, GAP43 and NRGN/RC3 (By similarity). {ECO:0000250}.	sp|P07934|PHKG1_MOUSE	sp|P07934|PHKG1_MOUSE Phosphorylase b kinase gamma catalytic chain, skeletal muscle/heart isoform OS=Mus musculus OX=10090 GN=Phkg1 PE=1 SV=3	1	2	2	2	7	44.959	83271000						38736000			4336900	8759600			Identified
P08030	Adenine phosphoribosyltransferase	Aprt	FUNCTION: Catalyzes a salvage reaction resulting in the formation of AMP, that is energically less costly than de novo synthesis.	sp|P08030|APT_MOUSE	sp|P08030|APT_MOUSE Adenine phosphoribosyltransferase OS=Mus musculus OX=10090 GN=Aprt PE=1 SV=2	1	4	4	4	32.8	19.724	23949000	35690000	45075000	21428000	32306000							46213000		Quantified
P08032	Spectrin alpha chain, erythrocytic 1	Spta1	FUNCTION: Spectrin is the major constituent of the cytoskeletal network underlying the erythrocyte plasma membrane. It associates with band 4.1 and actin to form the cytoskeletal superstructure of the erythrocyte plasma membrane.	sp|P08032|SPTA1_MOUSE	sp|P08032|SPTA1_MOUSE Spectrin alpha chain, erythrocytic 1 OS=Mus musculus OX=10090 GN=Spta1 PE=1 SV=3	1	21	20	20	10.9	279.86	22855000	161210000	47837000	47111000	25373000	76732000	350440000	51161000	38371000			290520000		Quantified
P08113	Endoplasmin	Hsp90b1	FUNCTION: Molecular chaperone that functions in the processing and transport of secreted proteins (PubMed:20865800). When associated with CNPY3, required for proper folding of Toll-like receptors (PubMed:20865800). Functions in endoplasmic reticulum associated degradation (ERAD) (By similarity). Has ATPase activity (PubMed:20865800). {ECO:0000250|UniProtKB:P14625, ECO:0000269|PubMed:20865800}.	sp|P08113|ENPL_MOUSE	sp|P08113|ENPL_MOUSE Endoplasmin OS=Mus musculus OX=10090 GN=Hsp90b1 PE=1 SV=2	1	19	18	18	27.9	92.475	384930000	294350000	377290000	455480000	439090000	450630000	454470000	438770000	540760000	516850000	457060000	444090000		Quantified
P08122	Collagen alpha-2(IV) chain	Col4a2	FUNCTION: Type IV collagen is the major structural component of glomerular basement membranes (GBM), forming a 'chicken-wire' meshwork together with laminins, proteoglycans and entactin/nidogen. {ECO:0000269|PubMed:3597383}.; FUNCTION: Canstatin, a cleavage product corresponding to the collagen alpha 2(IV) NC1 domain, possesses both anti-angiogenic and anti-tumor cell activity. It inhibits prolif…	sp|P08122|CO4A2_MOUSE	sp|P08122|CO4A2_MOUSE Collagen alpha-2(IV) chain OS=Mus musculus OX=10090 GN=Col4a2 PE=1 SV=4	1	1	1	1	0.8	167.32							20864000							Identified
P08207	Protein S100-A10	S100a10	FUNCTION: Because S100A10 induces the dimerization of ANXA2/p36, it may function as a regulator of protein phosphorylation in that the ANXA2 monomer is the preferred target (in vitro) of tyrosine-specific kinase.	sp|P08207|S10AA_MOUSE	sp|P08207|S10AA_MOUSE Protein S100-A10 OS=Mus musculus OX=10090 GN=S100a10 PE=1 SV=2	1	2	2	2	27.8	11.186	62987000	86072000	37586000	76435000	67785000	83052000	84748000		75533000		60444000	60333000		Quantified
P08249	Malate dehydrogenase, mitochondrial	Mdh2		sp|P08249|MDHM_MOUSE	sp|P08249|MDHM_MOUSE Malate dehydrogenase, mitochondrial OS=Mus musculus OX=10090 GN=Mdh2 PE=1 SV=3	1	14	14	14	52.1	35.611	482480000	392480000	478630000	526280000	483310000	584440000	622750000	582020000	863980000	1113200000	774550000	390770000		Quantified
P08556	GTPase NRas	Nras	FUNCTION: Ras proteins bind GDP/GTP and possess intrinsic GTPase activity. {ECO:0000250|UniProtKB:P01111}.	sp|P08556|RASN_MOUSE	sp|P08556|RASN_MOUSE GTPase NRas OS=Mus musculus OX=10090 GN=Nras PE=1 SV=1	1	5	5	1	30.2	21.199	157720000	146930000	163310000	155730000	149640000	174580000	113650000	182860000	191320000	150110000	116420000	142410000		Quantified
P08752	Guanine nucleotide-binding protein G(i) subunit alpha-2	Gnai2	FUNCTION: Guanine nucleotide-binding proteins (G proteins) are involved as modulators or transducers in various transmembrane signaling systems. The G(i) proteins are involved in hormonal regulation of adenylate cyclase: they inhibit the cyclase in response to beta-adrenergic stimuli. May play a role in cell division.	sp|P08752|GNAI2_MOUSE;sp|B2RSH2|GNAI1_MOUSE	sp|P08752|GNAI2_MOUSE Guanine nucleotide-binding protein G(i) subunit alpha-2 OS=Mus musculus OX=10090 GN=Gnai2 PE=1 SV=5	2	16	16	10	62.5	40.489	2433600000	2015700000	2048700000	2640000000	2480500000	2396700000	2371900000	2517600000	2306200000	1697400000	2130800000	2107900000		Quantified
P09411	Phosphoglycerate kinase 1	Pgk1	FUNCTION: Catalyzes one of the two ATP producing reactions in the glycolytic pathway via the reversible conversion of 1,3-diphosphoglycerate to 3-phosphoglycerate. In addition to its role as a glycolytic enzyme, it seems that PGK-1 acts as a polymerase alpha cofactor protein (primer recognition protein). May play a role in sperm motility. {ECO:0000250|UniProtKB:P00558}.	sp|P09411|PGK1_MOUSE;sp|P09041|PGK2_MOUSE	sp|P09411|PGK1_MOUSE Phosphoglycerate kinase 1 OS=Mus musculus OX=10090 GN=Pgk1 PE=1 SV=4	2	20	20	20	64.3	44.55	864770000	918640000	1166600000	880480000	873370000	900240000	1110300000	977190000	1169000000	1226100000	1621400000	881730000		Quantified
P09541	Myosin light chain 4	Myl4	FUNCTION: Regulatory light chain of myosin. Does not bind calcium. {ECO:0000305}.	sp|P09541|MYL4_MOUSE	sp|P09541|MYL4_MOUSE Myosin light chain 4 OS=Mus musculus OX=10090 GN=Myl4 PE=1 SV=3	1	11	10	9	61.1	21.159	1320100000	2233800000	3176200000	484010000	1225500000	1029400000	812390000	911420000	1934400000	1564400000	1298200000	1299000000		Quantified
P09542	Myosin light chain 3	Myl3	FUNCTION: Regulatory light chain of myosin. Does not bind calcium.	sp|P09542|MYL3_MOUSE	sp|P09542|MYL3_MOUSE Myosin light chain 3 OS=Mus musculus OX=10090 GN=Myl3 PE=1 SV=4	1	21	21	17	81.9	22.421	86251000000	101260000000	127410000000	50806000000	84706000000	80114000000	48157000000	79970000000	140430000000	162120000000	114890000000	107670000000		Quantified
P09671	Superoxide dismutase [Mn], mitochondrial	Sod2	FUNCTION: Destroys superoxide anion radicals which are normally produced within the cells and which are toxic to biological systems.	sp|P09671|SODM_MOUSE	sp|P09671|SODM_MOUSE Superoxide dismutase [Mn], mitochondrial OS=Mus musculus OX=10090 GN=Sod2 PE=1 SV=3	1	3	3	3	19.4	24.603	143370000	106710000	115120000	91890000	93606000	133070000	138340000	135140000	116400000	163650000	107770000	111880000		Quantified
P09690	Acetylcholine receptor subunit beta	Chrnb1	FUNCTION: After binding acetylcholine, the AChR responds by an extensive change in conformation that affects all subunits and leads to opening of an ion-conducting channel across the plasma membrane.	sp|P09690|ACHB_MOUSE	sp|P09690|ACHB_MOUSE Acetylcholine receptor subunit beta OS=Mus musculus OX=10090 GN=Chrnb1 PE=2 SV=1	1	1	1	1	2.4	56.93	55812000	70346000	72245000	34887000	70852000	63139000	40015000	39092000	70049000	56502000	60717000	53605000		Quantified
Q3THW5	Histone H2A.V	H2az2	FUNCTION: Variant histone H2A which replaces conventional H2A in a subset of nucleosomes. Nucleosomes wrap and compact DNA into chromatin, limiting DNA accessibility to the cellular machineries which require DNA as a template. Histones thereby play a central role in transcription regulation, DNA repair, DNA replication and chromosomal stability. DNA accessibility is regulated via a complex set of…	sp|Q3THW5|H2AV_MOUSE;sp|P0C0S6|H2AZ_MOUSE	sp|Q3THW5|H2AV_MOUSE Histone H2A.V OS=Mus musculus OX=10090 GN=H2az2 PE=1 SV=3;sp|P0C0S6|H2AZ_MOUSE Histone H2A.Z OS=Mus musculus OX=10090 GN=H2az1 PE=1 SV=2	2	4	2	2	43	13.509	304980000	383590000	245800000	140540000	216580000	160050000	388180000	285160000	578800000	427040000	283250000	157560000		Quantified
P0DN34	NADH dehydrogenase [ubiquinone] 1 beta subcomplex subunit 1	Ndufb1	FUNCTION: Accessory subunit of the mitochondrial membrane respiratory chain NADH dehydrogenase (Complex I) that is believed not to be involved in catalysis. Complex I functions in the transfer of electrons from NADH to the respiratory chain. The immediate electron acceptor for the enzyme is believed to be ubiquinone. {ECO:0000250|UniProtKB:O75438}.	sp|P0DN34|NDUB1_MOUSE	sp|P0DN34|NDUB1_MOUSE NADH dehydrogenase [ubiquinone] 1 beta subcomplex subunit 1 OS=Mus musculus OX=10090 GN=Ndufb1 PE=1 SV=1	1	1	1	1	19.3	6.954	248940000	274980000	333130000	268110000	308440000	335820000	296950000	251430000	287480000	258500000	296190000	261410000		Quantified
Q8CGE8	Interferon-activable protein 205-A	Ifi205a	FUNCTION: May act as a transcriptional regulator in the myeloid lineage. Inhibits cell growth via p53/TP53 and RB1-dependent and independent pathways (By similarity). {ECO:0000250}.	sp|Q8CGE8|IFI5A_MOUSE;sp|P0DOV1|IFI5B_MOUSE;sp|D0QMC3|MNDAL_MOUSE	sp|Q8CGE8|IFI5A_MOUSE Interferon-activable protein 205-A OS=Mus musculus OX=10090 GN=Ifi205a PE=2 SV=1;sp|P0DOV1|IFI5B_MOUSE Interferon-activable protein 205-B OS=Mus musculus OX=10090 GN=Mnda PE=1 SV=1	3	3	3	3	9.9	45.176	24215000		26917000	26698000			32991000	26311000		35633000	34906000	32226000		Quantified
P0DP28	Calmodulin-3	Calm3	FUNCTION: Calmodulin mediates the control of a large number of enzymes, ion channels, aquaporins and other proteins through calcium-binding. Among the enzymes to be stimulated by the calmodulin-calcium complex are a number of protein kinases and phosphatases. Together with CCP110 and centrin, is involved in a genetic pathway that regulates the centrosome cycle and progression through cytokinesis.…	sp|P0DP28|CALM3_MOUSE;sp|P0DP27|CALM2_MOUSE;sp|P0DP26|CALM1_MOUSE;sp|Q9D6P8|CALL3_MOUSE	sp|P0DP28|CALM3_MOUSE Calmodulin-3 OS=Mus musculus OX=10090 GN=Calm3 PE=1 SV=1;sp|P0DP27|CALM2_MOUSE Calmodulin-2 OS=Mus musculus OX=10090 GN=Calm2 PE=1 SV=1;sp|P0DP26|CALM1_MOUSE Calmodulin-1 OS=Mus musculus OX=10090 GN=Calm1 PE=1 SV=1	4	7	7	6	43.6	16.837	478030000	428930000	277670000	180830000	307220000	276600000	313000000	301230000	375910000	434540000	511680000	313670000		Quantified
P10107	Annexin A1	Anxa1	FUNCTION: Plays important roles in the innate immune response as effector of glucocorticoid-mediated responses and regulator of the inflammatory process. Has anti-inflammatory activity (PubMed:12475898). Plays a role in glucocorticoid-mediated down-regulation of the early phase of the inflammatory response (PubMed:12475898). Promotes resolution of inflammation and wound healing (PubMed:25664854).…	sp|P10107|ANXA1_MOUSE	sp|P10107|ANXA1_MOUSE Annexin A1 OS=Mus musculus OX=10090 GN=Anxa1 PE=1 SV=2	1	2	2	2	11.6	38.734		16691000		19563000		17171000								Identified
P10126	Elongation factor 1-alpha 1	Eef1a1	FUNCTION: This protein promotes the GTP-dependent binding of aminoacyl-tRNA to the A-site of ribosomes during protein biosynthesis. With PARP1 and TXK, forms a complex that acts as a T helper 1 (Th1) cell-specific transcription factor and binds the promoter of IFN-gamma to directly regulate its transcription, and is thus involved importantly in Th1 cytokine production. {ECO:0000250|UniProtKB:P681…	sp|P10126|EF1A1_MOUSE	sp|P10126|EF1A1_MOUSE Elongation factor 1-alpha 1 OS=Mus musculus OX=10090 GN=Eef1a1 PE=1 SV=3	1	18	9	9	56.5	50.113	3082800000	2659300000	3027000000	2624600000	2894100000	3607700000	1935800000	2807700000	3727200000	4172100000	4514800000	2958500000		Quantified
P10493	Nidogen-1	Nid1	FUNCTION: Sulfated glycoprotein widely distributed in basement membranes and tightly associated with laminin. Also binds to collagen IV and perlecan. It probably has a role in cell-extracellular matrix interactions.	sp|P10493|NID1_MOUSE	sp|P10493|NID1_MOUSE Nidogen-1 OS=Mus musculus OX=10090 GN=Nid1 PE=1 SV=2	1	8	8	7	8.4	136.54				18320000		36125000	97780000				25089000			Identified
P10518	Delta-aminolevulinic acid dehydratase	Alad	FUNCTION: Catalyzes an early step in the biosynthesis of tetrapyrroles. Binds two molecules of 5-aminolevulinate per subunit, each at a distinct site, and catalyzes their condensation to form porphobilinogen (By similarity). {ECO:0000250}.	sp|P10518|HEM2_MOUSE	sp|P10518|HEM2_MOUSE Delta-aminolevulinic acid dehydratase OS=Mus musculus OX=10090 GN=Alad PE=1 SV=1	1	1	1	1	3.6	36.023														Identified
P10605	Cathepsin B	Ctsb	FUNCTION: Thiol protease which is believed to participate in intracellular degradation and turnover of proteins (By similarity). Cleaves matrix extracellular phosphoglycoprotein MEPE (By similarity). Involved in the solubilization of cross-linked TG/thyroglobulin in the thyroid follicle lumen (PubMed:12782676). Has also been implicated in tumor invasion and metastasis (By similarity). {ECO:000025…	sp|P10605|CATB_MOUSE	sp|P10605|CATB_MOUSE Cathepsin B OS=Mus musculus OX=10090 GN=Ctsb PE=1 SV=2	1	3	3	3	12.7	37.279	41767000	28716000	78241000	33176000		59382000		39655000	29370000	33416000	48186000	27891000		Quantified
P10630	Eukaryotic initiation factor 4A-II	Eif4a2	FUNCTION: ATP-dependent RNA helicase which is a subunit of the eIF4F complex involved in cap recognition and is required for mRNA binding to ribosome. In the current model of translation initiation, eIF4A unwinds RNA secondary structures in the 5'-UTR of mRNAs which is necessary to allow efficient binding of the small ribosomal subunit, and subsequent scanning for the initiator codon.	sp|P10630|IF4A2_MOUSE	sp|P10630|IF4A2_MOUSE Eukaryotic initiation factor 4A-II OS=Mus musculus OX=10090 GN=Eif4a2 PE=1 SV=2	1	18	8	8	48.6	46.402	181370000	238440000	269130000	203650000	271250000	286670000	218640000	229750000	248300000	349100000	295480000	255640000		Quantified
P10639	Thioredoxin	Txn	FUNCTION: Participates in various redox reactions through the reversible oxidation of its active center dithiol to a disulfide and catalyzes dithiol-disulfide exchange reactions (By similarity). Plays a role in the reversible S-nitrosylation of cysteine residues in target proteins, and thereby contributes to the response to intracellular nitric oxide. Nitrosylates the active site Cys of CASP3 in …	sp|P10639|THIO_MOUSE	sp|P10639|THIO_MOUSE Thioredoxin OS=Mus musculus OX=10090 GN=Txn PE=1 SV=3	1	1	1	1	12.4	11.675			84924000	54311000	68205000	68575000		96462000		80738000	68625000	67976000		Quantified
P10649	Glutathione S-transferase Mu 1	Gstm1	FUNCTION: Conjugation of reduced glutathione to a wide number of exogenous and endogenous hydrophobic electrophiles. Involved in the formation of glutathione conjugates of both prostaglandin A2 (PGA2) and prostaglandin J2 (PGJ2). Participates in the formation of novel hepoxilin regioisomers. {ECO:0000250|UniProtKB:P09488}.	sp|P10649|GSTM1_MOUSE;sp|Q80W21|GSTM7_MOUSE;sp|P15626|GSTM2_MOUSE;sp|P19639|GSTM3_MOUSE;sp|O35660|GSTM6_MOUSE;sp|Q8R5I6|GSTM4_MOUSE	sp|P10649|GSTM1_MOUSE Glutathione S-transferase Mu 1 OS=Mus musculus OX=10090 GN=Gstm1 PE=1 SV=2;sp|Q80W21|GSTM7_MOUSE Glutathione S-transferase Mu 7 OS=Mus musculus OX=10090 GN=Gstm7 PE=1 SV=1;sp|P15626|GSTM2_MOUSE Glutathione S-transferase Mu 2 OS=Mus mu	6	4	4	3	20.2	25.97	37913000	22491000	40726000	38282000	36404000	50879000	48768000	45324000		78169000	60621000	39866000		Quantified
P10833	Ras-related protein R-Ras	Rras	FUNCTION: Regulates the organization of the actin cytoskeleton. With OSPBL3, modulates integrin beta-1 (ITGB1) activity. {ECO:0000250|UniProtKB:P10301}.	sp|P10833|RRAS_MOUSE	sp|P10833|RRAS_MOUSE Ras-related protein R-Ras OS=Mus musculus OX=10090 GN=Rras PE=1 SV=1	1	5	4	4	21.1	23.764	133540000	138620000	147860000	142130000	140030000	140870000	85975000	132960000	116180000	154200000	142080000	137910000		Quantified
Q6ZWY9	Histone H2B type 1-C/E/G	H2bc4	FUNCTION: Core component of nucleosome. Nucleosomes wrap and compact DNA into chromatin, limiting DNA accessibility to the cellular machineries which require DNA as a template. Histones thereby play a central role in transcription regulation, DNA repair, DNA replication and chromosomal stability. DNA accessibility is regulated via a complex set of post-translational modifications of histones, als…	sp|Q6ZWY9|H2B1C_MOUSE;sp|Q64525|H2B2B_MOUSE;sp|Q64478|H2B1H_MOUSE;sp|P10854|H2B1M_MOUSE;sp|Q8CGP2|H2B1P_MOUSE;sp|Q8CGP1|H2B1K_MOUSE;sp|Q64475|H2B1B_MOUSE;sp|P10853|H2B1F_MOUSE;sp|Q9D2U9|H2B3A_MOUSE;sp|Q8CGP0|H2B3B_MOUSE;sp|Q64524|H2B2E_MOUSE;sp|P70696|H2B1A_MOUSE	sp|Q6ZWY9|H2B1C_MOUSE Histone H2B type 1-C/E/G OS=Mus musculus OX=10090 GN=H2bc4 PE=1 SV=3;sp|Q64525|H2B2B_MOUSE Histone H2B type 2-B OS=Mus musculus OX=10090 GN=Hist2h2bb PE=1 SV=3;sp|Q64478|H2B1H_MOUSE Histone H2B type 1-H OS=Mus musculus OX=10090 GN=H2b	12	7	7	7	46.8	13.906	32547000000	32958000000	22403000000	28187000000	22083000000	23200000000	48669000000	33030000000	23718000000	24588000000	20425000000	27855000000		Quantified
P10922	Histone H1.0	H1-0	FUNCTION: Histones H1 are necessary for the condensation of nucleosome chains into higher-order structures. The histones H1.0 are found in cells that are in terminal stages of differentiation or that have low rates of cell division.	sp|P10922|H10_MOUSE	sp|P10922|H10_MOUSE Histone H1.0 OS=Mus musculus OX=10090 GN=H1-0 PE=2 SV=4	1	6	6	6	27.3	20.861	27677000000	34040000000	16173000000	22121000000	14419000000	18934000000	65346000000	33302000000	14132000000	16731000000	16225000000	19392000000		Quantified
P11087	Collagen alpha-1(I) chain	Col1a1	FUNCTION: Type I collagen is a member of group I collagen (fibrillar forming collagen).	sp|P11087|CO1A1_MOUSE	sp|P11087|CO1A1_MOUSE Collagen alpha-1(I) chain OS=Mus musculus OX=10090 GN=Col1a1 PE=1 SV=4	1	4	4	4	3.6	138.03	101370000	229740000	142890000	140810000	78333000	138010000	469790000	159180000	156020000	135830000	103040000	200180000		Quantified
P11103	Poly [ADP-ribose] polymerase 1	Parp1	FUNCTION: Poly-ADP-ribosyltransferase that mediates poly-ADP-ribosylation of proteins and plays a key role in DNA repair. Mainly mediates glutamate and aspartate ADP-ribosylation of target proteins: the ADP-D-ribosyl group of NAD(+) is transferred to the acceptor carboxyl group of glutamate and aspartate residues and further ADP-ribosyl groups are transferred to the 2'-position of the terminal ad…	sp|P11103|PARP1_MOUSE	sp|P11103|PARP1_MOUSE Poly [ADP-ribose] polymerase 1 OS=Mus musculus OX=10090 GN=Parp1 PE=1 SV=3	1	3	3	3	4.2	113.1	14268000								15241000					Identified
P11152	Lipoprotein lipase	Lpl	FUNCTION: Key enzyme in triglyceride metabolism. Catalyzes the hydrolysis of triglycerides from circulating chylomicrons and very low density lipoproteins (VLDL), and thereby plays an important role in lipid clearance from the blood stream, lipid utilization and storage (PubMed:8675619). Although it has both phospholipase and triglyceride lipase activities it is primarily a triglyceride lipase wi…	sp|P11152|LIPL_MOUSE	sp|P11152|LIPL_MOUSE Lipoprotein lipase OS=Mus musculus OX=10090 GN=Lpl PE=1 SV=3	1	15	15	15	36.1	53.109	954780000	1241000000	1219600000	931260000	1424900000	1291200000	1083600000	1431800000	1343400000	1381600000	1352400000	885030000		Quantified
P11276	Fibronectin	Fn1	FUNCTION: Fibronectins bind cell surfaces and various compounds including collagen, fibrin, heparin, DNA, and actin. Fibronectins are involved in cell adhesion, cell motility, opsonization, wound healing, and maintenance of cell shape healing, and maintenance of cell shape. Involved in osteoblast compaction through the fibronectin fibrillogenesis cell-mediated matrix assembly process, essential f…	sp|P11276|FINC_MOUSE	sp|P11276|FINC_MOUSE Fibronectin OS=Mus musculus OX=10090 GN=Fn1 PE=1 SV=4	1	6	6	6	3.4	272.53					12614000		95589000	13352000				18732000		Quantified
P11352	Glutathione peroxidase 1	Gpx1	FUNCTION: Protects the hemoglobin in erythrocytes from oxidative breakdown. In platelets, plays a crucial role of glutathione peroxidase in the arachidonic acid metabolism (PubMed:9195979). {ECO:0000269|PubMed:9195979}.	sp|P11352|GPX1_MOUSE	sp|P11352|GPX1_MOUSE Glutathione peroxidase 1 OS=Mus musculus OX=10090 GN=Gpx1 PE=1 SV=2	1	2	2	2	12.4	22.329	24779000	22852000	25063000	24341000	22182000	20299000		23739000	31450000	35003000	40791000	30328000		Quantified
P11404	Fatty acid-binding protein, heart	Fabp3	FUNCTION: FABP are thought to play a role in the intracellular transport of long-chain fatty acids and their acyl-CoA esters.	sp|P11404|FABPH_MOUSE	sp|P11404|FABPH_MOUSE Fatty acid-binding protein, heart OS=Mus musculus OX=10090 GN=Fabp3 PE=1 SV=5	1	3	3	3	21.1	14.819	37837000	21610000	23837000	31579000	35970000		28469000	20825000	77099000	106930000	87676000	21563000		Quantified
P11499	Heat shock protein HSP 90-beta	Hsp90ab1	FUNCTION: Molecular chaperone that promotes the maturation, structural maintenance and proper regulation of specific target proteins involved for instance in cell cycle control and signal transduction. Undergoes a functional cycle that is linked to its ATPase activity. This cycle probably induces conformational changes in the client proteins, thereby causing their activation. Interacts dynamicall…	sp|P11499|HS90B_MOUSE	sp|P11499|HS90B_MOUSE Heat shock protein HSP 90-beta OS=Mus musculus OX=10090 GN=Hsp90ab1 PE=1 SV=3	1	30	30	20	52.2	83.28	5131700000	4902700000	5621500000	6314700000	5028200000	5088100000	4045200000	4955400000	6107600000	6859200000	6666900000	5169300000		Quantified
P11531	Dystrophin	Dmd	FUNCTION: Anchors the extracellular matrix to the cytoskeleton via F-actin. Ligand for dystroglycan. Component of the dystrophin-associated glycoprotein complex which accumulates at the neuromuscular junction (NMJ) and at a variety of synapses in the peripheral and central nervous systems and has a structural function in stabilizing the sarcolemma. Also implicated in signaling events and synaptic…	sp|P11531|DMD_MOUSE	sp|P11531|DMD_MOUSE Dystrophin OS=Mus musculus OX=10090 GN=Dmd PE=1 SV=3	1	133	133	132	44.6	425.83	6599800000	7318100000	6782700000	6324900000	6306900000	4984700000	8886000000	5732600000	5002600000	5095700000	4600300000	7127200000		Quantified
P11798	Calcium/calmodulin-dependent protein kinase type II subunit alpha	Camk2a	FUNCTION: Calcium/calmodulin-dependent protein kinase that functions autonomously after Ca(2+)/calmodulin-binding and autophosphorylation, and is involved in synaptic plasticity, neurotransmitter release and long-term potentiation. Member of the NMDAR signaling complex in excitatory synapses, it regulates NMDAR-dependent potentiation of the AMPAR and therefore excitatory synaptic transmission (By…	sp|P11798|KCC2A_MOUSE	sp|P11798|KCC2A_MOUSE Calcium/calmodulin-dependent protein kinase type II subunit alpha OS=Mus musculus OX=10090 GN=Camk2a PE=1 SV=2	1	6	2	2	14.6	54.114	72998000	39017000	58740000	51435000	50713000	72849000		63368000	43668000	80810000	69553000	56970000		Quantified
P11983	T-complex protein 1 subunit alpha	Tcp1	FUNCTION: Component of the chaperonin-containing T-complex (TRiC), a molecular chaperone complex that assists the folding of proteins upon ATP hydrolysis. The TRiC complex mediates the folding of WRAP53/TCAB1, thereby regulating telomere maintenance. As part of the TRiC complex may play a role in the assembly of BBSome, a complex involved in ciliogenesis regulating transports vesicles to the cili…	sp|P11983|TCPA_MOUSE	sp|P11983|TCPA_MOUSE T-complex protein 1 subunit alpha OS=Mus musculus OX=10090 GN=Tcp1 PE=1 SV=3	1	24	24	24	52.3	60.448	1430900000	1277500000	1430700000	1387200000	1426500000	1481400000	1052400000	1454800000	1368800000	1689800000	1590200000	1372100000		Quantified
P12367	cAMP-dependent protein kinase type II-alpha regulatory subunit	Prkar2a	FUNCTION: Regulatory subunit of the cAMP-dependent protein kinases involved in cAMP signaling in cells. Type II regulatory chains mediate membrane association by binding to anchoring proteins, including the MAP2 kinase.	sp|P12367|KAP2_MOUSE;sp|P31324|KAP3_MOUSE	sp|P12367|KAP2_MOUSE cAMP-dependent protein kinase type II-alpha regulatory subunit OS=Mus musculus OX=10090 GN=Prkar2a PE=1 SV=2	2	9	9	9	28.4	45.389	139920000	68426000	106680000	183380000	129010000	157930000	75364000	153010000	124980000	98069000	140630000	184380000		Quantified
P12382	ATP-dependent 6-phosphofructokinase, liver type	Pfkl	FUNCTION: Catalyzes the phosphorylation of D-fructose 6-phosphate to fructose 1,6-bisphosphate by ATP, the first committing step of glycolysis (By similarity). Negatively regulates the phagocyte oxidative burst in response to bacterial infection by controlling cellular NADPH biosynthesis and NADPH oxidase-derived reactive oxygen species. Upon macrophage activation, drives the metabolic switch tow…	sp|P12382|PFKAL_MOUSE	sp|P12382|PFKAL_MOUSE ATP-dependent 6-phosphofructokinase, liver type OS=Mus musculus OX=10090 GN=Pfkl PE=1 SV=4	1	20	16	15	31.2	85.359	483960000	591480000	693970000	632550000	649820000	591470000	517240000	529480000	694860000	795020000	881560000	570700000		Quantified
P12787	Cytochrome c oxidase subunit 5A, mitochondrial	Cox5a	FUNCTION: Component of the cytochrome c oxidase, the last enzyme in the mitochondrial electron transport chain which drives oxidative phosphorylation. The respiratory chain contains 3 multisubunit complexes succinate dehydrogenase (complex II, CII), ubiquinol-cytochrome c oxidoreductase (cytochrome b-c1 complex, complex III, CIII) and cytochrome c oxidase (complex IV, CIV), that cooperate to tran…	sp|P12787|COX5A_MOUSE	sp|P12787|COX5A_MOUSE Cytochrome c oxidase subunit 5A, mitochondrial OS=Mus musculus OX=10090 GN=Cox5a PE=1 SV=2	1	4	4	4	41.8	16.101	2270400000	2815300000	3071600000	2768200000	2411400000	3117300000	1786800000	2544300000	2028000000	2568300000	2361900000	1846100000		Quantified
P12815	Programmed cell death protein 6	Pdcd6	FUNCTION: Calcium sensor that plays a key role in processes such as endoplasmic reticulum (ER)-Golgi vesicular transport, endosomal biogenesis or membrane repair (PubMed:10744743, PubMed:11525164, PubMed:27541325). Acts as an adapter that bridges unrelated proteins or stabilizes weak protein-protein complexes in response to calcium: calcium-binding triggers exposure of apolar surface, promoting i…	sp|P12815|PDCD6_MOUSE	sp|P12815|PDCD6_MOUSE Programmed cell death protein 6 OS=Mus musculus OX=10090 GN=Pdcd6 PE=1 SV=2	1	6	6	6	48.2	21.867	239230000	184970000	158220000	158800000	147810000	129050000	202160000	162090000	178770000	142770000	141040000	221730000		Quantified
P12970	60S ribosomal protein L7a	Rpl7a		sp|P12970|RL7A_MOUSE	sp|P12970|RL7A_MOUSE 60S ribosomal protein L7a OS=Mus musculus OX=10090 GN=Rpl7a PE=1 SV=2	1	12	12	12	48.5	29.976	1877100000	1790900000	1553200000	2066000000	1877700000	2013500000	1656900000	1754300000	1282500000	1897200000	1968100000	1759500000		Quantified
P13020	Gelsolin	Gsn	FUNCTION: Calcium-regulated, actin-modulating protein that binds to the plus (or barbed) ends of actin monomers or filaments, preventing monomer exchange (end-blocking or capping). It can promote the assembly of monomers into filaments (nucleation) as well as sever filaments already formed. Plays a role in ciliogenesis.	sp|P13020|GELS_MOUSE;CON__Q3SX14	sp|P13020|GELS_MOUSE Gelsolin OS=Mus musculus OX=10090 GN=Gsn PE=1 SV=3	2	27	27	27	49.2	85.941	7666900000	9422500000	6907000000	5712900000	8797100000	7169000000	8812500000	8634200000	7948500000	9073000000	8700600000	10106000000		Quantified
P13541	Myosin-3	Myh3	FUNCTION: Muscle contraction.	sp|P13541|MYH3_MOUSE	sp|P13541|MYH3_MOUSE Myosin-3 OS=Mus musculus OX=10090 GN=Myh3 PE=2 SV=2	1	59	8	7	21.2	223.79	37943000000	38014000000	39324000000	20034000000	33875000000	34684000000	42726000000	43063000000	44738000000	44904000000	42641000000	30188000000		Quantified
P13542	Myosin-8	Myh8	FUNCTION: Muscle contraction.	sp|P13542|MYH8_MOUSE	sp|P13542|MYH8_MOUSE Myosin-8 OS=Mus musculus OX=10090 GN=Myh8 PE=2 SV=2	1	62	3	3	19.4	222.7		348130000	517980000		430070000	315530000		249770000	435690000		298370000	354140000		Quantified
P13707	Glycerol-3-phosphate dehydrogenase [NAD(+)], cytoplasmic	Gpd1	FUNCTION: Has glycerol-3-phosphate dehydrogenase activity. {ECO:0000250|UniProtKB:P21695}.	sp|P13707|GPDA_MOUSE	sp|P13707|GPDA_MOUSE Glycerol-3-phosphate dehydrogenase [NAD(+)], cytoplasmic OS=Mus musculus OX=10090 GN=Gpd1 PE=1 SV=3	1	12	12	11	38.4	37.572	260510000	314180000	264170000	270330000	238160000	400170000	98228000	253480000	313180000	271830000	432360000	145450000		Quantified
P14094	Sodium/potassium-transporting ATPase subunit beta-1	Atp1b1	FUNCTION: This is the non-catalytic component of the active enzyme, which catalyzes the hydrolysis of ATP coupled with the exchange of Na(+) and K(+) ions across the plasma membrane. The beta subunit regulates, through assembly of alpha/beta heterodimers, the number of sodium pumps transported to the plasma membrane.; FUNCTION: Involved in cell adhesion and establishing epithelial cell polarity. …	sp|P14094|AT1B1_MOUSE	sp|P14094|AT1B1_MOUSE Sodium/potassium-transporting ATPase subunit beta-1 OS=Mus musculus OX=10090 GN=Atp1b1 PE=1 SV=1	1	9	9	9	36.5	35.194	1314100000	1410000000	1301000000	1599300000	1266900000	1080300000	886900000	1525700000	1288600000	1104000000	1368400000	1164300000		Quantified
P14115	60S ribosomal protein L27a	Rpl27a		sp|P14115|RL27A_MOUSE	sp|P14115|RL27A_MOUSE 60S ribosomal protein L27a OS=Mus musculus OX=10090 GN=Rpl27a PE=1 SV=5	1	4	4	4	23	16.605	647550000	504500000	451180000	537180000	564170000	584530000	919400000	583080000	452030000	666240000	504230000	752330000		Quantified
P14131	40S ribosomal protein S16	Rps16		sp|P14131|RS16_MOUSE	sp|P14131|RS16_MOUSE 40S ribosomal protein S16 OS=Mus musculus OX=10090 GN=Rps16 PE=1 SV=4	1	10	10	10	56.8	16.445	2241900000	2314300000	2188900000	2391800000	2065200000	2469400000	2157800000	2246500000	2292900000	2447400000	1583100000	2380000000		Quantified
P14142	Solute carrier family 2, facilitated glucose transporter member 4	Slc2a4	FUNCTION: Insulin-regulated facilitative glucose transporter, which plays a key role in removal of glucose from circulation (PubMed:26240143, PubMed:26629404). Response to insulin is regulated by its intracellular localization: in the absence of insulin, it is efficiently retained intracellularly within storage compartments in muscle and fat cells (PubMed:26240143, PubMed:26629404). Upon insulin …	sp|P14142|GLUT4_MOUSE	sp|P14142|GLUT4_MOUSE Solute carrier family 2, facilitated glucose transporter member 4 OS=Mus musculus OX=10090 GN=Slc2a4 PE=1 SV=3	1	5	5	5	9.4	54.755	410290000	369990000	393010000	482200000	327390000	323080000	226380000	366240000	297560000	347840000	253720000	410110000		Quantified
P14148	60S ribosomal protein L7	Rpl7	FUNCTION: Component of the large ribosomal subunit (By similarity). Binds to G-rich structures in 28S rRNA and in mRNAs. Plays a regulatory role in the translation apparatus; inhibits cell-free translation of mRNAs (By similarity). {ECO:0000250|UniProtKB:P18124}.	sp|P14148|RL7_MOUSE	sp|P14148|RL7_MOUSE 60S ribosomal protein L7 OS=Mus musculus OX=10090 GN=Rpl7 PE=1 SV=2	1	13	13	13	44.4	31.419	2282300000	2558200000	1878100000	3102400000	2195100000	2602000000	2157800000	2154700000	2095900000	2552500000	2153700000	2162200000		Quantified
P14152	Malate dehydrogenase, cytoplasmic	Mdh1		sp|P14152|MDHC_MOUSE	sp|P14152|MDHC_MOUSE Malate dehydrogenase, cytoplasmic OS=Mus musculus OX=10090 GN=Mdh1 PE=1 SV=3	1	7	7	7	28.1	36.511	181140000	180740000	174020000	200520000	212850000	172990000	189910000	212990000	290930000	319400000	301460000	158990000		Quantified
P14206	40S ribosomal protein SA	Rpsa	FUNCTION: Required for the assembly and/or stability of the 40S ribosomal subunit. Required for the processing of the 20S rRNA-precursor to mature 18S rRNA in a late step of the maturation of 40S ribosomal subunits. Also functions as a cell surface receptor for laminin. Plays a role in cell adhesion to the basement membrane and in the consequent activation of signaling transduction pathways. May …	sp|P14206|RSSA_MOUSE	sp|P14206|RSSA_MOUSE 40S ribosomal protein SA OS=Mus musculus OX=10090 GN=Rpsa PE=1 SV=4	1	12	12	12	55.6	32.838	1883500000	1568000000	1797600000	1716600000	1878000000	2077300000	1808300000	2044500000	1636500000	1662800000	1552100000	1781400000		Quantified
P14211	Calreticulin	Calr	FUNCTION: Calcium-binding chaperone that promotes folding, oligomeric assembly and quality control in the endoplasmic reticulum (ER) via the calreticulin/calnexin cycle. This lectin interacts transiently with almost all of the monoglucosylated glycoproteins that are synthesized in the ER. Interacts with the DNA-binding domain of NR3C1 and mediates its nuclear export. Involved in maternal gene exp…	sp|P14211|CALR_MOUSE	sp|P14211|CALR_MOUSE Calreticulin OS=Mus musculus OX=10090 GN=Calr PE=1 SV=1	1	1	1	1	7	47.994									63946000					Identified
P14602	Heat shock protein beta-1	Hspb1	FUNCTION: Small heat shock protein which functions as a molecular chaperone probably maintaining denatured proteins in a folding-competent state. Plays a role in stress resistance and actin organization (PubMed:17661394). Through its molecular chaperone activity may regulate numerous biological processes including the phosphorylation and the axonal transport of neurofilament proteins (By similari…	sp|P14602|HSPB1_MOUSE	sp|P14602|HSPB1_MOUSE Heat shock protein beta-1 OS=Mus musculus OX=10090 GN=Hspb1 PE=1 SV=3	1	13	13	13	80.9	23.014	4484200000	4774000000	4648700000	4434200000	4953600000	4220900000	4017900000	4687900000	4570000000	5751900000	5476600000	4505200000		Quantified
P14685	26S proteasome non-ATPase regulatory subunit 3	Psmd3	FUNCTION: Component of the 26S proteasome, a multiprotein complex involved in the ATP-dependent degradation of ubiquitinated proteins. This complex plays a key role in the maintenance of protein homeostasis by removing misfolded or damaged proteins, which could impair cellular functions, and by removing proteins whose functions are no longer required. Therefore, the proteasome participates in num…	sp|P14685|PSMD3_MOUSE	sp|P14685|PSMD3_MOUSE 26S proteasome non-ATPase regulatory subunit 3 OS=Mus musculus OX=10090 GN=Psmd3 PE=1 SV=3	1	17	17	17	38.1	60.718	596060000	603010000	568060000	550390000	532740000	576200000	391790000	537130000	583070000	664130000	591320000	547870000		Quantified
P14733	Lamin-B1	Lmnb1	FUNCTION: Lamins are components of the nuclear lamina, a fibrous layer on the nucleoplasmic side of the inner nuclear membrane, which is thought to provide a framework for the nuclear envelope and may also interact with chromatin.	sp|P14733|LMNB1_MOUSE	sp|P14733|LMNB1_MOUSE Lamin-B1 OS=Mus musculus OX=10090 GN=Lmnb1 PE=1 SV=3	1	26	25	24	48.1	66.785	947170000	936990000	938280000	883290000	897560000	973030000	836870000	1179500000	837820000	790430000	903110000	819250000		Quantified
P14824	Annexin A6	Anxa6	FUNCTION: May associate with CD21. May regulate the release of Ca(2+) from intracellular stores.	sp|P14824|ANXA6_MOUSE	sp|P14824|ANXA6_MOUSE Annexin A6 OS=Mus musculus OX=10090 GN=Anxa6 PE=1 SV=3	1	26	26	26	44.1	75.884	1842300000	1917200000	2081700000	1979900000	2300800000	2042300000	2501000000	1657000000	1878900000	1608000000	1612000000	1571100000		Quantified
P14869	60S acidic ribosomal protein P0	Rplp0	FUNCTION: Ribosomal protein P0 is the functional equivalent of E.coli protein L10.	sp|P14869|RLA0_MOUSE	sp|P14869|RLA0_MOUSE 60S acidic ribosomal protein P0 OS=Mus musculus OX=10090 GN=Rplp0 PE=1 SV=3	1	11	11	11	47.6	34.216	2565000000	2361000000	1837200000	2271600000	2906100000	1878900000	3364100000	2740500000	3040700000	1592300000	2327800000	2675200000		Quantified
P15116	Cadherin-2	Cdh2	FUNCTION: Calcium-dependent cell adhesion protein; preferentially mediates homotypic cell-cell adhesion by dimerization with a CDH2 chain from another cell (PubMed:2762814, PubMed:11433297, PubMed:17988630, PubMed:9655503, PubMed:25253890). Cadherins may thus contribute to the sorting of heterogeneous cell types. Acts as a regulator of neural stem cells quiescence by mediating anchorage of neural…	sp|P15116|CADH2_MOUSE;sp|P39038|CADH4_MOUSE	sp|P15116|CADH2_MOUSE Cadherin-2 OS=Mus musculus OX=10090 GN=Cdh2 PE=1 SV=2	2	6	6	6	8.6	99.795	51094000	28124000	68431000	42550000	43740000	54594000	38671000	77045000	29987000	28674000	69056000			Quantified
P15331	Peripherin	Prph	FUNCTION: Class-III neuronal intermediate filament protein (By similarity). May form an independent structural network without the involvement of other neurofilaments or may cooperate with the neuronal intermediate filament proteins NEFL, NEFH, NEFM and INA to form filamentous networks (PubMed:22723690, PubMed:15322088, PubMed:10426285). Assembly of the neuronal intermediate filaments may be regu…	sp|P15331|PERI_MOUSE	sp|P15331|PERI_MOUSE Peripherin OS=Mus musculus OX=10090 GN=Prph PE=1 SV=2	1	7	4	4	14.3	54.267	23464000			31956000	24648000	32912000	24834000							Quantified
P15508	Spectrin beta chain, erythrocytic	Sptb	FUNCTION: Spectrin is the major constituent of the cytoskeletal network underlying the erythrocyte plasma membrane. It associates with band 4.1 and actin to form the cytoskeletal superstructure of the erythrocyte plasma membrane.	sp|P15508|SPTB1_MOUSE	sp|P15508|SPTB1_MOUSE Spectrin beta chain, erythrocytic OS=Mus musculus OX=10090 GN=Sptb PE=1 SV=4	1	27	23	23	17.1	245.25	84601000	654390000	119220000	48344000	136750000	61222000	459770000	83698000	214150000	508530000	117890000	2167400000		Quantified
P15864	Histone H1.2	H1-2	FUNCTION: Histone H1 protein binds to linker DNA between nucleosomes forming the macromolecular structure known as the chromatin fiber. Histones H1 are necessary for the condensation of nucleosome chains into higher-order structured fibers. Acts also as a regulator of individual gene transcription through chromatin remodeling, nucleosome spacing and DNA methylation (By similarity). {ECO:0000250, …	sp|P15864|H12_MOUSE;sp|Q07133|H1T_MOUSE	sp|P15864|H12_MOUSE Histone H1.2 OS=Mus musculus OX=10090 GN=H1-2 PE=1 SV=2	2	13	13	5	37.7	21.266	22257000000	23827000000	11747000000	11129000000	14292000000	12261000000	38503000000	15231000000	12105000000	11375000000	9471300000	18006000000		Quantified
P16045	Galectin-1	Lgals1	FUNCTION: Lectin that binds beta-galactoside and a wide array of complex carbohydrates. Plays a role in regulating apoptosis, cell proliferation and cell differentiation. Inhibits CD45 protein phosphatase activity and therefore the dephosphorylation of Lyn kinase. Strong inducer of T-cell apoptosis. {ECO:0000250|UniProtKB:P09382, ECO:0000269|PubMed:1986871}.	sp|P16045|LEG1_MOUSE	sp|P16045|LEG1_MOUSE Galectin-1 OS=Mus musculus OX=10090 GN=Lgals1 PE=1 SV=3	1	6	6	6	70.4	14.866	383320000	446140000	343340000	290240000	439570000	387480000	357910000	373480000	416590000	324140000	351150000	411250000		Quantified
P16125	L-lactate dehydrogenase B chain	Ldhb		sp|P16125|LDHB_MOUSE	sp|P16125|LDHB_MOUSE L-lactate dehydrogenase B chain OS=Mus musculus OX=10090 GN=Ldhb PE=1 SV=2	1	13	13	12	48.8	36.572	1666900000	1778600000	2186000000	1458100000	1575000000	1755100000	1154500000	1332000000	1445500000	2248200000	1450800000	1167800000		Quantified
P16332	Methylmalonyl-CoA mutase, mitochondrial	Mmut	FUNCTION: Involved in the degradation of several amino acids, odd-chain fatty acids and cholesterol via propionyl-CoA to the tricarboxylic acid cycle. {ECO:0000250|UniProtKB:P22033}.	sp|P16332|MUTA_MOUSE	sp|P16332|MUTA_MOUSE Methylmalonyl-CoA mutase, mitochondrial OS=Mus musculus OX=10090 GN=Mmut PE=1 SV=2	1	5	5	5	10	82.843	10833000		44838000	46809000						49717000	17339000	12217000		Quantified
P16546	Spectrin alpha chain, non-erythrocytic 1	Sptan1	FUNCTION: Fodrin, which seems to be involved in secretion, interacts with calmodulin in a calcium-dependent manner and is thus candidate for the calcium-dependent movement of the cytoskeleton at the membrane.	sp|P16546|SPTN1_MOUSE	sp|P16546|SPTN1_MOUSE Spectrin alpha chain, non-erythrocytic 1 OS=Mus musculus OX=10090 GN=Sptan1 PE=1 SV=4	1	84	84	83	42.2	284.59	1487800000	2147100000	1700400000	1392600000	1756200000	2059000000	4539600000	1628900000	1469600000	1386700000	1241900000	2123200000		Quantified
P16675	Lysosomal protective protein	Ctsa	FUNCTION: Protective protein appears to be essential for both the activity of beta-galactosidase and neuraminidase, it associates with these enzymes and exerts a protective function necessary for their stability and activity. This protein is also a carboxypeptidase and can deamidate tachykinins.	sp|P16675|PPGB_MOUSE	sp|P16675|PPGB_MOUSE Lysosomal protective protein OS=Mus musculus OX=10090 GN=Ctsa PE=1 SV=1	1	1	1	1	2.1	53.844	12519000		16492000	16004000	14767000	16853000	13198000				17568000			Quantified
P16858	Glyceraldehyde-3-phosphate dehydrogenase	Gapdh	FUNCTION: Has both glyceraldehyde-3-phosphate dehydrogenase and nitrosylase activities, thereby playing a role in glycolysis and nuclear functions, respectively. Glyceraldehyde-3-phosphate dehydrogenase is a key enzyme in glycolysis that catalyzes the first step of the pathway by converting D-glyceraldehyde 3-phosphate (G3P) into 3-phospho-D-glyceroyl phosphate. Modulates the organization and ass…	sp|P16858|G3P_MOUSE	sp|P16858|G3P_MOUSE Glyceraldehyde-3-phosphate dehydrogenase OS=Mus musculus OX=10090 GN=Gapdh PE=1 SV=2	1	21	21	19	81.1	35.81	83470000000	89460000000	82631000000	84470000000	78585000000	76759000000	73248000000	71942000000	128120000000	129840000000	114710000000	102930000000		Quantified
P17156	Heat shock-related 70 kDa protein 2	Hspa2	FUNCTION: Molecular chaperone implicated in a wide variety of cellular processes, including protection of the proteome from stress, folding and transport of newly synthesized polypeptides, activation of proteolysis of misfolded proteins and the formation and dissociation of protein complexes. Plays a pivotal role in the protein quality control system, ensuring the correct folding of proteins, the…	sp|P17156|HSP72_MOUSE	sp|P17156|HSP72_MOUSE Heat shock-related 70 kDa protein 2 OS=Mus musculus OX=10090 GN=Hspa2 PE=1 SV=2	1	12	3	3	24.8	69.641	18107000	12432000		13778000	14544000	11251000	14279000	12654000			23295000	11858000		Quantified
P17182	Alpha-enolase	Eno1	FUNCTION: Glycolytic enzyme the catalyzes the conversion of 2-phosphoglycerate to phosphoenolpyruvate. In addition to glycolysis, involved in various processes such as growth control, hypoxia tolerance and allergic responses. May also function in the intravascular and pericellular fibrinolytic system due to its ability to serve as a receptor and activator of plasminogen on the cell surface of sev…	sp|P17182|ENOA_MOUSE	sp|P17182|ENOA_MOUSE Alpha-enolase OS=Mus musculus OX=10090 GN=Eno1 PE=1 SV=3	1	21	21	17	68.7	47.14	5611900000	6205100000	6744200000	5865100000	7104700000	7627800000	8995900000	6661300000	6315300000	5079200000	6101600000	7737000000		Quantified
P17225	Polypyrimidine tract-binding protein 1	Ptbp1	FUNCTION: Plays a role in pre-mRNA splicing and in the regulation of alternative splicing events. Activates exon skipping of its own pre-mRNA during muscle cell differentiation. Binds to the polypyrimidine tract of introns. May promote RNA looping when bound to two separate polypyrimidine tracts in the same pre-mRNA. May promote the binding of U2 snRNP to pre-mRNA. Cooperates with RAVER1 to modul…	sp|P17225|PTBP1_MOUSE;sp|Q8BHD7|PTBP3_MOUSE	sp|P17225|PTBP1_MOUSE Polypyrimidine tract-binding protein 1 OS=Mus musculus OX=10090 GN=Ptbp1 PE=1 SV=2	2	8	8	8	20.5	56.477	611520000	373370000	360380000	637380000	383830000	370520000	500830000	358590000	680300000	347370000	413360000	454060000		Quantified
P17426	AP-2 complex subunit alpha-1	Ap2a1	FUNCTION: Component of the adaptor protein complex 2 (AP-2). Adaptor protein complexes function in protein transport via transport vesicles in different membrane traffic pathways. Adaptor protein complexes are vesicle coat components and appear to be involved in cargo selection and vesicle formation. AP-2 is involved in clathrin-dependent endocytosis in which cargo proteins are incorporated into …	sp|P17426|AP2A1_MOUSE	sp|P17426|AP2A1_MOUSE AP-2 complex subunit alpha-1 OS=Mus musculus OX=10090 GN=Ap2a1 PE=1 SV=1	1	17	17	12	20.1	107.66	206440000	118190000	160080000	260910000	185000000	128740000	124490000	258210000	88175000	173210000	159150000	142480000		Quantified
P17427	AP-2 complex subunit alpha-2	Ap2a2	FUNCTION: Component of the adaptor protein complex 2 (AP-2). Adaptor protein complexes function in protein transport via transport vesicles in different membrane traffic pathways. Adaptor protein complexes are vesicle coat components and appear to be involved in cargo selection and vesicle formation. AP-2 is involved in clathrin-dependent endocytosis in which cargo proteins are incorporated into …	sp|P17427|AP2A2_MOUSE	sp|P17427|AP2A2_MOUSE AP-2 complex subunit alpha-2 OS=Mus musculus OX=10090 GN=Ap2a2 PE=1 SV=2	1	9	4	4	11.9	104.02	8823800	10491000		10959000	8331900				9984400		10091000	9006200		Quantified
P17563	Methanethiol oxidase	Selenbp1	FUNCTION: Catalyzes the oxidation of methanethiol, an organosulfur compound known to be produced in substantial amounts by gut bacteria (PubMed:29255262). Selenium-binding protein which may be involved in the sensing of reactive xenobiotics in the cytoplasm. May be involved in intra-Golgi protein transport (By similarity). {ECO:0000250|UniProtKB:Q8VIF7, ECO:0000269|PubMed:29255262}.	sp|P17563|SBP1_MOUSE;sp|Q63836|SBP2_MOUSE	sp|P17563|SBP1_MOUSE Methanethiol oxidase OS=Mus musculus OX=10090 GN=Selenbp1 PE=1 SV=2;sp|Q63836|SBP2_MOUSE Selenium-binding protein 2 OS=Mus musculus OX=10090 GN=Selenbp2 PE=1 SV=2	2	14	14	14	39.6	52.513	119140000	122710000	173490000	122680000	123660000	117380000	75001000	121950000	176800000	189840000	136610000	130460000		Quantified
P17665	Cytochrome c oxidase subunit 7C, mitochondrial	Cox7c	FUNCTION: Component of the cytochrome c oxidase, the last enzyme in the mitochondrial electron transport chain which drives oxidative phosphorylation. The respiratory chain contains 3 multisubunit complexes succinate dehydrogenase (complex II, CII), ubiquinol-cytochrome c oxidoreductase (cytochrome b-c1 complex, complex III, CIII) and cytochrome c oxidase (complex IV, CIV), that cooperate to tran…	sp|P17665|COX7C_MOUSE	sp|P17665|COX7C_MOUSE Cytochrome c oxidase subunit 7C, mitochondrial OS=Mus musculus OX=10090 GN=Cox7c PE=1 SV=1	1	2	2	2	28.6	7.3325	1426300000	1078900000	1111500000	1317100000	1658800000	1718700000	1764700000	2319200000	248660000	990590000	1145000000	1514200000		Quantified
P17710	Hexokinase-1	Hk1	FUNCTION: Catalyzes the phosphorylation of various hexoses, such as D-glucose, D-glucosamine, D-fructose, D-mannose and 2-deoxy-D-glucose, to hexose 6-phosphate (D-glucose 6-phosphate, D-glucosamine 6-phosphate, D-fructose 6-phosphate, D-mannose 6-phosphate and 2-deoxy-D-glucose 6-phosphate, respectively). Does not phosphorylate N-acetyl-D-glucosamine (By similarity). Mediates the initial step of…	sp|P17710|HXK1_MOUSE	sp|P17710|HXK1_MOUSE Hexokinase-1 OS=Mus musculus OX=10090 GN=Hk1 PE=1 SV=3	1	31	28	26	37.8	108.3	3821000000	3353600000	4623200000	3912800000	3568200000	4827900000	3017000000	3927100000	3200200000	3495400000	3885000000	2918500000		Quantified
P17742	Peptidyl-prolyl cis-trans isomerase A	Ppia	FUNCTION: PPIase that catalyzes the cis-trans isomerization of proline imidic peptide bonds in oligopeptides and may therefore assist protein folding. {ECO:0000250|UniProtKB:P62937}.	sp|P17742|PPIA_MOUSE	sp|P17742|PPIA_MOUSE Peptidyl-prolyl cis-trans isomerase A OS=Mus musculus OX=10090 GN=Ppia PE=1 SV=2	1	3	3	3	30.5	17.971	12919000	15318000		15190000			16876000	12989000	32483000	13006000	20525000	23958000		Quantified
P17751	Triosephosphate isomerase	Tpi1	FUNCTION: Triosephosphate isomerase is an extremely efficient metabolic enzyme that catalyzes the interconversion between dihydroxyacetone phosphate (DHAP) and D-glyceraldehyde-3-phosphate (G3P) in glycolysis and gluconeogenesis. {ECO:0000250|UniProtKB:P00939}.; FUNCTION: It is also responsible for the non-negligible production of methylglyoxal a reactive cytotoxic side-product that modifies and …	sp|P17751|TPIS_MOUSE	sp|P17751|TPIS_MOUSE Triosephosphate isomerase OS=Mus musculus OX=10090 GN=Tpi1 PE=1 SV=5	1	13	13	13	70.3	26.712	2420100000	2153100000	2760200000	2217600000	2382300000	2374100000	2285600000	1987000000	2750100000	2417100000	2205600000	2135200000		Quantified
Q61696	Heat shock 70 kDa protein 1A	Hspa1a	FUNCTION: Molecular chaperone implicated in a wide variety of cellular processes, including protection of the proteome from stress, folding and transport of newly synthesized polypeptides, activation of proteolysis of misfolded proteins and the formation and dissociation of protein complexes. Plays a pivotal role in the protein quality control system, ensuring the correct folding of proteins, the…	sp|Q61696|HS71A_MOUSE;sp|P17879|HS71B_MOUSE	sp|Q61696|HS71A_MOUSE Heat shock 70 kDa protein 1A OS=Mus musculus OX=10090 GN=Hspa1a PE=1 SV=2;sp|P17879|HS71B_MOUSE Heat shock 70 kDa protein 1B OS=Mus musculus OX=10090 GN=Hspa1b PE=1 SV=3	2	9	5	3	18.3	70.078	30575000	26474000	27996000	33264000	24518000	23763000	27027000	29999000	19938000		40808000			Quantified
P18242	Cathepsin D	Ctsd	FUNCTION: Acid protease active in intracellular protein breakdown. Plays a role in APP processing following cleavage and activation by ADAM30 which leads to APP degradation. {ECO:0000250|UniProtKB:P07339}.	sp|P18242|CATD_MOUSE	sp|P18242|CATD_MOUSE Cathepsin D OS=Mus musculus OX=10090 GN=Ctsd PE=1 SV=1	1	2	2	2	7.1	44.953					19671000	23271000					16476000			Identified
P18572	Basigin	Bsg	FUNCTION: Plays an important role in targeting the monocarboxylate transporters SLC16A1, SLC16A3, SLC16A8, SLC16A11 and SLC16A12 to the plasma membrane. Plays pivotal roles in spermatogenesis, embryo implantation, neural network formation and tumor progression. Stimulates adjacent fibroblasts to produce matrix metalloproteinases (MMPS). Seems to be a receptor for oligomannosidic glycans. In vitro…	sp|P18572|BASI_MOUSE	sp|P18572|BASI_MOUSE Basigin OS=Mus musculus OX=10090 GN=Bsg PE=1 SV=2	1	4	4	4	13.6	42.444	42649000	34185000	74348000	63748000	66107000	72376000	22976000	47531000	62125000	68867000	71203000	62583000		Quantified
P18654	Ribosomal protein S6 kinase alpha-3	Rps6ka3	FUNCTION: Serine/threonine-protein kinase that acts downstream of ERK (MAPK1/ERK2 and MAPK3/ERK1) signaling and mediates mitogenic and stress-induced activation of the transcription factors CREB1, ETV1/ER81 and NR4A1/NUR77, regulates translation through RPS6 and EIF4B phosphorylation, and mediates cellular proliferation, survival, and differentiation by modulating mTOR signaling and repressing pr…	sp|P18654|KS6A3_MOUSE;sp|P18653|KS6A1_MOUSE;sp|Q7TPS0|KS6A6_MOUSE;sp|Q9WUT3|KS6A2_MOUSE;sp|Q8C0P0|GWL_MOUSE;sp|Q3U214|MAST3_MOUSE;sp|Q811L6|MAST4_MOUSE	sp|P18654|KS6A3_MOUSE Ribosomal protein S6 kinase alpha-3 OS=Mus musculus OX=10090 GN=Rps6ka3 PE=1 SV=2;sp|P18653|KS6A1_MOUSE Ribosomal protein S6 kinase alpha-1 OS=Mus musculus OX=10090 GN=Rps6ka1 PE=1 SV=1	7	7	7	6	10.4	83.693	24251000			33475000	22558000	27564000		26384000	34147000	30075000	32257000	34623000		Quantified
P18760	Cofilin-1	Cfl1	FUNCTION: Binds to F-actin and exhibits pH-sensitive F-actin depolymerizing activity (PubMed:11809832). Regulates actin cytoskeleton dynamics. Important for normal progress through mitosis and normal cytokinesis. Plays a role in the regulation of cell morphology and cytoskeletal organization. Required for the up-regulation of atypical chemokine receptor ACKR2 from endosomal compartment to cell me…	sp|P18760|COF1_MOUSE	sp|P18760|COF1_MOUSE Cofilin-1 OS=Mus musculus OX=10090 GN=Cfl1 PE=1 SV=3	1	14	14	12	73.5	18.559	2186300000	2354700000	2124800000	2109500000	2417900000	2367000000	1603800000	2552800000	2788800000	3475700000	3428400000	2676700000		Quantified
P18872	Guanine nucleotide-binding protein G(o) subunit alpha	Gnao1	FUNCTION: Guanine nucleotide-binding proteins (G proteins) are involved as modulators or transducers in various transmembrane signaling systems. Stimulated by RGS14. The G(o) protein function is not clear. {ECO:0000269|PubMed:10926822}.	sp|P18872|GNAO_MOUSE	sp|P18872|GNAO_MOUSE Guanine nucleotide-binding protein G(o) subunit alpha OS=Mus musculus OX=10090 GN=Gnao1 PE=1 SV=3	1	6	4	4	20.1	40.084	111410000	63264000	41741000	76146000	106730000	61962000	50231000	61065000	47406000	66489000	95375000	58403000		Quantified
P19123	Troponin C, slow skeletal and cardiac muscles	Tnnc1	FUNCTION: Troponin is the central regulatory protein of striated muscle contraction. Tn consists of three components: Tn-I which is the inhibitor of actomyosin ATPase, Tn-T which contains the binding site for tropomyosin and Tn-C. The binding of calcium to Tn-C abolishes the inhibitory action of Tn on actin filaments.	sp|P19123|TNNC1_MOUSE	sp|P19123|TNNC1_MOUSE Troponin C, slow skeletal and cardiac muscles OS=Mus musculus OX=10090 GN=Tnnc1 PE=1 SV=1	1	8	8	8	54.7	18.42	4685100000	5870500000	6977300000	5646700000	4095700000	4322400000	4010500000	5664800000	7160900000	10183000000	9403100000	5172900000		Quantified
P19157	Glutathione S-transferase P 1	Gstp1	FUNCTION: Conjugation of reduced glutathione to a wide number of exogenous and endogenous hydrophobic electrophiles. Involved in the formation of glutathione conjugates of both prostaglandin A2 (PGA2) and prostaglandin J2 (PGJ2). Participates in the formation of novel hepoxilin regioisomers. Regulates negatively CDK5 activity via p25/p35 translocation to prevent neurodegeneration. {ECO:0000250|Un…	sp|P19157|GSTP1_MOUSE;sp|P46425|GSTP2_MOUSE	sp|P19157|GSTP1_MOUSE Glutathione S-transferase P 1 OS=Mus musculus OX=10090 GN=Gstp1 PE=1 SV=2;sp|P46425|GSTP2_MOUSE Glutathione S-transferase P 2 OS=Mus musculus OX=10090 GN=Gstp2 PE=1 SV=2	2	8	8	8	53.3	23.609	101230000	86584000	96304000	109970000	92688000		100900000	98049000	112220000	133190000	156780000	79633000		Quantified
P19253	60S ribosomal protein L13a	Rpl13a	FUNCTION: Associated with ribosomes but is not required for canonical ribosome function and has extra-ribosomal functions (By similarity). Component of the GAIT (gamma interferon-activated inhibitor of translation) complex which mediates interferon-gamma-induced transcript-selective translation inhibition in inflammation processes. Upon interferon-gamma activation and subsequent phosphorylation d…	sp|P19253|RL13A_MOUSE	sp|P19253|RL13A_MOUSE 60S ribosomal protein L13a OS=Mus musculus OX=10090 GN=Rpl13a PE=1 SV=4	1	6	6	6	30	23.464	540000000	552130000	662950000	702070000	670440000	858050000	482660000	571690000	511320000	685760000	654880000	581180000		Quantified
P19258	Protein Mpv17	Mpv17	FUNCTION: Non-selective channel that modulates the membrane potential under normal conditions and oxidative stress, and is involved in mitochondrial homeostasis (By similarity). Involved in mitochondrial deoxynucleoside triphosphates (dNTP) pool homeostasis and mitochondrial DNA (mtDNA) maintenance (PubMed:26760297). May be involved in the regulation of reactive oxygen species metabolism and the …	sp|P19258|MPV17_MOUSE	sp|P19258|MPV17_MOUSE Protein Mpv17 OS=Mus musculus OX=10090 GN=Mpv17 PE=1 SV=1	1	4	4	4	29	19.686	573430000	579110000	575130000	891780000	775330000	769190000	548310000	652170000	556110000	616920000	698240000	711830000		Quantified
P19324	Serpin H1	Serpinh1	FUNCTION: Binds specifically to collagen. Could be involved as a chaperone in the biosynthetic pathway of collagen.	sp|P19324|SERPH_MOUSE	sp|P19324|SERPH_MOUSE Serpin H1 OS=Mus musculus OX=10090 GN=Serpinh1 PE=1 SV=3	1	16	16	16	51.8	46.533	4058200000	3855700000	4096500000	3539500000	3551700000	3932400000	3265000000	4695900000	4137900000	3760700000	4551900000	3219100000		Quantified
P19536	Cytochrome c oxidase subunit 5B, mitochondrial	Cox5b	FUNCTION: Component of the cytochrome c oxidase, the last enzyme in the mitochondrial electron transport chain which drives oxidative phosphorylation. The respiratory chain contains 3 multisubunit complexes succinate dehydrogenase (complex II, CII), ubiquinol-cytochrome c oxidoreductase (cytochrome b-c1 complex, complex III, CIII) and cytochrome c oxidase (complex IV, CIV), that cooperate to tran…	sp|P19536|COX5B_MOUSE	sp|P19536|COX5B_MOUSE Cytochrome c oxidase subunit 5B, mitochondrial OS=Mus musculus OX=10090 GN=Cox5b PE=1 SV=1	1	5	5	5	37.5	13.813	1957500000	2213700000	2811300000	3168400000	2472100000	2681000000	2239400000	2666700000	2019600000	2401700000	2408800000	2424300000		Quantified
P19783	Cytochrome c oxidase subunit 4 isoform 1, mitochondrial	Cox4i1	FUNCTION: Component of the cytochrome c oxidase, the last enzyme in the mitochondrial electron transport chain which drives oxidative phosphorylation. The respiratory chain contains 3 multisubunit complexes succinate dehydrogenase (complex II, CII), ubiquinol-cytochrome c oxidoreductase (cytochrome b-c1 complex, complex III, CIII) and cytochrome c oxidase (complex IV, CIV), that cooperate to tran…	sp|P19783|COX41_MOUSE	sp|P19783|COX41_MOUSE Cytochrome c oxidase subunit 4 isoform 1, mitochondrial OS=Mus musculus OX=10090 GN=Cox4i1 PE=1 SV=2	1	7	7	7	47.3	19.53	3665400000	3957800000	4921800000	3657400000	4052800000	3926200000	2573100000	4242400000	3687000000	3798100000	3453200000	3345300000		Quantified
P20029	Endoplasmic reticulum chaperone BiP	Hspa5	FUNCTION: Endoplasmic reticulum chaperone that plays a key role in protein folding and quality control in the endoplasmic reticulum lumen (PubMed:12411443, PubMed:12475965). Involved in the correct folding of proteins and degradation of misfolded proteins via its interaction with DNAJC10/ERdj5, probably to facilitate the release of DNAJC10/ERdj5 from its substrate (PubMed:12411443). Acts as a key…	sp|P20029|BIP_MOUSE	sp|P20029|BIP_MOUSE Endoplasmic reticulum chaperone BiP OS=Mus musculus OX=10090 GN=Hspa5 PE=1 SV=3	1	22	20	20	43.1	72.421	1348900000	1339200000	1347900000	1435000000	1628800000	1460200000	1558300000	1753000000	1274300000	1473800000	1445400000	1127700000		Quantified
P20108	Thioredoxin-dependent peroxide reductase, mitochondrial	Prdx3	FUNCTION: Thiol-specific peroxidase that catalyzes the reduction of hydrogen peroxide and organic hydroperoxides to water and alcohols, respectively. Plays a role in cell protection against oxidative stress by detoxifying peroxides. {ECO:0000250|UniProtKB:P30048}.	sp|P20108|PRDX3_MOUSE	sp|P20108|PRDX3_MOUSE Thioredoxin-dependent peroxide reductase, mitochondrial OS=Mus musculus OX=10090 GN=Prdx3 PE=1 SV=1	1	6	6	6	39.7	28.127	188650000	182290000	166970000	165170000	162440000	115210000	138870000	92178000	188530000	159540000	144760000	241970000		Quantified
P20152	Vimentin	Vim	FUNCTION: Vimentins are class-III intermediate filaments found in various non-epithelial cells, especially mesenchymal cells. Vimentin is attached to the nucleus, endoplasmic reticulum, and mitochondria, either laterally or terminally.; FUNCTION: Involved with LARP6 in the stabilization of type I collagen mRNAs for CO1A1 and CO1A2. {ECO:0000250}.	sp|P20152|VIME_MOUSE;sp|P03995|GFAP_MOUSE;CON__Q61726;sp|Q9ERE2|KRT81_MOUSE;sp|P97861|KRT86_MOUSE;sp|Q6IMF0|KRT87_MOUSE;sp|P46660|AINX_MOUSE;sp|Q9Z2T6|KRT85_MOUSE;sp|P08551|NFL_MOUSE;sp|P08553|NFM_MOUSE	sp|P20152|VIME_MOUSE Vimentin OS=Mus musculus OX=10090 GN=Vim PE=1 SV=3	10	38	38	31	79	53.687	12976000000	13228000000	11581000000	13094000000	13946000000	21975000000	30239000000	17067000000	9971900000	9470700000	11930000000	14565000000		Quantified
P20444	Protein kinase C alpha type	Prkca	FUNCTION: Calcium-activated, phospholipid- and diacylglycerol (DAG)-dependent serine/threonine-protein kinase that is involved in positive and negative regulation of cell proliferation, apoptosis, differentiation, migration and adhesion, cardiac hypertrophy, angiogenesis, platelet function and inflammation, by directly phosphorylating targets such as RAF1, BCL2, CSPG4, TNNT2/CTNT, or activating s…	sp|P20444|KPCA_MOUSE;sp|P63318|KPCG_MOUSE	sp|P20444|KPCA_MOUSE Protein kinase C alpha type OS=Mus musculus OX=10090 GN=Prkca PE=1 SV=3;sp|P63318|KPCG_MOUSE Protein kinase C gamma type OS=Mus musculus OX=10090 GN=Prkcg PE=1 SV=1	2	2	2	2	3.9	76.851	33467000	58736000	64665000	48408000	45411000	29228000	27896000	46310000	64269000		24242000	51542000		Quantified
P20801	Troponin C, skeletal muscle	Tnnc2	FUNCTION: Troponin is the central regulatory protein of striated muscle contraction. Tn consists of three components: Tn-I which is the inhibitor of actomyosin ATPase, Tn-T which contains the binding site for tropomyosin and Tn-C. The binding of calcium to Tn-C abolishes the inhibitory action of Tn on actin filaments.	sp|P20801|TNNC2_MOUSE	sp|P20801|TNNC2_MOUSE Troponin C, skeletal muscle OS=Mus musculus OX=10090 GN=Tnnc2 PE=1 SV=2	1	3	2	2	16.9	18.11		71172000												Identified
P20918	Plasminogen	Plg	FUNCTION: Plasmin dissolves the fibrin of blood clots and acts as a proteolytic factor in a variety of other processes including embryonic development, tissue remodeling, tumor invasion, and inflammation. In ovulation, weakens the walls of the Graafian follicle. It activates the urokinase-type plasminogen activator, collagenases and several complement zymogens, such as C1 and C5. Cleavage of fibr…	sp|P20918|PLMN_MOUSE	sp|P20918|PLMN_MOUSE Plasminogen OS=Mus musculus OX=10090 GN=Plg PE=1 SV=3	1	9	9	9	14.9	90.807	61592000	88673000	88886000	67132000	62177000	71894000	59908000	65915000	131340000	97015000	90288000	93371000		Quantified
P21107	Tropomyosin alpha-3 chain	Tpm3	FUNCTION: Binds to actin filaments in muscle and non-muscle cells. Plays a central role, in association with the troponin complex, in the calcium dependent regulation of vertebrate striated muscle contraction. Smooth muscle contraction is regulated by interaction with caldesmon. In non-muscle cells is implicated in stabilizing cytoskeleton actin filaments. {ECO:0000250|UniProtKB:P09493}.	sp|P21107|TPM3_MOUSE	sp|P21107|TPM3_MOUSE Tropomyosin alpha-3 chain OS=Mus musculus OX=10090 GN=Tpm3 PE=1 SV=3	1	24	8	8	54.7	32.994	15014000000	16354000000	11188000000	7988800000	12455000000	12693000000	22843000000	13379000000	23159000000	12025000000	9396600000	19862000000		Quantified
P21278	Guanine nucleotide-binding protein subunit alpha-11	Gna11	FUNCTION: Guanine nucleotide-binding proteins (G proteins) are involved as modulators or transducers in various transmembrane signaling systems. Acts as an activator of phospholipase C. Transduces FFAR4 signaling in response to long-chain fatty acids (LCFAs). {ECO:0000250|UniProtKB:P29992}.	sp|P21278|GNA11_MOUSE;sp|P30677|GNA14_MOUSE;sp|O70443|GNAZ_MOUSE	sp|P21278|GNA11_MOUSE Guanine nucleotide-binding protein subunit alpha-11 OS=Mus musculus OX=10090 GN=Gna11 PE=1 SV=1	3	10	10	6	36.5	42.024	226070000	269190000	269100000	340290000	235980000	328390000	284930000	259140000	264950000	250840000	226100000	252140000		Quantified
P21279	Guanine nucleotide-binding protein G(q) subunit alpha	Gnaq	FUNCTION: Guanine nucleotide-binding proteins (G proteins) are involved as modulators or transducers in various transmembrane signaling systems. Regulates B-cell selection and survival and is required to prevent B-cell-dependent autoimmunity. Regulates chemotaxis of BM-derived neutrophils and dendritic cells (in vitro). Transduces FFAR4 signaling in response to long-chain fatty acids (LCFAs). {EC…	sp|P21279|GNAQ_MOUSE	sp|P21279|GNAQ_MOUSE Guanine nucleotide-binding protein G(q) subunit alpha OS=Mus musculus OX=10090 GN=Gnaq PE=1 SV=4	1	6	2	2	21.7	42.158	32376000		25468000	32379000	24321000		21619000		21561000	22388000		20541000		Quantified
P21300	Aldo-keto reductase family 1 member B7	Akr1b7	FUNCTION: Reduces a broad range of aliphatic and aromatic aldehydes to the corresponding alcohols. Reduces prostaglandins (PubMed:19010934). May play a role in the metabolism of xenobiotic aromatic aldehydes (By similarity). {ECO:0000250, ECO:0000269|PubMed:19010934}.	sp|P21300|ALD1_MOUSE	sp|P21300|ALD1_MOUSE Aldo-keto reductase family 1 member B7 OS=Mus musculus OX=10090 GN=Akr1b7 PE=1 SV=4	1	2	2	2	6.3	35.988	11906000			16744000	23894000	20322000		19792000		13264000	20467000			Quantified
P21550	Beta-enolase	Eno3	FUNCTION: Appears to have a function in striated muscle development and regeneration.	sp|P21550|ENOB_MOUSE	sp|P21550|ENOB_MOUSE Beta-enolase OS=Mus musculus OX=10090 GN=Eno3 PE=1 SV=3	1	15	12	11	44.7	47.024	2167400000	2284200000	2068600000	2156800000	2766000000	2489300000	2992600000	2086000000	2040500000	1806400000	1847600000	2724500000		Quantified
P21614	Vitamin D-binding protein	Gc	FUNCTION: Involved in vitamin D transport and storage, scavenging of extracellular G-actin, enhancement of the chemotactic activity of C5 alpha for neutrophils in inflammation and macrophage activation. {ECO:0000250|UniProtKB:P02774}.	sp|P21614|VTDB_MOUSE	sp|P21614|VTDB_MOUSE Vitamin D-binding protein OS=Mus musculus OX=10090 GN=Gc PE=1 SV=2	1	3	3	3	6.7	53.6			42211000	28510000	32870000		54036000	22797000	39646000	51086000	35680000	27237000		Quantified
P21619	Lamin-B2	Lmnb2	FUNCTION: Lamins are components of the nuclear lamina, a fibrous layer on the nucleoplasmic side of the inner nuclear membrane, which is thought to provide a framework for the nuclear envelope and may also interact with chromatin.	sp|P21619|LMNB2_MOUSE	sp|P21619|LMNB2_MOUSE Lamin-B2 OS=Mus musculus OX=10090 GN=Lmnb2 PE=1 SV=2	1	8	6	6	15.4	67.317	29146000	29088000	28138000	65983000	30240000	28595000	35688000	58156000	25025000			34805000		Quantified
P21765	Epididymal secretory glutathione peroxidase	Gpx5	FUNCTION: Protects cells and enzymes from oxidative damage, by catalyzing the reduction of hydrogen peroxide, lipid peroxides and organic hydroperoxide, by glutathione. May constitute a glutathione peroxidase-like protective system against peroxide damage in sperm membrane lipids.	sp|P21765|GPX5_MOUSE;sp|P46412|GPX3_MOUSE	sp|P21765|GPX5_MOUSE Epididymal secretory glutathione peroxidase OS=Mus musculus OX=10090 GN=Gpx5 PE=2 SV=3;sp|P46412|GPX3_MOUSE Glutathione peroxidase 3 OS=Mus musculus OX=10090 GN=Gpx3 PE=1 SV=2	2	1	1	1	5.4	25.392					42175000	74708000					29020000			Identified
P21956	Lactadherin	Mfge8	FUNCTION: Contributes to phagocytic removal of apoptotic cells in many tissues. Specific ligand for the alpha-v/beta-3 and alpha-v/beta-5 receptors. Also binds to phosphatidylserine-enriched cell surfaces in a receptor-independent manner. Zona pellucida-binding protein which may play a role in gamete interaction (By similarity). Plays an important role in the maintenance of intestinal epithelial …	sp|P21956|MFGM_MOUSE	sp|P21956|MFGM_MOUSE Lactadherin OS=Mus musculus OX=10090 GN=Mfge8 PE=1 SV=3	1	3	3	3	10.6	51.24	43841000		23381000	37075000	43522000	37644000	62601000	49686000	30310000			21522000		Quantified
P21958	Antigen peptide transporter 1	Tap1	FUNCTION: Involved in the transport of antigens from the cytoplasm to the endoplasmic reticulum for association with MHC class I molecules. Also acts as a molecular scaffold for the final stage of MHC class I folding, namely the binding of peptide. Nascent MHC class I molecules associate with TAP via tapasin (By similarity). {ECO:0000250}.	sp|P21958|TAP1_MOUSE	sp|P21958|TAP1_MOUSE Antigen peptide transporter 1 OS=Mus musculus OX=10090 GN=Tap1 PE=1 SV=3	1	4	4	4	6.5	78.863	36436000	35329000	25494000	87046000				21260000			17733000	25043000		Quantified
P21981	Protein-glutamine gamma-glutamyltransferase 2	Tgm2	FUNCTION: Catalyzes the cross-linking of proteins, such as WDR54, and the conjugation of polyamines to proteins. {ECO:0000250|UniProtKB:P21980}.	sp|P21981|TGM2_MOUSE	sp|P21981|TGM2_MOUSE Protein-glutamine gamma-glutamyltransferase 2 OS=Mus musculus OX=10090 GN=Tgm2 PE=1 SV=4	1	14	14	14	25.4	77.06	99979000	105100000	101660000	73878000	114750000	159970000	446870000	121110000	67516000	74007000	119170000	139490000		Quantified
P22315	Ferrochelatase, mitochondrial	Fech	FUNCTION: Catalyzes the ferrous insertion into protoporphyrin IX. {ECO:0000269|PubMed:27599036}.	sp|P22315|HEMH_MOUSE	sp|P22315|HEMH_MOUSE Ferrochelatase, mitochondrial OS=Mus musculus OX=10090 GN=Fech PE=1 SV=2	1	9	9	9	28.6	47.13	159380000	141820000	111560000	79467000	185900000	157010000	108250000	170010000	121560000	166640000	113620000	202750000		Quantified
P23116	Eukaryotic translation initiation factor 3 subunit A	Eif3a	FUNCTION: RNA-binding component of the eukaryotic translation initiation factor 3 (eIF-3) complex, which is required for several steps in the initiation of protein synthesis. The eIF-3 complex associates with the 40S ribosome and facilitates the recruitment of eIF-1, eIF-1A, eIF-2:GTP:methionyl-tRNAi and eIF-5 to form the 43S pre-initiation complex (43S PIC). The eIF-3 complex stimulates mRNA rec…	sp|P23116|EIF3A_MOUSE	sp|P23116|EIF3A_MOUSE Eukaryotic translation initiation factor 3 subunit A OS=Mus musculus OX=10090 GN=Eif3a PE=1 SV=5	1	11	11	11	8.9	161.93	980860000	235500000	1366100000	1335300000	785080000	1023900000	661060000	740520000	596160000	622920000	1066500000	862020000		Quantified
P23198	Chromobox protein homolog 3	Cbx3	FUNCTION: Component of heterochromatin. Recognizes and binds histone H3 tails methylated at 'Lys-9', leading to epigenetic repression. Probably involved in the repression of many genes located in euchromatin, such as E2F1, MYC and CDC25A. Involved in the formation of functional kinetochore through interaction with MIS12 complex proteins. Contributes to the conversion of local chromatin to a heter…	sp|P23198|CBX3_MOUSE	sp|P23198|CBX3_MOUSE Chromobox protein homolog 3 OS=Mus musculus OX=10090 GN=Cbx3 PE=1 SV=2	1	2	2	1	13.1	20.855							6901100							Identified
P23242	Gap junction alpha-1 protein	Gja1	FUNCTION: Gap junction protein that acts as a regulator of bladder capacity. A gap junction consists of a cluster of closely packed pairs of transmembrane channels, the connexons, through which materials of low MW diffuse from one cell to a neighboring cell. Negative regulator of bladder functional capacity: acts by enhancing intercellular electrical and chemical transmission, thus sensitizing bl…	sp|P23242|CXA1_MOUSE	sp|P23242|CXA1_MOUSE Gap junction alpha-1 protein OS=Mus musculus OX=10090 GN=Gja1 PE=1 SV=2	1	10	10	10	39.5	43.004	1047000000	1037700000	565150000	843070000	1198100000	575190000	560110000	1175900000	841730000	539020000	995570000	822610000		Quantified
P23927	Alpha-crystallin B chain	Cryab	FUNCTION: May contribute to the transparency and refractive index of the lens. Has chaperone-like activity, preventing aggregation of various proteins under a wide range of stress conditions.	sp|P23927|CRYAB_MOUSE	sp|P23927|CRYAB_MOUSE Alpha-crystallin B chain OS=Mus musculus OX=10090 GN=Cryab PE=1 SV=2	1	12	12	12	60.6	20.069	20169000000	23345000000	22934000000	24301000000	21572000000	17716000000	21799000000	21624000000	25867000000	26297000000	22535000000	19654000000		Quantified
P24369	Peptidyl-prolyl cis-trans isomerase B	Ppib	FUNCTION: PPIase that catalyzes the cis-trans isomerization of proline imidic peptide bonds in oligopeptides and may therefore assist protein folding. {ECO:0000250|UniProtKB:P23284}.	sp|P24369|PPIB_MOUSE	sp|P24369|PPIB_MOUSE Peptidyl-prolyl cis-trans isomerase B OS=Mus musculus OX=10090 GN=Ppib PE=1 SV=2	1	6	6	6	32.9	23.713	103430000	96020000	115520000	136440000	83539000	142600000	210270000	106420000	100360000	107450000	89382000	165980000		Quantified
P24457	Cytochrome P450 2D11	Cyp2d11	FUNCTION: Cytochromes P450 are a group of heme-thiolate monooxygenases. In liver microsomes, this enzyme is involved in an NADPH-dependent electron transport pathway. It oxidizes a variety of structurally unrelated compounds, including steroids, fatty acids, and xenobiotics.	sp|P24457|CP2DB_MOUSE	sp|P24457|CP2DB_MOUSE Cytochrome P450 2D11 OS=Mus musculus OX=10090 GN=Cyp2d11 PE=2 SV=2	1	1	1	1	2.6	56.987		11560000	8529200	8701100										Quantified
P25444	40S ribosomal protein S2	Rps2		sp|P25444|RS2_MOUSE	sp|P25444|RS2_MOUSE 40S ribosomal protein S2 OS=Mus musculus OX=10090 GN=Rps2 PE=1 SV=3	1	14	14	14	50.9	31.231	3552700000	3016600000	2927400000	3782100000	3165500000	3607400000	3044700000	2958400000	3218500000	3181600000	3220500000	3985900000		Quantified
P25911	Tyrosine-protein kinase Lyn	Lyn	FUNCTION: Non-receptor tyrosine-protein kinase that transmits signals from cell surface receptors and plays an important role in the regulation of innate and adaptive immune responses, hematopoiesis, responses to growth factors and cytokines, integrin signaling, but also responses to DNA damage and genotoxic agents. Functions primarily as negative regulator, but can also function as activator, de…	sp|P25911|LYN_MOUSE;sp|P16277|BLK_MOUSE	sp|P25911|LYN_MOUSE Tyrosine-protein kinase Lyn OS=Mus musculus OX=10090 GN=Lyn PE=1 SV=4	2	8	8	8	23.2	58.812	42092000	51627000	55680000	41675000	44285000	43368000		38908000	36414000	40957000	102590000	69330000		Quantified
P26039	Talin-1	Tln1	FUNCTION: Probably involved in connections of major cytoskeletal structures to the plasma membrane. High molecular weight cytoskeletal protein concentrated at regions of cell-substratum contact and, in lymphocytes, at cell-cell contacts.	sp|P26039|TLN1_MOUSE	sp|P26039|TLN1_MOUSE Talin-1 OS=Mus musculus OX=10090 GN=Tln1 PE=1 SV=2	1	41	41	34	21.8	269.82	458000000	559720000	427110000	763610000	358070000	449770000	497810000	407150000	591680000	435210000	358050000	576690000		Quantified
P26041	Moesin	Msn	FUNCTION: Ezrin-radixin-moesin (ERM) family protein that connects the actin cytoskeleton to the plasma membrane and thereby regulates the structure and function of specific domains of the cell cortex. Tethers actin filaments by oscillating between a resting and an activated state providing transient interactions between moesin and the actin cytoskeleton (By similarity). Once phosphorylated on its…	sp|P26041|MOES_MOUSE;sp|P26043|RADI_MOUSE;sp|P26040|EZRI_MOUSE	sp|P26041|MOES_MOUSE Moesin OS=Mus musculus OX=10090 GN=Msn PE=1 SV=3;sp|P26043|RADI_MOUSE Radixin OS=Mus musculus OX=10090 GN=Rdx PE=1 SV=3	3	6	6	6	12	67.766	21216000	147660000	1350100000	209910000		130190000	187180000	243400000		157210000		233570000		Quantified
P26231	Catenin alpha-1	Ctnna1	FUNCTION: Associates with the cytoplasmic domain of a variety of cadherins. The association of catenins to cadherins produces a complex which is linked to the actin filament network, and which seems to be of primary importance for cadherins cell-adhesion properties. Can associate with both E- and N-cadherins. Originally believed to be a stable component of E-cadherin/catenin adhesion complexes an…	sp|P26231|CTNA1_MOUSE;sp|Q61301|CTNA2_MOUSE	sp|P26231|CTNA1_MOUSE Catenin alpha-1 OS=Mus musculus OX=10090 GN=Ctnna1 PE=1 SV=1	2	12	11	11	19.4	100.11	47461000	39227000	45098000	57954000	37212000	31338000	39000000	39230000	64633000	135190000	34902000	32894000		Quantified
P26443	Glutamate dehydrogenase 1, mitochondrial	Glud1	FUNCTION: Mitochondrial glutamate dehydrogenase that converts L-glutamate into alpha-ketoglutarate. Plays a key role in glutamine anaplerosis by producing alpha-ketoglutarate, an important intermediate in the tricarboxylic acid cycle. May be involved in learning and memory reactions by increasing the turnover of the excitatory neurotransmitter glutamate. {ECO:0000269|PubMed:23663782}.	sp|P26443|DHE3_MOUSE	sp|P26443|DHE3_MOUSE Glutamate dehydrogenase 1, mitochondrial OS=Mus musculus OX=10090 GN=Glud1 PE=1 SV=1	1	15	15	15	32.3	61.336	220220000	209570000	294590000	268950000	193360000	282390000	216950000	243670000	193340000	189050000	202250000	232940000		Quantified
P26516	26S proteasome non-ATPase regulatory subunit 7	Psmd7	FUNCTION: Component of the 26S proteasome, a multiprotein complex involved in the ATP-dependent degradation of ubiquitinated proteins. This complex plays a key role in the maintenance of protein homeostasis by removing misfolded or damaged proteins, which could impair cellular functions, and by removing proteins whose functions are no longer required. Therefore, the proteasome participates in num…	sp|P26516|PSMD7_MOUSE	sp|P26516|PSMD7_MOUSE 26S proteasome non-ATPase regulatory subunit 7 OS=Mus musculus OX=10090 GN=Psmd7 PE=1 SV=2	1	5	5	5	17.8	36.539	76827000	71239000	68863000	90022000		48498000	56739000	74435000	67728000	50161000	59923000	86008000		Quantified
P26638	Serine--tRNA ligase, cytoplasmic	Sars1	FUNCTION: Catalyzes the attachment of serine to tRNA(Ser) in a two-step reaction: serine is first activated by ATP to form Ser-AMP and then transferred to the acceptor end of tRNA(Ser). Is probably also able to aminoacylate tRNA(Sec) with serine, to form the misacylated tRNA L-seryl-tRNA(Sec), which will be further converted into selenocysteinyl-tRNA(Sec). In the nucleus, binds to the VEGFA core …	sp|P26638|SYSC_MOUSE	sp|P26638|SYSC_MOUSE Serine--tRNA ligase, cytoplasmic OS=Mus musculus OX=10090 GN=Sars1 PE=1 SV=3	1	6	6	6	13.9	58.388	98495000	102970000	93402000	96864000	82574000	87651000	54654000	70835000	136140000	118250000	106840000	111690000		Quantified
P27546	Microtubule-associated protein 4	Map4	FUNCTION: Non-neuronal microtubule-associated protein. Promotes microtubule assembly.	sp|P27546|MAP4_MOUSE	sp|P27546|MAP4_MOUSE Microtubule-associated protein 4 OS=Mus musculus OX=10090 GN=Map4 PE=1 SV=3	1	5	5	5	6.6	117.43	32576000		24263000	25934000		36020000				50364000	38217000			Quantified
P27601	Guanine nucleotide-binding protein subunit alpha-13	Gna13	FUNCTION: Guanine nucleotide-binding proteins (G proteins) are involved as modulators or transducers in various transmembrane signaling systems (PubMed:21212405, PubMed:19151758, PubMed:16388592). Activates effector molecule RhoA by binding and activating RhoGEFs (ARHGEF1/p115RhoGEF, ARHGEF11/PDZ-RhoGEF and ARHGEF12/LARG) (PubMed:16388592). GNA13-dependent Rho signaling subsequently regulates tra…	sp|P27601|GNA13_MOUSE	sp|P27601|GNA13_MOUSE Guanine nucleotide-binding protein subunit alpha-13 OS=Mus musculus OX=10090 GN=Gna13 PE=1 SV=1	1	8	7	7	23.3	44.054	44366000	117740000	81298000	115550000	97349000	117820000	88597000	81386000	161040000	36149000	66938000	66552000		Quantified
P27612	Phospholipase A-2-activating protein	Plaa	FUNCTION: Plays a role in protein ubiquitination, sorting and degradation through its association with VCP (By similarity). Involved in ubiquitin-mediated membrane proteins trafficking to late endosomes in an ESCRT-dependent manner, and hence plays a role in synaptic vesicle recycling (PubMed:28413018). May play a role in macroautophagy, regulating for instance the clearance of damaged lysosomes …	sp|P27612|PLAP_MOUSE	sp|P27612|PLAP_MOUSE Phospholipase A-2-activating protein OS=Mus musculus OX=10090 GN=Plaa PE=1 SV=4	1	18	18	18	27.6	87.22	129080000	72168000	99842000	111460000	40580000	86440000	68325000	123990000	121600000	163730000	184430000	99290000		Quantified
P27659	60S ribosomal protein L3	Rpl3	FUNCTION: The L3 protein is a component of the large subunit of cytoplasmic ribosomes. {ECO:0000250|UniProtKB:P39023}.	sp|P27659|RL3_MOUSE	sp|P27659|RL3_MOUSE 60S ribosomal protein L3 OS=Mus musculus OX=10090 GN=Rpl3 PE=1 SV=3	1	13	13	13	40.4	46.109	1229400000	862130000	802390000	1033400000	943750000	1005800000	871460000	820240000	854890000	873640000	869880000	979590000		Quantified
P27773	Protein disulfide-isomerase A3	Pdia3		sp|P27773|PDIA3_MOUSE	sp|P27773|PDIA3_MOUSE Protein disulfide-isomerase A3 OS=Mus musculus OX=10090 GN=Pdia3 PE=1 SV=2	1	2	2	2	4	56.678						24259000	40826000							Quantified
P28271	Cytoplasmic aconitate hydratase	Aco1	FUNCTION: Iron sensor. Binds a 4Fe-4S cluster and functions as aconitase when cellular iron levels are high. Functions as mRNA binding protein that regulates uptake, sequestration and utilization of iron when cellular iron levels are low. Binds to iron-responsive elements (IRES) in target mRNA species when iron levels are low. Binding of a 4Fe-4S cluster precludes RNA binding. {ECO:0000250|UniPro…	sp|P28271|ACOC_MOUSE;sp|Q811J3|IREB2_MOUSE	sp|P28271|ACOC_MOUSE Cytoplasmic aconitate hydratase OS=Mus musculus OX=10090 GN=Aco1 PE=1 SV=3	2	7	7	7	10.2	98.124	79275000	114940000	55546000	37110000	70975000	134560000	38558000	42830000	95485000	44307000	64037000	38457000		Quantified
P28650	Adenylosuccinate synthetase isozyme 1	Adss1	FUNCTION: Component of the purine nucleotide cycle (PNC), which interconverts IMP and AMP to regulate the nucleotide levels in various tissues, and which contributes to glycolysis and ammoniagenesis. Catalyzes the first committed step in the biosynthesis of AMP from IMP. {ECO:0000269|PubMed:12482871}.	sp|P28650|PURA1_MOUSE	sp|P28650|PURA1_MOUSE Adenylosuccinate synthetase isozyme 1 OS=Mus musculus OX=10090 GN=Adss1 PE=1 SV=2	1	7	7	7	20.4	50.254	160950000	180820000	209210000	107430000	113570000	123790000	66577000	145070000	149500000	192670000	186020000	132300000		Quantified
P28653	Biglycan	Bgn	FUNCTION: May be involved in collagen fiber assembly. {ECO:0000250}.	sp|P28653|PGS1_MOUSE	sp|P28653|PGS1_MOUSE Biglycan OS=Mus musculus OX=10090 GN=Bgn PE=1 SV=1	1	2	2	2	8.9	41.639	43121000	79236000	67748000	45901000		55198000	36230000	65491000		51856000				Quantified
P28654	Decorin	Dcn	FUNCTION: May affect the rate of fibrils formation.	sp|P28654|PGS2_MOUSE	sp|P28654|PGS2_MOUSE Decorin OS=Mus musculus OX=10090 GN=Dcn PE=1 SV=1	1	8	8	8	26.8	39.809	66985000	106820000	95975000	104090000	101450000	167030000	363280000	133830000	106710000	42536000	159760000	107860000		Quantified
P28660	Nck-associated protein 1	Nckap1	FUNCTION: Part of the WAVE complex that regulates lamellipodia formation. The WAVE complex regulates actin filament reorganization via its interaction with the Arp2/3 complex. Actin remodeling activity is regulated by RAC1. As component of the WAVE1 complex, required for BDNF-NTRK2 endocytic trafficking and signaling from early endosomes (PubMed:27605705). {ECO:0000269|PubMed:14765121, ECO:000026…	sp|P28660|NCKP1_MOUSE	sp|P28660|NCKP1_MOUSE Nck-associated protein 1 OS=Mus musculus OX=10090 GN=Nckap1 PE=1 SV=2	1	2	2	2	2.3	128.78	12016000	10929000		6839500					10711000			10532000		Quantified
P29341	Polyadenylate-binding protein 1	Pabpc1	FUNCTION: Binds the poly(A) tail of mRNA, including that of its own transcript, and regulates processes of mRNA metabolism such as pre-mRNA splicing and mRNA stability. Its function in translational initiation regulation can either be enhanced by PAIP1 or repressed by PAIP2. Can probably bind to cytoplasmic RNA sequences other than poly(A) in vivo. Involved in translationally coupled mRNA turnove…	sp|P29341|PABP1_MOUSE	sp|P29341|PABP1_MOUSE Polyadenylate-binding protein 1 OS=Mus musculus OX=10090 GN=Pabpc1 PE=1 SV=2	1	1	1	1	2.7	70.67	8494800			11576000		11266000	14310000	12348000		14799000	13842000	7718700		Quantified
P29699	Alpha-2-HS-glycoprotein	Ahsg	FUNCTION: Probably involved in differentiation.	sp|P29699|FETUA_MOUSE	sp|P29699|FETUA_MOUSE Alpha-2-HS-glycoprotein OS=Mus musculus OX=10090 GN=Ahsg PE=1 SV=1	1	5	5	5	23.2	37.325	73217000	104040000	73642000	107510000	108450000	74510000	104520000	169420000	191930000	218380000	210430000	128550000		Quantified
P29758	Ornithine aminotransferase, mitochondrial	Oat		sp|P29758|OAT_MOUSE	sp|P29758|OAT_MOUSE Ornithine aminotransferase, mitochondrial OS=Mus musculus OX=10090 GN=Oat PE=1 SV=1	1	3	3	3	8.7	48.354	22468000	27125000	17384000	27143000	21963000	26289000	49534000	26012000	26682000	22891000		26643000		Quantified
P29788	Vitronectin	Vtn	FUNCTION: Vitronectin is a cell adhesion and spreading factor found in serum and tissues. Vitronectin interact with glycosaminoglycans and proteoglycans. Is recognized by certain members of the integrin family and serves as a cell-to-substrate adhesion molecule. Inhibitor of the membrane-damaging effect of the terminal cytolytic complement pathway.	sp|P29788|VTNC_MOUSE	sp|P29788|VTNC_MOUSE Vitronectin OS=Mus musculus OX=10090 GN=Vtn PE=1 SV=2	1	3	3	3	10	54.848				13215000	23175000	13108000	15451000	17467000						Quantified
P30416	Peptidyl-prolyl cis-trans isomerase FKBP4	Fkbp4	FUNCTION: Immunophilin protein with PPIase and co-chaperone activities. Component of steroid receptors heterocomplexes through interaction with heat-shock protein 90 (HSP90). May play a role in the intracellular trafficking of heterooligomeric forms of steroid hormone receptors between cytoplasm and nuclear compartments. The isomerase activity controls neuronal growth cones via regulation of TRPC…	sp|P30416|FKBP4_MOUSE	sp|P30416|FKBP4_MOUSE Peptidyl-prolyl cis-trans isomerase FKBP4 OS=Mus musculus OX=10090 GN=Fkbp4 PE=1 SV=5	1	6	6	6	16.8	51.572	25477000		38696000	48297000	66310000	23204000			85762000	31179000	32485000	32635000		Quantified
P30999	Catenin delta-1	Ctnnd1	FUNCTION: Key regulator of cell-cell adhesion that associates with and regulates the cell adhesion properties of both C-, E- and N-cadherins, being critical for their surface stability. Beside cell-cell adhesion, regulates gene transcription through several transcription factors including ZBTB33/Kaiso2 and GLIS2, and the activity of Rho family GTPases and downstream cytoskeletal dynamics. Implica…	sp|P30999|CTND1_MOUSE	sp|P30999|CTND1_MOUSE Catenin delta-1 OS=Mus musculus OX=10090 GN=Ctnnd1 PE=1 SV=2	1	10	10	10	16.2	104.92	117310000	93419000	82994000	88825000	106210000	75007000	82999000	82898000	157080000	97100000		74037000		Quantified
P31001	Desmin	Des	FUNCTION: Muscle-specific type III intermediate filament essential for proper muscular structure and function. Plays a crucial role in maintaining the structure of sarcomeres, inter-connecting the Z-disks and forming the myofibrils, linking them not only to the sarcolemmal cytoskeleton, but also to the nucleus and mitochondria, thus providing strength for the muscle fiber during activity (By simi…	sp|P31001|DESM_MOUSE	sp|P31001|DESM_MOUSE Desmin OS=Mus musculus OX=10090 GN=Des PE=1 SV=3	1	30	26	26	68	53.497	6405400000	5322500000	6209200000	6549600000	6320400000	9550500000	11449000000	7118900000	3499100000	3737300000	4404500000	2927700000		Quantified
P31230	Aminoacyl tRNA synthase complex-interacting multifunctional protein 1	Aimp1	FUNCTION: Non-catalytic component of the multisynthase complex (PubMed:12060739). Stimulates the catalytic activity of cytoplasmic arginyl-tRNA synthase (By similarity). Binds tRNA. Possesses inflammatory cytokine activity (PubMed:1400342, PubMed:7545917). Negatively regulates TGF-beta signaling through stabilization of SMURF2 by binding to SMURF2 and inhibiting its SMAD7-mediated degradation (Pu…	sp|P31230|AIMP1_MOUSE	sp|P31230|AIMP1_MOUSE Aminoacyl tRNA synthase complex-interacting multifunctional protein 1 OS=Mus musculus OX=10090 GN=Aimp1 PE=1 SV=2	1	8	8	8	34.5	33.997	84490000	92583000	91728000	87831000	85874000	72186000	61279000	62910000	106580000	99807000	73103000	59940000		Quantified
P31750	RAC-alpha serine/threonine-protein kinase	Akt1	FUNCTION: AKT1 is one of 3 closely related serine/threonine-protein kinases (AKT1, AKT2 and AKT3) called the AKT kinase, and which regulate many processes including metabolism, proliferation, cell survival, growth and angiogenesis. This is mediated through serine and/or threonine phosphorylation of a range of downstream substrates. Over 100 substrate candidates have been reported so far, but for …	sp|P31750|AKT1_MOUSE;sp|Q60823|AKT2_MOUSE;sp|Q9WUA6|AKT3_MOUSE	sp|P31750|AKT1_MOUSE RAC-alpha serine/threonine-protein kinase OS=Mus musculus OX=10090 GN=Akt1 PE=1 SV=2	3	7	7	7	16.7	55.707	37056000	55781000	50223000	52584000	55265000			32635000	65850000	79408000	35938000	58777000		Quantified
P31938	Dual specificity mitogen-activated protein kinase kinase 1	Map2k1	FUNCTION: Dual specificity protein kinase which acts as an essential component of the MAP kinase signal transduction pathway. Binding of extracellular ligands such as growth factors, cytokines and hormones to their cell-surface receptors activates RAS and this initiates RAF1 activation. RAF1 then further activates the dual-specificity protein kinases MAP2K1/MEK1 and MAP2K2/MEK2. Both MAP2K1/MEK1 …	sp|P31938|MP2K1_MOUSE	sp|P31938|MP2K1_MOUSE Dual specificity mitogen-activated protein kinase kinase 1 OS=Mus musculus OX=10090 GN=Map2k1 PE=1 SV=2	1	8	8	4	28	43.474	264980000	421200000	493590000	232500000	306920000	226140000	350650000	392790000	449020000	420640000	370110000	295930000		Quantified
P32020	Non-specific lipid-transfer protein	Scp2	FUNCTION: Mediates in vitro the transfer of all common phospholipids, cholesterol and gangliosides between membranes. May play a role in regulating steroidogenesis.	sp|P32020|NLTP_MOUSE	sp|P32020|NLTP_MOUSE Non-specific lipid-transfer protein OS=Mus musculus OX=10090 GN=Scp2 PE=1 SV=3	1	9	9	9	19.7	59.125	62423000	82358000	85171000	83334000	114310000	100990000	74535000	97041000	87744000	99922000	94292000	121950000		Quantified
P32233	Developmentally-regulated GTP-binding protein 1	Drg1	FUNCTION: Catalyzes the conversion of GTP to GDP through hydrolysis of the gamma-phosphate bond in GTP. Appears to have an intrinsic GTPase activity that is stimulated by ZC3H15/DFRP1 binding likely by increasing the affinity for the potassium ions. When hydroxylated at C-3 of 'Lys-22' by JMJD7, may bind to RNA and play a role in translation. Binds to microtubules and promotes microtubule polymer…	sp|P32233|DRG1_MOUSE	sp|P32233|DRG1_MOUSE Developmentally-regulated GTP-binding protein 1 OS=Mus musculus OX=10090 GN=Drg1 PE=1 SV=1	1	3	3	3	10.1	40.512				32263000	30761000	24537000		24499000		29907000	28051000			Quantified
P32261	Antithrombin-III	Serpinc1	FUNCTION: Most important serine protease inhibitor in plasma that regulates the blood coagulation cascade. AT-III inhibits thrombin, matriptase-3/TMPRSS7, as well as factors IXa, Xa and XIa. Its inhibitory activity is greatly enhanced in the presence of heparin (By similarity). {ECO:0000250}.	sp|P32261|ANT3_MOUSE	sp|P32261|ANT3_MOUSE Antithrombin-III OS=Mus musculus OX=10090 GN=Serpinc1 PE=1 SV=1	1	6	2	2	13.8	52.003	117970000	56405000	73070000	69974000	84787000	122460000	109390000	74653000	60534000	60504000	128290000	85885000		Quantified
P32921	Tryptophan--tRNA ligase, cytoplasmic	Wars1	FUNCTION: T1-TrpRS has aminoacylation activity while T2-TrpRS lacks it. T1-TrpRS and T2-TrpRS possess angiostatic activity. T2-TrpRS inhibits fluid shear stress-activated responses of endothelial cells. Regulates ERK, Akt, and eNOS activation pathways that are associated with angiogenesis, cytoskeletal reorganization and shear stress-responsive gene expression (By similarity). {ECO:0000250|UniPro…	sp|P32921|SYWC_MOUSE	sp|P32921|SYWC_MOUSE Tryptophan--tRNA ligase, cytoplasmic OS=Mus musculus OX=10090 GN=Wars1 PE=1 SV=2	1	17	17	17	50.5	54.357	800460000	717430000	738370000	776100000	543830000	551450000	424150000	692360000	711180000	822960000	763140000	620170000		Quantified
P34884	Macrophage migration inhibitory factor	Mif	FUNCTION: Pro-inflammatory cytokine. Involved in the innate immune response to bacterial pathogens. The expression of MIF at sites of inflammation suggests a role as mediator in regulating the function of macrophages in host defense. Counteracts the anti-inflammatory activity of glucocorticoids. Has phenylpyruvate tautomerase and dopachrome tautomerase activity (in vitro), but the physiological s…	sp|P34884|MIF_MOUSE	sp|P34884|MIF_MOUSE Macrophage migration inhibitory factor OS=Mus musculus OX=10090 GN=Mif PE=1 SV=2	1	3	3	3	35.7	12.504	260310000	247200000	280190000	206760000	193600000	247660000	104890000	276760000	311000000	366180000	374130000	262720000		Quantified
P34914	Bifunctional epoxide hydrolase 2	Ephx2	FUNCTION: Bifunctional enzyme. The C-terminal domain has epoxide hydrolase activity and acts on epoxides (alkene oxides, oxiranes) and arene oxides (PubMed:7840649, PubMed:21217101). Plays a role in xenobiotic metabolism by degrading potentially toxic epoxides (By similarity). Also determines steady-state levels of physiological mediators (By similarity). {ECO:0000250|UniProtKB:P34913, ECO:000025…	sp|P34914|HYES_MOUSE	sp|P34914|HYES_MOUSE Bifunctional epoxide hydrolase 2 OS=Mus musculus OX=10090 GN=Ephx2 PE=1 SV=2	1	23	23	23	60.6	62.515	1038900000	1488200000	2616800000	1406200000	781630000	2850100000	737200000	1799800000	995840000	2615200000	995740000	1092100000		Quantified
P35235	Tyrosine-protein phosphatase non-receptor type 11	Ptpn11	FUNCTION: Acts downstream of various receptor and cytoplasmic protein tyrosine kinases to participate in the signal transduction from the cell surface to the nucleus (PubMed:14967142). Positively regulates MAPK signal transduction pathway (By similarity). Dephosphorylates GAB1, ARHGAP35 and EGFR (By similarity). Dephosphorylates ROCK2 at 'Tyr-722' resulting in stimulation of its RhoA binding acti…	sp|P35235|PTN11_MOUSE	sp|P35235|PTN11_MOUSE Tyrosine-protein phosphatase non-receptor type 11 OS=Mus musculus OX=10090 GN=Ptpn11 PE=1 SV=3	1	13	13	13	23.9	68.034	106700000	103340000	117580000	106610000	148000000	119620000	41629000	54782000	126680000	128730000	165210000	124860000		Quantified
P35278	Ras-related protein Rab-5C	Rab5c	FUNCTION: Protein transport. Probably involved in vesicular traffic (By similarity). {ECO:0000250}.	sp|P35278|RAB5C_MOUSE	sp|P35278|RAB5C_MOUSE Ras-related protein Rab-5C OS=Mus musculus OX=10090 GN=Rab5c PE=1 SV=2	1	9	9	6	60.6	23.412	594220000	504070000	455140000	488520000	431460000	563070000	468000000	654560000	481850000	415060000	440290000	409320000		Quantified
P35279	Ras-related protein Rab-6A	Rab6a	FUNCTION: Protein transport. Regulator of membrane traffic from the Golgi apparatus towards the endoplasmic reticulum (ER). Involved in COPI-independent retrograde transport from the Golgi to the ER (By similarity). {ECO:0000250|UniProtKB:P20340}.	sp|P35279|RAB6A_MOUSE	sp|P35279|RAB6A_MOUSE Ras-related protein Rab-6A OS=Mus musculus OX=10090 GN=Rab6a PE=1 SV=4	1	9	9	5	53.4	23.59	1037600000	1044100000	939950000	1236200000	1130700000	988220000	885980000	1164200000	1020000000	1025500000	847620000	1036700000		Quantified
P35282	Ras-related protein Rab-21	Rab21	FUNCTION: Regulates integrin internalization and recycling, but does not influence the traffic of endosomally translocated receptors in general (PubMed:16754960). As a result, may regulate cell adhesion and migration (PubMed:16754960). During the mitosis of adherent cells, controls the endosomal trafficking of integrins which is required for the successful completion of cytokinesis (PubMed:188044…	sp|P35282|RAB21_MOUSE	sp|P35282|RAB21_MOUSE Ras-related protein Rab-21 OS=Mus musculus OX=10090 GN=Rab21 PE=1 SV=4	1	10	10	10	58.6	24.106	2813700000	2419700000	3526300000	2773000000	3568200000	3330600000	1848900000	3295700000	2744800000	3171800000	3097700000	2569600000		Quantified
P35283	Ras-related protein Rab-12	Rab12	FUNCTION: The small GTPases Rab are key regulators of intracellular membrane trafficking, from the formation of transport vesicles to their fusion with membranes. Rabs cycle between an inactive GDP-bound form and an active GTP-bound form that is able to recruit to membranes different set of downstream effectors directly responsible for vesicle formation, movement, tethering and fusion (By similar…	sp|P35283|RAB12_MOUSE	sp|P35283|RAB12_MOUSE Ras-related protein Rab-12 OS=Mus musculus OX=10090 GN=Rab12 PE=1 SV=3	1	10	10	10	44.4	27.328	621980000	589700000	522540000	608940000	675880000	680000000	540900000	669300000	596710000	614220000	581390000	699830000		Quantified
P35285	Ras-related protein Rab-22A	Rab22a	FUNCTION: Plays a role in endocytosis and intracellular protein transport (PubMed:19759177, PubMed:27718357). Mediates trafficking of TF from early endosomes to recycling endosomes. Required for NGF-mediated endocytosis of NTRK1, and subsequent neurite outgrowth. Binds GTP and GDP and has low GTPase activity. Alternates between a GTP-bound active form and a GDP-bound inactive form (By similarity)…	sp|P35285|RB22A_MOUSE	sp|P35285|RB22A_MOUSE Ras-related protein Rab-22A OS=Mus musculus OX=10090 GN=Rab22a PE=1 SV=2	1	4	4	3	25.8	21.802		24227000		24884000	26308000	21892000	25838000	26182000	30212000		22287000	28762000		Quantified
P35290	Ras-related protein Rab-24	Rab24	FUNCTION: May be involved in autophagy-related processes.	sp|P35290|RAB24_MOUSE	sp|P35290|RAB24_MOUSE Ras-related protein Rab-24 OS=Mus musculus OX=10090 GN=Rab24 PE=1 SV=2	1	2	2	2	11.3	23.144							13207000							Identified
P35293	Ras-related protein Rab-18	Rab18	FUNCTION: Required for the localization of ZFYVE1 to lipid droplets and for its function in mediating the formation of endoplasmic reticulum-lipid droplets (ER-LD) contacts (By similarity). Plays a role in apical endocytosis/recycling (By similarity). Plays a key role in eye and brain development and neurodegeneration (By similarity). {ECO:0000250|UniProtKB:Q8MXS1, ECO:0000250|UniProtKB:Q9NP72}.	sp|P35293|RAB18_MOUSE	sp|P35293|RAB18_MOUSE Ras-related protein Rab-18 OS=Mus musculus OX=10090 GN=Rab18 PE=1 SV=2	1	8	8	8	47.1	23.035	520810000	430460000	463530000	510010000	545320000	633590000	482410000	601430000	469220000	580110000	554700000	569450000		Quantified
P35385	Heat shock protein beta-7	Hspb7		sp|P35385|HSPB7_MOUSE	sp|P35385|HSPB7_MOUSE Heat shock protein beta-7 OS=Mus musculus OX=10090 GN=Hspb7 PE=1 SV=3	1	3	3	3	23.7	18.634											25378000			Identified
P35486	Pyruvate dehydrogenase E1 component subunit alpha, somatic form, mitochondrial	Pdha1	FUNCTION: The pyruvate dehydrogenase complex catalyzes the overall conversion of pyruvate to acetyl-CoA and CO(2), and thereby links the glycolytic pathway to the tricarboxylic cycle. {ECO:0000269|PubMed:11708858, ECO:0000269|PubMed:20841503}.	sp|P35486|ODPA_MOUSE	sp|P35486|ODPA_MOUSE Pyruvate dehydrogenase E1 component subunit alpha, somatic form, mitochondrial OS=Mus musculus OX=10090 GN=Pdha1 PE=1 SV=1	1	24	24	24	74.1	43.231	14344000000	16595000000	16018000000	17198000000	16887000000	18000000000	20243000000	16854000000	18084000000	14511000000	16896000000	16396000000		Quantified
P35550	rRNA 2-O-methyltransferase fibrillarin	Fbl	FUNCTION: S-adenosyl-L-methionine-dependent methyltransferase that has the ability to methylate both RNAs and proteins (PubMed:32017896). Involved in pre-rRNA processing by catalyzing the site-specific 2'-hydroxyl methylation of ribose moieties in pre-ribosomal RNA (By similarity). Site specificity is provided by a guide RNA that base pairs with the substrate (By similarity). Methylation occurs a…	sp|P35550|FBRL_MOUSE	sp|P35550|FBRL_MOUSE rRNA 2-O-methyltransferase fibrillarin OS=Mus musculus OX=10090 GN=Fbl PE=1 SV=2	1	7	7	6	27.8	34.306	85315000	87080000		105320000	61979000	26772000	109620000	75109000	86276000	84814000	89236000	92471000		Quantified
P35564	Calnexin	Canx	FUNCTION: Calcium-binding protein that interacts with newly synthesized glycoproteins in the endoplasmic reticulum. It may act in assisting protein assembly and/or in the retention within the ER of unassembled protein subunits. It seems to play a major role in the quality control apparatus of the ER by the retention of incorrectly folded proteins. Associated with partial T-cell antigen receptor c…	sp|P35564|CALX_MOUSE	sp|P35564|CALX_MOUSE Calnexin OS=Mus musculus OX=10090 GN=Canx PE=1 SV=1	1	14	14	14	33.5	67.277	258720000	227050000	264000000	340710000	282810000	263450000	198930000	271130000	198420000	182110000	253460000	242000000		Quantified
P35585	AP-1 complex subunit mu-1	Ap1m1	FUNCTION: Subunit of clathrin-associated adaptor protein complex 1 that plays a role in protein sorting in the trans-Golgi network (TGN) and endosomes. The AP complexes mediate the recruitment of clathrin to membranes and the recognition of sorting signals within the cytosolic tails of transmembrane cargo molecules.	sp|P35585|AP1M1_MOUSE;sp|Q9WVP1|AP1M2_MOUSE	sp|P35585|AP1M1_MOUSE AP-1 complex subunit mu-1 OS=Mus musculus OX=10090 GN=Ap1m1 PE=1 SV=3	2	4	4	4	11.3	48.542				68514000		19485000								Identified
P35700	Peroxiredoxin-1	Prdx1	FUNCTION: Thiol-specific peroxidase that catalyzes the reduction of hydrogen peroxide and organic hydroperoxides to water and alcohols, respectively. Plays a role in cell protection against oxidative stress by detoxifying peroxides and as sensor of hydrogen peroxide-mediated signaling events. Might participate in the signaling cascades of growth factors and tumor necrosis factor-alpha by regulati…	sp|P35700|PRDX1_MOUSE	sp|P35700|PRDX1_MOUSE Peroxiredoxin-1 OS=Mus musculus OX=10090 GN=Prdx1 PE=1 SV=1	1	12	12	11	66.8	22.176	1536100000	1577600000	1577800000	1796000000	1590400000	1777700000	1422500000	1302800000	1516900000	1780000000	1602800000	1297100000		Quantified
P35979	60S ribosomal protein L12	Rpl12	FUNCTION: Binds directly to 26S ribosomal RNA.	sp|P35979|RL12_MOUSE	sp|P35979|RL12_MOUSE 60S ribosomal protein L12 OS=Mus musculus OX=10090 GN=Rpl12 PE=1 SV=2	1	7	7	7	58.8	17.804	1080000000	1335000000	804680000	1240800000	1450100000	988090000	1563200000	1333400000	1279100000	733690000	1227200000	1293200000		Quantified
P35980	60S ribosomal protein L18	Rpl18	FUNCTION: Component of the large ribosomal subunit. {ECO:0000250|UniProtKB:Q07020}.	sp|P35980|RL18_MOUSE	sp|P35980|RL18_MOUSE 60S ribosomal protein L18 OS=Mus musculus OX=10090 GN=Rpl18 PE=1 SV=3	1	6	6	6	33.5	21.644	1967200000	2112200000	1656000000	2966400000	2241800000	2167100000	1746400000	1483400000	1919000000	1500300000	1448800000	2040300000		Quantified
P36371	Antigen peptide transporter 2	Tap2	FUNCTION: Involved in the transport of antigens from the cytoplasm to the endoplasmic reticulum for association with MHC class I molecules. Also acts as a molecular scaffold for the final stage of MHC class I folding, namely the binding of peptide. Nascent MHC class I molecules associate with TAP via tapasin (By similarity). {ECO:0000250}.	sp|P36371|TAP2_MOUSE	sp|P36371|TAP2_MOUSE Antigen peptide transporter 2 OS=Mus musculus OX=10090 GN=Tap2 PE=1 SV=1	1	7	7	7	12.8	77.444	58637000	65201000	35083000	110090000				34586000		27902000	34469000	46492000		Quantified
P36536	GTP-binding protein SAR1a	Sar1a	FUNCTION: Involved in transport from the endoplasmic reticulum to the Golgi apparatus. Required to maintain SEC16A localization at discrete locations on the ER membrane perhaps by preventing its dissociation. SAR1A-GTP-dependent assembly of SEC16A on the ER membrane forms an organized scaffold defining endoplasmic reticulum exit sites (ERES) (By similarity). {ECO:0000250}.	sp|P36536|SAR1A_MOUSE	sp|P36536|SAR1A_MOUSE GTP-binding protein SAR1a OS=Mus musculus OX=10090 GN=Sar1a PE=1 SV=1	1	3	2	2	27.3	22.371	144260000	114280000	171450000	113980000	196470000	229520000	94349000	297240000	136130000	212110000	274140000	144900000		Quantified
P37804	Transgelin	Tagln	FUNCTION: Actin cross-linking/gelling protein. {ECO:0000250}.	sp|P37804|TAGL_MOUSE	sp|P37804|TAGL_MOUSE Transgelin OS=Mus musculus OX=10090 GN=Tagln PE=1 SV=3	1	1	1	1	9	22.576	9455500													Identified
P38060	Hydroxymethylglutaryl-CoA lyase, mitochondrial	Hmgcl	FUNCTION: Mitochondrial 3-hydroxymethyl-3-methylglutaryl-CoA lyase that catalyzes a cation-dependent cleavage of (S)-3-hydroxy-3-methylglutaryl-CoA into acetyl-CoA and acetoacetate, a key step in ketogenesis. Terminal step in leucine catabolism. Ketone bodies (beta-hydroxybutyrate, acetoacetate and acetone) are essential as an alternative source of energy to glucose, as lipid precursors and as re…	sp|P38060|HMGCL_MOUSE;sp|Q8JZS7|HMGC2_MOUSE	sp|P38060|HMGCL_MOUSE Hydroxymethylglutaryl-CoA lyase, mitochondrial OS=Mus musculus OX=10090 GN=Hmgcl PE=1 SV=2	2	9	9	9	37.8	34.238	308340000	258560000	335880000	329200000	355780000	366300000	238460000	345020000	355590000	346120000	296340000	357270000		Quantified
P38647	Stress-70 protein, mitochondrial	Hspa9	FUNCTION: Chaperone protein which plays an important role in mitochondrial iron-sulfur cluster (ISC) biogenesis (PubMed:26702583). Interacts with and stabilizes ISC cluster assembly proteins FXN, NFU1, NFS1 and ISCU (By similarity). Regulates erythropoiesis via stabilization of ISC assembly (PubMed:21123823). May play a role in the control of cell proliferation and cellular aging (PubMed:8454632)…	sp|P38647|GRP75_MOUSE	sp|P38647|GRP75_MOUSE Stress-70 protein, mitochondrial OS=Mus musculus OX=10090 GN=Hspa9 PE=1 SV=3	1	31	31	31	58.8	73.46	5317400000	5709700000	5980600000	5305300000	5464800000	5847200000	5969400000	5518600000	4979400000	5621400000	5762500000	8967400000		Quantified
P39054	Dynamin-2	Dnm2	FUNCTION: Microtubule-associated force-producing protein involved in producing microtubule bundles and able to bind and hydrolyze GTP. Plays a role in the regulation of neuron morphology, axon growth and formation of neuronal growth cones (By similarity). Plays an important role in vesicular trafficking processes, in particular endocytosis. Involved in cytokinesis (PubMed:18923138). Regulates mat…	sp|P39054|DYN2_MOUSE	sp|P39054|DYN2_MOUSE Dynamin-2 OS=Mus musculus OX=10090 GN=Dnm2 PE=1 SV=2	1	15	15	8	19	98.144	328180000	330790000	332430000	371680000	283370000	354190000	255640000	335130000	317680000	367480000	324660000	405620000		Quantified
P39447	Tight junction protein ZO-1	Tjp1	FUNCTION: Tjp1, TjpP2, and Tjp3 are closely related scaffolding proteins that link tight junction (TJ) transmembrane proteins such as claudins, junctional adhesion molecules, and occludin to the actin cytoskeleton (By similarity). The tight junction acts to limit movement of substances through the paracellular space and as a boundary between the compositionally distinct apical and basolateral pla…	sp|P39447|ZO1_MOUSE	sp|P39447|ZO1_MOUSE Tight junction protein ZO-1 OS=Mus musculus OX=10090 GN=Tjp1 PE=1 SV=2	1	4	4	4	2.3	194.74				18674000	25580000	30947000	14906000							Quantified
P40336	Vacuolar protein sorting-associated protein 26A	Vps26a	FUNCTION: Acts as component of the retromer cargo-selective complex (CSC). The CSC is believed to be the core functional component of retromer or respective retromer complex variants acting to prevent missorting of selected transmembrane cargo proteins into the lysosomal degradation pathway. The recruitment of the CSC to the endosomal membrane involves RAB7A and SNX3.The SNX-BAR retromer mediates…	sp|P40336|VP26A_MOUSE	sp|P40336|VP26A_MOUSE Vacuolar protein sorting-associated protein 26A OS=Mus musculus OX=10090 GN=Vps26a PE=1 SV=1	1	10	10	10	42.2	38.113	102260000	109240000	68865000	115960000	91386000	111150000	102020000	101630000	114120000	97791000		137130000		Quantified
P40630	Transcription factor A, mitochondrial	Tfam	FUNCTION: Binds to the mitochondrial light strand promoter and functions in mitochondrial transcription regulation. Component of the mitochondrial transcription initiation complex, composed at least of TFB2M, TFAM and POLRMT that is required for basal transcription of mitochondrial DNA. In this complex, TFAM recruits POLRMT to a specific promoter whereas TFB2M induces structural changes in POLRMT…	sp|P40630|TFAM_MOUSE	sp|P40630|TFAM_MOUSE Transcription factor A, mitochondrial OS=Mus musculus OX=10090 GN=Tfam PE=1 SV=2	1	3	3	3	13.2	27.987	16221000	21169000	15193000			12141000		13382000	13313000					Quantified
P41105	60S ribosomal protein L28	Rpl28	FUNCTION: Component of the large ribosomal subunit. {ECO:0000250|UniProtKB:P46779}.	sp|P41105|RL28_MOUSE	sp|P41105|RL28_MOUSE 60S ribosomal protein L28 OS=Mus musculus OX=10090 GN=Rpl28 PE=1 SV=2	1	7	7	7	40.1	15.733	1231900000	787630000	1228200000	1400800000	1281100000	1667400000	1369700000	1296900000	1143600000	1188900000	1111900000	1461300000		Quantified
P41216	Long-chain-fatty-acid--CoA ligase 1	Acsl1	FUNCTION: Catalyzes the conversion of long-chain fatty acids to their active form acyl-CoAs for both synthesis of cellular lipids, and degradation via beta-oxidation (By similarity). Preferentially uses palmitoleate, oleate and linoleate (By similarity). Preferentially activates arachidonate than epoxyeicosatrienoic acids (EETs) or hydroxyeicosatrienoic acids (HETEs). {ECO:0000250|UniProtKB:P1816…	sp|P41216|ACSL1_MOUSE;sp|Q8JZR0|ACSL5_MOUSE	sp|P41216|ACSL1_MOUSE Long-chain-fatty-acid--CoA ligase 1 OS=Mus musculus OX=10090 GN=Acsl1 PE=1 SV=2	2	37	37	37	58.5	77.951	9543900000	9422000000	10323000000	10191000000	10917000000	12592000000	12226000000	10863000000	9100900000	8642000000	10429000000	9610200000		Quantified
P42125	Enoyl-CoA delta isomerase 1, mitochondrial	Eci1	FUNCTION: Able to isomerize both 3-cis and 3-trans double bonds into the 2-trans form in a range of enoyl-CoA species. {ECO:0000250|UniProtKB:P23965}.	sp|P42125|ECI1_MOUSE	sp|P42125|ECI1_MOUSE Enoyl-CoA delta isomerase 1, mitochondrial OS=Mus musculus OX=10090 GN=Eci1 PE=1 SV=2	1	15	15	15	63.7	32.25	15704000000	16892000000	16009000000	16078000000	14922000000	12647000000	11433000000	13600000000	18111000000	21788000000	17746000000	19929000000		Quantified
P42225	Signal transducer and activator of transcription 1	Stat1	FUNCTION: Signal transducer and transcription activator that mediates cellular responses to interferons (IFNs), cytokine KITLG/SCF and other cytokines and other growth factors. Following type I IFN (IFN-alpha and IFN-beta) binding to cell surface receptors, signaling via protein kinases leads to activation of Jak kinases (TYK2 and JAK1) and to tyrosine phosphorylation of STAT1 and STAT2. The phos…	sp|P42225|STAT1_MOUSE	sp|P42225|STAT1_MOUSE Signal transducer and activator of transcription 1 OS=Mus musculus OX=10090 GN=Stat1 PE=1 SV=1	1	16	16	16	25	87.196	128170000	67884000	106070000	214930000	20594000	44411000	18676000	64581000	37447000			104690000	71068500	Quantified
P42227	Signal transducer and activator of transcription 3	Stat3	FUNCTION: Signal transducer and transcription activator that mediates cellular responses to interleukins, KITLG/SCF, LEP and other growth factors (By similarity). Once activated, recruits coactivators, such as NCOA1 or MED1, to the promoter region of the target gene (By similarity). May mediate cellular responses to activated FGFR1, FGFR2, FGFR3 and FGFR4 (By similarity). Binds to the interleukin…	sp|P42227|STAT3_MOUSE	sp|P42227|STAT3_MOUSE Signal transducer and activator of transcription 3 OS=Mus musculus OX=10090 GN=Stat3 PE=1 SV=2	1	9	9	9	18.3	88.053						43734000				86717000				Identified
P42232	Signal transducer and activator of transcription 5B	Stat5b	FUNCTION: Carries out a dual function: signal transduction and activation of transcription. Mediates cellular responses to the cytokine KITLG/SCF and other growth factors. Binds to the GAS element and activates PRL-induced transcription. Positively regulates hematopoietic/erythroid differentiation. {ECO:0000269|PubMed:7568026}.	sp|P42232|STA5B_MOUSE;sp|P42230|STA5A_MOUSE	sp|P42232|STA5B_MOUSE Signal transducer and activator of transcription 5B OS=Mus musculus OX=10090 GN=Stat5b PE=1 SV=1;sp|P42230|STA5A_MOUSE Signal transducer and activator of transcription 5A OS=Mus musculus OX=10090 GN=Stat5a PE=1 SV=1	2	4	4	4	5.3	90.001		14822000			17215000	14423000	9667300	21983000			14355000	16875000	#REF!	Quantified
P42337	Phosphatidylinositol 4,5-bisphosphate 3-kinase catalytic subunit alpha isoform	Pik3ca	FUNCTION: Phosphoinositide-3-kinase (PI3K) that phosphorylates PtdIns (Phosphatidylinositol), PtdIns4P (Phosphatidylinositol 4-phosphate) and PtdIns(4,5)P2 (Phosphatidylinositol 4,5-bisphosphate) to generate phosphatidylinositol 3,4,5-trisphosphate (PIP3). PIP3 plays a key role by recruiting PH domain-containing proteins to the membrane, including AKT1 and PDPK1, activating signaling cascades inv…	sp|P42337|PK3CA_MOUSE	sp|P42337|PK3CA_MOUSE Phosphatidylinositol 4,5-bisphosphate 3-kinase catalytic subunit alpha isoform OS=Mus musculus OX=10090 GN=Pik3ca PE=1 SV=2	1	1	1	1	1.1	124.41	124550000	183990000	205590000	144850000		254220000	136630000	187660000			86127000	186530000		Quantified
P42669	Transcriptional activator protein Pur-alpha	Pura	FUNCTION: This is a probable transcription activator that specifically binds the purine-rich single strand of the PUR element located upstream of the c-Myc gene. May play a role in the initiation of DNA replication and in recombination.	sp|P42669|PURA_MOUSE	sp|P42669|PURA_MOUSE Transcriptional activator protein Pur-alpha OS=Mus musculus OX=10090 GN=Pura PE=1 SV=1	1	5	5	5	23.7	34.883	348920000	366840000	374950000	416620000	367960000	304590000	379410000	320770000		314770000	250880000	252350000		Quantified
P42925	Peroxisomal membrane protein 2	Pxmp2	FUNCTION: Seems to be involved in pore-forming activity and may contribute to the unspecific permeability of the peroxisomal membrane.	sp|P42925|PXMP2_MOUSE	sp|P42925|PXMP2_MOUSE Peroxisomal membrane protein 2 OS=Mus musculus OX=10090 GN=Pxmp2 PE=1 SV=2	1	2	2	2	10.3	22.265		76739000	76237000	130190000	128240000	75839000	50534000	83721000	59865000	104720000	100740000	81228000		Quantified
P42932	T-complex protein 1 subunit theta	Cct8	FUNCTION: Component of the chaperonin-containing T-complex (TRiC), a molecular chaperone complex that assists the folding of proteins upon ATP hydrolysis. The TRiC complex mediates the folding of WRAP53/TCAB1, thereby regulating telomere maintenance. As part of the TRiC complex may play a role in the assembly of BBSome, a complex involved in ciliogenesis regulating transports vesicles to the cili…	sp|P42932|TCPQ_MOUSE	sp|P42932|TCPQ_MOUSE T-complex protein 1 subunit theta OS=Mus musculus OX=10090 GN=Cct8 PE=1 SV=3	1	22	22	22	44.5	59.555	726090000	833090000	773050000	823300000	729580000	756520000	595250000	684590000	663150000	981880000	742240000	1005100000		Quantified
P43023	Cytochrome c oxidase subunit 6A2, mitochondrial	Cox6a2	FUNCTION: Component of the cytochrome c oxidase, the last enzyme in the mitochondrial electron transport chain which drives oxidative phosphorylation. The respiratory chain contains 3 multisubunit complexes succinate dehydrogenase (complex II, CII), ubiquinol-cytochrome c oxidoreductase (cytochrome b-c1 complex, complex III, CIII) and cytochrome c oxidase (complex IV, CIV), that cooperate to tran…	sp|P43023|CX6A2_MOUSE	sp|P43023|CX6A2_MOUSE Cytochrome c oxidase subunit 6A2, mitochondrial OS=Mus musculus OX=10090 GN=Cox6a2 PE=1 SV=2	1	4	4	4	52.6	10.749	9892800000	7915800000	11844000000	12706000000	14018000000	12099000000	13306000000	13564000000	10752000000	11178000000	12577000000	10950000000		Quantified
P43024	Cytochrome c oxidase subunit 6A1, mitochondrial	Cox6a1	FUNCTION: Component of the cytochrome c oxidase, the last enzyme in the mitochondrial electron transport chain which drives oxidative phosphorylation. The respiratory chain contains 3 multisubunit complexes succinate dehydrogenase (complex II, CII), ubiquinol-cytochrome c oxidoreductase (cytochrome b-c1 complex, complex III, CIII) and cytochrome c oxidase (complex IV, CIV), that cooperate to tran…	sp|P43024|CX6A1_MOUSE	sp|P43024|CX6A1_MOUSE Cytochrome c oxidase subunit 6A1, mitochondrial OS=Mus musculus OX=10090 GN=Cox6a1 PE=1 SV=2	1	2	2	2	40.5	12.352	178910000	135440000	160840000	231680000	360750000	138420000	318330000	241960000	402550000	202740000	414300000	266150000		Quantified
P43274	Histone H1.4	H1-4	FUNCTION: Histone H1 protein binds to linker DNA between nucleosomes forming the macromolecular structure known as the chromatin fiber. Histones H1 are necessary for the condensation of nucleosome chains into higher-order structured fibers. Acts also as a regulator of individual gene transcription through chromatin remodeling, nucleosome spacing and DNA methylation. {ECO:0000269|PubMed:12808097, …	sp|P43274|H14_MOUSE	sp|P43274|H14_MOUSE Histone H1.4 OS=Mus musculus OX=10090 GN=H1-4 PE=1 SV=2	1	11	5	4	33.8	21.977	8528600000	11015000000	6513500000	8149900000	7168100000	5350200000	25109000000	9239900000	6134900000	5629900000	5496500000	8098300000		Quantified
P43275	Histone H1.1	H1-1	FUNCTION: Histone H1 protein binds to linker DNA between nucleosomes forming the macromolecular structure known as the chromatin fiber. Histones H1 are necessary for the condensation of nucleosome chains into higher-order structured fibers. Acts also as a regulator of individual gene transcription through chromatin remodeling, nucleosome spacing and DNA methylation (By similarity). {ECO:0000250}.	sp|P43275|H11_MOUSE	sp|P43275|H11_MOUSE Histone H1.1 OS=Mus musculus OX=10090 GN=H1-1 PE=1 SV=2	1	9	6	6	38	21.785	2254800000	2855800000	1214000000	1189600000	1921900000	1580400000	5977800000	3309700000	1312200000	1536500000	1111300000	1447100000		Quantified
P43276	Histone H1.5	H1-5	FUNCTION: Histone H1 protein binds to linker DNA between nucleosomes forming the macromolecular structure known as the chromatin fiber. Histones H1 are necessary for the condensation of nucleosome chains into higher-order structured fibers. Acts also as a regulator of individual gene transcription through chromatin remodeling, nucleosome spacing and DNA methylation (By similarity). {ECO:0000250}.	sp|P43276|H15_MOUSE	sp|P43276|H15_MOUSE Histone H1.5 OS=Mus musculus OX=10090 GN=H1-5 PE=1 SV=2	1	9	7	7	31.4	22.576	7368700000	9528000000	4423200000	5869300000	4206500000	4371500000	18687000000	8763900000	4292800000	3950100000	3749500000	5524000000		Quantified
P43277	Histone H1.3	H1-3	FUNCTION: Histone H1 protein binds to linker DNA between nucleosomes forming the macromolecular structure known as the chromatin fiber. Histones H1 are necessary for the condensation of nucleosome chains into higher-order structured fibers. Acts also as a regulator of individual gene transcription through chromatin remodeling, nucleosome spacing and DNA methylation (By similarity). {ECO:0000250, …	sp|P43277|H13_MOUSE	sp|P43277|H13_MOUSE Histone H1.3 OS=Mus musculus OX=10090 GN=H1-3 PE=1 SV=2	1	10	1	1	31.7	22.099	805910000	840030000	559600000	588230000	587830000	656020000	2197500000	943520000	405490000	599190000	437040000	512820000		Quantified
P43883	Perilipin-2	Plin2	FUNCTION: May be involved in development and maintenance of adipose tissue. {ECO:0000305|PubMed:1518805}.	sp|P43883|PLIN2_MOUSE	sp|P43883|PLIN2_MOUSE Perilipin-2 OS=Mus musculus OX=10090 GN=Plin2 PE=1 SV=2	1	7	7	7	24.2	46.646	41823000	44578000	68171000	51134000	40330000	54069000	51947000	50788000	40062000	46774000	63342000	54707000		Quantified
P45376	Aldo-keto reductase family 1 member B1	Akr1b1	FUNCTION: Catalyzes the NADPH-dependent reduction of a wide variety of carbonyl-containing compounds to their corresponding alcohols (PubMed:17381426, PubMed:19010934, PubMed:7851421). Displays enzymatic activity towards endogenous metabolites such as aromatic and aliphatic aldehydes, ketones, monosacharides, bile acids and xenobiotics substrates. Key enzyme in the polyol pathway, catalyzes reduc…	sp|P45376|ALDR_MOUSE	sp|P45376|ALDR_MOUSE Aldo-keto reductase family 1 member B1 OS=Mus musculus OX=10090 GN=Akr1b1 PE=1 SV=3	1	10	10	10	42.4	35.732	223050000	169420000	214650000	240420000	214660000	273710000	238830000	250580000	203410000	194510000	224900000	145420000		Quantified
P45591	Cofilin-2	Cfl2	FUNCTION: Controls reversibly actin polymerization and depolymerization in a pH-sensitive manner. It has the ability to bind G- and F-actin in a 1:1 ratio of cofilin to actin. It is the major component of intranuclear and cytoplasmic actin rods. Required for muscle maintenance. May play a role during the exchange of alpha-actin forms during the early postnatal remodeling of the sarcomere. {ECO:00…	sp|P45591|COF2_MOUSE	sp|P45591|COF2_MOUSE Cofilin-2 OS=Mus musculus OX=10090 GN=Cfl2 PE=1 SV=1	1	13	11	11	73.5	18.709	570940000	543330000	676510000	624980000	479610000	507330000	274970000	736420000	678810000	819330000	883650000	584820000		Quantified
P45952	Medium-chain specific acyl-CoA dehydrogenase, mitochondrial	Acadm	FUNCTION: Acyl-CoA dehydrogenase specific for acyl chain lengths of 4 to 16 that catalyzes the initial step of fatty acid beta-oxidation. Utilizes the electron transfer flavoprotein (ETF) as an electron acceptor to transfer electrons to the main mitochondrial respiratory chain via ETF-ubiquinone oxidoreductase (ETF dehydrogenase). {ECO:0000250|UniProtKB:P11310}.	sp|P45952|ACADM_MOUSE	sp|P45952|ACADM_MOUSE Medium-chain specific acyl-CoA dehydrogenase, mitochondrial OS=Mus musculus OX=10090 GN=Acadm PE=1 SV=1	1	23	23	23	58.4	46.481	34807000000	37818000000	35825000000	30703000000	37603000000	36144000000	33276000000	34525000000	41105000000	38411000000	36472000000	42338000000		Quantified
P46460	Vesicle-fusing ATPase	Nsf	FUNCTION: Required for vesicle-mediated transport. Catalyzes the fusion of transport vesicles within the Golgi cisternae. Is also required for transport from the endoplasmic reticulum to the Golgi stack. Seems to function as a fusion protein required for the delivery of cargo proteins to all compartments of the Golgi stack GRIA2 leads to influence GRIA2 membrane cycling (By similarity). {ECO:0000…	sp|P46460|NSF_MOUSE	sp|P46460|NSF_MOUSE Vesicle-fusing ATPase OS=Mus musculus OX=10090 GN=Nsf PE=1 SV=2	1	16	16	16	25.5	82.613	207090000	293280000	201680000	240970000	262670000	205070000	205160000	261140000	288080000	237700000	364850000	212680000		Quantified
P46471	26S proteasome regulatory subunit 7	Psmc2	FUNCTION: Component of the 26S proteasome, a multiprotein complex involved in the ATP-dependent degradation of ubiquitinated proteins. This complex plays a key role in the maintenance of protein homeostasis by removing misfolded or damaged proteins, which could impair cellular functions, and by removing proteins whose functions are no longer required. Therefore, the proteasome participates in num…	sp|P46471|PRS7_MOUSE	sp|P46471|PRS7_MOUSE 26S proteasome regulatory subunit 7 OS=Mus musculus OX=10090 GN=Psmc2 PE=1 SV=5	1	13	13	13	37.6	48.647	72183000	92383000	130420000	120890000	72201000	86650000	85268000	88676000	89550000	99536000	127950000	88224000		Quantified
P46638	Ras-related protein Rab-11B	Rab11b	FUNCTION: The small GTPases Rab are key regulators of intracellular membrane trafficking, from the formation of transport vesicles to their fusion with membranes. Rabs cycle between an inactive GDP-bound form and an active GTP-bound form that is able to recruit to membranes different set of downstream effectors directly responsible for vesicle formation, movement, tethering and fusion. The small …	sp|P46638|RB11B_MOUSE;sp|P62492|RB11A_MOUSE;sp|Q9WTL2|RAB25_MOUSE	sp|P46638|RB11B_MOUSE Ras-related protein Rab-11B OS=Mus musculus OX=10090 GN=Rab11b PE=1 SV=3;sp|P62492|RB11A_MOUSE Ras-related protein Rab-11A OS=Mus musculus OX=10090 GN=Rab11a PE=1 SV=3	3	13	13	13	61.5	24.489	2407600000	2505600000	2212400000	2135500000	2422900000	2370900000	1833900000	2034200000	2461900000	2119700000	2011300000	2930200000		Quantified
P46735	Unconventional myosin-Ib	Myo1b	FUNCTION: Motor protein that may participate in process critical to neuronal development and function such as cell migration, neurite outgrowth and vesicular transport.	sp|P46735|MYO1B_MOUSE;sp|Q9D6A1|MYO1H_MOUSE	sp|P46735|MYO1B_MOUSE Unconventional myosin-Ib OS=Mus musculus OX=10090 GN=Myo1b PE=1 SV=3	2	38	38	35	39.3	128.56	1448500000	1717700000	1154300000	942060000	1759300000	1334400000	3331300000	1416800000	1336300000	1046300000	1043100000	1390900000		Quantified
P46737	Lys-63-specific deubiquitinase BRCC36	Brcc3	FUNCTION: Metalloprotease that specifically cleaves 'Lys-63'-linked polyubiquitin chains. Does not have activity toward 'Lys-48'-linked polyubiquitin chains. Component of the BRCA1-A complex, a complex that specifically recognizes 'Lys-63'-linked ubiquitinated histones H2A and H2AX at DNA lesions sites, leading to target the BRCA1-BARD1 heterodimer to sites of DNA damage at double-strand breaks (…	sp|P46737|BRCC3_MOUSE	sp|P46737|BRCC3_MOUSE Lys-63-specific deubiquitinase BRCC36 OS=Mus musculus OX=10090 GN=Brcc3 PE=1 SV=1	1	1	1	1	2.4	33.34				12818000	13628000		12742000	11016000	23098000	12431000	13456000	10816000		Quantified
P46935	E3 ubiquitin-protein ligase NEDD4	Nedd4	FUNCTION: E3 ubiquitin-protein ligase which accepts ubiquitin from an E2 ubiquitin-conjugating enzyme in the form of a thioester and then directly transfers the ubiquitin to targeted substrates. Specifically ubiquitinates 'Lys-63' in target proteins (By similarity). Monoubiquitinates IGF1R at multiple sites, thus leading to receptor internalization and degradation in lysosomes. Ubiquitinates FGFR…	sp|P46935|NEDD4_MOUSE	sp|P46935|NEDD4_MOUSE E3 ubiquitin-protein ligase NEDD4 OS=Mus musculus OX=10090 GN=Nedd4 PE=1 SV=3	1	11	11	10	14.2	102.71	240990000	268310000	263060000	292010000	171140000	307690000	227650000	301300000	340310000	389380000	316000000	298030000		Quantified
P46978	Dolichyl-diphosphooligosaccharide--protein glycosyltransferase subunit STT3A	Stt3a	FUNCTION: Catalytic subunit of the oligosaccharyl transferase (OST) complex that catalyzes the initial transfer of a defined glycan (Glc(3)Man(9)GlcNAc(2) in eukaryotes) from the lipid carrier dolichol-pyrophosphate to an asparagine residue within an Asn-X-Ser/Thr consensus motif in nascent polypeptide chains, the first step in protein N-glycosylation. N-glycosylation occurs cotranslationally and…	sp|P46978|STT3A_MOUSE	sp|P46978|STT3A_MOUSE Dolichyl-diphosphooligosaccharide--protein glycosyltransferase subunit STT3A OS=Mus musculus OX=10090 GN=Stt3a PE=1 SV=1	1	7	7	7	11.2	80.597	91029000	103000000	117700000	160280000	131070000	143600000	70118000	137530000	90369000	103230000	134630000	97002000		Quantified
P47199	Quinone oxidoreductase	Cryz	FUNCTION: Does not have alcohol dehydrogenase activity. Binds NADP and acts through a one-electron transfer process. Orthoquinones, such as 1,2-naphthoquinone or 9,10-phenanthrenequinone, are the best substrates (in vitro). May act in the detoxification of xenobiotics. Interacts with (AU)-rich elements (ARE) in the 3'-UTR of target mRNA species and enhances their stability. NADPH binding interfer…	sp|P47199|QOR_MOUSE	sp|P47199|QOR_MOUSE Quinone oxidoreductase OS=Mus musculus OX=10090 GN=Cryz PE=1 SV=1	1	6	6	6	28.4	35.268	45120000	29189000	61389000	35694000	40949000	44636000	28896000	44555000	32085000	37522000	39727000	21772000		Quantified
P47738	Aldehyde dehydrogenase, mitochondrial	Aldh2	FUNCTION: Is capable of converting retinaldehyde to retinoic acid.	sp|P47738|ALDH2_MOUSE;sp|P24549|AL1A1_MOUSE;sp|O35945|AL1A7_MOUSE	sp|P47738|ALDH2_MOUSE Aldehyde dehydrogenase, mitochondrial OS=Mus musculus OX=10090 GN=Aldh2 PE=1 SV=1	3	16	15	14	38.7	56.537	830980000	1053600000	880510000	914970000	1108400000	985660000	885440000	909950000	882810000	834140000	937370000	1185300000		Quantified
P47740	Aldehyde dehydrogenase family 3 member A2	Aldh3a2	FUNCTION: Catalyzes the oxidation of medium and long-chain aliphatic aldehydes to fatty acids. Active on a variety of saturated and unsaturated aliphatic aldehydes between 6 and 24 carbons in length (PubMed:25286108). Responsible for conversion of the sphingosine 1-phosphate (S1P) degradation product hexadecenal to hexadecenoic acid (PubMed:25286108). {ECO:0000269|PubMed:25286108}.	sp|P47740|AL3A2_MOUSE	sp|P47740|AL3A2_MOUSE Aldehyde dehydrogenase family 3 member A2 OS=Mus musculus OX=10090 GN=Aldh3a2 PE=1 SV=2	1	3	3	3	7.2	53.97				5200800	7809800	8021900								Identified
P47753	F-actin-capping protein subunit alpha-1	Capza1	FUNCTION: F-actin-capping proteins bind in a Ca(2+)-independent manner to the fast growing ends of actin filaments (barbed end) thereby blocking the exchange of subunits at these ends. Unlike other capping proteins (such as gelsolin and severin), these proteins do not sever actin filaments. May play a role in the formation of epithelial cell junctions. {ECO:0000250|UniProtKB:P52907}.	sp|P47753|CAZA1_MOUSE	sp|P47753|CAZA1_MOUSE F-actin-capping protein subunit alpha-1 OS=Mus musculus OX=10090 GN=Capza1 PE=1 SV=4	1	10	8	8	58.7	32.939	883570000	1428800000	1334200000	774160000	1071900000	1158100000	1673500000	1129900000	1417700000	1106700000	1084800000	1084200000		Quantified
P47754	F-actin-capping protein subunit alpha-2	Capza2	FUNCTION: F-actin-capping proteins bind in a Ca(2+)-independent manner to the fast growing ends of actin filaments (barbed end) thereby blocking the exchange of subunits at these ends. Unlike other capping proteins (such as gelsolin and severin), these proteins do not sever actin filaments.	sp|P47754|CAZA2_MOUSE	sp|P47754|CAZA2_MOUSE F-actin-capping protein subunit alpha-2 OS=Mus musculus OX=10090 GN=Capza2 PE=1 SV=3	1	16	16	14	74.8	32.967	9357000000	11393000000	10700000000	6531200000	10474000000	10094000000	13069000000	9746800000	12574000000	10392000000	9671500000	9425800000		Quantified
P47757	F-actin-capping protein subunit beta	Capzb	FUNCTION: F-actin-capping proteins bind in a Ca(2+)-independent manner to the fast growing ends of actin filaments (barbed end) thereby blocking the exchange of subunits at these ends. Unlike other capping proteins (such as gelsolin and severin), these proteins do not sever actin filaments. Isoform 3 may play a role in spermatogenesis. Alternatively, may play a role in later maturation steps such…	sp|P47757|CAPZB_MOUSE	sp|P47757|CAPZB_MOUSE F-actin-capping protein subunit beta OS=Mus musculus OX=10090 GN=Capzb PE=1 SV=3	1	18	18	18	68.6	31.345	6438500000	8293500000	6703600000	5309900000	9139500000	7978100000	10802000000	8041900000	9330600000	7621100000	7964600000	9355100000		Quantified
P47758	Signal recognition particle receptor subunit beta	Srprb	FUNCTION: Component of the SRP (signal recognition particle) receptor. Ensures, in conjunction with the signal recognition particle, the correct targeting of the nascent secretory proteins to the endoplasmic reticulum membrane system. Has GTPase activity. May mediate the membrane association of SRPR.	sp|P47758|SRPRB_MOUSE	sp|P47758|SRPRB_MOUSE Signal recognition particle receptor subunit beta OS=Mus musculus OX=10090 GN=Srprb PE=1 SV=1	1	7	7	7	37.2	29.579	113290000	69801000	102220000	93808000	102670000	102960000	97659000	154930000	89605000	100170000	170940000	83058000		Quantified
P47802	Metaxin-1	Mtx1	FUNCTION: Involved in transport of proteins into the mitochondrion. Essential for embryonic development. {ECO:0000269|PubMed:9045676}.	sp|P47802|MTX1_MOUSE	sp|P47802|MTX1_MOUSE Metaxin-1 OS=Mus musculus OX=10090 GN=Mtx1 PE=1 SV=1	1	6	6	6	21.1	35.623	184850000	142840000	167740000	215860000	192470000	243420000	126240000	214420000	160030000	234510000	165800000	131870000		Quantified
P47809	Dual specificity mitogen-activated protein kinase kinase 4	Map2k4	FUNCTION: Dual specificity protein kinase which acts as an essential component of the MAP kinase signal transduction pathway. Essential component of the stress-activated protein kinase/c-Jun N-terminal kinase (SAP/JNK) signaling pathway. With MAP2K7/MKK7, is the one of the only known kinase to directly activate the stress-activated protein kinase/c-Jun N-terminal kinases MAPK8/JNK1, MAPK9/JNK2 an…	sp|P47809|MP2K4_MOUSE	sp|P47809|MP2K4_MOUSE Dual specificity mitogen-activated protein kinase kinase 4 OS=Mus musculus OX=10090 GN=Map2k4 PE=1 SV=2	1	5	5	5	16.4	44.113	23700000	25740000	22186000	40086000	34038000	28613000			63411000	28402000	29283000	23711000		Quantified
P47857	ATP-dependent 6-phosphofructokinase, muscle type	Pfkm	FUNCTION: Catalyzes the phosphorylation of D-fructose 6-phosphate to fructose 1,6-bisphosphate by ATP, the first committing step of glycolysis. {ECO:0000255|HAMAP-Rule:MF_03184, ECO:0000269|PubMed:19889946}.	sp|P47857|PFKAM_MOUSE	sp|P47857|PFKAM_MOUSE ATP-dependent 6-phosphofructokinase, muscle type OS=Mus musculus OX=10090 GN=Pfkm PE=1 SV=3	1	33	33	29	57.1	85.268	12158000000	12001000000	13384000000	12525000000	12653000000	14518000000	9476600000	11942000000	13921000000	17362000000	17266000000	12988000000		Quantified
P47911	60S ribosomal protein L6	Rpl6	FUNCTION: Component of the large ribosomal subunit. {ECO:0000250|UniProtKB:Q02878}.	sp|P47911|RL6_MOUSE	sp|P47911|RL6_MOUSE 60S ribosomal protein L6 OS=Mus musculus OX=10090 GN=Rpl6 PE=1 SV=3	1	15	15	15	45.3	33.509	3508600000	3336500000	2539300000	3794500000	2773700000	2948200000	3513100000	2553700000	2719900000	2645800000	2107800000	3005400000		Quantified
P47915	60S ribosomal protein L29	Rpl29	FUNCTION: Component of the large ribosomal subunit. {ECO:0000250|UniProtKB:P47914}.	sp|P47915|RL29_MOUSE	sp|P47915|RL29_MOUSE 60S ribosomal protein L29 OS=Mus musculus OX=10090 GN=Rpl29 PE=1 SV=2	1	1	1	1	6.9	17.587	260880000	361600000		176380000	137640000	179900000	292070000	195060000	202260000		96347000	185310000		Quantified
P47931	Follistatin	Fst	FUNCTION: Binds directly to activin and functions as an activin antagonist. Specific inhibitor of the biosynthesis and secretion of pituitary follicle stimulating hormone (FSH).	sp|P47931|FST_MOUSE	sp|P47931|FST_MOUSE Follistatin OS=Mus musculus OX=10090 GN=Fst PE=2 SV=1	1	1	1	1	7.3	37.866	316650000	398430000	522420000	986210000	496710000	531960000	310560000	483060000	392960000	452660000	341950000	694490000		Quantified
P47934	Carnitine O-acetyltransferase	Crat	FUNCTION: Catalyzes the reversible transfer of acyl groups from carnitine to coenzyme A (CoA) and regulates the acyl-CoA/CoA ratio. Also plays a crucial role in the transport of fatty acids for beta-oxidation. Responsible for the synthesis of short- and branched-chain acylcarnitines. Active towards some branched-chain amino acid oxidation pathway (BCAAO) intermediates. Trans-2-enoyl-CoAs and 2-me…	sp|P47934|CACP_MOUSE	sp|P47934|CACP_MOUSE Carnitine O-acetyltransferase OS=Mus musculus OX=10090 GN=Crat PE=1 SV=3	1	24	24	24	45.2	70.839	7187200000	7326100000	7668200000	8021900000	8318900000	7934200000	7435200000	7583600000	9166300000	7344600000	8010500000	8187900000		Quantified
P47955	60S acidic ribosomal protein P1	Rplp1	FUNCTION: Plays an important role in the elongation step of protein synthesis.	sp|P47955|RLA1_MOUSE	sp|P47955|RLA1_MOUSE 60S acidic ribosomal protein P1 OS=Mus musculus OX=10090 GN=Rplp1 PE=1 SV=1	1	1	1	1	14	11.475	252360000	143070000	229580000	231480000	212490000	256990000	243240000	241930000	156510000	200320000	250980000	251130000		Quantified
P47962	60S ribosomal protein L5	Rpl5	FUNCTION: Component of the ribosome, a large ribonucleoprotein complex responsible for the synthesis of proteins in the cell. The small ribosomal subunit (SSU) binds messenger RNAs (mRNAs) and translates the encoded message by selecting cognate aminoacyl-transfer RNA (tRNA) molecules. The large subunit (LSU) contains the ribosomal catalytic site termed the peptidyl transferase center (PTC), which…	sp|P47962|RL5_MOUSE	sp|P47962|RL5_MOUSE 60S ribosomal protein L5 OS=Mus musculus OX=10090 GN=Rpl5 PE=1 SV=3	1	11	11	11	33.7	34.4	1540800000	1571700000	1517000000	2160100000	1720200000	1660200000	2061100000	1271100000	1404200000	1215600000	1479400000	2040500000		Quantified
P47963	60S ribosomal protein L13	Rpl13		sp|P47963|RL13_MOUSE	sp|P47963|RL13_MOUSE 60S ribosomal protein L13 OS=Mus musculus OX=10090 GN=Rpl13 PE=1 SV=3	1	8	8	8	38.4	24.305	1156900000	1143300000	952080000	1661900000	1257700000	1370600000	1242700000	1069900000	1327100000	902090000	1163100000	1366100000		Quantified
P47964	60S ribosomal protein L36	Rpl36	FUNCTION: Component of the large ribosomal subunit. {ECO:0000250|UniProtKB:Q9Y3U8}.	sp|P47964|RL36_MOUSE	sp|P47964|RL36_MOUSE 60S ribosomal protein L36 OS=Mus musculus OX=10090 GN=Rpl36 PE=1 SV=2	1	2	2	2	18.1	12.215	244290000	266550000	159790000	295450000	213850000	155160000	285960000	135300000	207510000	135260000	109320000	270890000		Quantified
Q9CXU9	Eukaryotic translation initiation factor 1b	Eif1b	FUNCTION: Probably involved in translation.	sp|Q9CXU9|EIF1B_MOUSE;sp|P48024|EIF1_MOUSE	sp|Q9CXU9|EIF1B_MOUSE Eukaryotic translation initiation factor 1b OS=Mus musculus OX=10090 GN=Eif1b PE=1 SV=2;sp|P48024|EIF1_MOUSE Eukaryotic translation initiation factor 1 OS=Mus musculus OX=10090 GN=Eif1 PE=1 SV=2	2	1	1	1	14.2	12.823			14797000							16731000				Identified
P48036	Annexin A5	Anxa5	FUNCTION: This protein is an anticoagulant protein that acts as an indirect inhibitor of the thromboplastin-specific complex, which is involved in the blood coagulation cascade.	sp|P48036|ANXA5_MOUSE	sp|P48036|ANXA5_MOUSE Annexin A5 OS=Mus musculus OX=10090 GN=Anxa5 PE=1 SV=1	1	6	6	6	21	35.752	35176000	11484000	11940000	172390000	41738000	45608000	18477000	13972000	67584000	41181000	12653000	52441000		Quantified
P48193	Protein 4.1	Epb41	FUNCTION: Protein 4.1 is a major structural element of the erythrocyte membrane skeleton. It plays a key role in regulating membrane physical properties of mechanical stability and deformability by stabilizing spectrin-actin interaction. Recruits DLG1 to membranes. Required for dynein-dynactin complex and NUMA1 recruitment at the mitotic cell cortex during anaphase. {ECO:0000250|UniProtKB:P11171}.	sp|P48193|EPB41_MOUSE	sp|P48193|EPB41_MOUSE Protein 4.1 OS=Mus musculus OX=10090 GN=Epb41 PE=1 SV=2	1	12	12	10	18.2	95.91	146550000	196020000	93955000	170080000	163640000	144430000	126960000	136490000	156960000	86528000	106480000	201440000		Quantified
P48410	ATP-binding cassette sub-family D member 1	Abcd1	FUNCTION: Plays a role in the transport of free very-long-chain fatty acids (VLCFAs) as well as their CoA-esters across the peroxisomal membrane by acting as an ATP-specific binding subunit releasing ADP after ATP hydrolysis (By similarity). Thus, plays a role in regulation of VLCFAs and energy metabolism namely, in the degradation and biosynthesis of fatty acids by beta-oxidation, mitochondrial …	sp|P48410|ABCD1_MOUSE	sp|P48410|ABCD1_MOUSE ATP-binding cassette sub-family D member 1 OS=Mus musculus OX=10090 GN=Abcd1 PE=1 SV=1	1	5	5	5	9.5	81.858	66731000		50668000	70109000							53340000			Quantified
P48678	Prelamin-A/C	Lmna	FUNCTION: Lamins are components of the nuclear lamina, a fibrous layer on the nucleoplasmic side of the inner nuclear membrane, which is thought to provide a framework for the nuclear envelope and may also interact with chromatin. Lamin A and C are present in equal amounts in the lamina of mammals. Plays an important role in nuclear assembly, chromatin organization, nuclear membrane and telomere …	sp|P48678|LMNA_MOUSE	sp|P48678|LMNA_MOUSE Prelamin-A/C OS=Mus musculus OX=10090 GN=Lmna PE=1 SV=2	1	39	39	38	64.1	74.237	5306300000	5365600000	4691600000	5817400000	5127400000	5588900000	5048100000	6043300000	3877000000	3249100000	4362300000	4637600000		Quantified
P48758	Carbonyl reductase [NADPH] 1	Cbr1	FUNCTION: NADPH-dependent reductase with broad substrate specificity. Catalyzes the reduction of a wide variety of carbonyl compounds including quinones, prostaglandins, menadione, plus various xenobiotics. Catalyzes the reduction of the antitumor anthracyclines doxorubicin and daunorubicin to the cardiotoxic compounds doxorubicinol and daunorubicinol. Can convert prostaglandin E2 to prostaglandi…	sp|P48758|CBR1_MOUSE;sp|Q8K354|CBR3_MOUSE	sp|P48758|CBR1_MOUSE Carbonyl reductase [NADPH] 1 OS=Mus musculus OX=10090 GN=Cbr1 PE=1 SV=3	2	10	10	10	42.6	30.641	299350000	410990000	328390000	293480000	324410000	235790000	201170000	282140000	511090000	537630000	497510000	300520000		Quantified
P48771	Cytochrome c oxidase subunit 7A2, mitochondrial	Cox7a2	FUNCTION: Component of the cytochrome c oxidase, the last enzyme in the mitochondrial electron transport chain which drives oxidative phosphorylation. The respiratory chain contains 3 multisubunit complexes succinate dehydrogenase (complex II, CII), ubiquinol-cytochrome c oxidoreductase (cytochrome b-c1 complex, complex III, CIII) and cytochrome c oxidase (complex IV, CIV), that cooperate to tran…	sp|P48771|CX7A2_MOUSE	sp|P48771|CX7A2_MOUSE Cytochrome c oxidase subunit 7A2, mitochondrial OS=Mus musculus OX=10090 GN=Cox7a2 PE=1 SV=2	1	2	2	2	27.7	9.2908	287160000	715710000	1081200000	615070000	537580000	559400000	465960000	771970000	641640000	609640000	563250000	520370000		Quantified
P48787	Troponin I, cardiac muscle	Tnni3	FUNCTION: Troponin I is the inhibitory subunit of troponin, the thin filament regulatory complex which confers calcium-sensitivity to striated muscle actomyosin ATPase activity.	sp|P48787|TNNI3_MOUSE	sp|P48787|TNNI3_MOUSE Troponin I, cardiac muscle OS=Mus musculus OX=10090 GN=Tnni3 PE=1 SV=2	1	9	9	9	49.8	24.258	9135600000	9303700000	9419900000	9419500000	6229400000	7969800000	9261800000	10158000000	10807000000	10911000000	9829000000	8375900000		Quantified
P48962	ADP/ATP translocase 1	Slc25a4	FUNCTION: Involved in mitochondrial ADP/ATP transport. Catalyzes the exchange of cytoplasmic ADP with mitochondrial ATP across the mitochondrial inner membrane. {ECO:0000250|UniProtKB:P12235}.	sp|P48962|ADT1_MOUSE	sp|P48962|ADT1_MOUSE ADP/ATP translocase 1 OS=Mus musculus OX=10090 GN=Slc25a4 PE=1 SV=4	1	26	26	14	71.1	32.904	354860000000	320970000000	349950000000	375440000000	370180000000	365050000000	294060000000	337910000000	377790000000	299620000000	355140000000	415820000000		Quantified
P48999	Polyunsaturated fatty acid 5-lipoxygenase	Alox5	FUNCTION: Catalyzes the oxygenation of arachidonic acid to 5-hydroperoxyicosatetraenoic acid (5-HPETE) followed by the dehydration of the hydroperoxide into an epoxide, 5,6- oxidoicosatetraenoic acid (LTA4), thereby participates in the first step in leukotriene biosynthesis and in the inflammatory processes (PubMed:7629107, PubMed:7809134, PubMed:7969451, PubMed:23246375, PubMed:31642348). Also c…	sp|P48999|LOX5_MOUSE	sp|P48999|LOX5_MOUSE Polyunsaturated fatty acid 5-lipoxygenase OS=Mus musculus OX=10090 GN=Alox5 PE=1 SV=3	1	1	1	1	1.3	77.966	13581000				16431000			21192000	10565000			15458000		Identified
P49222	Protein 4.2	Epb42	FUNCTION: Probably plays an important role in the regulation of erythrocyte shape and mechanical properties.	sp|P49222|EPB42_MOUSE	sp|P49222|EPB42_MOUSE Protein 4.2 OS=Mus musculus OX=10090 GN=Epb42 PE=1 SV=3	1	5	5	5	9.8	76.755		103170000	27114000	21384000	49411000	27654000	16971000	20225000	64643000		61783000	85590000		Quantified
P49312	Heterogeneous nuclear ribonucleoprotein A1	Hnrnpa1	FUNCTION: Involved in the packaging of pre-mRNA into hnRNP particles, transport of poly(A) mRNA from the nucleus to the cytoplasm and may modulate splice site selection. May bind to specific miRNA hairpins. Binds to the IRES and thereby inhibits the translation of the apoptosis protease activating factor APAF1. {ECO:0000250|UniProtKB:P09651}.	sp|P49312|ROA1_MOUSE	sp|P49312|ROA1_MOUSE Heterogeneous nuclear ribonucleoprotein A1 OS=Mus musculus OX=10090 GN=Hnrnpa1 PE=1 SV=2	1	5	4	4	21.9	34.196	36569000	38123000	39746000	43286000	54679000	65734000		44147000	75257000	34505000	47730000	48732000		Quantified
P49615	Cyclin-dependent-like kinase 5	Cdk5	FUNCTION: Proline-directed serine/threonine-protein kinase essential for neuronal cell cycle arrest and differentiation and may be involved in apoptotic cell death in neuronal diseases by triggering abortive cell cycle re-entry. Interacts with D1 and D3-type G1 cyclins. Phosphorylates SRC, NOS3, VIM/vimentin, p35/CDK5R1, MEF2A, SIPA1L1, SH3GLB1, PXN, PAK1, MCAM/MUC18, SEPT5, SYN1, DNM1, AMPH, SYN…	sp|P49615|CDK5_MOUSE	sp|P49615|CDK5_MOUSE Cyclin-dependent-like kinase 5 OS=Mus musculus OX=10090 GN=Cdk5 PE=1 SV=1	1	9	9	8	33.9	33.288	83166000	95071000	90243000	91362000	97418000	91545000	78300000	96908000	84964000	109810000	108870000	144680000		Quantified
P49813	Tropomodulin-1	Tmod1	FUNCTION: Blocks the elongation and depolymerization of the actin filaments at the pointed end. The Tmod/TM complex contributes to the formation of the short actin protofilament, which in turn defines the geometry of the membrane skeleton (By similarity). {ECO:0000250}.	sp|P49813|TMOD1_MOUSE	sp|P49813|TMOD1_MOUSE Tropomodulin-1 OS=Mus musculus OX=10090 GN=Tmod1 PE=1 SV=2	1	24	24	22	65.2	40.466	11842000000	14163000000	12715000000	8197300000	12110000000	12307000000	15319000000	12791000000	15818000000	14838000000	14130000000	15016000000		Quantified
P49817	Caveolin-1	Cav1	FUNCTION: May act as a scaffolding protein within caveolar membranes (By similarity). Forms a stable heterooligomeric complex with CAV2 that targets to lipid rafts and drives caveolae formation. Mediates the recruitment of CAVIN proteins (CAVIN1/2/3/4) to the caveolae (PubMed:19546242). Interacts directly with G-protein alpha subunits and can functionally regulate their activity (By similarity). …	sp|P49817|CAV1_MOUSE	sp|P49817|CAV1_MOUSE Caveolin-1 OS=Mus musculus OX=10090 GN=Cav1 PE=1 SV=1	1	11	11	9	68	20.538	5148900000	3290400000	1449600000	3832200000	1720500000	2049800000	1686000000	6352600000	3267100000	2450300000	3778400000	6338900000		Quantified
P49962	Signal recognition particle 9 kDa protein	Srp9	FUNCTION: Signal-recognition-particle assembly has a crucial role in targeting secretory proteins to the rough endoplasmic reticulum membrane. SRP9 together with SRP14 and the Alu portion of the SRP RNA, constitutes the elongation arrest domain of SRP. The complex of SRP9 and SRP14 is required for SRP RNA binding.	sp|P49962|SRP09_MOUSE	sp|P49962|SRP09_MOUSE Signal recognition particle 9 kDa protein OS=Mus musculus OX=10090 GN=Srp9 PE=1 SV=2	1	1	1	1	12.8	10.194											11421000	25462000		Identified
P50136	2-oxoisovalerate dehydrogenase subunit alpha, mitochondrial	Bckdha	FUNCTION: The branched-chain alpha-keto dehydrogenase complex catalyzes the overall conversion of alpha-keto acids to acyl-CoA and CO(2). It contains multiple copies of three enzymatic components: branched-chain alpha-keto acid decarboxylase (E1), lipoamide acyltransferase (E2) and lipoamide dehydrogenase (E3).	sp|P50136|ODBA_MOUSE	sp|P50136|ODBA_MOUSE 2-oxoisovalerate dehydrogenase subunit alpha, mitochondrial OS=Mus musculus OX=10090 GN=Bckdha PE=1 SV=1	1	15	15	15	47.7	50.37	1157900000	1113200000	1197800000	1316300000	1359700000	1179300000	962310000	1355100000	1244200000	1180300000	1338200000	1608300000		Quantified
P50171	Estradiol 17-beta-dehydrogenase 8	Hsd17b8	FUNCTION: NAD-dependent 17-beta-hydroxysteroid dehydrogenase with highest activity towards estradiol. Has very low activity towards testosterone (PubMed:9712896). The heterotetramer with CBR4 has NADH-dependent 3-ketoacyl-acyl carrier protein reductase activity, and thereby plays a role in mitochondrial fatty acid biosynthesis. Within the heterotetramer, HSD17B8 binds NADH; CBR4 binds NADPD. {ECO…	sp|P50171|DHB8_MOUSE	sp|P50171|DHB8_MOUSE Estradiol 17-beta-dehydrogenase 8 OS=Mus musculus OX=10090 GN=Hsd17b8 PE=1 SV=2	1	11	11	11	61.4	26.588	946460000	1050600000	997120000	845120000	1027000000	1016700000	795350000	819730000	1252200000	1119800000	1009000000	1333800000		Quantified
P50247	Adenosylhomocysteinase	Ahcy	FUNCTION: Adenosylhomocysteine is a competitive inhibitor of S-adenosyl-L-methionine-dependent methyl transferase reactions; therefore adenosylhomocysteinase may play a key role in the control of methylations via regulation of the intracellular concentration of adenosylhomocysteine.	sp|P50247|SAHH_MOUSE	sp|P50247|SAHH_MOUSE Adenosylhomocysteinase OS=Mus musculus OX=10090 GN=Ahcy PE=1 SV=3	1	2	2	2	5.6	47.688											16567000			Identified
P50396	Rab GDP dissociation inhibitor alpha	Gdi1	FUNCTION: Regulates the GDP/GTP exchange reaction of most Rab proteins by inhibiting the dissociation of GDP from them, and the subsequent binding of GTP to them. Promotes the dissociation of GDP-bound Rab proteins from the membrane and inhibits their activation. Promotes the dissociation of RAB1A, RAB3A, RAB5A and RAB10 from membranes.	sp|P50396|GDIA_MOUSE	sp|P50396|GDIA_MOUSE Rab GDP dissociation inhibitor alpha OS=Mus musculus OX=10090 GN=Gdi1 PE=1 SV=3	1	5	2	2	16.6	50.521												14146000		Identified
P50462	Cysteine and glycine-rich protein 3	Csrp3	FUNCTION: Positive regulator of myogenesis. Acts as cofactor for myogenic bHLH transcription factors such as MYOD1, and probably MYOG and MYF6. Enhances the DNA-binding activity of the MYOD1:TCF3 isoform E47 complex and may promote formation of a functional MYOD1:TCF3 isoform E47:MEF2A complex involved in myogenesis (By similarity). Plays a crucial and specific role in the organization of cytosol…	sp|P50462|CSRP3_MOUSE	sp|P50462|CSRP3_MOUSE Cysteine and glycine-rich protein 3 OS=Mus musculus OX=10090 GN=Csrp3 PE=1 SV=1	1	8	8	8	52.6	20.895	6882600000	7164800000	7421300000	5413500000	7172300000	6062200000	5653100000	7252800000	9626500000	7563100000	8419800000	7396700000		Quantified
P50516	V-type proton ATPase catalytic subunit A	Atp6v1a	FUNCTION: Catalytic subunit of the peripheral V1 complex of vacuolar ATPase. V-ATPase vacuolar ATPase is responsible for acidifying a variety of intracellular compartments in eukaryotic cells. In aerobic conditions, involved in intracellular iron homeostasis, thus triggering the activity of Fe(2+) prolyl hydroxylase (PHD) enzymes, and leading to HIF1A hydroxylation and subsequent proteasomal degr…	sp|P50516|VATA_MOUSE	sp|P50516|VATA_MOUSE V-type proton ATPase catalytic subunit A OS=Mus musculus OX=10090 GN=Atp6v1a PE=1 SV=2	1	7	7	7	16	68.325	54981000	58115000	59607000	66186000	57203000	49207000	58946000	74415000	68401000	65921000	100920000	66974000		Quantified
P50544	Very long-chain specific acyl-CoA dehydrogenase, mitochondrial	Acadvl	FUNCTION: Active toward esters of long-chain and very long chain fatty acids such as palmitoyl-CoA, myristoyl-CoA and stearoyl-CoA. Can accommodate substrate acyl chain lengths as long as 24 carbons, but shows little activity for substrates of less than 12 carbons (By similarity). {ECO:0000250}.	sp|P50544|ACADV_MOUSE	sp|P50544|ACADV_MOUSE Very long-chain specific acyl-CoA dehydrogenase, mitochondrial OS=Mus musculus OX=10090 GN=Acadvl PE=1 SV=3	1	39	39	39	74.8	70.875	61460000000	58888000000	62227000000	63750000000	60949000000	64185000000	58829000000	65081000000	65734000000	61287000000	64102000000	70053000000		Quantified
P50608	Fibromodulin	Fmod	FUNCTION: Affects the rate of fibrils formation. May have a primary role in collagen fibrillogenesis.	sp|P50608|FMOD_MOUSE	sp|P50608|FMOD_MOUSE Fibromodulin OS=Mus musculus OX=10090 GN=Fmod PE=2 SV=1	1	1	1	1	4.5	43.054														Identified
P50752	Troponin T, cardiac muscle	Tnnt2	FUNCTION: Troponin T is the tropomyosin-binding subunit of troponin, the thin filament regulatory complex which confers calcium-sensitivity to striated muscle actomyosin ATPase activity.	sp|P50752|TNNT2_MOUSE;sp|O88346|TNNT1_MOUSE	sp|P50752|TNNT2_MOUSE Troponin T, cardiac muscle OS=Mus musculus OX=10090 GN=Tnnt2 PE=1 SV=2	2	17	17	17	41.9	35.825	38216000000	46155000000	48069000000	36335000000	38067000000	38816000000	56491000000	49588000000	57339000000	61288000000	68453000000	47079000000		Quantified
P51150	Ras-related protein Rab-7a	Rab7a	FUNCTION: Key regulator in endo-lysosomal trafficking. Governs early-to-late endosomal maturation, microtubule minus-end as well as plus-end directed endosomal migration and positioning, and endosome-lysosome transport through different protein-protein interaction cascades. Plays a central role, not only in endosomal traffic, but also in many other cellular and physiological events, such as growt…	sp|P51150|RAB7A_MOUSE	sp|P51150|RAB7A_MOUSE Ras-related protein Rab-7a OS=Mus musculus OX=10090 GN=Rab7a PE=1 SV=2	1	14	14	14	76.3	23.489	2756400000	2561300000	2412500000	2730000000	2884300000	3859900000	3045300000	3128900000	2656000000	2579900000	2539400000	3348100000		Quantified
P51174	Long-chain specific acyl-CoA dehydrogenase, mitochondrial	Acadl	FUNCTION: Long-chain specific acyl-CoA dehydrogenase is one of the acyl-CoA dehydrogenases that catalyze the first step of mitochondrial fatty acid beta-oxidation, an aerobic process breaking down fatty acids into acetyl-CoA and allowing the production of energy from fats. The first step of fatty acid beta-oxidation consists in the removal of one hydrogen from C-2 and C-3 of the straight-chain fa…	sp|P51174|ACADL_MOUSE	sp|P51174|ACADL_MOUSE Long-chain specific acyl-CoA dehydrogenase, mitochondrial OS=Mus musculus OX=10090 GN=Acadl PE=1 SV=2	1	18	18	18	47.7	47.907	8639000000	8233100000	9004800000	12119000000	9991900000	12794000000	9397300000	9245000000	9761200000	10630000000	12529000000	8883200000		Quantified
P51175	Protoporphyrinogen oxidase	Ppox	FUNCTION: Catalyzes the 6-electron oxidation of protoporphyrinogen-IX to form protoporphyrin-IX. {ECO:0000269|PubMed:8554330}.	sp|P51175|PPOX_MOUSE	sp|P51175|PPOX_MOUSE Protoporphyrinogen oxidase OS=Mus musculus OX=10090 GN=Ppox PE=1 SV=1	1	6	6	6	19.7	50.87	36055000	34645000	39674000	23467000	36374000	50675000	31541000	47247000	47549000	47328000	29439000	58045000		Quantified
P51410	60S ribosomal protein L9	Rpl9		sp|P51410|RL9_MOUSE	sp|P51410|RL9_MOUSE 60S ribosomal protein L9 OS=Mus musculus OX=10090 GN=Rpl9 PE=2 SV=2	1	9	9	9	60.9	21.881	1645200000	1315100000	1884300000	1950600000	1629600000	1675400000	1511100000	1596900000	1473400000	1501900000	1731600000	1749700000		Quantified
P51637	Caveolin-3	Cav3	FUNCTION: May act as a scaffolding protein within caveolar membranes. Interacts directly with G-protein alpha subunits and can functionally regulate their activity. May also regulate voltage-gated potassium channels. Plays a role in the sarcolemma repair mechanism of both skeletal muscle and cardiomyocytes that permits rapid resealing of membranes disrupted by mechanical stress (PubMed:19380584).…	sp|P51637|CAV3_MOUSE	sp|P51637|CAV3_MOUSE Caveolin-3 OS=Mus musculus OX=10090 GN=Cav3 PE=1 SV=1	1	4	2	2	19.9	17.358	230290000	159800000	185730000	204300000	176990000	156250000	221330000	234020000	153380000	98216000	180980000	108130000		Quantified
P51660	Peroxisomal multifunctional enzyme type 2	Hsd17b4	FUNCTION: Bifunctional enzyme acting on the peroxisomal beta-oxidation pathway for fatty acids (PubMed:17442273). Catalyzes the formation of 3-ketoacyl-CoA intermediates from straight-chain, 2-methyl-branched-chain fatty acids bile acid intermediates. With EHHADH, catalyzes the hydration of trans-2-enoyl-CoA and the dehydrogenation of 3-hydroxyacyl-CoA, but with opposite chiral specificity (By si…	sp|P51660|DHB4_MOUSE	sp|P51660|DHB4_MOUSE Peroxisomal multifunctional enzyme type 2 OS=Mus musculus OX=10090 GN=Hsd17b4 PE=1 SV=3	1	19	19	19	31.7	79.481	562450000	683010000	643720000	654230000	758990000	745890000	581990000	619250000	684210000	570830000	642290000	592050000		Quantified
P51667	Myosin regulatory light chain 2, ventricular/cardiac muscle isoform	Myl2	FUNCTION: Contractile protein that plays a role in heart development and function (PubMed:10409661). Following phosphorylation, plays a role in cross-bridge cycling kinetics and cardiac muscle contraction by increasing myosin lever arm stiffness and promoting myosin head diffusion; as a consequence of the increase in maximum contraction force and calcium sensitivity of contraction force. These ev…	sp|P51667|MLRV_MOUSE;sp|Q62082|MYL10_MOUSE	sp|P51667|MLRV_MOUSE Myosin regulatory light chain 2, ventricular/cardiac muscle isoform OS=Mus musculus OX=10090 GN=Myl2 PE=1 SV=3	2	17	17	17	89.8	18.864	24715000000	23897000000	26167000000	18310000000	24378000000	19790000000	18563000000	23029000000	39133000000	35850000000	29612000000	26092000000		Quantified
P51807	Dynein light chain Tctex-type 1	Dynlt1	FUNCTION: Acts as one of several non-catalytic accessory components of the cytoplasmic dynein 1 complex that are thought to be involved in linking dynein to cargos and to adapter proteins that regulate dynein function. Cytoplasmic dynein 1 acts as a motor for the intracellular retrograde motility of vesicles and organelles along microtubules. Binds to transport cargos and is involved in apical ca…	sp|P51807|DYLT1_MOUSE	sp|P51807|DYLT1_MOUSE Dynein light chain Tctex-type 1 OS=Mus musculus OX=10090 GN=Dynlt1 PE=1 SV=1	1	2	2	2	37.2	12.483		44740000	46723000	54017000					50350000	55582000		50912000		Quantified
P51881	ADP/ATP translocase 2	Slc25a5	FUNCTION: Catalyzes the exchange of cytoplasmic ADP with mitochondrial ATP across the mitochondrial inner membrane. As part of the mitotic spindle-associated MMXD complex it may play a role in chromosome segregation (By similarity). {ECO:0000250}.	sp|P51881|ADT2_MOUSE	sp|P51881|ADT2_MOUSE ADP/ATP translocase 2 OS=Mus musculus OX=10090 GN=Slc25a5 PE=1 SV=3	1	23	11	11	65.4	32.931	34882000000	29158000000	30865000000	37719000000	34589000000	38709000000	31661000000	36647000000	34446000000	29555000000	33654000000	40758000000		Quantified
P51885	Lumican	Lum		sp|P51885|LUM_MOUSE;CON__Q05443	sp|P51885|LUM_MOUSE Lumican OS=Mus musculus OX=10090 GN=Lum PE=1 SV=2	2	3	3	3	14.8	38.265					30237000			37789000						Identified
P52196	Thiosulfate sulfurtransferase	Tst	FUNCTION: Together with MRPL18, acts as a mitochondrial import factor for the cytosolic 5S rRNA. Only the nascent unfolded cytoplasmic form is able to bind to the 5S rRNA (By similarity). Formation of iron-sulfur complexes and cyanide detoxification. {ECO:0000250}.	sp|P52196|THTR_MOUSE	sp|P52196|THTR_MOUSE Thiosulfate sulfurtransferase OS=Mus musculus OX=10090 GN=Tst PE=1 SV=3	1	4	4	4	19.2	33.466	39000000	39403000	41492000	27766000	53653000	44715000	50489000	36995000	61760000	28841000	31110000	52318000		Quantified
P52430	Serum paraoxonase/arylesterase 1	Pon1	FUNCTION: Hydrolyzes the toxic metabolites of a variety of organophosphorus insecticides. Capable of hydrolyzing a broad spectrum of organophosphate substrates and lactones, and a number of aromatic carboxylic acid esters. Mediates an enzymatic protection of low density lipoproteins against oxidative modification. {ECO:0000250|UniProtKB:P27169}.	sp|P52430|PON1_MOUSE	sp|P52430|PON1_MOUSE Serum paraoxonase/arylesterase 1 OS=Mus musculus OX=10090 GN=Pon1 PE=1 SV=2	1	1	1	1	3.1	39.565				9962800								10950000		Identified
P52479	Ubiquitin carboxyl-terminal hydrolase 10	Usp10	FUNCTION: Hydrolase that can remove conjugated ubiquitin from target proteins such as p53/TP53, BECN1, SNX3 and CFTR. Acts as an essential regulator of p53/TP53 stability: in unstressed cells, specifically deubiquitinates p53/TP53 in the cytoplasm, leading to counteract MDM2 action and stabilize p53/TP53. Following DNA damage, translocates to the nucleus and deubiquitinates p53/TP53, leading to r…	sp|P52479|UBP10_MOUSE	sp|P52479|UBP10_MOUSE Ubiquitin carboxyl-terminal hydrolase 10 OS=Mus musculus OX=10090 GN=Usp10 PE=1 SV=3	1	2	2	2	2.8	87.021						9234400				14174000				Identified
P52480	Pyruvate kinase PKM	Pkm	FUNCTION: Glycolytic enzyme that catalyzes the transfer of a phosphoryl group from phosphoenolpyruvate (PEP) to ADP, generating ATP (By similarity). Stimulates POU5F1-mediated transcriptional activation (By similarity). Promotes in a STAT1-dependent manner, the expression of the immune checkpoint protein CD274 in ARNTL/BMAL1-deficient macrophages (PubMed:29996098). {ECO:0000250|UniProtKB:P14618, …	sp|P52480|KPYM_MOUSE;sp|P53657|KPYR_MOUSE	sp|P52480|KPYM_MOUSE Pyruvate kinase PKM OS=Mus musculus OX=10090 GN=Pkm PE=1 SV=4	2	30	30	30	58.9	57.844	1665400000	1729700000	1582500000	1663200000	1422600000	1742300000	1356500000	1455400000	2397300000	2188800000	1821000000	1847000000		Quantified
P52503	NADH dehydrogenase [ubiquinone] iron-sulfur protein 6, mitochondrial	Ndufs6	FUNCTION: Accessory subunit of the mitochondrial membrane respiratory chain NADH dehydrogenase (Complex I), that is believed not to be involved in catalysis. Complex I functions in the transfer of electrons from NADH to the respiratory chain. The immediate electron acceptor for the enzyme is believed to be ubiquinone. {ECO:0000250|UniProtKB:O75380}.	sp|P52503|NDUS6_MOUSE	sp|P52503|NDUS6_MOUSE NADH dehydrogenase [ubiquinone] iron-sulfur protein 6, mitochondrial OS=Mus musculus OX=10090 GN=Ndufs6 PE=1 SV=2	1	5	5	5	53.4	13.02	1778200000	1502600000	1113100000	3046700000	1671100000	2166400000	2376800000	2182200000	1485400000	1373700000	1624400000	1888000000		Quantified
P52825	Carnitine O-palmitoyltransferase 2, mitochondrial	Cpt2		sp|P52825|CPT2_MOUSE	sp|P52825|CPT2_MOUSE Carnitine O-palmitoyltransferase 2, mitochondrial OS=Mus musculus OX=10090 GN=Cpt2 PE=1 SV=2	1	8	8	8	17.2	73.98	28271000	31614000	53745000	45311000	48134000	57150000	41087000	44331000	54444000	76133000	48331000	183870000		Quantified
P52840	Sulfotransferase 1A1	Sult1a1	FUNCTION: Sulfotransferase that utilizes 3'-phospho-5'-adenylyl sulfate (PAPS) as sulfonate donor to catalyze the sulfate conjugation of catecholamines, phenolic drugs and neurotransmitters. Has also estrogen sulfotransferase activity. responsible for the sulfonation and activation of minoxidil. Is Mediates the metabolic activation of carcinogenic N-hydroxyarylamines to DNA binding products and c…	sp|P52840|ST1A1_MOUSE	sp|P52840|ST1A1_MOUSE Sulfotransferase 1A1 OS=Mus musculus OX=10090 GN=Sult1a1 PE=1 SV=1	1	4	4	4	19.6	33.974		12964000	11649000		12021000					9458000				Identified
P53026	60S ribosomal protein L10a	Rpl10a	FUNCTION: Component of the large ribosomal subunit. {ECO:0000250|UniProtKB:P62906}.	sp|P53026|RL10A_MOUSE	sp|P53026|RL10A_MOUSE 60S ribosomal protein L10a OS=Mus musculus OX=10090 GN=Rpl10a PE=1 SV=3	1	6	6	6	25.8	24.916	193820000	231080000	229490000	152800000	266970000	185930000	341960000	278340000	311920000	260580000	265570000	219910000		Quantified
P53395	Lipoamide acyltransferase component of branched-chain alpha-keto acid dehydrogenase complex, mitochondrial	Dbt	FUNCTION: The branched-chain alpha-keto dehydrogenase complex catalyzes the overall conversion of alpha-keto acids to acyl-CoA and CO(2). It contains multiple copies of three enzymatic components: branched-chain alpha-keto acid decarboxylase (E1), lipoamide acyltransferase (E2) and lipoamide dehydrogenase (E3). Within this complex, the catalytic function of this enzyme is to accept, and to transf…	sp|P53395|ODB2_MOUSE	sp|P53395|ODB2_MOUSE Lipoamide acyltransferase component of branched-chain alpha-keto acid dehydrogenase complex, mitochondrial OS=Mus musculus OX=10090 GN=Dbt PE=1 SV=2	1	19	19	19	46.3	53.246	764420000	1189200000	701390000	1326400000	1040600000	972570000	934890000	1691400000	1121300000	1573100000	1233400000	2924800000		Quantified
P53690	Matrix metalloproteinase-14	Mmp14	FUNCTION: Endopeptidase that degrades various components of the extracellular matrix such as collagen. Activates progelatinase A. Essential for pericellular collagenolysis and modeling of skeletal and extraskeletal connective tissues during development (PubMed:10520996). May be involved in actin cytoskeleton reorganization by cleaving PTK7 (By similarity). Acts as a positive regulator of cell gro…	sp|P53690|MMP14_MOUSE	sp|P53690|MMP14_MOUSE Matrix metalloproteinase-14 OS=Mus musculus OX=10090 GN=Mmp14 PE=2 SV=3	1	2	2	2	3.4	65.918	1197500000	1511600000	2171600000	1768500000	599700000	1850200000	1461300000	1065900000	2088300000	1963000000	975590000	2203400000		Quantified
P53702	Cytochrome c-type heme lyase	Hccs	FUNCTION: Links covalently the heme group to the apoprotein of cytochrome c. {ECO:0000250}.	sp|P53702|CCHL_MOUSE	sp|P53702|CCHL_MOUSE Cytochrome c-type heme lyase OS=Mus musculus OX=10090 GN=Hccs PE=1 SV=2	1	8	8	8	34.6	30.977	142960000	179020000	166130000	226990000	225980000	256690000	166840000	181070000	137900000	102750000	184780000	190350000		Quantified
P53986	Monocarboxylate transporter 1	Slc16a1	FUNCTION: Proton-coupled monocarboxylate transporter. Catalyzes the rapid transport across the plasma membrane of many monocarboxylates such as lactate, pyruvate, branched-chain oxo acids derived from leucine, valine and isoleucine, and the ketone bodies acetoacetate, beta-hydroxybutyrate and acetate. Depending on the tissue and on cicumstances, mediates the import or export of lactic acid and ke…	sp|P53986|MOT1_MOUSE	sp|P53986|MOT1_MOUSE Monocarboxylate transporter 1 OS=Mus musculus OX=10090 GN=Slc16a1 PE=1 SV=1	1	11	11	11	26	53.267	3211500000	3035900000	3535400000	4090100000	3319300000	2781200000	2233200000	3005000000	2870000000	2694900000	3066000000	3330400000		Quantified
P53994	Ras-related protein Rab-2A	Rab2a	FUNCTION: Required for protein transport from the endoplasmic reticulum to the Golgi complex. {ECO:0000250}.	sp|P53994|RAB2A_MOUSE;sp|P59279|RAB2B_MOUSE	sp|P53994|RAB2A_MOUSE Ras-related protein Rab-2A OS=Mus musculus OX=10090 GN=Rab2a PE=1 SV=1	2	14	14	14	74.5	23.547	2157100000	1742900000	2194900000	1890500000	2277600000	2236000000	1914500000	2239000000	1817900000	1775700000	1997200000	2326100000		Quantified
P53996	Cellular nucleic acid-binding protein	Cnbp	FUNCTION: Single-stranded DNA-binding protein, with specificity to the sterol regulatory element (SRE). Involved in sterol-mediated repression.	sp|P53996|CNBP_MOUSE	sp|P53996|CNBP_MOUSE Cellular nucleic acid-binding protein OS=Mus musculus OX=10090 GN=Cnbp PE=1 SV=2	1	4	4	4	24.7	19.592	121020000	208760000	208770000	164220000	126130000	160240000	109400000	144230000	158010000	144450000	120070000	160380000		Quantified
P54071	Isocitrate dehydrogenase [NADP], mitochondrial	Idh2	FUNCTION: Plays a role in intermediary metabolism and energy production. It may tightly associate or interact with the pyruvate dehydrogenase complex.	sp|P54071|IDHP_MOUSE	sp|P54071|IDHP_MOUSE Isocitrate dehydrogenase [NADP], mitochondrial OS=Mus musculus OX=10090 GN=Idh2 PE=1 SV=3	1	27	27	25	58.8	50.906	134570000000	125750000000	122400000000	126860000000	105110000000	115650000000	116110000000	109590000000	138590000000	133770000000	128750000000	147140000000		Quantified
P54116	Stomatin	Stom	FUNCTION: Regulates ion channel activity and transmembrane ion transport. Regulates ASIC2 and ASIC3 channel activity. {ECO:0000269|PubMed:15471860, ECO:0000269|PubMed:22850675}.	sp|P54116|STOM_MOUSE	sp|P54116|STOM_MOUSE Stomatin OS=Mus musculus OX=10090 GN=Stom PE=1 SV=3	1	12	12	12	58.1	31.375	578930000	528420000	523430000	420410000	398920000	355630000	301940000	340680000	878660000	674510000	677720000	727050000		Quantified
P54265	Myotonin-protein kinase	Dmpk	FUNCTION: Non-receptor serine/threonine protein kinase which is necessary for the maintenance of skeletal muscle structure and function. May play a role in myocyte differentiation and survival by regulating the integrity of the nuclear envelope and the expression of muscle-specific genes. May also phosphorylate PPP1R12A and inhibit the myosin phosphatase activity to regulate myosin phosphorylatio…	sp|P54265|DMPK_MOUSE	sp|P54265|DMPK_MOUSE Myotonin-protein kinase OS=Mus musculus OX=10090 GN=Dmpk PE=1 SV=1	1	2	2	2	4.8	69.601	24989000		23515000	27786000	18606000	20012000	17319000	20191000	33972000	23842000	25799000	20537000		Quantified
P54310	Hormone-sensitive lipase	Lipe	FUNCTION: In adipose tissue and heart, it primarily hydrolyzes stored triglycerides to free fatty acids, while in steroidogenic tissues, it principally converts cholesteryl esters to free cholesterol for steroid hormone production. {ECO:0000269|PubMed:23291629}.	sp|P54310|LIPS_MOUSE	sp|P54310|LIPS_MOUSE Hormone-sensitive lipase OS=Mus musculus OX=10090 GN=Lipe PE=1 SV=2	1	8	8	8	17.1	83.347	23190000	26887000	39045000	32793000	25087000	31795000	22038000	32362000	26211000	25559000	46399000	15609000		Quantified
P54775	26S proteasome regulatory subunit 6B	Psmc4	FUNCTION: Component of the 26S proteasome, a multiprotein complex involved in the ATP-dependent degradation of ubiquitinated proteins. This complex plays a key role in the maintenance of protein homeostasis by removing misfolded or damaged proteins, which could impair cellular functions, and by removing proteins whose functions are no longer required. Therefore, the proteasome participates in num…	sp|P54775|PRS6B_MOUSE	sp|P54775|PRS6B_MOUSE 26S proteasome regulatory subunit 6B OS=Mus musculus OX=10090 GN=Psmc4 PE=1 SV=2	1	13	13	13	37.6	47.408	371550000	262990000	405440000	339230000	259830000	195230000	179530000	333100000	327750000	442140000	518400000	183630000		Quantified
P54797	Transport and Golgi organization 2 homolog	Tango2		sp|P54797|TNG2_MOUSE	sp|P54797|TNG2_MOUSE Transport and Golgi organization 2 homolog OS=Mus musculus OX=10090 GN=Tango2 PE=1 SV=1	1	2	2	2	8	30.947		18434000							17316000	20729000	11788000			Quantified
P54822	Adenylosuccinate lyase	Adsl	FUNCTION: Catalyzes two non-sequential steps in de novo AMP synthesis: converts (S)-2-(5-amino-1-(5-phospho-D-ribosyl)imidazole-4-carboxamido)succinate (SAICAR) to fumarate plus 5-amino-1-(5-phospho-D-ribosyl)imidazole-4-carboxamide, and thereby also contributes to de novo IMP synthesis, and converts succinyladenosine monophosphate (SAMP) to AMP and fumarate. {ECO:0000250|UniProtKB:P30566}.	sp|P54822|PUR8_MOUSE	sp|P54822|PUR8_MOUSE Adenylosuccinate lyase OS=Mus musculus OX=10090 GN=Adsl PE=1 SV=2	1	15	15	15	43.6	54.866	437220000	463920000	520650000	543280000	460100000	510060000	293640000	461790000	529070000	711510000	595420000	454270000		Quantified
P54823	Probable ATP-dependent RNA helicase DDX6	Ddx6	FUNCTION: Essential for the formation of P-bodies, cytosolic membrane-less ribonucleoprotein granules involved in RNA metabolism through the coordinated storage of mRNAs encoding regulatory functions (By similarity). In the process of mRNA degradation, plays a role in mRNA decapping (By similarity). Blocks autophagy in nutrient-rich conditions by repressing the expression of ATG-related genes thr…	sp|P54823|DDX6_MOUSE	sp|P54823|DDX6_MOUSE Probable ATP-dependent RNA helicase DDX6 OS=Mus musculus OX=10090 GN=Ddx6 PE=1 SV=1	1	10	10	10	28.2	54.191	96481000	76197000	82321000	113320000	87702000	73804000	84509000	78035000	88917000	90065000	91814000	88130000		Quantified
P55096	ATP-binding cassette sub-family D member 3	Abcd3	FUNCTION: Probable transporter involved in the transport of branched-chain fatty acids and C27 bile acids into the peroxisome; the latter function is a crucial step in bile acid biosynthesis. The nucleotide-binding fold acts as an ATP-binding subunit with ATPase activity. {ECO:0000250|UniProtKB:P28288}.	sp|P55096|ABCD3_MOUSE	sp|P55096|ABCD3_MOUSE ATP-binding cassette sub-family D member 3 OS=Mus musculus OX=10090 GN=Abcd3 PE=1 SV=2	1	15	15	15	30.5	75.474	647340000	688100000	565670000	658800000	761510000	605190000	532790000	756130000	716450000	620820000	638650000	512890000		Quantified
P55258	Ras-related protein Rab-8A	Rab8a	FUNCTION: The small GTPases Rab are key regulators of intracellular membrane trafficking, from the formation of transport vesicles to their fusion with membranes. Rabs cycle between an inactive GDP-bound form and an active GTP-bound form that is able to recruit to membranes different sets of downstream effectors directly responsible for vesicle formation, movement, tethering and fusion. That Rab …	sp|P55258|RAB8A_MOUSE;sp|Q9DD03|RAB13_MOUSE	sp|P55258|RAB8A_MOUSE Ras-related protein Rab-8A OS=Mus musculus OX=10090 GN=Rab8a PE=1 SV=2	2	9	7	5	48.8	23.668	160800000	206990000	125660000	199010000	126950000	169520000	126160000	173960000	132300000	139100000	146990000	169710000		Quantified
P55264	Adenosine kinase	Adk	FUNCTION: ATP dependent phosphorylation of adenosine and other related nucleoside analogs to monophosphate derivatives. Serves as a potential regulator of concentrations of extracellular adenosine and intracellular adenine nucleotides.	sp|P55264|ADK_MOUSE	sp|P55264|ADK_MOUSE Adenosine kinase OS=Mus musculus OX=10090 GN=Adk PE=1 SV=2	1	2	2	2	5.3	40.148	28171000	32103000	35111000		28227000	26254000	20950000	19867000	28831000	31461000	31137000	41638000		Quantified
P55284	Cadherin-5	Cdh5	FUNCTION: Cadherins are calcium-dependent cell adhesion proteins (By similarity). They preferentially interact with themselves in a homophilic manner in connecting cells; cadherins may thus contribute to the sorting of heterogeneous cell types (By similarity). This cadherin may play an important role in endothelial cell biology through control of the cohesion and organization of the intercellular…	sp|P55284|CADH5_MOUSE	sp|P55284|CADH5_MOUSE Cadherin-5 OS=Mus musculus OX=10090 GN=Cdh5 PE=1 SV=2	1	3	3	3	5.6	87.902	27267000		31624000	30232000			25909000	48912000			31482000			Quantified
P55292	Desmocollin-2	Dsc2	FUNCTION: Component of intercellular desmosome junctions. Involved in the interaction of plaque proteins and intermediate filaments mediating cell-cell adhesion. May contribute to epidermal cell positioning (stratification) by mediating differential adhesiveness between cells that express different isoforms.	sp|P55292|DSC2_MOUSE	sp|P55292|DSC2_MOUSE Desmocollin-2 OS=Mus musculus OX=10090 GN=Dsc2 PE=1 SV=1	1	1	1	1	1.1	99.96					15560000		12517000		23266000			15610000		Identified
P55937	Golgin subfamily A member 3	Golga3	FUNCTION: Plays an important role in spermatogenesis and/or testis development. Probably identical with the serologically detectable male antigen (SDM). Probably involved in maintaining Golgi structure. {ECO:0000269|PubMed:11835574}.	sp|P55937|GOGA3_MOUSE	sp|P55937|GOGA3_MOUSE Golgin subfamily A member 3 OS=Mus musculus OX=10090 GN=Golga3 PE=1 SV=3	1	2	2	2	2.6	167.22											97852000			Identified
P56135	ATP synthase subunit f, mitochondrial	Atp5mf	FUNCTION: Mitochondrial membrane ATP synthase (F(1)F(0) ATP synthase or Complex V) produces ATP from ADP in the presence of a proton gradient across the membrane which is generated by electron transport complexes of the respiratory chain. F-type ATPases consist of two structural domains, F(1) - containing the extramembraneous catalytic core and F(0) - containing the membrane proton channel, linke…	sp|P56135|ATPK_MOUSE	sp|P56135|ATPK_MOUSE ATP synthase subunit f, mitochondrial OS=Mus musculus OX=10090 GN=Atp5mf PE=1 SV=3	1	3	3	3	34.1	10.344	6954000000	8813200000	7214600000	9455400000	7554300000	7374200000	8374800000	7068000000	9723500000	7830000000	6618900000	9121000000		Quantified
P56379	ATP synthase subunit ATP5MPL, mitochondrial	Atp5mpl	FUNCTION: Mitochondrial membrane ATP synthase (F(1)F(0) ATP synthase or Complex V) produces ATP from ADP in the presence of a proton gradient across the membrane which is generated by electron transport complexes of the respiratory chain. F-type ATPases consist of two structural domains, F(1) - containing the extramembraneous catalytic core and F(0) - containing the membrane proton channel, linke…	sp|P56379|ATP68_MOUSE	sp|P56379|ATP68_MOUSE ATP synthase subunit ATP5MPL, mitochondrial OS=Mus musculus OX=10090 GN=Atp5mpl PE=1 SV=1	1	2	2	2	13.8	6.6979	1938800000	2530600000	2603800000	3196200000	2281300000	2392800000	1878300000	2287300000	2900000000	2251400000	1735200000	2442400000		Quantified
P56380	Bis(5-nucleosyl)-tetraphosphatase [asymmetrical]	Nudt2	FUNCTION: Asymmetrically hydrolyzes Ap4A to yield AMP and ATP. Plays a major role in maintaining homeostasis (By similarity). {ECO:0000250}.	sp|P56380|AP4A_MOUSE	sp|P56380|AP4A_MOUSE Bis(5-nucleosyl)-tetraphosphatase [asymmetrical] OS=Mus musculus OX=10090 GN=Nudt2 PE=1 SV=3	1	5	5	5	51.7	16.989	98363000	155270000	177550000	163300000	167780000	171660000	115880000	207260000	193550000	213320000		114790000		Quantified
P56382	ATP synthase subunit epsilon, mitochondrial	Atp5f1e	FUNCTION: Mitochondrial membrane ATP synthase (F(1)F(0) ATP synthase or Complex V) produces ATP from ADP in the presence of a proton gradient across the membrane which is generated by electron transport complexes of the respiratory chain. F-type ATPases consist of two structural domains, F(1) - containing the extramembraneous catalytic core, and F(0) - containing the membrane proton channel, link…	sp|P56382|ATP5E_MOUSE	sp|P56382|ATP5E_MOUSE ATP synthase subunit epsilon, mitochondrial OS=Mus musculus OX=10090 GN=Atp5f1e PE=1 SV=2	1	2	2	2	28.8	5.8378	2697500000	2387500000	2143000000	3091200000	3003600000	2910300000	2804800000	2729800000	3777700000	2182200000	2035400000	3048900000		Quantified
P56391	Cytochrome c oxidase subunit 6B1	Cox6b1	FUNCTION: Component of the cytochrome c oxidase, the last enzyme in the mitochondrial electron transport chain which drives oxidative phosphorylation. The respiratory chain contains 3 multisubunit complexes succinate dehydrogenase (complex II, CII), ubiquinol-cytochrome c oxidoreductase (cytochrome b-c1 complex, complex III, CIII) and cytochrome c oxidase (complex IV, CIV), that cooperate to tran…	sp|P56391|CX6B1_MOUSE	sp|P56391|CX6B1_MOUSE Cytochrome c oxidase subunit 6B1 OS=Mus musculus OX=10090 GN=Cox6b1 PE=1 SV=2	1	5	5	5	61.6	10.071	880790000	1430200000	1764600000	1760300000	1062600000	1717900000	621310000	1265000000	1312500000	1765800000	1594000000	929850000		Quantified
P56392	Cytochrome c oxidase subunit 7A1, mitochondrial	Cox7a1	FUNCTION: Component of the cytochrome c oxidase, the last enzyme in the mitochondrial electron transport chain which drives oxidative phosphorylation. The respiratory chain contains 3 multisubunit complexes succinate dehydrogenase (complex II, CII), ubiquinol-cytochrome c oxidoreductase (cytochrome b-c1 complex, complex III, CIII) and cytochrome c oxidase (complex IV, CIV), that cooperate to tran…	sp|P56392|CX7A1_MOUSE	sp|P56392|CX7A1_MOUSE Cytochrome c oxidase subunit 7A1, mitochondrial OS=Mus musculus OX=10090 GN=Cox7a1 PE=1 SV=1	1	2	2	2	28.8	8.9863	3941900000	5015200000	3558100000	6601600000	4607100000	4030000000	4822900000	4154600000	4839700000	3231400000	2713600000	4501800000		Quantified
P56394	Cytochrome c oxidase copper chaperone	Cox17	FUNCTION: Copper metallochaperone essential for the assembly of the mitochondrial respiratory chain complex IV (CIV), also known as cytochrome c oxidase. Binds two copper ions and delivers them to the metallochaperone SCO1 which transports the copper ions to the Cu(A) site on the cytochrome c oxidase subunit II (MT-CO2/COX2). {ECO:0000269|PubMed:12370308}.	sp|P56394|COX17_MOUSE	sp|P56394|COX17_MOUSE Cytochrome c oxidase copper chaperone OS=Mus musculus OX=10090 GN=Cox17 PE=1 SV=2	1	1	1	1	25.4	6.784														Identified
P56399	Ubiquitin carboxyl-terminal hydrolase 5	Usp5	FUNCTION: Cleaves linear and branched multiubiquitin polymers with a marked preference for branched polymers. Involved in unanchored 'Lys-48'-linked polyubiquitin disassembly. Binds linear and 'Lys-63'-linked polyubiquitin with a lower affinity (By similarity). {ECO:0000250}.	sp|P56399|UBP5_MOUSE	sp|P56399|UBP5_MOUSE Ubiquitin carboxyl-terminal hydrolase 5 OS=Mus musculus OX=10090 GN=Usp5 PE=1 SV=1	1	3	3	3	4.8	95.832												32894000		Identified
P56480	ATP synthase subunit beta, mitochondrial	Atp5f1b	FUNCTION: Mitochondrial membrane ATP synthase (F(1)F(0) ATP synthase or Complex V) produces ATP from ADP in the presence of a proton gradient across the membrane which is generated by electron transport complexes of the respiratory chain. F-type ATPases consist of two structural domains, F(1) - containing the extramembraneous catalytic core, and F(0) - containing the membrane proton channel, link…	sp|P56480|ATPB_MOUSE	sp|P56480|ATPB_MOUSE ATP synthase subunit beta, mitochondrial OS=Mus musculus OX=10090 GN=Atp5f1b PE=1 SV=2	1	29	29	29	79.2	56.3	517480000000	608660000000	660610000000	532930000000	536710000000	556830000000	454740000000	529770000000	661570000000	640560000000	518500000000	597550000000		Quantified
P56501	Mitochondrial uncoupling protein 3	Ucp3	FUNCTION: UCP are mitochondrial transporter proteins that create proton leaks across the inner mitochondrial membrane, thus uncoupling oxidative phosphorylation. As a result, energy is dissipated in the form of heat. May play a role in the modulation of tissue respiratory control. Participates in thermogenesis and energy balance (By similarity). {ECO:0000250}.	sp|P56501|UCP3_MOUSE	sp|P56501|UCP3_MOUSE Mitochondrial uncoupling protein 3 OS=Mus musculus OX=10090 GN=Ucp3 PE=1 SV=1	1	11	11	11	48.4	33.91	536700000	429550000	519890000	637710000	550200000	575310000	436190000	467360000	519520000	461880000	514040000	493270000		Quantified
P56565	Protein S100-A1	S100a1	FUNCTION: Probably acts as a Ca(2+) signal transducer. In response to an increase in intracellular Ca(2+) levels, binds calcium which triggers a conformational change. This conformational change allows interaction of S1001A with specific target proteins, such as TPR-containing proteins, and the modulation of their activity. {ECO:0000250|UniProtKB:P23297}.	sp|P56565|S10A1_MOUSE	sp|P56565|S10A1_MOUSE Protein S100-A1 OS=Mus musculus OX=10090 GN=S100a1 PE=1 SV=2	1	1	1	1	16	10.505	92510000	118010000		89797000		85002000		120380000	134480000	110630000	118340000	79210000		Quantified
P57776	Elongation factor 1-delta	Eef1d	FUNCTION: [Isoform 1]: EF-1-beta and EF-1-delta stimulate the exchange of GDP bound to EF-1-alpha to GTP, regenerating EF-1-alpha for another round of transfer of aminoacyl-tRNAs to the ribosome. {ECO:0000250}.; FUNCTION: [Isoform 3]: Regulates induction of heat-shock-responsive genes through association with heat shock transcription factors and direct DNA-binding at heat shock promoter elements …	sp|P57776|EF1D_MOUSE	sp|P57776|EF1D_MOUSE Elongation factor 1-delta OS=Mus musculus OX=10090 GN=Eef1d PE=1 SV=3	1	8	8	7	38.4	31.293	119770000	105270000	85125000	99109000	116050000	126370000	107720000	130460000	119300000	104730000	68691000	137880000		Quantified
P57784	U2 small nuclear ribonucleoprotein A	Snrpa1	FUNCTION: Involved in pre-mRNA splicing as component of the spliceosome. Associated with sn-RNP U2, where it contributes to the binding of stem loop IV of U2 snRNA. {ECO:0000250|UniProtKB:P09661}.	sp|P57784|RU2A_MOUSE	sp|P57784|RU2A_MOUSE U2 small nuclear ribonucleoprotein A OS=Mus musculus OX=10090 GN=Snrpa1 PE=1 SV=2	1	3	3	3	13.7	28.357		27269000			40084000		12938000	18155000	39283000		22039000	31102000		Quantified
P58059	28S ribosomal protein S21, mitochondrial	Mrps21		sp|P58059|RT21_MOUSE	sp|P58059|RT21_MOUSE 28S ribosomal protein S21, mitochondrial OS=Mus musculus OX=10090 GN=Mrps21 PE=1 SV=1	1	2	2	2	31	10.561	121970000	117550000	108450000	89604000	86168000	84145000	92670000	110210000	135370000	134190000	104530000	111220000		Quantified
P58252	Elongation factor 2	Eef2	FUNCTION: Catalyzes the GTP-dependent ribosomal translocation step during translation elongation. During this step, the ribosome changes from the pre-translocational (PRE) to the post-translocational (POST) state as the newly formed A-site-bound peptidyl-tRNA and P-site-bound deacylated tRNA move to the P and E sites, respectively. Catalyzes the coordinated movement of the two tRNA molecules, the…	sp|P58252|EF2_MOUSE;sp|O08810|U5S1_MOUSE	sp|P58252|EF2_MOUSE Elongation factor 2 OS=Mus musculus OX=10090 GN=Eef2 PE=1 SV=2	2	39	39	39	56.8	95.313	3366800000	3267400000	3179400000	2905600000	3154000000	3402800000	2999900000	3216300000	3795400000	4659800000	3825900000	3840900000		Quantified
P58281	Dynamin-like 120 kDa protein, mitochondrial	Opa1	FUNCTION: Dynamin-related GTPase that is essential for normal mitochondrial morphology by regulating the equilibrium between mitochondrial fusion and mitochondrial fission (PubMed:11847212, PubMed:24616225, PubMed:26785494, PubMed:28746876). Coexpression of isoform 1 with shorter alternative products is required for optimal activity in promoting mitochondrial fusion (By similarity). Binds lipid m…	sp|P58281|OPA1_MOUSE;sp|P58682|TLR8_MOUSE	sp|P58281|OPA1_MOUSE Dynamin-like 120 kDa protein, mitochondrial OS=Mus musculus OX=10090 GN=Opa1 PE=1 SV=1	2	41	41	41	49.9	111.34	4529200000	3879500000	4795700000	4504200000	4735200000	4534000000	3404900000	4751100000	3818500000	4361300000	5098100000	4026200000		Quantified
P58771	Tropomyosin alpha-1 chain	Tpm1	FUNCTION: Binds to actin filaments in muscle and non-muscle cells. Plays a central role, in association with the troponin complex, in the calcium dependent regulation of vertebrate striated muscle contraction. Smooth muscle contraction is regulated by interaction with caldesmon. In non-muscle cells is implicated in stabilizing cytoskeleton actin filaments. {ECO:0000250|UniProtKB:P09493}.	sp|P58771|TPM1_MOUSE	sp|P58771|TPM1_MOUSE Tropomyosin alpha-1 chain OS=Mus musculus OX=10090 GN=Tpm1 PE=1 SV=1	1	38	38	18	75.4	32.68	219120000000	227540000000	289630000000	161440000000	244310000000	272500000000	337210000000	210670000000	363130000000	339090000000	301770000000	338470000000		Quantified
P58774	Tropomyosin beta chain	Tpm2	FUNCTION: Binds to actin filaments in muscle and non-muscle cells. Plays a central role, in association with the troponin complex, in the calcium dependent regulation of vertebrate striated muscle contraction. Smooth muscle contraction is regulated by interaction with caldesmon. In non-muscle cells is implicated in stabilizing cytoskeleton actin filaments. The non-muscle isoform may have a role i…	sp|P58774|TPM2_MOUSE	sp|P58774|TPM2_MOUSE Tropomyosin beta chain OS=Mus musculus OX=10090 GN=Tpm2 PE=1 SV=1	1	21	8	1	43.7	32.836	339910000	583800000	547580000	272440000	388250000	535250000	914770000	505800000	734170000	641280000	742780000	745510000		Quantified
P59017	Bcl-2-like protein 13	Bcl2l13	FUNCTION: May promote the activation of caspase-3 and apoptosis.	sp|P59017|B2L13_MOUSE	sp|P59017|B2L13_MOUSE Bcl-2-like protein 13 OS=Mus musculus OX=10090 GN=Bcl2l13 PE=1 SV=2	1	6	6	6	17.3	46.719	66045000	59862000	62046000	83173000	57953000	63706000	72793000	59556000	89667000	50335000	63061000	65319000		Quantified
P59041	DnaJ homolog subfamily C member 30, mitochondrial	Dnajc30	FUNCTION: Mitochondrial protein enriched in neurons that acts as a regulator of mitochondrial respiration (PubMed:30318146). Associates with the ATP synthase complex and facilitates ATP synthesis (PubMed:30318146). {ECO:0000269|PubMed:30318146}.	sp|P59041|DJC30_MOUSE	sp|P59041|DJC30_MOUSE DnaJ homolog subfamily C member 30, mitochondrial OS=Mus musculus OX=10090 GN=Dnajc30 PE=1 SV=1	1	2	2	2	11.9	24.762								16321000						Identified
P59266	Fat storage-inducing transmembrane protein 2	Fitm2	FUNCTION: Plays an important role in the formation of lipid droplets (LDs) which are storage organelles at the center of lipid and energy homeostasis (PubMed:18160536, PubMed:26504167). Facilitates nascent LD protrusion and budding from the endoplasmic reticulum toward the cytoplasm (PubMed:26504167). Plays a role in the regulation of cell morphology and cytoskeletal organization (By similarity).…	sp|P59266|FITM2_MOUSE	sp|P59266|FITM2_MOUSE Fat storage-inducing transmembrane protein 2 OS=Mus musculus OX=10090 GN=Fitm2 PE=1 SV=1	1	2	2	2	8.4	30.016	129960000	79663000	359590000	134290000	324320000	296330000	90774000	268730000	144270000	253900000	165180000	90046000		Quantified
P59326	YTH domain-containing family protein 1	Ythdf1	FUNCTION: Specifically recognizes and binds N6-methyladenosine (m6A)-containing mRNAs, and promotes mRNA translation efficiency (PubMed:30401835). M6A is a modification present at internal sites of mRNAs and some non-coding RNAs and plays a role in the efficiency of mRNA splicing, processing and stability (PubMed:30401835). Acts as a regulator of mRNA translation efficiency: promotes ribosome loa…	sp|P59326|YTHD1_MOUSE;sp|Q91YT7|YTHD2_MOUSE	sp|P59326|YTHD1_MOUSE YTH domain-containing family protein 1 OS=Mus musculus OX=10090 GN=Ythdf1 PE=1 SV=1;sp|Q91YT7|YTHD2_MOUSE YTH domain-containing family protein 2 OS=Mus musculus OX=10090 GN=Ythdf2 PE=1 SV=1	2	2	2	2	5.4	60.878	26392000	9820500		11598000	12073000	20317000	13717000	12965000		11370000		14433000		Quantified
P59999	Actin-related protein 2/3 complex subunit 4	Arpc4	FUNCTION: Actin-binding component of the Arp2/3 complex, a multiprotein complex that mediates actin polymerization upon stimulation by nucleation-promoting factor (NPF). The Arp2/3 complex mediates the formation of branched actin networks in the cytoplasm, providing the force for cell motility. In addition to its role in the cytoplasmic cytoskeleton, the Arp2/3 complex also promotes actin polymer…	sp|P59999|ARPC4_MOUSE	sp|P59999|ARPC4_MOUSE Actin-related protein 2/3 complex subunit 4 OS=Mus musculus OX=10090 GN=Arpc4 PE=1 SV=3	1	5	5	5	33.9	19.667	73154000	101210000	88099000	85123000	107060000	59922000	176500000	78092000	105770000	91393000	113380000	99097000		Quantified
P60122	RuvB-like 1	Ruvbl1	FUNCTION: Possesses single-stranded DNA-stimulated ATPase and ATP-dependent DNA helicase (3' to 5') activity; hexamerization is thought to be critical for ATP hydrolysis and adjacent subunits in the ring-like structure contribute to the ATPase activity (By similarity). Component of the NuA4 histone acetyltransferase complex which is involved in transcriptional activation of select genes principal…	sp|P60122|RUVB1_MOUSE	sp|P60122|RUVB1_MOUSE RuvB-like 1 OS=Mus musculus OX=10090 GN=Ruvbl1 PE=1 SV=1	1	6	6	6	21.3	50.213		24039000		20390000	30523000	37239000	21555000	25615000	14013000	29170000	19013000	26030000		Quantified
P60229	Eukaryotic translation initiation factor 3 subunit E	Eif3e	FUNCTION: Component of the eukaryotic translation initiation factor 3 (eIF-3) complex, which is required for several steps in the initiation of protein synthesis. The eIF-3 complex associates with the 40S ribosome and facilitates the recruitment of eIF-1, eIF-1A, eIF-2:GTP:methionyl-tRNAi and eIF-5 to form the 43S pre-initiation complex (43S PIC). The eIF-3 complex stimulates mRNA recruitment to …	sp|P60229|EIF3E_MOUSE	sp|P60229|EIF3E_MOUSE Eukaryotic translation initiation factor 3 subunit E OS=Mus musculus OX=10090 GN=Eif3e PE=1 SV=1	1	15	15	15	41.1	52.22	266960000	268190000	283220000	400600000	277360000	361550000	250210000	256860000	328330000	405040000	333100000	311290000		Quantified
P60335	Poly(rC)-binding protein 1	Pcbp1	FUNCTION: Single-stranded nucleic acid binding protein that binds preferentially to oligo dC. {ECO:0000250}.	sp|P60335|PCBP1_MOUSE	sp|P60335|PCBP1_MOUSE Poly(rC)-binding protein 1 OS=Mus musculus OX=10090 GN=Pcbp1 PE=1 SV=1	1	12	12	8	48.6	37.497	1109700000	996460000	1175700000	1124600000	1026200000	1041000000	752630000	1034100000	1010500000	1388400000	1283400000	967920000		Quantified
P60603	Reactive oxygen species modulator 1	Romo1	FUNCTION: Has antibacterial activity against a variety of bacteria including S.aureus, P.aeruginosa and M.tuberculosis. Acts by inducing bacterial membrane breakage (By similarity). {ECO:0000250}.; FUNCTION: Induces production of reactive oxygen species (ROS) which are necessary for cell proliferation. May play a role in inducing oxidative DNA damage and replicative senescence. May play a role in…	sp|P60603|ROMO1_MOUSE	sp|P60603|ROMO1_MOUSE Reactive oxygen species modulator 1 OS=Mus musculus OX=10090 GN=Romo1 PE=2 SV=1	1	2	2	2	31.6	8.1828	84809000	91613000	74552000	82674000	78341000	59025000		46655000	102000000	73603000	63853000	60963000		Quantified
P60670	Nuclear protein localization protein 4 homolog	Nploc4	FUNCTION: The ternary complex containing UFD1, VCP and NPLOC4 binds ubiquitinated proteins and is necessary for the export of misfolded proteins from the ER to the cytoplasm, where they are degraded by the proteasome. The NPLOC4-UFD1-VCP complex regulates spindle disassembly at the end of mitosis and is necessary for the formation of a closed nuclear envelope (By similarity). Acts as a negative r…	sp|P60670|NPL4_MOUSE	sp|P60670|NPL4_MOUSE Nuclear protein localization protein 4 homolog OS=Mus musculus OX=10090 GN=Nploc4 PE=1 SV=3	1	4	4	4	6.7	68.016				15354000										Identified
P60710	Actin, cytoplasmic 1	Actb	FUNCTION: Actin is a highly conserved protein that polymerizes to produce filaments that form cross-linked networks in the cytoplasm of cells (By similarity). Actin exists in both monomeric (G-actin) and polymeric (F-actin) forms, both forms playing key functions, such as cell motility and contraction (By similarity). In addition to their role in the cytoplasmic cytoskeleton, G- and F-actin also …	sp|P60710|ACTB_MOUSE	sp|P60710|ACTB_MOUSE Actin, cytoplasmic 1 OS=Mus musculus OX=10090 GN=Actb PE=1 SV=1	1	23	1	1	76	41.736	1270200000	2186400000	1493000000	853700000	1089500000	1379800000	2330800000	1574700000	2311100000	1475300000	1261900000	1788000000		Quantified
P60766	Cell division control protein 42 homolog	Cdc42	FUNCTION: Plasma membrane-associated small GTPase which cycles between an active GTP-bound and an inactive GDP-bound state (PubMed:24352656). In its active state binds to a variety of effector proteins to regulate cellular responses. Involved in epithelial cell polarization processes. Regulates the bipolar attachment of spindle microtubules to kinetochores before chromosome congression in metapha…	sp|P60766|CDC42_MOUSE;sp|Q8R527|RHOQ_MOUSE;sp|Q9ER71|RHOJ_MOUSE	sp|P60766|CDC42_MOUSE Cell division control protein 42 homolog OS=Mus musculus OX=10090 GN=Cdc42 PE=1 SV=2	3	8	7	7	48.2	21.258	436460000	623200000	771670000	700480000	763680000	714650000	702600000	852850000	871690000	611950000	749100000	777490000		Quantified
P60843	Eukaryotic initiation factor 4A-I	Eif4a1	FUNCTION: ATP-dependent RNA helicase which is a subunit of the eIF4F complex involved in cap recognition and is required for mRNA binding to ribosome. In the current model of translation initiation, eIF4A unwinds RNA secondary structures in the 5'-UTR of mRNAs which is necessary to allow efficient binding of the small ribosomal subunit, and subsequent scanning for the initiator codon.	sp|P60843|IF4A1_MOUSE	sp|P60843|IF4A1_MOUSE Eukaryotic initiation factor 4A-I OS=Mus musculus OX=10090 GN=Eif4a1 PE=1 SV=1	1	18	18	8	52.7	46.153	2261500000	1930600000	1748500000	2031400000	1844300000	1947900000	1651000000	1761400000	2414200000	1887500000	1864400000	2343800000		Quantified
P60867	40S ribosomal protein S20	Rps20		sp|P60867|RS20_MOUSE	sp|P60867|RS20_MOUSE 40S ribosomal protein S20 OS=Mus musculus OX=10090 GN=Rps20 PE=1 SV=1	1	3	3	3	25.2	13.373	1098300000	918560000	986320000	1156800000	1191900000	1169200000	802730000	1258100000	917230000	1348800000	961330000	995300000		Quantified
P61014	Cardiac phospholamban	Pln	FUNCTION: Reversibly inhibits the activity of ATP2A2 in cardiac sarcoplasmic reticulum by decreasing the apparent affinity of the ATPase for Ca(2+). Modulates the contractility of the heart muscle in response to physiological stimuli via its effects on ATP2A2. Modulates calcium re-uptake during muscle relaxation and plays an important role in calcium homeostasis in the heart muscle. The degree of…	sp|P61014|PPLA_MOUSE	sp|P61014|PPLA_MOUSE Cardiac phospholamban OS=Mus musculus OX=10090 GN=Pln PE=1 SV=1	1	1	1	1	21.2	6.0945	257380000	488160000	353320000	554460000	202530000	625270000	243130000	686040000	307150000	415710000	401320000	514540000		Quantified
P61021	Ras-related protein Rab-5B	Rab5b	FUNCTION: Protein transport. Probably involved in vesicular traffic (By similarity). {ECO:0000250}.	sp|P61021|RAB5B_MOUSE	sp|P61021|RAB5B_MOUSE Ras-related protein Rab-5B OS=Mus musculus OX=10090 GN=Rab5b PE=1 SV=1	1	8	5	5	47.9	23.707	442530000	463460000	494220000	497310000	516180000	569640000	377430000	504640000	449200000	441810000	487190000	358840000		Quantified
P61027	Ras-related protein Rab-10	Rab10	FUNCTION: The small GTPases Rab are key regulators of intracellular membrane trafficking, from the formation of transport vesicles to their fusion with membranes (By similarity). Rabs cycle between an inactive GDP-bound form and an active GTP-bound form that is able to recruit to membranes different set of downstream effectors directly responsible for vesicle formation, movement, tethering and fu…	sp|P61027|RAB10_MOUSE	sp|P61027|RAB10_MOUSE Ras-related protein Rab-10 OS=Mus musculus OX=10090 GN=Rab10 PE=1 SV=1	1	11	10	10	61	22.541	1706600000	2137100000	2441800000	1791200000	2041000000	2043100000	2024000000	2131000000	1910300000	2378300000	2568900000	2123900000		Quantified
P61028	Ras-related protein Rab-8B	Rab8b	FUNCTION: The small GTPases Rab are key regulators of intracellular membrane trafficking, from the formation of transport vesicles to their fusion with membranes. Rabs cycle between an inactive GDP-bound form and an active GTP-bound form that is able to recruit to membranes different sets of downstream effectors directly responsible for vesicle formation, movement, tethering and fusion. That Rab …	sp|P61028|RAB8B_MOUSE	sp|P61028|RAB8B_MOUSE Ras-related protein Rab-8B OS=Mus musculus OX=10090 GN=Rab8b PE=1 SV=1	1	5	1	1	26.6	23.603	69361000	57250000	50668000	45528000		61578000		60434000	62935000		73543000			Quantified
P62838	Ubiquitin-conjugating enzyme E2 D2	Ube2d2	FUNCTION: Accepts ubiquitin from the E1 complex and catalyzes its covalent attachment to other proteins. In vitro catalyzes 'Lys-48'-linked polyubiquitination. Mediates the selective degradation of short-lived and abnormal proteins. Functions in the E6/E6-AP-induced ubiquitination of p53/TP53. Mediates ubiquitination of PEX5 and autoubiquitination of STUB1 and TRAF6. Involved in the signal-induce…	sp|P62838|UB2D2_MOUSE;sp|P61079|UB2D3_MOUSE;sp|Q6ZWY6|U2D2B_MOUSE;sp|P61080|UB2D1_MOUSE	sp|P62838|UB2D2_MOUSE Ubiquitin-conjugating enzyme E2 D2 OS=Mus musculus OX=10090 GN=Ube2d2 PE=1 SV=1;sp|P61079|UB2D3_MOUSE Ubiquitin-conjugating enzyme E2 D3 OS=Mus musculus OX=10090 GN=Ube2d3 PE=1 SV=1	4	3	3	3	36.1	16.735	119440000	94586000	118850000	95380000	147450000	121140000	110860000	110540000	142720000	167660000	218730000	108870000		Quantified
P61082	NEDD8-conjugating enzyme Ubc12	Ube2m	FUNCTION: Accepts the ubiquitin-like protein NEDD8 from the UBA3-NAE1 E1 complex and catalyzes its covalent attachment to other proteins. The specific interaction with the E3 ubiquitin ligase RBX1, but not RBX2, suggests that the RBX1-UBE2M complex neddylates specific target proteins, such as CUL1, CUL2, CUL3 and CUL4. Involved in cell proliferation (By similarity). {ECO:0000250}.	sp|P61082|UBC12_MOUSE	sp|P61082|UBC12_MOUSE NEDD8-conjugating enzyme Ubc12 OS=Mus musculus OX=10090 GN=Ube2m PE=1 SV=1	1	5	5	5	26.8	20.9	47492000		132570000	89087000	52763000		142870000		192100000	168000000	102170000			Quantified
P61089	Ubiquitin-conjugating enzyme E2 N	Ube2n	FUNCTION: The UBE2V1-UBE2N and UBE2V2-UBE2N heterodimers catalyze the synthesis of non-canonical 'Lys-63'-linked polyubiquitin chains (PubMed:22424771, PubMed:28039360). This type of polyubiquitination does not lead to protein degradation by the proteasome. Mediates transcriptional activation of target genes. Plays a role in the control of progress through the cell cycle and differentiation. Play…	sp|P61089|UBE2N_MOUSE;sp|Q9CQ37|UBE2T_MOUSE	sp|P61089|UBE2N_MOUSE Ubiquitin-conjugating enzyme E2 N OS=Mus musculus OX=10090 GN=Ube2n PE=1 SV=1	2	5	5	5	50	17.138	264230000	381970000	315120000	348140000	297480000	262580000	217950000	302730000	289160000	425910000	364400000	397420000		Quantified
P61148	Fibroblast growth factor 1	Fgf1	FUNCTION: Plays an important role in the regulation of cell survival, cell division, angiogenesis, cell differentiation and cell migration. Functions as potent mitogen in vitro. Acts as a ligand for FGFR1 and integrins. Binds to FGFR1 in the presence of heparin leading to FGFR1 dimerization and activation via sequential autophosphorylation on tyrosine residues which act as docking sites for inter…	sp|P61148|FGF1_MOUSE	sp|P61148|FGF1_MOUSE Fibroblast growth factor 1 OS=Mus musculus OX=10090 GN=Fgf1 PE=1 SV=1	1	2	2	2	13.5	17.417	12747000		16695000	16033000	22176000	18967000	11504000	21024000	21262000	18861000	21281000	30040000		Quantified
P61161	Actin-related protein 2	Actr2	FUNCTION: ATP-binding component of the Arp2/3 complex, a multiprotein complex that mediates actin polymerization upon stimulation by nucleation-promoting factor (NPF). The Arp2/3 complex mediates the formation of branched actin networks in the cytoplasm, providing the force for cell motility. Seems to contact the pointed end of the daughter actin filament. In podocytes, required for the formation…	sp|P61161|ARP2_MOUSE	sp|P61161|ARP2_MOUSE Actin-related protein 2 OS=Mus musculus OX=10090 GN=Actr2 PE=1 SV=1	1	10	10	10	31	44.76	180570000	190850000	120560000	131090000	196320000	143680000	257730000	208520000	163520000	206200000	126770000	152120000		Quantified
P61164	Alpha-centractin	Actr1a	FUNCTION: Component of a multi-subunit complex involved in microtubule based vesicle motility. It is associated with the centrosome.	sp|P61164|ACTZ_MOUSE	sp|P61164|ACTZ_MOUSE Alpha-centractin OS=Mus musculus OX=10090 GN=Actr1a PE=1 SV=1	1	12	12	6	43.1	42.613	1446400000	1462200000	1215900000	879990000	1187300000	1183000000	1948900000	1319800000	2077400000	1603900000	1373200000	1596000000		Quantified
P61211	ADP-ribosylation factor-like protein 1	Arl1	FUNCTION: GTP-binding protein. Can activate phospholipase D with very low efficiency. Important for normal function of the Golgi apparatus (By similarity). {ECO:0000250}.	sp|P61211|ARL1_MOUSE	sp|P61211|ARL1_MOUSE ADP-ribosylation factor-like protein 1 OS=Mus musculus OX=10090 GN=Arl1 PE=1 SV=1	1	6	6	6	47.5	20.411	143270000	85474000	83932000	112070000	70164000	106670000	61808000	106900000	107650000	102690000	81619000	53480000		Quantified
P61222	ATP-binding cassette sub-family E member 1	Abce1	FUNCTION: Antagonizes the binding of 2-5A (5'-phosphorylated 2',5'-linked oligoadenylates) by RNase L through direct interaction with RNase L and therefore inhibits its endoribonuclease activity. May play a central role in the regulation of mRNA turnover. Antagonizes the anti-viral effect of the interferon-regulated 2-5A/RNase L pathway (By similarity). {ECO:0000250, ECO:0000269|PubMed:10866653}.	sp|P61222|ABCE1_MOUSE	sp|P61222|ABCE1_MOUSE ATP-binding cassette sub-family E member 1 OS=Mus musculus OX=10090 GN=Abce1 PE=1 SV=1	1	14	14	14	31.6	67.314	417510000	499500000	438530000	468730000	441000000	454050000	339120000	436610000	470570000	501750000	518730000	480520000		Quantified
P61255	60S ribosomal protein L26	Rpl26	FUNCTION: Component of the large ribosomal subunit. {ECO:0000305|PubMed:26100019}.	sp|P61255|RL26_MOUSE	sp|P61255|RL26_MOUSE 60S ribosomal protein L26 OS=Mus musculus OX=10090 GN=Rpl26 PE=1 SV=1	1	8	8	8	44.1	17.258	2262400000	1530200000	1770100000	2398700000	2391700000	2280100000	1881400000	1984700000	1860000000	2522200000	2305800000	2157600000		Quantified
P61358	60S ribosomal protein L27	Rpl27	FUNCTION: Component of the large ribosomal subunit (By similarity). Required for proper rRNA processing and maturation of 28S and 5.8S rRNAs (By similarity). {ECO:0000250|UniProtKB:A1XQU5, ECO:0000250|UniProtKB:P61353}.	sp|P61358|RL27_MOUSE	sp|P61358|RL27_MOUSE 60S ribosomal protein L27 OS=Mus musculus OX=10090 GN=Rpl27 PE=1 SV=2	1	5	5	5	42.6	15.798	1669700000	1950800000	1050800000	1852200000	1794000000	1318900000	1754800000	1777400000	1473500000	1413700000	1552800000	1968700000		Quantified
P61514	60S ribosomal protein L37a	Rpl37a		sp|P61514|RL37A_MOUSE	sp|P61514|RL37A_MOUSE 60S ribosomal protein L37a OS=Mus musculus OX=10090 GN=Rpl37a PE=1 SV=2	1	4	4	4	50	10.275	389170000	258450000	226620000	324300000	272230000	347210000	328290000	295990000	238650000	216940000	240490000	333200000		Quantified
P61620	Protein transport protein Sec61 subunit alpha isoform 1	Sec61a1	FUNCTION: Component of SEC61 channel-forming translocon complex that mediates transport of signal peptide-containing precursor polypeptides across endoplasmic reticulum (ER). Forms a ribosome receptor and a gated pore in the ER membrane, both functions required for cotranslational translocation of nascent polypeptides. May cooperate with auxiliary protein SEC62, SEC63 and HSPA5/BiP to enable post…	sp|P61620|S61A1_MOUSE	sp|P61620|S61A1_MOUSE Protein transport protein Sec61 subunit alpha isoform 1 OS=Mus musculus OX=10090 GN=Sec61a1 PE=1 SV=2	1	5	5	3	10.5	52.264	168030000	109620000	199000000	183080000	156410000	189290000	105720000	192470000	98223000	214570000	193060000	160240000		Quantified
P61750	ADP-ribosylation factor 4	Arf4	FUNCTION: GTP-binding protein that functions as an allosteric activator of the cholera toxin catalytic subunit, an ADP-ribosyltransferase. Involved in protein trafficking; may modulate vesicle budding and uncoating within the Golgi apparatus.	sp|P61750|ARF4_MOUSE	sp|P61750|ARF4_MOUSE ADP-ribosylation factor 4 OS=Mus musculus OX=10090 GN=Arf4 PE=1 SV=2	1	9	4	4	64.4	20.396	186030000	46970000		128830000	112460000	124200000		123400000	499890000	110140000	143670000	76830000		Quantified
P61804	Dolichyl-diphosphooligosaccharide--protein glycosyltransferase subunit DAD1	Dad1	FUNCTION: Subunit of the oligosaccharyl transferase (OST) complex that catalyzes the initial transfer of a defined glycan (Glc(3)Man(9)GlcNAc(2) in eukaryotes) from the lipid carrier dolichol-pyrophosphate to an asparagine residue within an Asn-X-Ser/Thr consensus motif in nascent polypeptide chains, the first step in protein N-glycosylation. N-glycosylation occurs cotranslationally and the compl…	sp|P61804|DAD1_MOUSE	sp|P61804|DAD1_MOUSE Dolichyl-diphosphooligosaccharide--protein glycosyltransferase subunit DAD1 OS=Mus musculus OX=10090 GN=Dad1 PE=1 SV=3	1	3	3	3	28.3	12.497	144940000	100330000	99336000	123330000	116140000	143350000	95874000	138290000	93827000	98494000	101070000	121340000		Quantified
P61979	Heterogeneous nuclear ribonucleoprotein K	Hnrnpk	FUNCTION: One of the major pre-mRNA-binding proteins. Binds tenaciously to poly(C) sequences. Likely to play a role in the nuclear metabolism of hnRNAs, particularly for pre-mRNAs that contain cytidine-rich sequences. Can also bind poly(C) single-stranded DNA. Plays an important role in p53/TP53 response to DNA damage, acting at the level of both transcription activation and repression. When sumo…	sp|P61979|HNRPK_MOUSE	sp|P61979|HNRPK_MOUSE Heterogeneous nuclear ribonucleoprotein K OS=Mus musculus OX=10090 GN=Hnrnpk PE=1 SV=1	1	16	16	16	43.8	50.976	1233200000	1007100000	1115400000	1226900000	1153900000	1178400000	804770000	926600000	1183200000	1044900000	985020000	1222000000		Quantified
P62071	Ras-related protein R-Ras2	Rras2	FUNCTION: GTP-binding protein with GTPase activity involved in the regulation of MAPK signaling pathway, thereby controlling multiple cellular processes. Involved in the regulation of MAPK signaling pathway. Regulation of craniofacial development. {ECO:0000250|UniProtKB:P62070}.	sp|P62071|RRAS2_MOUSE	sp|P62071|RRAS2_MOUSE Ras-related protein R-Ras2 OS=Mus musculus OX=10090 GN=Rras2 PE=1 SV=1	1	8	8	7	41.7	23.399	459510000	470150000	482550000	517680000	519600000	437510000	394430000	471450000	482900000	490380000	475100000	401420000		Quantified
P62075	Mitochondrial import inner membrane translocase subunit Tim13	Timm13	FUNCTION: Mitochondrial intermembrane chaperone that participates in the import and insertion of some multi-pass transmembrane proteins into the mitochondrial inner membrane. Also required for the transfer of beta-barrel precursors from the TOM complex to the sorting and assembly machinery (SAM complex) of the outer membrane. Acts as a chaperone-like protein that protects the hydrophobic precurso…	sp|P62075|TIM13_MOUSE	sp|P62075|TIM13_MOUSE Mitochondrial import inner membrane translocase subunit Tim13 OS=Mus musculus OX=10090 GN=Timm13 PE=1 SV=1	1	2	2	2	26.3	10.458	47559000	60291000	43721000	27232000	42136000	42447000	128820000	66664000	98468000	57571000		81669000		Quantified
P62082	40S ribosomal protein S7	Rps7	FUNCTION: Required for rRNA maturation. {ECO:0000250|UniProtKB:P62081}.	sp|P62082|RS7_MOUSE	sp|P62082|RS7_MOUSE 40S ribosomal protein S7 OS=Mus musculus OX=10090 GN=Rps7 PE=2 SV=1	1	9	9	9	59.3	22.127	3093600000	2325600000	2335300000	3353800000	2987600000	3513200000	2679000000	3157000000	2695500000	2860400000	2942300000	3103800000		Quantified
P62137	Serine/threonine-protein phosphatase PP1-alpha catalytic subunit	Ppp1ca	FUNCTION: Protein phosphatase that associates with over 200 regulatory proteins to form highly specific holoenzymes which dephosphorylate hundreds of biological targets. Protein phosphatase 1 (PP1) is essential for cell division, and participates in the regulation of glycogen metabolism, muscle contractility and protein synthesis. Involved in regulation of ionic conductances and long-term synapti…	sp|P62137|PP1A_MOUSE	sp|P62137|PP1A_MOUSE Serine/threonine-protein phosphatase PP1-alpha catalytic subunit OS=Mus musculus OX=10090 GN=Ppp1ca PE=1 SV=1	1	12	2	1	45.5	37.54	125350000	126500000	133520000	102690000	102380000	126020000	123730000	99731000	125430000	205300000	138660000	126320000		Quantified
P62141	Serine/threonine-protein phosphatase PP1-beta catalytic subunit	Ppp1cb	FUNCTION: Protein phosphatase that associates with over 200 regulatory proteins to form highly specific holoenzymes which dephosphorylate hundreds of biological targets. Protein phosphatase (PP1) is essential for cell division, it participates in the regulation of glycogen metabolism, muscle contractility and protein synthesis. Involved in regulation of ionic conductances and long-term synaptic p…	sp|P62141|PP1B_MOUSE	sp|P62141|PP1B_MOUSE Serine/threonine-protein phosphatase PP1-beta catalytic subunit OS=Mus musculus OX=10090 GN=Ppp1cb PE=1 SV=3	1	16	16	6	63.9	37.186	2201800000	1862300000	1869600000	1842300000	1914300000	2028000000	1784200000	1911900000	1893800000	1798900000	2227100000	1856700000		Quantified
P62192	26S proteasome regulatory subunit 4	Psmc1	FUNCTION: Component of the 26S proteasome, a multiprotein complex involved in the ATP-dependent degradation of ubiquitinated proteins. This complex plays a key role in the maintenance of protein homeostasis by removing misfolded or damaged proteins, which could impair cellular functions, and by removing proteins whose functions are no longer required. Therefore, the proteasome participates in num…	sp|P62192|PRS4_MOUSE	sp|P62192|PRS4_MOUSE 26S proteasome regulatory subunit 4 OS=Mus musculus OX=10090 GN=Psmc1 PE=1 SV=1	1	7	7	7	18	49.184	54512000	95281000	97244000	123600000	133860000	121530000	48516000	87757000	70868000	109850000	106030000	54008000		Quantified
P62196	26S proteasome regulatory subunit 8	Psmc5	FUNCTION: Component of the 26S proteasome, a multiprotein complex involved in the ATP-dependent degradation of ubiquitinated proteins. This complex plays a key role in the maintenance of protein homeostasis by removing misfolded or damaged proteins, which could impair cellular functions, and by removing proteins whose functions are no longer required. Therefore, the proteasome participates in num…	sp|P62196|PRS8_MOUSE	sp|P62196|PRS8_MOUSE 26S proteasome regulatory subunit 8 OS=Mus musculus OX=10090 GN=Psmc5 PE=1 SV=1	1	16	16	16	47	45.626	393950000	396380000	397580000	403740000	280860000	349860000	149380000	359070000	378890000	406440000	457570000	350610000		Quantified
P62242	40S ribosomal protein S8	Rps8		sp|P62242|RS8_MOUSE	sp|P62242|RS8_MOUSE 40S ribosomal protein S8 OS=Mus musculus OX=10090 GN=Rps8 PE=1 SV=2	1	8	8	8	45.7	24.205	1546200000	1177300000	1013600000	1539400000	1317200000	1337300000	1375400000	1132700000	1114300000	1096100000	988810000	1384500000		Quantified
P62245	40S ribosomal protein S15a	Rps15a	FUNCTION: Structural component of the ribosome. Required for proper erythropoiesis. {ECO:0000250|UniProtKB:P62244}.	sp|P62245|RS15A_MOUSE	sp|P62245|RS15A_MOUSE 40S ribosomal protein S15a OS=Mus musculus OX=10090 GN=Rps15a PE=1 SV=2	1	6	6	6	51.5	14.839	1434200000	1198900000	1075100000	1110000000	1005800000	1047000000	1053900000	1195700000	1313800000	1222200000	1112900000	1248000000		Quantified
P62259	14-3-3 protein epsilon	Ywhae	FUNCTION: Adapter protein implicated in the regulation of a large spectrum of both general and specialized signaling pathways. Binds to a large number of partners, usually by recognition of a phosphoserine or phosphothreonine motif. Binding generally results in the modulation of the activity of the binding partner. Positively regulates phosphorylated protein HSF1 nuclear export to the cytoplasm. …	sp|P62259|1433E_MOUSE	sp|P62259|1433E_MOUSE 14-3-3 protein epsilon OS=Mus musculus OX=10090 GN=Ywhae PE=1 SV=1	1	7	4	4	25.5	29.174	29284000	41224000	66589000	25170000	25619000	33062000		55279000	25192000	90187000	50443000	54740000		Quantified
P62264	40S ribosomal protein S14	Rps14		sp|P62264|RS14_MOUSE	sp|P62264|RS14_MOUSE 40S ribosomal protein S14 OS=Mus musculus OX=10090 GN=Rps14 PE=1 SV=3	1	7	7	7	63.6	16.273	1565800000	1395900000	1673100000	2024400000	2078600000	1969000000	1591200000	1651800000	1450200000	1897100000	1576600000	1427700000		Quantified
P62267	40S ribosomal protein S23	Rps23	FUNCTION: Component of the ribosome, a large ribonucleoprotein complex responsible for the synthesis of proteins in the cell. The small ribosomal subunit (SSU) binds messenger RNAs (mRNAs) and translates the encoded message by selecting cognate aminoacyl-transfer RNA (tRNA) molecules. The large subunit (LSU) contains the ribosomal catalytic site termed the peptidyl transferase center (PTC), which…	sp|P62267|RS23_MOUSE	sp|P62267|RS23_MOUSE 40S ribosomal protein S23 OS=Mus musculus OX=10090 GN=Rps23 PE=1 SV=3	1	4	4	4	39.9	15.807	769380000	739710000	546270000	352590000	535350000	277770000	538290000	530750000	650120000	355240000	479990000	541420000		Quantified
P62270	40S ribosomal protein S18	Rps18	FUNCTION: Located at the top of the head of the 40S subunit, it contacts several helices of the 18S rRNA. {ECO:0000250}.	sp|P62270|RS18_MOUSE	sp|P62270|RS18_MOUSE 40S ribosomal protein S18 OS=Mus musculus OX=10090 GN=Rps18 PE=1 SV=3	1	9	9	9	52.6	17.718	1027400000	821520000	677890000	1127500000	794130000	771710000	1134300000	727570000	899250000	715440000	672480000	1085300000		Quantified
P62281	40S ribosomal protein S11	Rps11		sp|P62281|RS11_MOUSE	sp|P62281|RS11_MOUSE 40S ribosomal protein S11 OS=Mus musculus OX=10090 GN=Rps11 PE=1 SV=3	1	10	10	10	49.4	18.431	1412900000	1189900000	1230300000	1471600000	1247400000	1585200000	1244200000	1324100000	1017100000	1390100000	1146400000	1349600000		Quantified
P62301	40S ribosomal protein S13	Rps13		sp|P62301|RS13_MOUSE	sp|P62301|RS13_MOUSE 40S ribosomal protein S13 OS=Mus musculus OX=10090 GN=Rps13 PE=1 SV=2	1	6	6	6	42.4	17.222	2848200000	2359200000	2000200000	2372400000	2227800000	2415200000	2445100000	2627000000	1989900000	2156600000	1907600000	2523200000		Quantified
P62331	ADP-ribosylation factor 6	Arf6	FUNCTION: GTP-binding protein involved in protein trafficking that regulates endocytic recycling and cytoskeleton remodeling (PubMed:11950392). Required for normal completion of mitotic cytokinesis. Involved in the regulation of dendritic spine development, contributing to the regulation of dendritic branching and filopodia extension. Plays an important role in membrane trafficking, during juncti…	sp|P62331|ARF6_MOUSE	sp|P62331|ARF6_MOUSE ADP-ribosylation factor 6 OS=Mus musculus OX=10090 GN=Arf6 PE=1 SV=2	1	3	3	3	22.9	20.082	30185000	34573000	30468000	36280000	45654000	32060000	28442000	42700000	33343000	34236000	38497000	42173000		Quantified
P62334	26S proteasome regulatory subunit 10B	Psmc6	FUNCTION: Component of the 26S proteasome, a multiprotein complex involved in the ATP-dependent degradation of ubiquitinated proteins. This complex plays a key role in the maintenance of protein homeostasis by removing misfolded or damaged proteins, which could impair cellular functions, and by removing proteins whose functions are no longer required. Therefore, the proteasome participates in num…	sp|P62334|PRS10_MOUSE	sp|P62334|PRS10_MOUSE 26S proteasome regulatory subunit 10B OS=Mus musculus OX=10090 GN=Psmc6 PE=1 SV=1	1	8	8	8	25.2	44.172	88657000	50576000		105440000	68224000	83319000		62734000	76539000	123840000	119150000	56289000		Quantified
P62342	Thioredoxin reductase-like selenoprotein T	Selenot	FUNCTION: Selenoprotein with thioredoxin reductase-like oxidoreductase activity (By similarity). Protects dopaminergic neurons against oxidative stress ans cell death (PubMed:26866473). Involved in ADCYAP1/PACAP-induced calcium mobilization and neuroendocrine secretion (By similarity). Plays a role in fibroblast anchorage and redox regulation (PubMed:19935881). In gastric smooth muscle, modulates…	sp|P62342|SELT_MOUSE	sp|P62342|SELT_MOUSE Thioredoxin reductase-like selenoprotein T OS=Mus musculus OX=10090 GN=Selenot PE=1 SV=2	1	4	4	4	28.7	22.292	30496000	44144000	42470000	41633000	41382000	44060000	22166000	35067000	34238000	36219000	38808000	44460000		Quantified
P62627	Dynein light chain roadblock-type 1	Dynlrb1	FUNCTION: Acts as one of several non-catalytic accessory components of the cytoplasmic dynein 1 complex that are thought to be involved in linking dynein to cargos and to adapter proteins that regulate dynein function. Cytoplasmic dynein 1 acts as a motor for the intracellular retrograde motility of vesicles and organelles along microtubules.	sp|P62627|DLRB1_MOUSE	sp|P62627|DLRB1_MOUSE Dynein light chain roadblock-type 1 OS=Mus musculus OX=10090 GN=Dynlrb1 PE=1 SV=3	1	5	5	5	49	10.99		55834000	67491000	102180000		48064000		56381000	119100000	67269000	47761000			Quantified
P62631	Elongation factor 1-alpha 2	Eef1a2	FUNCTION: This protein promotes the GTP-dependent binding of aminoacyl-tRNA to the A-site of ribosomes during protein biosynthesis.	sp|P62631|EF1A2_MOUSE	sp|P62631|EF1A2_MOUSE Elongation factor 1-alpha 2 OS=Mus musculus OX=10090 GN=Eef1a2 PE=1 SV=1	1	23	23	14	65.2	50.454	22797000000	21900000000	22723000000	23663000000	22216000000	20530000000	16786000000	24703000000	32995000000	32096000000	28262000000	23645000000		Quantified
P62702	40S ribosomal protein S4, X isoform	Rps4x		sp|P62702|RS4X_MOUSE	sp|P62702|RS4X_MOUSE 40S ribosomal protein S4, X isoform OS=Mus musculus OX=10090 GN=Rps4x PE=1 SV=2	1	14	14	14	50.2	29.597	5511800000	5555500000	5281000000	6986100000	5957000000	6556000000	6120200000	5739000000	5632400000	5094000000	5683700000	6589000000		Quantified
P62717	60S ribosomal protein L18a	Rpl18a		sp|P62717|RL18A_MOUSE	sp|P62717|RL18A_MOUSE 60S ribosomal protein L18a OS=Mus musculus OX=10090 GN=Rpl18a PE=1 SV=1	1	7	7	7	35.2	20.732	1055500000	1068800000	1325200000	1728600000	1363500000	1118200000	1222100000	1096000000	793530000	1388100000	639830000	1511000000		Quantified
P62737	Actin, aortic smooth muscle	Acta2	FUNCTION: Actins are highly conserved proteins that are involved in various types of cell motility and are ubiquitously expressed in all eukaryotic cells.	sp|P62737|ACTA_MOUSE;sp|P63268|ACTH_MOUSE	sp|P62737|ACTA_MOUSE Actin, aortic smooth muscle OS=Mus musculus OX=10090 GN=Acta2 PE=1 SV=1;sp|P63268|ACTH_MOUSE Actin, gamma-enteric smooth muscle OS=Mus musculus OX=10090 GN=Actg2 PE=1 SV=1	2	25	1	1	72.4	42.009	1384000000	1884200000	1837400000	1707600000	1129900000	1002300000	1069000000	774160000	2340000000	2143400000	2283600000	3053300000		Quantified
P62743	AP-2 complex subunit sigma	Ap2s1	FUNCTION: Component of the adaptor protein complex 2 (AP-2). Adaptor protein complexes function in protein transport via Transport vesicles in different membrane traffic pathways. Adaptor protein complexes are vesicle coat components and appear to be involved in cargo selection and vesicle formation. AP-2 is involved in clathrin-dependent endocytosis in which cargo proteins are incorporated into …	sp|P62743|AP2S1_MOUSE	sp|P62743|AP2S1_MOUSE AP-2 complex subunit sigma OS=Mus musculus OX=10090 GN=Ap2s1 PE=1 SV=1	1	4	4	4	26.1	17.018	44517000	27580000	45550000	61160000		43533000	53520000	44853000	53484000	49392000	31555000	59471000		Quantified
P62746	Rho-related GTP-binding protein RhoB	Rhob	FUNCTION: Mediates apoptosis in neoplastically transformed cells after DNA damage. Not essential for development but affects cell adhesion and growth factor signaling in transformed cells. Plays a negative role in tumorigenesis as deletion causes tumor formation. Involved in intracellular protein trafficking of a number of proteins. Targets PKN1 to endosomes and is involved in trafficking of the …	sp|P62746|RHOB_MOUSE	sp|P62746|RHOB_MOUSE Rho-related GTP-binding protein RhoB OS=Mus musculus OX=10090 GN=Rhob PE=1 SV=1	1	5	4	4	39.8	22.123	8403800			9304200										Identified
P62751	60S ribosomal protein L23a	Rpl23a	FUNCTION: Component of the ribosome, a large ribonucleoprotein complex responsible for the synthesis of proteins in the cell. Binds a specific region on the 26S rRNA (By similarity). May promote p53/TP53 degradation possibly through the stimulation of MDM2-mediated TP53 polyubiquitination (By similarity). {ECO:0000250, ECO:0000250|UniProtKB:P62750}.	sp|P62751|RL23A_MOUSE	sp|P62751|RL23A_MOUSE 60S ribosomal protein L23a OS=Mus musculus OX=10090 GN=Rpl23a PE=1 SV=1	1	8	8	8	42.3	17.695	1995000000	2257000000	1363300000	1824500000	1787600000	1835400000	1903600000	1955300000	1610900000	1765600000	1659600000	1884200000		Quantified
P62754	40S ribosomal protein S6	Rps6	FUNCTION: May play an important role in controlling cell growth and proliferation through the selective translation of particular classes of mRNA.	sp|P62754|RS6_MOUSE	sp|P62754|RS6_MOUSE 40S ribosomal protein S6 OS=Mus musculus OX=10090 GN=Rps6 PE=1 SV=1	1	7	7	7	29.7	28.68	1414700000	1239700000	1034700000	1288600000	1292800000	1143200000	1049500000	1149400000	1202800000	1332200000	986520000	909770000		Quantified
P62806	Histone H4	H4c1	FUNCTION: Core component of nucleosome. Nucleosomes wrap and compact DNA into chromatin, limiting DNA accessibility to the cellular machineries which require DNA as a template. Histones thereby play a central role in transcription regulation, DNA repair, DNA replication and chromosomal stability. DNA accessibility is regulated via a complex set of post-translational modifications of histones, als…	sp|P62806|H4_MOUSE	sp|P62806|H4_MOUSE Histone H4 OS=Mus musculus OX=10090 GN=H4c1 PE=1 SV=2	1	7	7	7	52.4	11.367	10073000000	12065000000	5299200000	10205000000	6629800000	6145600000	16849000000	9387900000	6401700000	5736300000	6276500000	8195100000		Quantified
P62814	V-type proton ATPase subunit B, brain isoform	Atp6v1b2	FUNCTION: Non-catalytic subunit of the peripheral V1 complex of vacuolar ATPase. V-ATPase is responsible for acidifying a variety of intracellular compartments in eukaryotic cells.	sp|P62814|VATB2_MOUSE	sp|P62814|VATB2_MOUSE V-type proton ATPase subunit B, brain isoform OS=Mus musculus OX=10090 GN=Atp6v1b2 PE=1 SV=1	1	6	6	6	16.8	56.55	186870000	190790000	122640000	160630000	194660000	110580000	134670000	195820000	189210000	169500000	182640000	227910000		Quantified
P62821	Ras-related protein Rab-1A	Rab1A	FUNCTION: The small GTPases Rab are key regulators of intracellular membrane trafficking, from the formation of transport vesicles to their fusion with membranes. Rabs cycle between an inactive GDP-bound form and an active GTP-bound form that is able to recruit to membranes different sets of downstream effectors directly responsible for vesicle formation, movement, tethering and fusion. RAB1A reg…	sp|P62821|RAB1A_MOUSE;sp|Q8K386|RAB15_MOUSE	sp|P62821|RAB1A_MOUSE Ras-related protein Rab-1A OS=Mus musculus OX=10090 GN=Rab1A PE=1 SV=3	2	12	12	7	68.3	22.677	4163300000	4344800000	4197500000	4077800000	4105000000	4828100000	3418700000	4047600000	4206800000	3708900000	3747300000	4147000000		Quantified
P62827	GTP-binding nuclear protein Ran	Ran	FUNCTION: GTPase involved in nucleocytoplasmic transport, participating both to the import and the export from the nucleus of proteins and RNAs. Switches between a cytoplasmic GDP- and a nuclear GTP-bound state by nucleotide exchange and GTP hydrolysis. Nuclear import receptors such as importin beta bind their substrates only in the absence of GTP-bound RAN and release them upon direct interactio…	sp|P62827|RAN_MOUSE;sp|Q61820|RANT_MOUSE	sp|P62827|RAN_MOUSE GTP-binding nuclear protein Ran OS=Mus musculus OX=10090 GN=Ran PE=1 SV=3;sp|Q61820|RANT_MOUSE GTP-binding nuclear protein Ran, testis-specific isoform OS=Mus musculus OX=10090 GN=Rasl2-9 PE=2 SV=1	2	8	8	8	44.4	24.423	1539000000	1139100000	1352100000	1564300000	1639200000	1493100000	1155100000	1559400000	1797600000	1878100000	2117000000	1355900000		Quantified
P62830	60S ribosomal protein L23	Rpl23		sp|P62830|RL23_MOUSE	sp|P62830|RL23_MOUSE 60S ribosomal protein L23 OS=Mus musculus OX=10090 GN=Rpl23 PE=1 SV=1	1	6	6	6	56.4	14.865	1613500000	1435900000	1512900000	1456900000	1263900000	1704100000	1362500000	1722900000	1102200000	1374500000	1273100000	1331900000		Quantified
P62835	Ras-related protein Rap-1A	Rap1a	FUNCTION: Induces morphological reversion of a cell line transformed by a Ras oncogene. Counteracts the mitogenic function of Ras, at least partly because it can interact with Ras GAPs and RAF in a competitive manner. Together with ITGB1BP1, regulates KRIT1 localization to microtubules and membranes (By similarity). Plays a role in nerve growth factor (NGF)-induced neurite outgrowth. Plays a role…	sp|P62835|RAP1A_MOUSE	sp|P62835|RAP1A_MOUSE Ras-related protein Rap-1A OS=Mus musculus OX=10090 GN=Rap1a PE=1 SV=1	1	9	3	3	49.5	20.987	144040000	112410000	96449000	127160000	153520000	164200000	131950000	152370000	103190000	80968000	101920000	115500000		Quantified
P62843	40S ribosomal protein S15	Rps15		sp|P62843|RS15_MOUSE	sp|P62843|RS15_MOUSE 40S ribosomal protein S15 OS=Mus musculus OX=10090 GN=Rps15 PE=1 SV=2	1	3	3	3	28.3	17.04	430620000	247720000	429400000	645350000	486380000	521580000	391930000	194950000	296880000	610730000	359970000	403140000		Quantified
P62849	40S ribosomal protein S24	Rps24	FUNCTION: Required for processing of pre-rRNA and maturation of 40S ribosomal subunits. {ECO:0000250}.	sp|P62849|RS24_MOUSE	sp|P62849|RS24_MOUSE 40S ribosomal protein S24 OS=Mus musculus OX=10090 GN=Rps24 PE=1 SV=1	1	4	4	4	34.6	15.423	936850000	929920000	686490000	822360000	834140000	1234300000	1413800000	993380000	681560000	1126200000	1270600000	857900000		Quantified
P62852	40S ribosomal protein S25	Rps25		sp|P62852|RS25_MOUSE	sp|P62852|RS25_MOUSE 40S ribosomal protein S25 OS=Mus musculus OX=10090 GN=Rps25 PE=1 SV=1	1	3	3	3	22.4	13.742	133660000	118800000	83231000	111460000	107860000	105500000	169440000	97755000	95645000	111190000	79262000	126550000		Quantified
P62855	40S ribosomal protein S26	Rps26		sp|P62855|RS26_MOUSE	sp|P62855|RS26_MOUSE 40S ribosomal protein S26 OS=Mus musculus OX=10090 GN=Rps26 PE=1 SV=3	1	3	3	3	27	13.015	850710000	582290000	417870000	418050000	304030000	500190000	371600000	416210000	495770000	283480000	265600000	500560000		Quantified
P62858	40S ribosomal protein S28	Rps28		sp|P62858|RS28_MOUSE	sp|P62858|RS28_MOUSE 40S ribosomal protein S28 OS=Mus musculus OX=10090 GN=Rps28 PE=1 SV=1	1	3	3	3	46.4	7.8409	441670000	451390000	552470000	431060000	497610000	508330000	325720000	434770000	468840000	447810000	444150000	461840000		Quantified
P62862	40S ribosomal protein S30	Fau		sp|P62862|RS30_MOUSE	sp|P62862|RS30_MOUSE 40S ribosomal protein S30 OS=Mus musculus OX=10090 GN=Fau PE=1 SV=1	1	1	1	1	16.9	6.6478	775880000	1414400000	506690000	352180000	1167100000	667620000	716320000	1417900000	539650000	848160000	335150000	314560000		Quantified
P62869	Elongin-B	Elob	FUNCTION: SIII, also known as elongin, is a general transcription elongation factor that increases the RNA polymerase II transcription elongation past template-encoded arresting sites. Subunit A is transcriptionally active and its transcription activity is strongly enhanced by binding to the dimeric complex of the SIII regulatory subunits B and C (elongin BC complex) (By similarity). In embryonic…	sp|P62869|ELOB_MOUSE	sp|P62869|ELOB_MOUSE Elongin-B OS=Mus musculus OX=10090 GN=Elob PE=1 SV=1	1	2	2	2	21.2	13.17	38276000	22050000		20441000	23642000	20919000		20614000	26847000	23393000	56286000	26893000		Quantified
P62874	Guanine nucleotide-binding protein G(I)/G(S)/G(T) subunit beta-1	Gnb1	FUNCTION: Guanine nucleotide-binding proteins (G proteins) are involved as a modulator or transducer in various transmembrane signaling systems. The beta and gamma chains are required for the GTPase activity, for replacement of GDP by GTP, and for G protein-effector interaction (By similarity). {ECO:0000250}.	sp|P62874|GBB1_MOUSE	sp|P62874|GBB1_MOUSE Guanine nucleotide-binding protein G(I)/G(S)/G(T) subunit beta-1 OS=Mus musculus OX=10090 GN=Gnb1 PE=1 SV=3	1	11	5	5	41.5	37.377	65780000	52385000	42126000	57635000	63837000	61880000	77002000	71301000	52151000	58256000	56169000	45885000		Quantified
P62878	E3 ubiquitin-protein ligase RBX1	Rbx1	FUNCTION: E3 ubiquitin ligase component of multiple cullin-RING-based E3 ubiquitin-protein ligase (CRLs) complexes which mediate the ubiquitination and subsequent proteasomal degradation of target proteins, including proteins involved in cell cycle progression, signal transduction, transcription and transcription-coupled nucleotide excision repair (PubMed:22118460). CRLs complexes and ARIH1 colla…	sp|P62878|RBX1_MOUSE	sp|P62878|RBX1_MOUSE E3 ubiquitin-protein ligase RBX1 OS=Mus musculus OX=10090 GN=Rbx1 PE=1 SV=1	1	2	2	2	24.1	12.274		46191000		52112000		37320000		30278000	65790000	39965000	54607000	84221000		Quantified
P62880	Guanine nucleotide-binding protein G(I)/G(S)/G(T) subunit beta-2	Gnb2	FUNCTION: Guanine nucleotide-binding proteins (G proteins) are involved as a modulator or transducer in various transmembrane signaling systems. The beta and gamma chains are required for the GTPase activity, for replacement of GDP by GTP, and for G protein-effector interaction.	sp|P62880|GBB2_MOUSE;sp|P29387|GBB4_MOUSE;sp|Q61011|GBB3_MOUSE	sp|P62880|GBB2_MOUSE Guanine nucleotide-binding protein G(I)/G(S)/G(T) subunit beta-2 OS=Mus musculus OX=10090 GN=Gnb2 PE=1 SV=3	3	12	12	6	43.5	37.331	898900000	735720000	802360000	869180000	866390000	865590000	784300000	854690000	715940000	696410000	656950000	730360000		Quantified
P62889	60S ribosomal protein L30	Rpl30		sp|P62889|RL30_MOUSE	sp|P62889|RL30_MOUSE 60S ribosomal protein L30 OS=Mus musculus OX=10090 GN=Rpl30 PE=1 SV=2	1	7	7	7	66.1	12.784	1027300000	713670000	582810000	1038800000	1043700000	730430000	975770000	1007000000	877440000	625280000	894710000	1211800000		Quantified
P62897	Cytochrome c, somatic	Cycs	FUNCTION: Electron carrier protein. The oxidized form of the cytochrome c heme group can accept an electron from the heme group of the cytochrome c1 subunit of cytochrome reductase. Cytochrome c then transfers this electron to the cytochrome oxidase complex, the final protein carrier in the mitochondrial electron-transport chain. {ECO:0000269|PubMed:12062423}.; FUNCTION: Plays a role in apoptosis…	sp|P62897|CYC_MOUSE;CON__P62894	sp|P62897|CYC_MOUSE Cytochrome c, somatic OS=Mus musculus OX=10090 GN=Cycs PE=1 SV=2	2	3	3	3	31.4	11.605	81028000	36274000	35746000	39247000	31083000	22305000	48799000	24098000	83652000	36482000	30407000	36294000		Quantified
P62900	60S ribosomal protein L31	Rpl31		sp|P62900|RL31_MOUSE	sp|P62900|RL31_MOUSE 60S ribosomal protein L31 OS=Mus musculus OX=10090 GN=Rpl31 PE=1 SV=1	1	5	5	5	39.2	14.463	913890000	1055400000	1021200000	1446600000	1228500000	1571800000	845580000	1243400000	873490000	1554800000	934560000	1073400000		Quantified
P62908	40S ribosomal protein S3	Rps3	FUNCTION: Involved in translation as a component of the 40S small ribosomal subunit (By similarity). Has endonuclease activity and plays a role in repair of damaged DNA (PubMed:7775413). Cleaves phosphodiester bonds of DNAs containing altered bases with broad specificity and cleaves supercoiled DNA more efficiently than relaxed DNA (By similarity). Displays high binding affinity for 7,8-dihydro-8…	sp|P62908|RS3_MOUSE	sp|P62908|RS3_MOUSE 40S ribosomal protein S3 OS=Mus musculus OX=10090 GN=Rps3 PE=1 SV=1	1	17	17	17	77	26.674	4094400000	3488200000	4458400000	4208500000	4187100000	4231600000	3365200000	3994300000	3666600000	3728900000	3592100000	4410700000		Quantified
P62911	60S ribosomal protein L32	Rpl32		sp|P62911|RL32_MOUSE	sp|P62911|RL32_MOUSE 60S ribosomal protein L32 OS=Mus musculus OX=10090 GN=Rpl32 PE=1 SV=2	1	4	4	4	28.1	15.86	511280000	531730000	484830000	620400000	554720000	604780000	417110000	360470000	383310000	515270000	369590000	673190000		Quantified
P62918	60S ribosomal protein L8	Rpl8	FUNCTION: Component of the large ribosomal subunit. {ECO:0000250|UniProtKB:P62917}.	sp|P62918|RL8_MOUSE	sp|P62918|RL8_MOUSE 60S ribosomal protein L8 OS=Mus musculus OX=10090 GN=Rpl8 PE=1 SV=2	1	8	8	8	46.7	28.024	1674700000	1291100000	1265100000	2494700000	2670000000	2715800000	1333400000	1956200000	1536100000	2405200000	2726900000	1397100000		Quantified
P62932	F-box only protein 40	Fbxo40	FUNCTION: Probable substrate-recognition component of the SCF (SKP1-CUL1-F-box protein)-type E3 ubiquitin ligase complex that may function in myogenesis. {ECO:0000269|PubMed:17928169}.	sp|P62932|FBX40_MOUSE	sp|P62932|FBX40_MOUSE F-box only protein 40 OS=Mus musculus OX=10090 GN=Fbxo40 PE=1 SV=1	1	13	13	13	23.5	79.95	124080000	104110000	119970000	91534000	115050000	96640000	78836000	136580000	106830000	140500000	117840000	101680000		Quantified
P62960	Y-box-binding protein 1	Ybx1	FUNCTION: DNA- and RNA-binding protein involved in various processes, such as translational repression, RNA stabilization, mRNA splicing, DNA repair and transcription regulation (PubMed:8505341, PubMed:29712925). Predominantly acts as a RNA-binding protein: binds preferentially to the 5'-[CU]CUGCG-3' RNA motif and specifically recognizes mRNA transcripts modified by C5-methylcytosine (m5C) (By si…	sp|P62960|YBOX1_MOUSE;sp|Q9Z2C8|YBOX2_MOUSE;sp|Q9JKB3|YBOX3_MOUSE	sp|P62960|YBOX1_MOUSE Y-box-binding protein 1 OS=Mus musculus OX=10090 GN=Ybx1 PE=1 SV=3	3	3	3	3	14	35.73	63904000	39635000	30595000	58231000	52777000	35598000		54403000	62920000	45650000	47097000	32712000		Quantified
P62983	Ubiquitin-40S ribosomal protein S27a	Rps27a	FUNCTION: [Ubiquitin]: Exists either covalently attached to another protein, or free (unanchored). When covalently bound, it is conjugated to target proteins via an isopeptide bond either as a monomer (monoubiquitin), a polymer linked via different Lys residues of the ubiquitin (polyubiquitin chains) or a linear polymer linked via the initiator Met of the ubiquitin (linear polyubiquitin chains). …	sp|P62983|RS27A_MOUSE;sp|P62984|RL40_MOUSE;sp|P0CG49|UBB_MOUSE;sp|P0CG50|UBC_MOUSE	sp|P62983|RS27A_MOUSE Ubiquitin-40S ribosomal protein S27a OS=Mus musculus OX=10090 GN=Rps27a PE=1 SV=2;sp|P62984|RL40_MOUSE Ubiquitin-60S ribosomal protein L40 OS=Mus musculus OX=10090 GN=Uba52 PE=1 SV=2;sp|P0CG49|UBB_MOUSE Polyubiquitin-B OS=Mus musculus	4	6	6	6	42.9	17.951	1672300000	1242000000	1662400000	1217900000	1337100000	1322300000	1703100000	1431200000	1393100000	1621800000	1862700000	1228900000		Quantified
P62996	Transformer-2 protein homolog beta	Tra2b	FUNCTION: Sequence-specific RNA-binding protein which participates in the control of pre-mRNA splicing. Can either activate or suppress exon inclusion. Acts additively with RBMX to promote exon 7 inclusion of the survival motor neuron SMN2. Activates the splicing of MAPT/Tau exon 10. Alters pre-mRNA splicing patterns by antagonizing the effects of splicing regulators, like RBMX. Binds to the AG-r…	sp|P62996|TRA2B_MOUSE	sp|P62996|TRA2B_MOUSE Transformer-2 protein homolog beta OS=Mus musculus OX=10090 GN=Tra2b PE=1 SV=1	1	2	2	1	8.7	33.665	23845000		25342000	30875000	33904000	32087000	26125000			19045000	27920000			Quantified
P63001	Ras-related C3 botulinum toxin substrate 1	Rac1	FUNCTION: Plasma membrane-associated small GTPase which cycles between active GTP-bound and inactive GDP-bound states (PubMed:24352656). In its active state, binds to a variety of effector proteins to regulate cellular responses such as secretory processes, phagocytosis of apoptotic cells, epithelial cell polarization, neurons adhesion, migration and differentiation, and growth-factor induced for…	sp|P63001|RAC1_MOUSE;sp|P60764|RAC3_MOUSE;sp|Q05144|RAC2_MOUSE	sp|P63001|RAC1_MOUSE Ras-related C3 botulinum toxin substrate 1 OS=Mus musculus OX=10090 GN=Rac1 PE=1 SV=1;sp|P60764|RAC3_MOUSE Ras-related C3 botulinum toxin substrate 3 OS=Mus musculus OX=10090 GN=Rac3 PE=1 SV=1;sp|Q05144|RAC2_MOUSE Ras-related C3 botuli	3	7	6	6	43.2	21.45	278690000	291490000	256770000	297040000	329510000	274480000	332740000	269010000	329510000	320260000	332620000	295270000		Quantified
P63005	Platelet-activating factor acetylhydrolase IB subunit beta	Pafah1b1	FUNCTION: Positively regulates the activity of the minus-end directed microtubule motor protein dynein. May enhance dynein-mediated microtubule sliding by targeting dynein to the microtubule plus end. Required for several dynein- and microtubule-dependent processes such as the maintenance of Golgi integrity, the peripheral transport of microtubule fragments and the coupling of the nucleus and cen…	sp|P63005|LIS1_MOUSE	sp|P63005|LIS1_MOUSE Platelet-activating factor acetylhydrolase IB subunit beta OS=Mus musculus OX=10090 GN=Pafah1b1 PE=1 SV=2	1	3	3	3	10.5	46.67	21993000	30064000	17679000		26986000		26494000	20026000		14526000	26213000			Quantified
P63011	Ras-related protein Rab-3A	Rab3a	FUNCTION: Small GTP-binding protein that plays a central role in regulated exocytosis and secretion. Controls the recruitment, tethering and docking of secretory vesicles to the plasma membrane (PubMed:11598194). Upon stimulation, switches to its active GTP-bound form, cycles to vesicles and recruits effectors such as RIMS1, RIMS2, Rabphilin-3A/RPH3A, RPH3AL or SYTL4 to help the docking of vesicu…	sp|P63011|RAB3A_MOUSE;sp|Q9CZT8|RAB3B_MOUSE;sp|P62823|RAB3C_MOUSE	sp|P63011|RAB3A_MOUSE Ras-related protein Rab-3A OS=Mus musculus OX=10090 GN=Rab3a PE=1 SV=1	3	6	5	4	39.1	24.97	446630000	383230000	492120000	359300000	431670000	523830000	371960000	470160000	397770000	507070000	368470000	414570000		Quantified
P63017	Heat shock cognate 71 kDa protein	Hspa8	FUNCTION: Molecular chaperone implicated in a wide variety of cellular processes, including protection of the proteome from stress, folding and transport of newly synthesized polypeptides, activation of proteolysis of misfolded proteins and the formation and dissociation of protein complexes. Plays a pivotal role in the protein quality control system, ensuring the correct folding of proteins, the…	sp|P63017|HSP7C_MOUSE	sp|P63017|HSP7C_MOUSE Heat shock cognate 71 kDa protein OS=Mus musculus OX=10090 GN=Hspa8 PE=1 SV=1	1	30	30	20	63.3	70.87	6207300000	6495600000	6249500000	8886500000	6804700000	7165900000	6305900000	6519000000	6250200000	6943300000	6492400000	5329900000		Quantified
P63024	Vesicle-associated membrane protein 3	Vamp3	FUNCTION: SNARE involved in vesicular transport from the late endosomes to the trans-Golgi network. {ECO:0000250}.	sp|P63024|VAMP3_MOUSE;sp|P63044|VAMP2_MOUSE	sp|P63024|VAMP3_MOUSE Vesicle-associated membrane protein 3 OS=Mus musculus OX=10090 GN=Vamp3 PE=1 SV=1;sp|P63044|VAMP2_MOUSE Vesicle-associated membrane protein 2 OS=Mus musculus OX=10090 GN=Vamp2 PE=1 SV=2	2	1	1	1	16.5	11.48								16389000						Identified
P63028	Translationally-controlled tumor protein	Tpt1	FUNCTION: Involved in calcium binding and microtubule stabilization. {ECO:0000250}.	sp|P63028|TCTP_MOUSE	sp|P63028|TCTP_MOUSE Translationally-controlled tumor protein OS=Mus musculus OX=10090 GN=Tpt1 PE=1 SV=1	1	1	1	1	8.1	19.462	20652000	28563000	20083000	15136000	22766000	19130000	19312000	16624000	24262000	20974000				Quantified
P63030	Mitochondrial pyruvate carrier 1	Mpc1	FUNCTION: Mediates the uptake of pyruvate into mitochondria. {ECO:0000269|PubMed:22628554}.	sp|P63030|MPC1_MOUSE	sp|P63030|MPC1_MOUSE Mitochondrial pyruvate carrier 1 OS=Mus musculus OX=10090 GN=Mpc1 PE=1 SV=1	1	4	4	4	39.4	12.454	4017600000	5145900000	4919300000	5757500000	5020900000	4836900000	3670500000	4407100000	3992800000	4225200000	3616100000	4812600000		Quantified
P63037	DnaJ homolog subfamily A member 1	Dnaja1	FUNCTION: Co-chaperone for HSPA8/Hsc70. Plays a role in protein transport into mitochondria via its role as co-chaperone. Stimulates ATP hydrolysis, but not the folding of unfolded proteins mediated by HSPA1A (in vitro). Promotes apoptosis in response to cellular stress mediated by exposure to anisomycin or UV (By similarity). Functions as co-chaperone for HSPA1B and negatively regulates the tran…	sp|P63037|DNJA1_MOUSE	sp|P63037|DNJA1_MOUSE DnaJ homolog subfamily A member 1 OS=Mus musculus OX=10090 GN=Dnaja1 PE=1 SV=1	1	1	1	1	3.3	44.868			33509000				29399000	51381000		60320000	68728000	32346000		Quantified
P63038	60 kDa heat shock protein, mitochondrial	Hspd1	FUNCTION: Chaperonin implicated in mitochondrial protein import and macromolecular assembly. Together with Hsp10, facilitates the correct folding of imported proteins. May also prevent misfolding and promote the refolding and proper assembly of unfolded polypeptides generated under stress conditions in the mitochondrial matrix. The functional units of these chaperonins consist of heptameric rings…	sp|P63038|CH60_MOUSE	sp|P63038|CH60_MOUSE 60 kDa heat shock protein, mitochondrial OS=Mus musculus OX=10090 GN=Hspd1 PE=1 SV=1	1	32	32	32	72.3	60.955	10263000000	10899000000	12068000000	11604000000	12438000000	11261000000	7935700000	10596000000	13762000000	12296000000	13233000000	10859000000		Quantified
P63085	Mitogen-activated protein kinase 1	Mapk1	FUNCTION: Serine/threonine kinase which acts as an essential component of the MAP kinase signal transduction pathway. MAPK1/ERK2 and MAPK3/ERK1 are the 2 MAPKs which play an important role in the MAPK/ERK cascade. They participate also in a signaling cascade initiated by activated KIT and KITLG/SCF. Depending on the cellular context, the MAPK/ERK cascade mediates diverse biological functions such…	sp|P63085|MK01_MOUSE	sp|P63085|MK01_MOUSE Mitogen-activated protein kinase 1 OS=Mus musculus OX=10090 GN=Mapk1 PE=1 SV=3	1	5	5	4	15.9	41.275	34331000	25227000	28631000				17701000			20120000	14014000	31060000		Quantified
P63087	Serine/threonine-protein phosphatase PP1-gamma catalytic subunit	Ppp1cc	FUNCTION: Protein phosphatase that associates with over 200 regulatory proteins to form highly specific holoenzymes which dephosphorylate hundreds of biological targets. Protein phosphatase 1 (PP1) is essential for cell division, and participates in the regulation of glycogen metabolism, muscle contractility and protein synthesis. Dephosphorylates RPS6KB1. Involved in regulation of ionic conducta…	sp|P63087|PP1G_MOUSE	sp|P63087|PP1G_MOUSE Serine/threonine-protein phosphatase PP1-gamma catalytic subunit OS=Mus musculus OX=10090 GN=Ppp1cc PE=1 SV=1	1	11	1	1	43.7	36.983							23837000							Identified
Q6R0H7	Guanine nucleotide-binding protein G(s) subunit alpha isoforms XLas	Gnas	FUNCTION: Guanine nucleotide-binding proteins (G proteins) function as transducers in numerous signaling pathways controlled by G protein-coupled receptors (GPCRs). Signaling involves the activation of adenylyl cyclases, resulting in increased levels of the signaling molecule cAMP. GNAS functions downstream of several GPCRs, including beta-adrenergic receptors. XLas isoforms interact with the sam…	sp|Q6R0H7|GNAS1_MOUSE;sp|P63094|GNAS2_MOUSE;sp|Q8CGK7|GNAL_MOUSE	sp|Q6R0H7|GNAS1_MOUSE Guanine nucleotide-binding protein G(s) subunit alpha isoforms XLas OS=Mus musculus OX=10090 GN=Gnas PE=1 SV=1;sp|P63094|GNAS2_MOUSE Guanine nucleotide-binding protein G(s) subunit alpha isoforms short OS=Mus musculus OX=10090 GN=Gnas	3	10	9	9	13.1	121.5	379020000	383170000	397930000	506050000	430740000	318190000	280860000	456250000	434390000	300260000	359460000	362290000		Quantified
P63101	14-3-3 protein zeta/delta	Ywhaz	FUNCTION: Adapter protein implicated in the regulation of a large spectrum of both general and specialized signaling pathways. Binds to a large number of partners, usually by recognition of a phosphoserine or phosphothreonine motif. Binding generally results in the modulation of the activity of the binding partner. Induces ARHGEF7 activity on RAC1 as well as lamellipodia and membrane ruffle forma…	sp|P63101|1433Z_MOUSE	sp|P63101|1433Z_MOUSE 14-3-3 protein zeta/delta OS=Mus musculus OX=10090 GN=Ywhaz PE=1 SV=1	1	6	3	3	26.1	27.771	33831000						37867000	45177000	55700000	51537000		44742000		Quantified
P63242	Eukaryotic translation initiation factor 5A-1	Eif5a	FUNCTION: mRNA-binding protein involved in translation elongation. Has an important function at the level of mRNA turnover, probably acting downstream of decapping. Involved in actin dynamics and cell cycle progression, mRNA decay and probably in a pathway involved in stress response and maintenance of cell wall integrity. With syntenin SDCBP, functions as a regulator of p53/TP53 and p53/TP53-dep…	sp|P63242|IF5A1_MOUSE;sp|Q8BGY2|IF5A2_MOUSE	sp|P63242|IF5A1_MOUSE Eukaryotic translation initiation factor 5A-1 OS=Mus musculus OX=10090 GN=Eif5a PE=1 SV=2;sp|Q8BGY2|IF5A2_MOUSE Eukaryotic translation initiation factor 5A-2 OS=Mus musculus OX=10090 GN=Eif5a2 PE=1 SV=3	2	4	4	4	50	16.832	41170000	97112000	146540000	67381000	94890000	136420000	42573000	132870000	153010000	165620000	178010000	93330000		Quantified
P63260	Actin, cytoplasmic 2	Actg1	FUNCTION: Actins are highly conserved proteins that are involved in various types of cell motility and are ubiquitously expressed in all eukaryotic cells. {ECO:0000250|UniProtKB:P63261}.	sp|P63260|ACTG_MOUSE	sp|P63260|ACTG_MOUSE Actin, cytoplasmic 2 OS=Mus musculus OX=10090 GN=Actg1 PE=1 SV=1	1	23	10	1	76	41.792	47510000000	55935000000	40789000000	30804000000	41552000000	41363000000	66739000000	45237000000	62414000000	51423000000	53030000000	54651000000		Quantified
P63276	40S ribosomal protein S17	Rps17		sp|P63276|RS17_MOUSE	sp|P63276|RS17_MOUSE 40S ribosomal protein S17 OS=Mus musculus OX=10090 GN=Rps17 PE=1 SV=2	1	4	4	4	38.5	15.524	419460000	238380000	250110000	364730000	236340000	409310000	482810000	331220000	196750000	244860000	309910000	300680000		Quantified
P63321	Ras-related protein Ral-A	Rala	FUNCTION: Multifunctional GTPase involved in a variety of cellular processes including gene expression, cell migration, cell proliferation, oncogenic transformation and membrane trafficking. Accomplishes its multiple functions by interacting with distinct downstream effectors. Acts as a GTP sensor for GTP-dependent exocytosis of dense core vesicles. Key regulator of LPAR1 signaling and competes w…	sp|P63321|RALA_MOUSE	sp|P63321|RALA_MOUSE Ras-related protein Ral-A OS=Mus musculus OX=10090 GN=Rala PE=1 SV=1	1	5	5	3	26.7	23.553	152560000	163460000	145090000	151610000	156270000	207110000	245630000	180790000	161380000	99336000	257670000	178600000		Quantified
P63323	40S ribosomal protein S12	Rps12		sp|P63323|RS12_MOUSE	sp|P63323|RS12_MOUSE 40S ribosomal protein S12 OS=Mus musculus OX=10090 GN=Rps12 PE=1 SV=2	1	5	5	5	41.7	14.525	779020000	699260000	673190000	896210000	732630000	995330000	880180000	763940000	869860000	633310000	853480000	1235900000		Quantified
P63325	40S ribosomal protein S10	Rps10	FUNCTION: Component of the 40S ribosomal subunit. {ECO:0000250}.	sp|P63325|RS10_MOUSE	sp|P63325|RS10_MOUSE 40S ribosomal protein S10 OS=Mus musculus OX=10090 GN=Rps10 PE=1 SV=1	1	6	6	6	37.6	18.916	1471900000	1045000000	1100500000	1161000000	1206800000	1316900000	1380400000	1470200000	932150000	1339500000	1294800000	1087000000		Quantified
P63328	Serine/threonine-protein phosphatase 2B catalytic subunit alpha isoform	Ppp3ca	FUNCTION: Calcium-dependent, calmodulin-stimulated protein phosphatase which plays an essential role in the transduction of intracellular Ca(2+)-mediated signals (PubMed:7791792, PubMed:26794871). Many of the substrates contain a PxIxIT motif and/or a LxVP motif (By similarity). In response to increased Ca(2+) levels, dephosphorylates and activates phosphatase SSH1 which results in cofilin dephos…	sp|P63328|PP2BA_MOUSE;sp|P48453|PP2BB_MOUSE;sp|P48455|PP2BC_MOUSE	sp|P63328|PP2BA_MOUSE Serine/threonine-protein phosphatase 2B catalytic subunit alpha isoform OS=Mus musculus OX=10090 GN=Ppp3ca PE=1 SV=1;sp|P48453|PP2BB_MOUSE Serine/threonine-protein phosphatase 2B catalytic subunit beta isoform OS=Mus musculus OX=10090	3	4	4	4	7.9	58.643	58003000	64535000	60333000	87225000	67927000	75678000	55110000	76649000	63603000	71386000	52735000	102870000		Quantified
P63330	Serine/threonine-protein phosphatase 2A catalytic subunit alpha isoform	Ppp2ca	FUNCTION: PP2A is the major phosphatase for microtubule-associated proteins (MAPs). PP2A can modulate the activity of phosphorylase B kinase casein kinase 2, mitogen-stimulated S6 kinase, and MAP-2 kinase. Cooperates with SGO2 to protect centromeric cohesin from separase-mediated cleavage in oocytes specifically during meiosis I. Activates RAF1 by dephosphorylating it at 'Ser-259' (By similarity)…	sp|P63330|PP2AA_MOUSE;sp|P62715|PP2AB_MOUSE;sp|P97470|PP4C_MOUSE	sp|P63330|PP2AA_MOUSE Serine/threonine-protein phosphatase 2A catalytic subunit alpha isoform OS=Mus musculus OX=10090 GN=Ppp2ca PE=1 SV=1;sp|P62715|PP2AB_MOUSE Serine/threonine-protein phosphatase 2A catalytic subunit beta isoform OS=Mus musculus OX=10090	3	9	9	9	34.6	35.608	1559400000	1647500000	1391700000	1456000000	1435800000	1566500000	799160000	1448700000	1858300000	1628600000	1671100000	2059100000		Quantified
P67778	Prohibitin	Phb	FUNCTION: Regulates mitochondrial respiration activity and in aging (By similarity). In neurons, regulates the protein turnover of OMA1 in a cardiolipin-binding manner (PubMed:31819158). Inhibits DNA synthesis (By similarity). {ECO:0000250|UniProtKB:P35232, ECO:0000250|UniProtKB:P67779, ECO:0000269|PubMed:31819158}.	sp|P67778|PHB_MOUSE	sp|P67778|PHB_MOUSE Prohibitin OS=Mus musculus OX=10090 GN=Phb PE=1 SV=1	1	19	19	19	80.9	29.82	18509000000	17874000000	28172000000	24045000000	12846000000	27314000000	11178000000	28330000000	10291000000	25100000000	13057000000	20114000000		Quantified
P67984	60S ribosomal protein L22	Rpl22		sp|P67984|RL22_MOUSE	sp|P67984|RL22_MOUSE 60S ribosomal protein L22 OS=Mus musculus OX=10090 GN=Rpl22 PE=1 SV=2	1	4	4	4	50.8	14.759	1058200000	840760000	969700000	935230000	925240000	944620000	974570000	927770000	1025600000	1127500000	983260000	1224600000		Quantified
P68033	Actin, alpha cardiac muscle 1	Actc1	FUNCTION: Actins are highly conserved proteins that are involved in various types of cell motility and are ubiquitously expressed in all eukaryotic cells.	sp|P68033|ACTC_MOUSE	sp|P68033|ACTC_MOUSE Actin, alpha cardiac muscle 1 OS=Mus musculus OX=10090 GN=Actc1 PE=1 SV=1	1	25	25	0	72.4	42.019	574780000000	757860000000	762780000000	561100000000	704030000000	730210000000	876970000000	583240000000	946000000000	819880000000	735480000000	911570000000		Quantified
P68037	Ubiquitin-conjugating enzyme E2 L3	Ube2l3	FUNCTION: Ubiquitin-conjugating enzyme E2 that specifically acts with HECT-type and RBR family E3 ubiquitin-protein ligases. Does not function with most RING-containing E3 ubiquitin-protein ligases because it lacks intrinsic E3-independent reactivity with lysine: in contrast, it has activity with the RBR family E3 enzymes, such as PRKN and ARIH1, that function like function like RING-HECT hybrids…	sp|P68037|UB2L3_MOUSE	sp|P68037|UB2L3_MOUSE Ubiquitin-conjugating enzyme E2 L3 OS=Mus musculus OX=10090 GN=Ube2l3 PE=1 SV=1	1	5	5	5	44.8	17.861	117260000	134270000	132570000	131950000	123190000	126020000	114770000	105110000	162650000	136500000	100890000			Quantified
P68040	Receptor of activated protein C kinase 1	Rack1	FUNCTION: Scaffolding protein involved in the recruitment, assembly and/or regulation of a variety of signaling molecules. Interacts with a wide variety of proteins and plays a role in many cellular processes. Component of the 40S ribosomal subunit involved in translational repression. Involved in the initiation of the ribosome quality control (RQC), a pathway that takes place when a ribosome has…	sp|P68040|RACK1_MOUSE	sp|P68040|RACK1_MOUSE Receptor of activated protein C kinase 1 OS=Mus musculus OX=10090 GN=Rack1 PE=1 SV=3	1	20	20	20	79.8	35.076	5550300000	4034500000	5039500000	4980700000	5327500000	5515400000	4626300000	5166300000	4437900000	4043100000	4846300000	5636200000		Quantified
P68134	Actin, alpha skeletal muscle	Acta1	FUNCTION: Actins are highly conserved proteins that are involved in various types of cell motility and are ubiquitously expressed in all eukaryotic cells.	sp|P68134|ACTS_MOUSE	sp|P68134|ACTS_MOUSE Actin, alpha skeletal muscle OS=Mus musculus OX=10090 GN=Acta1 PE=1 SV=1	1	25	2	2	72.4	42.051	548520000	602020000	574900000	315170000	746100000	68964000	1276900000	771950000	1776000000	1451200000	1138100000	1399500000		Quantified
P68181	cAMP-dependent protein kinase catalytic subunit beta	Prkacb	FUNCTION: Mediates cAMP-dependent signaling triggered by receptor binding to GPCRs. PKA activation regulates diverse cellular processes such as cell proliferation, the cell cycle, differentiation and regulation of microtubule dynamics, chromatin condensation and decondensation, nuclear envelope disassembly and reassembly, as well as regulation of intracellular transport mechanisms and ion flux (P…	sp|P68181|KAPCB_MOUSE	sp|P68181|KAPCB_MOUSE cAMP-dependent protein kinase catalytic subunit beta OS=Mus musculus OX=10090 GN=Prkacb PE=1 SV=2	1	10	2	2	28.2	40.707														Identified
P68254	14-3-3 protein theta	Ywhaq	FUNCTION: Adapter protein implicated in the regulation of a large spectrum of both general and specialized signaling pathways. Binds to a large number of partners, usually by recognition of a phosphoserine or phosphothreonine motif. Binding generally results in the modulation of the activity of the binding partner. Negatively regulates the kinase activity of PDPK1 (By similarity). {ECO:0000250}.	sp|P68254|1433T_MOUSE;sp|O70456|1433S_MOUSE	sp|P68254|1433T_MOUSE 14-3-3 protein theta OS=Mus musculus OX=10090 GN=Ywhaq PE=1 SV=1;sp|O70456|1433S_MOUSE 14-3-3 protein sigma OS=Mus musculus OX=10090 GN=Sfn PE=1 SV=2	2	6	3	3	25.7	27.778	71774000	83799000				89610000	58191000		78476000	109420000	87808000	85163000		Quantified
P68368	Tubulin alpha-4A chain	Tuba4a	FUNCTION: Tubulin is the major constituent of microtubules. It binds two moles of GTP, one at an exchangeable site on the beta chain and one at a non-exchangeable site on the alpha chain.	sp|P68368|TBA4A_MOUSE	sp|P68368|TBA4A_MOUSE Tubulin alpha-4A chain OS=Mus musculus OX=10090 GN=Tuba4a PE=1 SV=1	1	20	20	4	60.3	49.924	15526000000	17268000000	15717000000	13113000000	11889000000	16049000000	19688000000	14314000000	14856000000	15453000000	15120000000	16042000000		Quantified
P68372	Tubulin beta-4B chain	Tubb4b	FUNCTION: Tubulin is the major constituent of microtubules. It binds two moles of GTP, one at an exchangeable site on the beta chain and one at a non-exchangeable site on the alpha chain.	sp|P68372|TBB4B_MOUSE	sp|P68372|TBB4B_MOUSE Tubulin beta-4B chain OS=Mus musculus OX=10090 GN=Tubb4b PE=1 SV=1	1	22	22	1	72.1	49.83	12818000000	14236000000	14041000000	11543000000	11301000000	13637000000	16801000000	12799000000	14826000000	16099000000	14052000000	14595000000		Quantified
P68373	Tubulin alpha-1C chain	Tuba1c	FUNCTION: Tubulin is the major constituent of microtubules. It binds two moles of GTP, one at an exchangeable site on the beta chain and one at a non-exchangeable site on the alpha chain.	sp|P68373|TBA1C_MOUSE	sp|P68373|TBA1C_MOUSE Tubulin alpha-1C chain OS=Mus musculus OX=10090 GN=Tuba1c PE=1 SV=1	1	20	2	1	60.1	49.909	826440000	840550000	885350000	870230000	919420000	1158800000	1108500000	1012300000	860390000	966830000	955690000	1391500000		Quantified
P68433	Histone H3.1	H3c1	FUNCTION: Core component of nucleosome. Nucleosomes wrap and compact DNA into chromatin, limiting DNA accessibility to the cellular machineries which require DNA as a template. Histones thereby play a central role in transcription regulation, DNA repair, DNA replication and chromosomal stability. DNA accessibility is regulated via a complex set of post-translational modifications of histones, als…	sp|P68433|H31_MOUSE	sp|P68433|H31_MOUSE Histone H3.1 OS=Mus musculus OX=10090 GN=H3c1 PE=1 SV=2	1	5	1	1	40.4	15.404	435380000	236410000	170390000	298840000	66239000	203430000	564440000	97477000	1344400000	446480000	475200000	457920000		Quantified
P70122	Ribosome maturation protein SBDS	Sbds	FUNCTION: Required for the assembly of mature ribosomes and ribosome biogenesis. Together with EFL1, triggers the GTP-dependent release of EIF6 from 60S pre-ribosomes in the cytoplasm, thereby activating ribosomes for translation competence by allowing 80S ribosome assembly and facilitating EIF6 recycling to the nucleus, where it is required for 60S rRNA processing and nuclear export. Required fo…	sp|P70122|SBDS_MOUSE	sp|P70122|SBDS_MOUSE Ribosome maturation protein SBDS OS=Mus musculus OX=10090 GN=Sbds PE=1 SV=4	1	3	3	3	14	28.78	18256000	35719000	31329000	42050000	33686000	35785000	26345000	31668000	29464000	47536000	38619000	31843000		Quantified
P70168	Importin subunit beta-1	Kpnb1	FUNCTION: Functions in nuclear protein import, either in association with an adapter protein, like an importin-alpha subunit, which binds to nuclear localization signals (NLS) in cargo substrates, or by acting as autonomous nuclear transport receptor. Acting autonomously, serves itself as NLS receptor. Docking of the importin/substrate complex to the nuclear pore complex (NPC) is mediated by KPNB…	sp|P70168|IMB1_MOUSE	sp|P70168|IMB1_MOUSE Importin subunit beta-1 OS=Mus musculus OX=10090 GN=Kpnb1 PE=1 SV=2	1	8	8	8	10.6	97.183	274900000	362230000	185180000	294920000		12521000	81719000		308980000	127780000	35737000	486290000		Quantified
P70170	ATP-binding cassette sub-family C member 9	Abcc9	FUNCTION: Subunit of ATP-sensitive potassium channels (KATP). Can form cardiac and smooth muscle-type KATP channels with KCNJ11. KCNJ11 forms the channel pore while ABCC9 is required for activation and regulation.	sp|P70170|ABCC9_MOUSE	sp|P70170|ABCC9_MOUSE ATP-binding cassette sub-family C member 9 OS=Mus musculus OX=10090 GN=Abcc9 PE=1 SV=2	1	15	15	15	11.8	174.24	214190000	142960000	184980000	229240000	172210000	171360000	121510000	216750000	137650000	192170000	134980000	157720000		Quantified
P70174	Histamine H1 receptor	Hrh1	FUNCTION: In peripheral tissues, the H1 subclass of histamine receptors mediates the contraction of smooth muscles, increase in capillary permeability due to contraction of terminal venules, and catecholamine release from adrenal medulla, as well as mediating neurotransmission in the central nervous system. Involved in circadian rhythm of locomotor activity and exploratory behavior. Also involved…	sp|P70174|HRH1_MOUSE	sp|P70174|HRH1_MOUSE Histamine H1 receptor OS=Mus musculus OX=10090 GN=Hrh1 PE=1 SV=2	1	1	1	1	2.5	55.681	75278000	59564000	106760000	57863000		83405000	48425000	78485000	77809000		105070000	83869000		Quantified
P70194	C-type lectin domain family 4 member F	Clec4f	FUNCTION: Receptor with an affinity for galactose and fucose. Could be involved in endocytosis.	sp|P70194|CLC4F_MOUSE	sp|P70194|CLC4F_MOUSE C-type lectin domain family 4 member F OS=Mus musculus OX=10090 GN=Clec4f PE=1 SV=1	1	2	2	2	4.4	61.268	1502300000	572500000	854350000	405370000	852060000	655020000	878140000	750770000	631030000	638670000	934940000	673090000		Quantified
P70213	Friend virus susceptibility protein 1	Fv1	FUNCTION: Retroviral restriction factor that prevents infection by gammaretroviruses. Acts by interacting with the capsid protein ca after entry of the virus into the cell. This interaction presumably disrupt the capsid thereby inactivating the viral genome, making it unable to enter host nucleus and integrate into host genome. {ECO:0000269|PubMed:16474118}.	sp|P70213|FV1_MOUSE	sp|P70213|FV1_MOUSE Friend virus susceptibility protein 1 OS=Mus musculus OX=10090 GN=Fv1 PE=4 SV=1	1	4	4	4	11.8	51.996	40553000			65848000	36142000						37037000			Identified
P70236	Dual specificity mitogen-activated protein kinase kinase 6	Map2k6	FUNCTION: Dual specificity protein kinase which acts as an essential component of the MAP kinase signal transduction pathway. With MAP3K3/MKK3, catalyzes the concomitant phosphorylation of a threonine and a tyrosine residue in the MAP kinases p38 MAPK11, MAPK12, MAPK13 and MAPK14 and plays an important role in the regulation of cellular responses to cytokines and all kinds of stresses. Especially…	sp|P70236|MP2K6_MOUSE	sp|P70236|MP2K6_MOUSE Dual specificity mitogen-activated protein kinase kinase 6 OS=Mus musculus OX=10090 GN=Map2k6 PE=1 SV=1	1	3	2	2	11.1	37.432														Identified
P70245	3-beta-hydroxysteroid-Delta(8),Delta(7)-isomerase	Ebp	FUNCTION: Catalyzes the conversion of Delta(8)-sterols to their corresponding Delta(7)-isomers. {ECO:0000269|PubMed:8798407}.	sp|P70245|EBP_MOUSE	sp|P70245|EBP_MOUSE 3-beta-hydroxysteroid-Delta(8),Delta(7)-isomerase OS=Mus musculus OX=10090 GN=Ebp PE=1 SV=3	1	2	2	2	10.9	26.215	20806000	15147000		20867000	35044000	13317000	17583000	24364000			13196000			Quantified
P70257	Nuclear factor 1 X-type	Nfix	FUNCTION: Recognizes and binds the palindromic sequence 5'-TTGGCNNNNNGCCAA-3' present in viral and cellular promoters and in the origin of replication of adenovirus type 2. These proteins are individually capable of activating transcription and replication. Isoform NFIX1 acts as a transcriptional activator while isoform NFIX3 acts as a repressor. {ECO:0000269|PubMed:8581067}.	sp|P70257|NFIX_MOUSE	sp|P70257|NFIX_MOUSE Nuclear factor 1 X-type OS=Mus musculus OX=10090 GN=Nfix PE=1 SV=2	1	2	2	1	4.3	53.394		31079000	41579000	25845000	36755000	31872000		22549000	42137000		37029000			Quantified
P70290	55 kDa erythrocyte membrane protein	Mpp1	FUNCTION: Essential regulator of neutrophil polarity. Regulates neutrophil polarization by regulating AKT1 phosphorylation through a mechanism that is independent of PIK3CG activity. {ECO:0000269|PubMed:19897731}.	sp|P70290|EM55_MOUSE	sp|P70290|EM55_MOUSE 55 kDa erythrocyte membrane protein OS=Mus musculus OX=10090 GN=Mpp1 PE=1 SV=1	1	2	2	2	5.2	52.227	11245000	22028000		10957000				10981000	17837000		14309000	23929000		Quantified
P70333	Heterogeneous nuclear ribonucleoprotein H2	Hnrnph2	FUNCTION: This protein is a component of the heterogeneous nuclear ribonucleoprotein (hnRNP) complexes which provide the substrate for the processing events that pre-mRNAs undergo before becoming functional, translatable mRNAs in the cytoplasm. Binds poly(RG) (By similarity). {ECO:0000250}.	sp|P70333|HNRH2_MOUSE	sp|P70333|HNRH2_MOUSE Heterogeneous nuclear ribonucleoprotein H2 OS=Mus musculus OX=10090 GN=Hnrnph2 PE=1 SV=1	1	11	6	6	37.4	49.279		91708000	148760000	151390000	160730000	74315000	148790000	127940000	189830000	152090000	89231000	83482000		Quantified
P70372	ELAV-like protein 1	Elavl1	FUNCTION: RNA-binding protein that binds to the 3'-UTR region of mRNAs and increases their stability. Involved in embryonic stem cells (ESCs) differentiation: preferentially binds mRNAs that are not methylated by N6-methyladenosine (m6A), stabilizing them, promoting ESCs differentiation (PubMed:24394384). Binds to poly-U elements and AU-rich elements (AREs) in the 3'-UTR of target mRNAs. Binds av…	sp|P70372|ELAV1_MOUSE	sp|P70372|ELAV1_MOUSE ELAV-like protein 1 OS=Mus musculus OX=10090 GN=Elavl1 PE=1 SV=2	1	9	9	9	30.7	36.169	375860000	333100000	356230000	462380000	326510000	318270000	270720000	323260000	363640000	199780000	334210000	392190000		Quantified
P70398	Probable ubiquitin carboxyl-terminal hydrolase FAF-X	Usp9x	FUNCTION: Deubiquitinase involved both in the processing of ubiquitin precursors and of ubiquitinated proteins. May therefore play an important regulatory role at the level of protein turnover by preventing degradation of proteins through the removal of conjugated ubiquitin. Specifically hydrolyzes 'Lys-48'-, 'Lys-29'- and 'Lys-33'-linked polyubiquitins chains. Essential component of TGF-beta/BMP…	sp|P70398|USP9X_MOUSE	sp|P70398|USP9X_MOUSE Probable ubiquitin carboxyl-terminal hydrolase FAF-X OS=Mus musculus OX=10090 GN=Usp9x PE=1 SV=2	1	7	7	7	3	290.71	14884000	22324000	20192000	12240000	13585000	11108000		15255000	15629000	17925000	14994000	21492000		Quantified
P70404	Isocitrate dehydrogenase [NAD] subunit gamma 1, mitochondrial	Idh3g	FUNCTION: Regulatory subunit which plays a role in the allosteric regulation of the enzyme catalyzing the decarboxylation of isocitrate (ICT) into alpha-ketoglutarate. The heterodimer composed of the alpha (IDH3A) and beta (IDH3B) subunits and the heterodimer composed of the alpha (IDH3A) and gamma (IDH3G) subunits, have considerable basal activity but the full activity of the heterotetramer (con…	sp|P70404|IDHG1_MOUSE	sp|P70404|IDHG1_MOUSE Isocitrate dehydrogenase [NAD] subunit gamma 1, mitochondrial OS=Mus musculus OX=10090 GN=Idh3g PE=1 SV=1	1	15	15	15	55	42.785	13146000000	13349000000	15276000000	12788000000	10956000000	14064000000	11735000000	12497000000	14144000000	16107000000	14464000000	14405000000		Quantified
P70414	Sodium/calcium exchanger 1	Slc8a1	FUNCTION: Mediates the exchange of one Ca(2+) ion against three to four Na(+) ions across the cell membrane, and thereby contributes to the regulation of cytoplasmic Ca(2+) levels and Ca(2+)-dependent cellular processes (PubMed:8659820). Contributes to Ca(2+) transport during excitation-contraction coupling in muscle. In a first phase, voltage-gated channels mediate the rapid increase of cytoplas…	sp|P70414|NAC1_MOUSE	sp|P70414|NAC1_MOUSE Sodium/calcium exchanger 1 OS=Mus musculus OX=10090 GN=Slc8a1 PE=1 SV=1	1	4	4	4	5.3	108.03	153050000	122610000	185010000	178850000	211300000	154730000	114860000	187500000	153620000	104290000	115700000	174680000		Quantified
P70670	Nascent polypeptide-associated complex subunit alpha, muscle-specific form	Naca	FUNCTION: Cardiac- and muscle-specific transcription factor. May act to regulate the expression of genes involved in the development of myotubes. Plays a critical role in ventricular cardiomyocyte expansion and regulates postnatal skeletal muscle growth and regeneration. Involved in the organized assembly of thick and thin filaments of myofibril sarcomeres. {ECO:0000269|PubMed:21071677, ECO:00002…	sp|P70670|NACAM_MOUSE;sp|Q60817|NACA_MOUSE	sp|P70670|NACAM_MOUSE Nascent polypeptide-associated complex subunit alpha, muscle-specific form OS=Mus musculus OX=10090 GN=Naca PE=1 SV=2	2	27	27	27	18.8	220.5	217000000	296290000	250580000	218300000	208170000	182450000	197390000	150500000	224650000	196060000	186240000	177030000		Quantified
P70695	Fructose-1,6-bisphosphatase isozyme 2	Fbp2	FUNCTION: Catalyzes the hydrolysis of fructose 1,6-bisphosphate to fructose 6-phosphate in the presence of divalent cations and probably participates in glycogen synthesis from carbohydrate precursors, such as lactate. {ECO:0000269|PubMed:8034042}.	sp|P70695|F16P2_MOUSE	sp|P70695|F16P2_MOUSE Fructose-1,6-bisphosphatase isozyme 2 OS=Mus musculus OX=10090 GN=Fbp2 PE=1 SV=2	1	5	5	5	18.9	36.947	55590000	84494000	82514000	63593000	49984000	77271000	31436000	43496000	50255000	63373000	63886000	30760000		Quantified
P70697	Uroporphyrinogen decarboxylase	Urod	FUNCTION: Catalyzes the decarboxylation of four acetate groups of uroporphyrinogen-III to yield coproporphyrinogen-III. {ECO:0000250}.	sp|P70697|DCUP_MOUSE	sp|P70697|DCUP_MOUSE Uroporphyrinogen decarboxylase OS=Mus musculus OX=10090 GN=Urod PE=1 SV=2	1	1	1	1	3.8	40.691	33530000	28774000	39433000	33720000	43107000	47042000	33004000	37067000	43865000	45581000	36026000	44647000		Quantified
P70698	CTP synthase 1	Ctps1	FUNCTION: This enzyme is involved in the de novo synthesis of CTP, a precursor of DNA, RNA and phospholipids. Catalyzes the ATP-dependent amination of UTP to CTP with either L-glutamine or ammonia as a source of nitrogen. This enzyme and its product, CTP, play a crucial role in the proliferation of activated lymphocytes and therefore in immunity. {ECO:0000250|UniProtKB:P17812}.	sp|P70698|PYRG1_MOUSE;sp|P70303|PYRG2_MOUSE	sp|P70698|PYRG1_MOUSE CTP synthase 1 OS=Mus musculus OX=10090 GN=Ctps1 PE=1 SV=2	2	4	4	4	9.8	66.682	38564000	32459000	45080000	32236000	35259000	27846000	21163000	33757000	62634000	37465000	49107000	48644000		Quantified
P70699	Lysosomal alpha-glucosidase	Gaa	FUNCTION: Essential for the degradation of glycogen in lysosomes. Has highest activity on alpha-1,4-linked glycosidic linkages, but can also hydrolyze alpha-1,6-linked glucans. {ECO:0000250|UniProtKB:P10253}.	sp|P70699|LYAG_MOUSE	sp|P70699|LYAG_MOUSE Lysosomal alpha-glucosidase OS=Mus musculus OX=10090 GN=Gaa PE=1 SV=2	1	2	2	2	3.7	106.25	31868000	35149000	31700000	35258000	29691000	39306000		28541000			32457000	23457000		Quantified
P80313	T-complex protein 1 subunit eta	Cct7	FUNCTION: Component of the chaperonin-containing T-complex (TRiC), a molecular chaperone complex that assists the folding of proteins upon ATP hydrolysis. The TRiC complex mediates the folding of WRAP53/TCAB1, thereby regulating telomere maintenance. The TRiC complex plays a role in the folding of actin and tubulin. {ECO:0000250|UniProtKB:Q99832}.	sp|P80313|TCPH_MOUSE	sp|P80313|TCPH_MOUSE T-complex protein 1 subunit eta OS=Mus musculus OX=10090 GN=Cct7 PE=1 SV=1	1	21	21	21	48.7	59.652	984420000	988020000	1083100000	1430500000	915120000	1108500000	714170000	992290000	1058600000	1408700000	1169700000	1040300000		Quantified
P80314	T-complex protein 1 subunit beta	Cct2	FUNCTION: Component of the chaperonin-containing T-complex (TRiC), a molecular chaperone complex that assists the folding of proteins upon ATP hydrolysis. The TRiC complex mediates the folding of WRAP53/TCAB1, thereby regulating telomere maintenance. As part of the TRiC complex may play a role in the assembly of BBSome, a complex involved in ciliogenesis regulating transports vesicles to the cili…	sp|P80314|TCPB_MOUSE	sp|P80314|TCPB_MOUSE T-complex protein 1 subunit beta OS=Mus musculus OX=10090 GN=Cct2 PE=1 SV=4	1	22	22	22	56.8	57.477	925920000	975200000	1232200000	1050800000	1023400000	1182400000	862270000	1146400000	1002700000	1340000000	1375100000	1094900000		Quantified
P80315	T-complex protein 1 subunit delta	Cct4	FUNCTION: Component of the chaperonin-containing T-complex (TRiC), a molecular chaperone complex that assists the folding of proteins upon ATP hydrolysis. The TRiC complex mediates the folding of WRAP53/TCAB1, thereby regulating telomere maintenance. As part of the TRiC complex may play a role in the assembly of BBSome, a complex involved in ciliogenesis regulating transports vesicles to the cili…	sp|P80315|TCPD_MOUSE	sp|P80315|TCPD_MOUSE T-complex protein 1 subunit delta OS=Mus musculus OX=10090 GN=Cct4 PE=1 SV=3	1	20	20	20	42.1	58.066	1422100000	1420000000	1530100000	1502400000	1394900000	1611500000	1015700000	1346600000	1452200000	1779600000	1586200000	1330500000		Quantified
P80316	T-complex protein 1 subunit epsilon	Cct5	FUNCTION: Component of the chaperonin-containing T-complex (TRiC), a molecular chaperone complex that assists the folding of proteins upon ATP hydrolysis. The TRiC complex mediates the folding of WRAP53/TCAB1, thereby regulating telomere maintenance. As part of the TRiC complex may play a role in the assembly of BBSome, a complex involved in ciliogenesis regulating transports vesicles to the cili…	sp|P80316|TCPE_MOUSE	sp|P80316|TCPE_MOUSE T-complex protein 1 subunit epsilon OS=Mus musculus OX=10090 GN=Cct5 PE=1 SV=1	1	24	24	24	61.6	59.623	2662600000	2594500000	2851100000	2571300000	2665200000	2793400000	1715700000	2536000000	2754100000	3464100000	2844600000	2721700000		Quantified
P80317	T-complex protein 1 subunit zeta	Cct6a	FUNCTION: Component of the chaperonin-containing T-complex (TRiC), a molecular chaperone complex that assists the folding of proteins upon ATP hydrolysis. The TRiC complex mediates the folding of WRAP53/TCAB1, thereby regulating telomere maintenance. The TRiC complex plays a role in the folding of actin and tubulin. {ECO:0000250|UniProtKB:P40227}.	sp|P80317|TCPZ_MOUSE;sp|Q61390|TCPW_MOUSE	sp|P80317|TCPZ_MOUSE T-complex protein 1 subunit zeta OS=Mus musculus OX=10090 GN=Cct6a PE=1 SV=3	2	20	20	20	49.5	58.004	1846500000	2225400000	2438600000	1967100000	1681400000	2222800000	988650000	1696600000	2362700000	2791400000	2413700000	1998400000		Quantified
P80318	T-complex protein 1 subunit gamma	Cct3	FUNCTION: Component of the chaperonin-containing T-complex (TRiC), a molecular chaperone complex that assists the folding of proteins upon ATP hydrolysis. The TRiC complex mediates the folding of WRAP53/TCAB1, thereby regulating telomere maintenance. As part of the TRiC complex may play a role in the assembly of BBSome, a complex involved in ciliogenesis regulating transports vesicles to the cili…	sp|P80318|TCPG_MOUSE	sp|P80318|TCPG_MOUSE T-complex protein 1 subunit gamma OS=Mus musculus OX=10090 GN=Cct3 PE=1 SV=1	1	27	27	27	52.8	60.629	2518000000	2468600000	2659900000	2462700000	2311600000	2385800000	1899400000	2643900000	2481500000	3073100000	2702200000	2716700000		Quantified
P82347	Delta-sarcoglycan	Sgcd	FUNCTION: Component of the sarcoglycan complex, a subcomplex of the dystrophin-glycoprotein complex which forms a link between the F-actin cytoskeleton and the extracellular matrix.	sp|P82347|SGCD_MOUSE	sp|P82347|SGCD_MOUSE Delta-sarcoglycan OS=Mus musculus OX=10090 GN=Sgcd PE=1 SV=1	1	8	8	8	34.9	32.133	209280000	234410000	214020000	355800000	254030000	221890000	190370000	288680000	205800000	171890000	203450000	183880000		Quantified
P82348	Gamma-sarcoglycan	Sgcg	FUNCTION: Component of the sarcoglycan complex, a subcomplex of the dystrophin-glycoprotein complex which forms a link between the F-actin cytoskeleton and the extracellular matrix.	sp|P82348|SGCG_MOUSE	sp|P82348|SGCG_MOUSE Gamma-sarcoglycan OS=Mus musculus OX=10090 GN=Sgcg PE=1 SV=2	1	6	6	6	31.3	32.081	320300000	303680000	277510000	300390000	292700000	291750000	247600000	290230000	252080000	260390000	362270000	197000000		Quantified
P82349	Beta-sarcoglycan	Sgcb	FUNCTION: Component of the sarcoglycan complex, a subcomplex of the dystrophin-glycoprotein complex which forms a link between the F-actin cytoskeleton and the extracellular matrix.	sp|P82349|SGCB_MOUSE	sp|P82349|SGCB_MOUSE Beta-sarcoglycan OS=Mus musculus OX=10090 GN=Sgcb PE=1 SV=1	1	12	12	12	56.9	34.872	294490000	300220000	339610000	309050000	261360000	221690000	204850000	273310000	355400000	135840000	280100000	241750000		Quantified
P82350	Alpha-sarcoglycan	Sgca	FUNCTION: Component of the sarcoglycan complex, a subcomplex of the dystrophin-glycoprotein complex which forms a link between the F-actin cytoskeleton and the extracellular matrix.	sp|P82350|SGCA_MOUSE	sp|P82350|SGCA_MOUSE Alpha-sarcoglycan OS=Mus musculus OX=10090 GN=Sgca PE=1 SV=1	1	14	14	14	49.4	43.286	972620000	763070000	972790000	1145800000	908320000	731500000	883230000	928130000	891930000	717290000	905850000	882060000		Quantified
P83882	60S ribosomal protein L36a	Rpl36a		sp|P83882|RL36A_MOUSE	sp|P83882|RL36A_MOUSE 60S ribosomal protein L36a OS=Mus musculus OX=10090 GN=Rpl36a PE=3 SV=2	1	4	4	4	24.5	12.441	863660000	657190000	362990000	294780000	506300000	573520000	526360000	484150000	471520000	510530000	347830000	389040000		Quantified
P83887	Tubulin gamma-1 chain	Tubg1	FUNCTION: Tubulin is the major constituent of microtubules. The gamma chain is found at microtubule organizing centers (MTOC) such as the spindle poles or the centrosome. Pericentriolar matrix component that regulates alpha/beta chain minus-end nucleation, centrosome duplication and spindle formation (By similarity). {ECO:0000250}.	sp|P83887|TBG1_MOUSE;sp|Q8VCK3|TBG2_MOUSE	sp|P83887|TBG1_MOUSE Tubulin gamma-1 chain OS=Mus musculus OX=10090 GN=Tubg1 PE=1 SV=1;sp|Q8VCK3|TBG2_MOUSE Tubulin gamma-2 chain OS=Mus musculus OX=10090 GN=Tubg2 PE=1 SV=1	2	2	2	2	8.4	51.1				13550000					11670000					Identified
P84078	ADP-ribosylation factor 1	Arf1	FUNCTION: GTP-binding protein involved in protein trafficking among different compartments (PubMed:11950392). Modulates vesicle budding and uncoating within the Golgi complex. Deactivation induces the redistribution of the entire Golgi complex to the endoplasmic reticulum, suggesting a crucial role in protein trafficking. In its GTP-bound form, its triggers the association with coat proteins with…	sp|P84078|ARF1_MOUSE;sp|P61205|ARF3_MOUSE	sp|P84078|ARF1_MOUSE ADP-ribosylation factor 1 OS=Mus musculus OX=10090 GN=Arf1 PE=1 SV=2;sp|P61205|ARF3_MOUSE ADP-ribosylation factor 3 OS=Mus musculus OX=10090 GN=Arf3 PE=2 SV=2	2	11	11	2	73.5	20.697	3477400000	3463300000	4135900000	3698900000	3926400000	4267400000	2968300000	4459600000	4315900000	4637400000	4799100000	4183400000		Quantified
P84084	ADP-ribosylation factor 5	Arf5	FUNCTION: GTP-binding protein involved in protein trafficking; may modulate vesicle budding and uncoating within the Golgi apparatus. {ECO:0000269|PubMed:11950392}.	sp|P84084|ARF5_MOUSE	sp|P84084|ARF5_MOUSE ADP-ribosylation factor 5 OS=Mus musculus OX=10090 GN=Arf5 PE=1 SV=2	1	9	4	3	60.6	20.529	194530000	159020000	183320000	154510000	147700000	160330000	132260000	148340000	183120000	193100000	159430000	177430000		Quantified
P84089	Enhancer of rudimentary homolog	Erh	FUNCTION: May have a role in the cell cycle.	sp|P84089|ERH_MOUSE	sp|P84089|ERH_MOUSE Enhancer of rudimentary homolog OS=Mus musculus OX=10090 GN=Erh PE=1 SV=1	1	2	2	2	26.9	12.259	21909000	23140000	75270000	16513000	26518000	28182000	27030000	41021000	29503000	32608000	17343000	22775000		Quantified
P84091	AP-2 complex subunit mu	Ap2m1	FUNCTION: Component of the adaptor protein complex 2 (AP-2). Adaptor protein complexes function in protein transport via transport vesicles in different membrane traffic pathways. Adaptor protein complexes are vesicle coat components and appear to be involved in cargo selection and vesicle formation. AP-2 is involved in clathrin-dependent endocytosis in which cargo proteins are incorporated into …	sp|P84091|AP2M1_MOUSE	sp|P84091|AP2M1_MOUSE AP-2 complex subunit mu OS=Mus musculus OX=10090 GN=Ap2m1 PE=1 SV=1	1	10	10	10	29	49.654	181570000	182900000	190590000	223440000	183570000	154070000	169400000	205520000	218090000	188440000	227910000	175920000		Quantified
P84096	Rho-related GTP-binding protein RhoG	Rhog	FUNCTION: Required for the formation of membrane ruffles during macropinocytosis. Plays a role in cell migration and is required for the formation of cup-like structures during trans-endothelial migration of leukocytes (By similarity). {ECO:0000250}.	sp|P84096|RHOG_MOUSE	sp|P84096|RHOG_MOUSE Rho-related GTP-binding protein RhoG OS=Mus musculus OX=10090 GN=Rhog PE=1 SV=1	1	8	8	7	59.7	21.308	183310000	153750000	166690000	165650000	157770000	154000000	128440000	157890000	148840000	172630000	170770000	144220000		Quantified
P84099	60S ribosomal protein L19	Rpl19		sp|P84099|RL19_MOUSE	sp|P84099|RL19_MOUSE 60S ribosomal protein L19 OS=Mus musculus OX=10090 GN=Rpl19 PE=1 SV=1	1	4	4	4	20.9	23.466	626780000	668280000	489310000	760530000	579760000	803500000	572750000	703890000	523280000	542920000	1023700000	509470000		Quantified
P84104	Serine/arginine-rich splicing factor 3	Srsf3	FUNCTION: Splicing factor that specifically promotes exon-inclusion during alternative splicing. Interaction with YTHDC1, a RNA-binding protein that recognizes and binds N6-methyladenosine (m6A)-containing RNAs, promotes recruitment of SRSF3 to its mRNA-binding elements adjacent to m6A sites, leading to exon-inclusion during alternative splicing. Also functions as export adapter involved in mRNA …	sp|P84104|SRSF3_MOUSE	sp|P84104|SRSF3_MOUSE Serine/arginine-rich splicing factor 3 OS=Mus musculus OX=10090 GN=Srsf3 PE=1 SV=1	1	3	3	2	21.3	19.329	85369000	87891000	106300000	89161000	82713000	65229000	74574000	100830000	77577000	78764000	59617000	88254000		Quantified
P84228	Histone H3.2	H3c2	FUNCTION: Core component of nucleosome. Nucleosomes wrap and compact DNA into chromatin, limiting DNA accessibility to the cellular machineries which require DNA as a template. Histones thereby play a central role in transcription regulation, DNA repair, DNA replication and chromosomal stability. DNA accessibility is regulated via a complex set of post-translational modifications of histones, als…	sp|P84228|H32_MOUSE	sp|P84228|H32_MOUSE Histone H3.2 OS=Mus musculus OX=10090 GN=H3c2 PE=1 SV=2	1	5	1	1	40.4	15.388	4184800000	1424300000	1403100000	1762600000	1387700000	1168000000	5050800000	3447300000	3637200000	4199300000	3411800000	3410600000		Quantified
P85094	Isochorismatase domain-containing protein 2A	Isoc2a		sp|P85094|ISC2A_MOUSE	sp|P85094|ISC2A_MOUSE Isochorismatase domain-containing protein 2A OS=Mus musculus OX=10090 GN=Isoc2a PE=1 SV=1	1	3	3	3	32.5	22.417	90303000	108110000	119930000	88862000	123220000	93044000	148790000	95986000	120030000	118570000	106100000	107700000		Quantified
P97290	Plasma protease C1 inhibitor	Serping1	FUNCTION: Activation of the C1 complex is under control of the C1-inhibitor. It forms a proteolytically inactive stoichiometric complex with the C1r or C1s proteases. May play a potentially crucial role in regulating important physiological pathways including complement activation, blood coagulation, fibrinolysis and the generation of kinins. Very efficient inhibitor of FXIIa. May inhibit chymotr…	sp|P97290|IC1_MOUSE	sp|P97290|IC1_MOUSE Plasma protease C1 inhibitor OS=Mus musculus OX=10090 GN=Serping1 PE=1 SV=3	1	2	2	2	5.6	55.584												22178000		Identified
P97333	Neuropilin-1	Nrp1	FUNCTION: Receptor involved in the development of the cardiovascular system, in angiogenesis, in the formation of certain neuronal circuits and in organogenesis outside the nervous system (By similarity). Mediates the chemorepulsant activity of semaphorins (PubMed:26503042). Binds to semaphorin 3A, the PLGF-2 isoform of PGF, the VEGF165 isoform of VEGFA and VEGFB (By similarity). Coexpression wit…	sp|P97333|NRP1_MOUSE	sp|P97333|NRP1_MOUSE Neuropilin-1 OS=Mus musculus OX=10090 GN=Nrp1 PE=1 SV=2	1	8	8	8	12.2	103	92304000	102620000	110440000	85771000	111390000	87510000	53255000	111590000	99274000	89980000	105120000	87200000		Quantified
P97351	40S ribosomal protein S3a	Rps3a	FUNCTION: May play a role during erythropoiesis through regulation of transcription factor DDIT3. {ECO:0000255|HAMAP-Rule:MF_03122, ECO:0000269|PubMed:10713066}.	sp|P97351|RS3A_MOUSE	sp|P97351|RS3A_MOUSE 40S ribosomal protein S3a OS=Mus musculus OX=10090 GN=Rps3a PE=1 SV=3	1	14	14	14	52.7	29.885	4403200000	2840000000	3708200000	3876100000	3250800000	3470500000	3602900000	3588400000	3059300000	3030000000	2640100000	3998300000		Quantified
P97370	Sodium/potassium-transporting ATPase subunit beta-3	Atp1b3	FUNCTION: This is the non-catalytic component of the active enzyme, which catalyzes the hydrolysis of ATP coupled with the exchange of Na(+) and K(+) ions across the plasma membrane. The exact function of the beta-3 subunit is not known.	sp|P97370|AT1B3_MOUSE	sp|P97370|AT1B3_MOUSE Sodium/potassium-transporting ATPase subunit beta-3 OS=Mus musculus OX=10090 GN=Atp1b3 PE=1 SV=1	1	2	2	2	9.7	31.775			48331000	107120000		104430000								Identified
P97371	Proteasome activator complex subunit 1	Psme1	FUNCTION: Implicated in immunoproteasome assembly and required for efficient antigen processing. The PA28 activator complex enhances the generation of class I binding peptides by altering the cleavage pattern of the proteasome.	sp|P97371|PSME1_MOUSE	sp|P97371|PSME1_MOUSE Proteasome activator complex subunit 1 OS=Mus musculus OX=10090 GN=Psme1 PE=1 SV=2	1	5	5	5	20.9	28.673	26866000	35147000	51817000	47720000	46586000	18023000		18325000		23392000				Quantified
P97372	Proteasome activator complex subunit 2	Psme2	FUNCTION: Implicated in immunoproteasome assembly and required for efficient antigen processing. The PA28 activator complex enhances the generation of class I binding peptides by altering the cleavage pattern of the proteasome.	sp|P97372|PSME2_MOUSE	sp|P97372|PSME2_MOUSE Proteasome activator complex subunit 2 OS=Mus musculus OX=10090 GN=Psme2 PE=1 SV=4	1	4	4	4	23	27.057		22191000		14987000	28172000	26798000	42221000	31631000	28524000	25800000		24232000		Quantified
P97384	Annexin A11	Anxa11	FUNCTION: Required for midbody formation and completion of the terminal phase of cytokinesis (By similarity). Binds specifically to calcyclin in a calcium-dependent manner. {ECO:0000250}.	sp|P97384|ANX11_MOUSE	sp|P97384|ANX11_MOUSE Annexin A11 OS=Mus musculus OX=10090 GN=Anxa11 PE=1 SV=2	1	14	14	14	33.2	54.079	806940000	911340000	781340000	1173100000	1030500000	1010200000	979990000	994290000	839400000	609320000	739290000	788910000		Quantified
P97390	Vacuolar protein sorting-associated protein 45	Vps45	FUNCTION: May play a role in vesicle-mediated protein trafficking from the Golgi stack through the trans-Golgi network.	sp|P97390|VPS45_MOUSE	sp|P97390|VPS45_MOUSE Vacuolar protein sorting-associated protein 45 OS=Mus musculus OX=10090 GN=Vps45 PE=1 SV=1	1	2	2	2	4.2	65.052	22959000	17608000	20689000	23381000	29244000	22787000	26625000	21689000	23241000		24222000			Quantified
[truncated: 1,304 more rows]
