# Supplementary material for: Activation of the cGAS-STING pathway mediated by Irgm1 contributes to the development of restrictive cardiomyopathy induced by cTnIR193H mutation
Source: Research Square preprint supplement (doi:10.21203/rs.3.rs-6200397/v1), 2025-04-04
Supplement: Supplementary file 2 [file 1dbddc1267d322d0999526aa.xlsx]

## Sheet: Figure 1
Figure 1b
Fiborsis areas %	cTnI-WT						cTnIR193H-het
	19.3618	30.9582	21.5192	17.8353	15.8172	17.7399	42.6183	40.8328	32.5973	27.7204	34.5229	41.3957
Figure 1c
Relative Fluorescence intensity	cTnI-WT						cTnIR193H-het
Collagen I	144.705	169.839	150.356	150.046	166.651	141.58	207.703	218.804	228.459	201.293	152.165	164.577
Collagen III	224.11	220.728	215.784	182.035	176.784	165.024	318.3	311.891	254.563	251.671	237.498	237.181
Figure 1d
Relative gene expression	cTnI-WT				cTnIR193H-het
Col1a1	1.00007	0.580389	0.757314	0.69405	1.68479	1.74114	0.916595	1.02
Col3a1	1.00053	0.625933	1.06525	0.923794	2.3288	3.52125	1.44594	1.46804
Figure 1e
Relative protein expression	cTnI-WT			cTnIR193H-het
Collagen I	0.263062	0.33472	0.349411	0.380745	0.414115	0.402963
Collagen III	0.077757	0.103473	0.107222	0.153677	0.130287	0.147806
Figure 1f
Echocardiographic indicators	cTnI-WT						cTnIR193H-het
EF (%)	86.8925	77.473	83.6823	86.4595	81.5789	80.7519	92.5678	81.5137	86.0191	83.1033	75.4334	81.7637
LVID.d (mm)	3.23938	3.38569	3.15823	3.26134	2.94361	3.14637	3.14306	2.98297	2.98057	2.60438	2.57737	2.75725
IVRT(mm)	15.3333	16	16.6667	16	16	15.3333	19.3333	19.3333	18.6667	18	19.3333	20

## Sheet: Figure4
Figure 4a
The interaction between cTnI and Stat1 in vitro	cTnI			cTnIR193H
	0.426731	0.715144	0.50877	0.544533	0.845645	0.678372
Figure 4b
The interaction between cTnI and Irgm1 in vitro	cTnI			cTnIR193H
	0.745507	0.562679	0.808192	0.9509	0.945559	1.11023
Figure 4d
The interaction between cTnI and Irgm1 in vivo	cTnI			cTnIR193H
	0.240672	0.307402	0.363437	0.398409	0.506694	0.622631

## Sheet: Figure 5
Figure 5b
Relative gene expression	Irgm1+/+				Irgm1-/-
Irgm1	1.00026	0.918758	0.942534	1.11281	0.000327	0.000209	9.9e-05	0.000908
Figure 5d
HW/TL(mg/mm)	Irgm1+/+									Irgm1-/-
	9.28962	8.40909	8.96175	9.00553	9.77012	7.05556	6.54762	6.02477	6.85745	8.39081	6.87023	6.66667	6.15902	9.4081	7.05202	6.07362	7.5	8.46154
Figure 5f
Fiborsis areas %	Irgm1+/+										Irgm1-/-
	0.154617	0.181104	0.161369	0.214702	0.14549	0.211768	0.169744	0.198149	0.173076	0.213583	0.364923	0.258651	0.346174	0.242228	0.331647	0.273021	0.348085	0.352296	0.356328	0.275403
Figure 5g
Relative Fluorescence intensity	Irgm1+/+						Irgm1-/-
Collagen I	107.636	118.138	156.786	197.413	206.841	221.55	267.115	241.758	275.698	262.749	238.788	243.787
Collagen III	76.1748	27.7886	66.3894	35.8049	54.4552	53.3699	179.452	163.86	158.176	118.728	103.29	135.571
Figure 5h
Relative gene expression	Irgm1+/+				Irgm1-/-
Col1a1	1.00514	0.831925	0.531711	0.506883	2.15818	1.41807	2.46688	1.54685
Col3a1	1.00074	0.98988	1.08953	0.857141	1.70546	2.04491	1.50502	1.30842
Figure 5i
Relative protein expression	Irgm1+/+			Irgm1-/-
Collagen I	0.289613	0.332424	0.3563	0.387184	0.439917	0.456735
Collagen III	0.086572	0.078794	0.128535	0.147195	0.172484	0.133976
Figure 5j
Echocardiographic indicators	Irgm1+/+						Irgm1-/-
EF (%)	73.5099	79.6528	75.3537	80.2642	79.0033		82.9653	73.9208	70.1919	71.6777	82.6342
IVRT(mm)	15	13.0556	13.0556	14.4444	14.7222	12.7778	15.5556	15	20.2778	19.7222	17.2222	16.1111
LVID.d (mm)	3.03387	3.06425	2.64653	2.94399	2.9634	3.16733	2.73926	3.47184	3.14971	3.35541	3.14655	4.02744

## Sheet: Figure 6
Figure 6b
Relative protein expression	Irgm1+/+			irgm1-/-
cGAS	0.285008	0.349075	0.397814	0.539966	0.513792	0.558229
STING	0.676799	0.736174	0.774056	1.24011	1.00424	1.36581
p-TBK1	0.125028	0.147079	0.194011	0.216168	0.32017	0.282197
TBK1	0.566003	0.563163	0.585214	0.579051	0.571949	0.576522
p-IRF3	1.07792	1.01033	1.06013	1.16099	1.13232	1.11973
IRF3	1.12257	1.03485	1.11402	0.352724	0.306918	0.082237
Figure 6c
Relative gene expression	Irgm1+/+						Irgm1-/-
IFNB1	1.05451	1.01174	0.949176	1.64215	1.91671	3.38576	10.6446	17.7691	8.78603	14.8482	6.08047	4.64003
Figure 6d
Relative IFN-β concentration in heart tissue	Irgm1+/+				Irgm1-/-
	2.67497	2.58881	2.75648	2.88215	3.13874	3.6182	3.08495	2.97974
Figure 6e
IFN-β concentration in serum	Irgm1+/+				Irgm1-/-
	13.7939	10.3494	12.251	11.2963	13.2132	20.1252	15.9433	23.3717

## Sheet: Figure 7
Figure 7b
Relative protein expression	cTnI-WT			cTnIR193H-het
Irgm1	1.25871	1.313	1.24863	1.33776	1.23637	1.19822
Figure 7c
Relative gene expression	cTnI-WT						cTnIR193H-het
Irgm1	1.00019	2.95417	1.06315	0.694344	1.79122	2.34455	2.03145	1.93632	1.7933	1.2541	0.827315	1.43095
Figure 7d
The interaction between Irgm1 and cGAS in vivo	cTnI			cTnIR193H
	0.912403	1.02303	0.898469	0.513403	0.740821	0.627112
Figure 7f
Relative protein expression	cTnI-WT			cTnIR193H-het
cGAS	0.237276	0.252291	0.201616	0.359593	0.342209	0.368418
STING	0.535453	0.526192	0.622619	0.903815	1.16298	1.51577
p-TBK1	0.079372	0.211532	0.163412	0.50683	0.605218	0.459452
TBK1	0.235465	0.510376	0.289207	0.764369	1.02204	0.72478
p-IRF3	0.245431	0.307868	0.436208	0.690328	0.574522	0.70227
IRF3	1.06173	0.972637	1.13456	1.09553	0.944078	1.12222
Figure 7g
Relative gene expression	cTnI-WT					cTnIR193H-het
IFNB1	1.00269	0.428734	0.610157	0.623614	1.54394	1.46645	3.37569	1.33918	1.25907	2.45743
Figure 7h
Relative IFN-β concentration in heart tissue	cTnI-WT					cTnIR193H-het
	11.2125	10.0547	8.27706	10.4335	12.8744	17.3182	19.1649	18.3691	13.8811
Figure 7i
IFN-β concentration in serum	cTnI-WT			cTnIR193H-het
	41.0838	33.5949	38.7574	59.6484	59.9137	54.7408
Figure 7k
Relative protein expression	NC			OE-cTnIR193H
cGAS	0.6	0.639944	0.514221	0.703097	0.737092	0.810924
STING	1.18295	1.21079	1.15511	1.34409	1.33113	1.3
p-TBK1	0.49791	0.553596	0.477321	0.979343	0.6493	0.864155
p-IRF3	0.359802	0.362155	0.4	0.567497	0.730275	0.609085
Figure 7l
Relative IFN-β concentration in primary cardiomyocytes	NC				OE-cTnIR193H
	15.1287	12.1097	13.1807	12.8375	24.6659	17.3006	17.8807	18.6037
Figure 7m
IFN-β concentration in cell culture supernatant	NC				OE-cTnIR193H
	55.1387	50.6859	52.6833	53.28	56.29	59.4158	55.5867	64.4247

## Sheet: Figure 8
Figure 8b
Fiborsis areas %	cTnI-WT+DMSO					cTnIR193H-het+DMSO					cTnIR193H-het+C176
	19.3618	30.9582	21.5192	17.8353	15.8172	40.8328	32.5973	27.7204	34.5229	41.3957	31.3885	19.069	22.5549	23.2692	26.5243
Figure 8c
Relative Fluorescence intensity	cTnI-WT+DMSO						cTnIR193H-het+DMSO						cTnIR193H-het+C176
Collagen I	179.946	154.387	154.478	175.76	165.504	151.147	188.675	190.22	185.739	197.704	177.037	163.001	154.914	182.538	166.686	163.548	152.774	151.147
Collagen III	161.424	150.428	207.414	206.652	198.976	188.955	265.422	350.997	328.716	337.517	217.928	198.312	238.195	234.788	220.258	232.431	198.826	146.101
Figure 8d
Relative protein expression	cTnI-WT+DMSO				cTnIR193H-het+DMSO				cTnIR193H-het+C176
Collagen I	0.223773	0.186664	0.215759	0.233709	0.353593	0.368086	0.380997	0.324715	0.252193	0.194402	0.184096	0.239434
Collagen III	0.033533	0.0588	0.049491	0.042842	0.331771	0.276337	0.231853	0.197926	0.1301	0.093172	0.15266	0.154664
Figure 8e
Echocardiographic indicators	cTnI-WT+DMSO						cTnIR193H-het+DMSO						cTnIR193H-het+C176
EF (%)	77.8902	76.2248	80.5854	80.1527	76.7327	79.513	76.2792	83.1444	76.337	85.0157	77.5288	77.5477	81.6586	84.1848	75.4194	81.363	80.4279	78.5513	82.3091
LVID.d (mm)	3.6281	3.24878	3.07888	3.08526	2.76827		2.45177	2.89061	2.88142	2.43641	2.5001	2.27465	2.79033	2.89161	2.80159	3.20698	2.78579	3.06811	3.23942
IVRT(mm)	13.8889	14.7222	15.8333	14.4444	15.2778	16.1111	16.6667	17.7778	16.6667	17.2222	17.5	16.6667	15	15.2778	16.6667	16.3889	15.5556	15	14.7222
Figure 8f
Relative protein expression	cTnI-WT+DMSO				cTnIR193H-het+DMSO				cTnIR193H-het+C176
p-TBK1	0.27	0.23	0.28	0.22	0.723804	0.994665	0.550025	0.390788	0.522103	0.255121	0.151696	0.286767
p-IRF3	0.5124	0.475514	0.518979	0.468935	0.561849	0.561673	0.774903	0.857883	0.49901	0.410113	0.496703	0.48519
Figure 8g
Relative gene expression	cTnI-WT+DMSO				cTnIR193H-het+DMSO				cTnIR193H-het+C176
IFNB1	2.76669	2.52078	1.50553	2.23659	5.40432	5.12676	7.23975	7.81711	3.77947	3.06639	4.94027	3.1045
Figure 8h
Relative IFN-β concentration in heart tissue	cTnI-WT+DMSO						cTnIR193H-het+DMSO							cTnIR193H-het+C176
	2.10803	1.93046	2.39635	2.17621	1.89874	2.26594	3.09378	2.8695	2.85694	2.56631	2.67094	3.12438	2.73505	2.35132	2.04677	2.72418	2.76626	2.20457
Figure 8i
IFN-β concentration in serum	cTnI-WT+DMSO						cTnIR193H-het+DMSO						cTnIR193H-het+C176
	12.5527	10.4041	7.43135	13.1521	13.7568	14.7765	14.3669	15.6025	18.7759	22.7304	19.4243	17.7052	12.1562	7.43135	15.3951	14.9822	16.0187	13.7568
