# Supplementary material for: Activation of the cGAS-STING pathway mediated by Irgm1 contributes to the development of restrictive cardiomyopathy induced by cTnIR193H mutation
Source: Research Square preprint supplement (doi:10.21203/rs.3.rs-6200397/v1), 2025-04-04
Supplement: Supplementary file 3 [file 7f3ef42bf05086e01107aeb1.docx]

**Supplementary Figures and Tables**


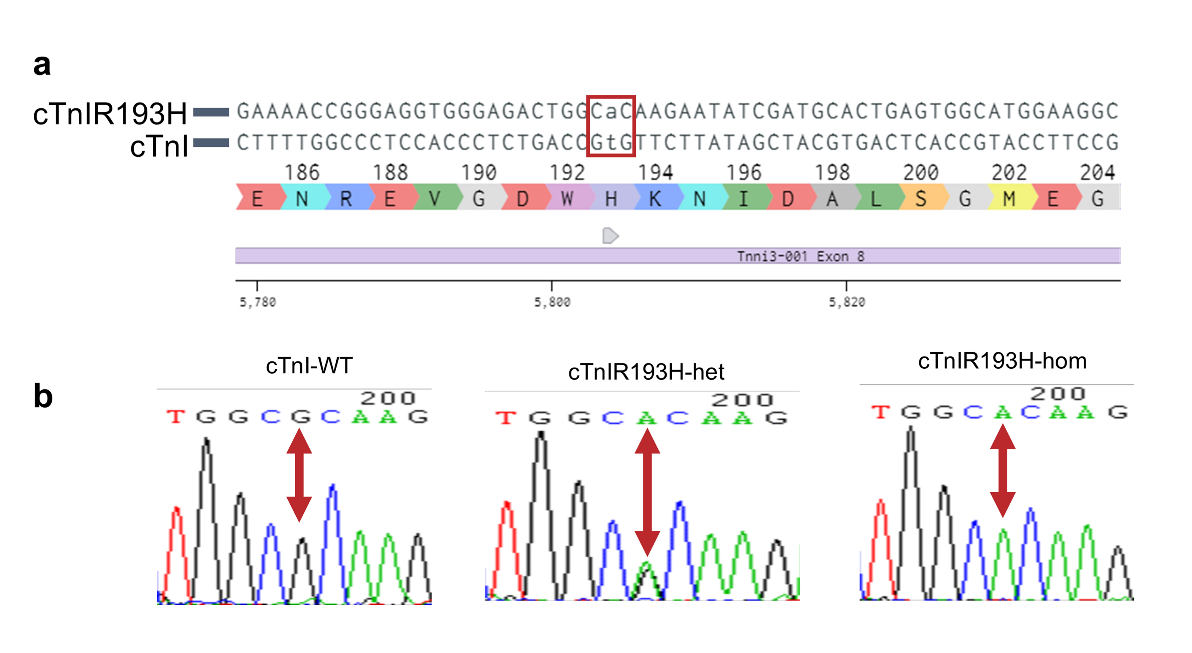


**Figure. S1. Generation and genotyping of cTnIR193H mutant mice. (a)** Diagram illustrating the nucleotide and amino acid mutations in cTnIR193H mice. **(b)** Sanger sequencing was used to identify the genotype of the mutant mice.


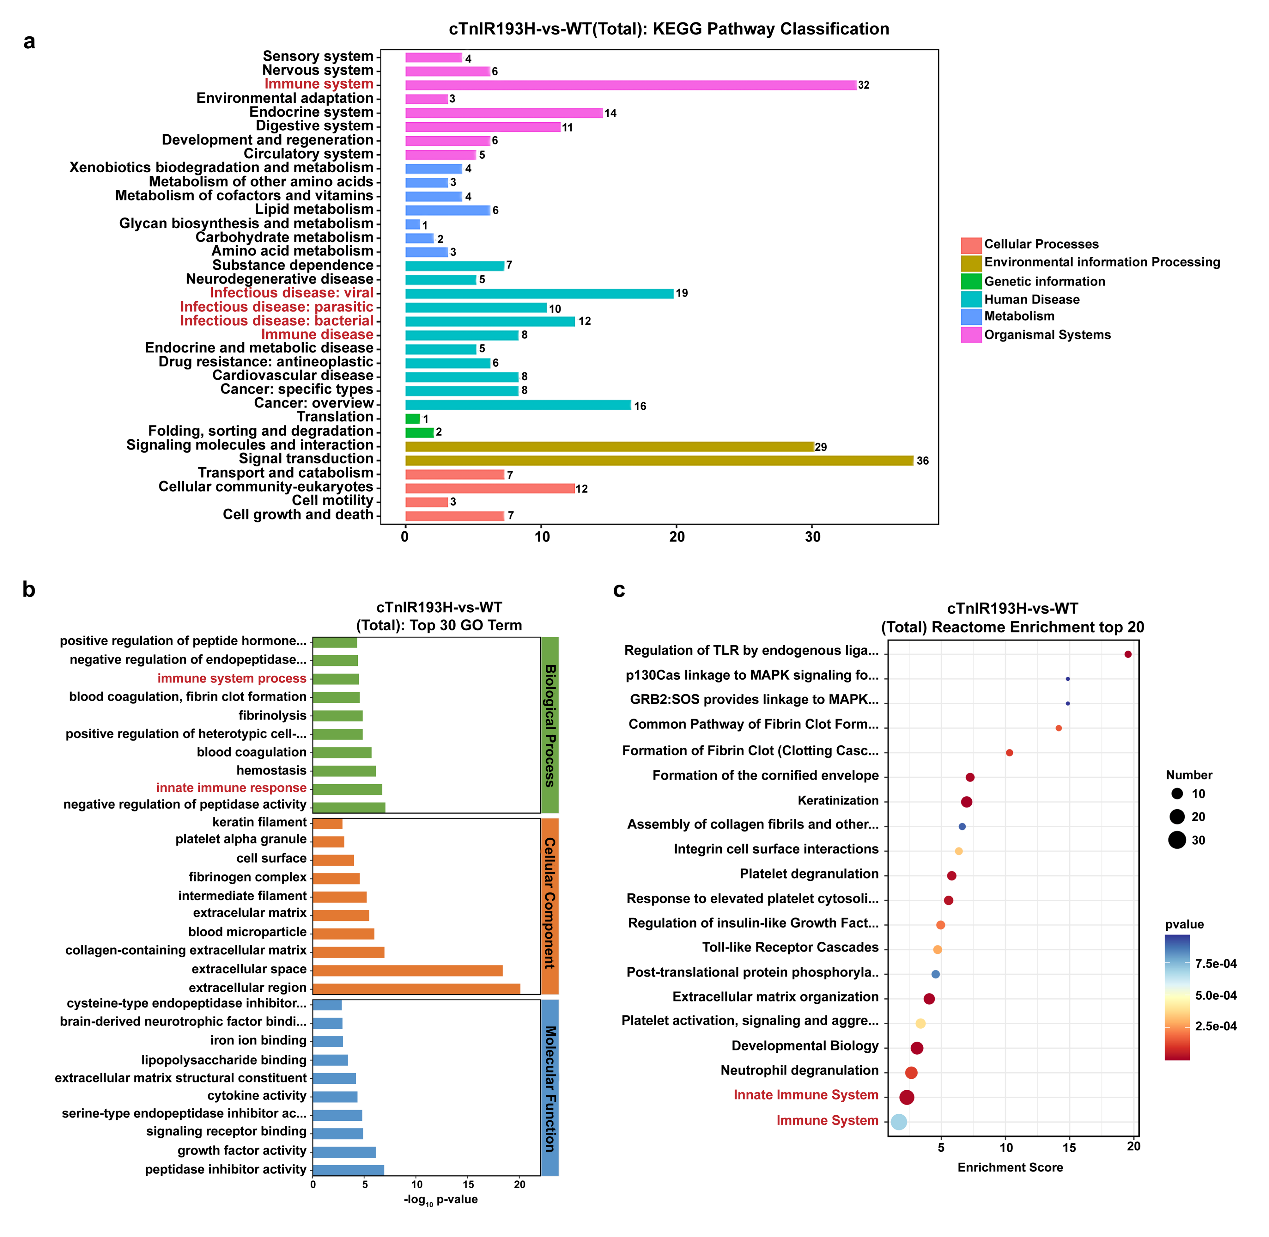


**Figure. S2. RNA-Seq-based transcriptome analysis of hearts from cTnIR193H heterozygous and control mice. (A)** KEGG pathway analysis of DEGs between the cTnI and cTnIR193H groups. The color of the bar represents the enriched items in KEGG pathway analysis. **(B)** GO enrichment analysis of DEGs between the cTnI and cTnIR193H groups. The length of the bar represents the range of the P value. **(C)** Top 20 Reactome enrichment analysis of DEGs between the cTnI and cTnIR193H groups. The number of enriched DEGs in the path is represented by the circled area, and the color of the circle represents the range of the P value.

**Table S1. Primers used for full-length gene amplification in yeast plasmid construction.**

| Gene | **Sequence (5’→3’)** | Primers |
| --- | --- | --- |
| Irgm1 | GGGGACAAGTTTGTACAAAAAAGCAGGCTTCATGAAACCATCACACAGTTCCTG | Irgm1-F |
| GGGGACCACTTTGTACAAGAAAGCTGGGTCCTAGATCTGCGGAGGGAAGATGG | Irgm1-R |
| STAT1 | GGGGACAAGTTTGTACAAAAAAGCAGGCTTCATGTCACAGTGGTTCGAGCTTCAG  GGGGACCACTTTGTACAAGAAAGCTGGGTCTTATACTGTGCTCATCATACTGTC | STAT1-F  STAT1-R |
| TNNI3* | GGGGACAAGTTTGTACAAAAAAGCAGGCTTCATGGCTGATGAGAGCAGCGATGC  GGGGACCACTTTGTACAAGAAAGCTGGGTCTCAGAAATCAAACTTTTTCTTGC | TNNI3*-F  TNNI3*-R |
| TNNI3 | GGGGACAAGTTTGTACAAAAAAGCAGGCTTCATGGCTGATGAGAGCAGCGATGC  GGGGACCACTTTGTACAAGAAAGCTGGGTCTCAGCCCTCAAACTTTTTCTTGC | TNNI3-F  TNNI3-R |

*: TNNI3-p.R193H point mutation

**Table S2. Primary antibodies used for this study.**

| Antibodies | Application | Source | Identifier |
| --- | --- | --- | --- |
| HA (1:3000) | WB | MBL | M132-3 |
| Flag (1:1500) | WB | Genscript | A00187 |
| IRGM (1:1000) | WB | CST | 71950 |
| cGAS (1:1000) | WB | CST | D3O8O |
| STING (1:500) | WB | ZENBIO | 300415 |
| TBK1 (1:1000) | WB | Abmart | T55145 |
| p-TBK1 (1:1000) | WB | Abmart | T58364 |
| IRF3 (1:1000) | WB | Abmart | T55779 |
| p-IRF3 (1:1000) | WB | proteintech | 29528-1-AP |
| Collagen I (1:500) | WB | Servicebio | GB115707-100 |
| Collagen III (1:500) | WB | Servicebio | GB111629-100 |
| cTnI (1:1000) | WB | Abcam | AB314912 |
| HSP90 (1:5000) | WB | ORIGENE | TA500494 |
| GAPDH (1:5000) | WB | ZENBIO | R24404 |
| HRP-conjugated Streptavidin (1:10000) | WB | proteintech | SA00001-0 |
| cTnI (1:50) | IP | Abcam | AB314912 |
| cGAS (1:200) | IP | CST | D3O8O |
| Normal rabbit IgG (1:50) | IP | CST | 2729 |
| cTnI (1:200) | IF | Abcam | AB56357 |
| cTnT(1:500) | IF | Abcam | AB8295 |
| HA (1:50) | IF | proteintech | 51064-2-AP |
| IRGM (1:50) | IF | Novus | NBP1-76377 |
| Collagen I (1:200) | IF | proteintech | 14695-1-AP |
| Collagen III (1:200) | IF | proteintech | 22734-1-AP |

**Table S3. Primers used for RT-PCR analysis.**

| Gene | **Sequence (5’→3’)** | Primers |
| --- | --- | --- |
| Irgm1 | ACAGGCTCCAGCAGGTTACC | Irgm1-F |
| CTCCTTGATTCCGTAGACCAGTTC | Irgm1-R |
| Col1a1 | GCTTCCTGCCTCAGCCACCT  AGCCCTCGCTTCCGTACTCG | Col1a1-F  Col1a1-R |
| Col3a1 | GCCCACAGCCTTCTACACCT  ACCCATTCCTCCCACTCCA | Col3a1-F  Col3a1-R |
| IFNB1 | GGATCCTCCACGCTGCGTTCC  CCGCCCTGTAGGTGAGGTTGA | IFNB1-F  IFNB1-R |
| 18S | CGCCGCTAGAGGTGAAATTCT  CATTCTTGGCAAATGCTTTCG | 18S-F  18S-R |

**Table S4. Genotyping primers for Irgm1 knock out and cTnIR193H mice.**

| Genotype | **Sequence (5’→3’)** | Primers |
| --- | --- | --- |
| Irgm1 KO | GGA GAA AGT GAA GTA CCC | Irgm1-F |
| CTCTGACACCGAGAGAAT | Irgm1-R |
| CATTTGTCACGTCCTGCA | Irgm1-neo |
| cTnIR193H | GAGACAGGAAGTGCATGAGTGTGA | cTnIR193H-F |
| CTTGGCACGTTCTATGCTCTCTG | cTnIR193H-R |

**Table S5. BioID-MS identification of the differential interacting proteins between cTnI and cTnIR193H after removing background biotinylated proteins by comparing both groups with the empty vector group**

| No. | Accession | Protein name | Gene name | Intensity |
| --- | --- | --- | --- | --- |
| 1 | P24457 | Cytochrome P450 2D11 | Cyp2d11 | Increase |
| 2 | Q8BL65 | Actin-binding LIM protein 2 | Ablim2 | Increase |
| 3 | Q9CXY9 | GPI-anchor transamidase | Pigk | Increase |
| 4 | Q9ERU3 | Zinc finger protein 22 | Znf22 | Increase |
| 5 | O08579 | Emerin | Emd | Increase |
| 6 | P48410 | ATP-binding cassette sub-family D member 1 | Abcd1 | Increase |
| 7 | Q8K010 | 5-oxoprolinase | Oplah | Increase |
| 8 | Q9CWV4 | Melanoma-associated antigen B16 | Mageb16 | Increase |
| 9 | Q9CQN6 | Transmembrane protein 14C | Tmem14c | Increase |
| 10 | P28660 | Nck-associated protein 1 | Nckap1 | Increase |
| 11 | Q9CXA2 | Trans-L-3-hydroxyproline dehydratase | L3hypdh | Increase |
| 12 | P16332 | Methylmalonyl-CoA mutase, mitochondrial | Mmut | Increase |
| 13 | P42225 | Signal transducer and activator of transcription 1 | Stat1 | Increase |
| 14 | Q60766 | Immunity-related GTPase family M protein 1 | Irgm1 | Increase |
| 15 | Q9QZ85 | Interferon-inducible GTPase 1 | Iigp1 | Increase |
| 16 | Q9R233 | Tapasin | Tapbp | Increase |
| 17 | Q569Z6 | Thyroid hormone receptor-associated protein 3 | Thrap3 | Increase |
| 18 | Q8R411 | Myc target protein 1 | Myct1 | Increase |
| 19 | Q9DCJ7 | Aurora kinase A-interacting protein | Aurkaip1 | Increase |
| 20 | D3Z7P3 | Glutaminase kidney isoform, mitochondrial | Gls | Decrease |
| 21 | Q9CZN7 | Serine hydroxymethyltransferase, mitochondrial | Shmt2 | Decrease |
| 22 | Q9D289 | Trafficking protein particle complex subunit 6B | Trappc6b | Decrease |
| 23 | P54797 | Transport and Golgi organization 2 homolog | Tango2 | Decrease |
| 24 | Q9CQI6 | Coactosin-like protein | Cotl1 | Decrease |
| 25 | Q9D0J4 | ADP-ribosylation factor-like protein 2 | Arl2 | Decrease |
| 26 | Q8BXN7 | Protein phosphatase 1K, mitochondrial | Ppm1k | Decrease |
| 27 | Q9CY28 | GTP-binding protein 8 | Gtpbp8 | Decrease |
| 28 | Q9JHK5 | Pleckstrin | Plek | Decrease |
| 29 | P68134 | Actin, alpha skeletal muscle | Acta1 | Decrease |
| 30 | Q9CQ19 | Myosin regulatory light polypeptide 9 | Myl9 | Decrease |
| 31 | P01942 | Hemoglobin subunit alpha | Hba | Decrease |
| 32 | Q8VE08 | F-box only protein 33 | Fbxo33 | Decrease |
| 33 | Q922Q4 | Pyrroline-5-carboxylate reductase 2 | Pycr2 | Decrease |

**Table S6. Representative M-mode and PW-mode echocardiograms from the cTnIR193H heterozygous after 3 months of treatment**

| Parameters | 1M | | | 2M | | | 3M | | | 4M | | |
| --- | --- | --- | --- | --- | --- | --- | --- | --- | --- | --- | --- | --- |
| WT+DMSO | 193+DMSO | 193+C176 | WT+DMSO | 193+DMSO | 193+C176 | WT | 193+DMSO | 193+C176 | WT | 193+DMSO | 193+C176 |
| n=6 | n=7 | n=6 | n=6 | n=7 | n=7 | n=7 | n=7 | n=7 | n=6 | n=6 | n=7 |
| Body weight(g) |  |  |  |  |  |  |  |  |  |  |  |  |
| Heart rate(beats/minute) | 524.20±16.48 | 529.10±13.35 | 522.50±10.09 | 504.70±20.72 | 512.40±22.08 | 506.40±9.06 | 512.80±17.60 | 502.9±25.13 | 510.00±7.09 | 494.00±8.49 | 499.30±22.48 | 494.00±8.29 |
| LV end-diastolic |  |  |  |  |  |  |  |  |  |  |  |  |
| LVID(mm) | 3.06±0.10 | 3.07±0.12 | 2.91±0.31 | 3.43±0.13 | 2.97±0.16** | 3.01±0.22** | 3.23±0.13 | 2.82±0.16* | 2.84±0.28* | 3.16±0.31 | 2.57±0.25** | 2.97±0.20† |
| LV PW(mm) | 0.68±0.09 | 0.70±0.05 | 0.70±0.06 | 0.78±0.11 | 0.70±0.10 | 0.72±0.12 | 0.82±0.12 | 0.72±0.10 | 0.75±0.13 | 0.84±0.11 | 0.88±0.08 | 0.86±0.06 |
| LV volume（ul） | 36.74±2.76 | 37.09±3.51 | 33.21±8.63 | 45.25±8.85 | 34.47±4.48* | 37.05±6.84 | 39.61±5.31 | 31.84±5.56* | 32.52±3.89* | 37.40±10.62 | 25.77±4.93* | 33.05±4.99 |
| LV end-systolic |  |  |  |  |  |  |  |  |  |  |  |  |
| LVID(mm) | 1.79±0.10 | 1.61±0.14 | 1.68±0.29 | 2.11±0.24 | 1.64±0.14** | 1.72±0.18** | 1.87±0.35 | 1.47±0.31* | 1.60±0.19 | 1.84±0.29 | 1.46±0.26* | 1.47±0.08* |
| LV PW(mm) | 1.00±0.09 | 1.08±0.07 | 1.02±0.09 | 1.10±0.10 | 1.08±0.07 | 1.11±0.09 | 1.09±0.07 | 1.27±0.11* | 1.26±0.16* | 1.32±0.30 | 1.35±0.17 | 1.25±0.13 |
| LV volume（ul） | 9.71±1.31 | 8.11±1.52 | 8.53±3.19 | 14.91±4.37 | 8.70±2.94** | 10.11±2.86* | 11.41±5.16 | 6.22±3.53* | 6.24±0.99* | 10.72±4.09 | 6.07±2.49* | 5.77±0.86* |
| EF(%) | 73.56±3.04 | 77.25±2.97 | 74.06±3.55 | 68.79±3.63 | 74.43±3.86 | 74.31±4.24 | 72.02±9.93 | 82.18±7.29 | 79.09±5.75 | 78.52±1.83 | 79.31±3.78 | 80.56±2.85 |
| FS(%) | 41.38±2.60 | 44.63±3.01 | 43.67±5.03 | 37.56±2.93 | 42.12±3.52 | 41.88±3.61 | 40.82±8.46 | 50.37±7.89 | 46.63±5.91 | 44.15±2.04 | 44.82±2.39 | 45.12±2.34 |
| Stroke Volume | 27.02±2.31 | 29.05±2.84 | 24.90±5.55 | 32.50±2.54 | 26.65±4.23 | 26.53±4.80 | 28.20±2.99 | 27.62±5.11 | 28.53±4.66 | 22.16±5.40 | 23.53±4.34 | 24.12±1.16 |
| CO(ml/min) | 14.36±0.96 | 13.88±2.42 | 12.72±3.11 | 15.37±3.19 | 13.74±2.24 | 13.73±2.17 | 14.47±1.75 | 13.82±2.27 | 14.49±2.32 | 13.96±3.35 | 14.10±3.17 | 14.25±2.54 |
| LV mass | 83.52±6.68 | 77.75±7.78 | 71.55±11.75 | 108.3±17.25 | 79.59±13.70* | 87.44±17.45 | 105.50±23.25 | 87.05±19.05 | 88.91±8.67 | 104.30±7.86 | 107.10±20.54 | 102.50±6.47 |
| Corrected（mg） | 69.99±9.13 | 64.92±5.26 | 60.08±10.91 | 86.60±13.80 | 63.67±10.96* | 69.96±13.96 | 84.43±18.60 | 69.64±15.24 | 73.82±10.83 | 86.31±9.37 | 86.26±15.55 | 86.93±4.98 |
| Mitral pulse Doppler |  |  |  |  |  |  |  |  |  |  |  |  |
| IVCT(ms) | 5.55±0.48 | 4.93±0.27 | 5.28±0.34 | 6.53±0.78 | 6.88±1.18 | 6.51±0.68 | 6.07±1.02 | 6.76±0.89 | 5.64±0.86 | 6.34±0.21 | 6.71±0.21** | 6.51±0.15 |
| IVRT(ms) | 12.96±0.23 | 13.10±2.05 | 13.38±1.28 | 14.93±0.83 | 15.09±1.64 | 14.92±0.52 | 14.25±1.28 | 16.61±0.77** | 15.20±0.59 | 15.05±0.85 | 17.08±0.49*** | 15.52±0.74†† |
| MV E/A | 1.54±0.16 | 1.46±0.39 | 1.48±0.09 | 1.40±0.14 | 1.36±0.22 | 1.39±0.06 | 2.05±0.37 | 1.75±0.50 | 1.74±0.13 | 1.71±0.10 | 1.59±0.16 | 1.62±0.09 |

Values are expressed as means ±SE. Statistical significance was determined by ANOVA followed by independent sample t-test. LVID: Left Ventricular Dimensions; LPW: Left Ventricular Posterior Wall; LVEF: Left Ventricular Ejection Fraction; LVFS: Left Ventricular Fractional Shortening; IVCT: Isovolumic Contraction Time; IVRT: Isovolumic Relaxation Time; MV: Mitral Valve. *P<0.05 **P<0.01 ***P<0.001 compared to WT+DMSO; †P<0.05 ††P<0.01 †††P<0.001 compared to cTnIR193H+DMSO.
